# Supplementary material for: Overexpression of E2F mRNAs Associated with Gastric Cancer Progression Identified by the Transcription Factor and miRNA Co-Regulatory Network Analysis
Source: PLoS One. 2015 Feb 3;10(2):e0116979. doi: 10.1371/journal.pone.0116979 (PMC4315469; doi:10.1371/journal.pone.0116979)
Supplement: S2 Table — Gene expression levels in gastric cancer tissues vs. the distant normal tissues were at least 1.5-fold different with a p-value <0.05. (XLSX) [file pone.0116979.s002.xlsx]

## Sheet: Sheet1
here shows the 980 differential genes (> 1.5 fold change) in gastric cancer tissues versus adjacent normal tissues, only official gene symbols are used
C1-45 represent cancer tissues, N1-45 represent adjacent normal tissues
Log2FC = Log2 (Fold Change, cancer tissues versus adjacent normal tissues)
mRNA Accession	Gene Symbol	Description	Fold change	P_value	Bonferroni	N1	N2	N3	N4	N5	N6	N7	N8	N9	N10	N11	N12	N13	N14	N15	N16	N17	N18	N19	N20	N21	N22	N23	N24	N25	N26	N27	N28	N29	N30	N31	N32	N33	N34	N35	N36	N37	N38	N39	N40	N41	N42	N43	N44
NM_001898	CST1	Homo sapiens cystatin SN (CST1), mRNA.	7.31017	1.9e-15	3.12645e-11	4.54558	4.25238	4.30401	4.75141	6.19573	4.4968	4.51326	5.87056	3.97635	5.66702	5.89927	4.32558	4.19039	3.31843	3.30092	3.97857	2.99419	3.28503	4.19759	3.53815	2.73072	3.67138	3.68136	3.95866	4.60396	3.81043	2.75615	2.27864	3.12728	3.17032	3.57962	4.75903	1.87951	2.52806	2.18444	2.34207	2.43808	2.723	1.87501	1.88177	2.5233	2.45989	7.94995	3.57706
NM_001322	CST2	Homo sapiens cystatin SA (CST2), mRNA.	3.71077	5.33e-16	8.77051e-12	5.57914	5.06408	5.68646	5.6493	5.69726	5.50512	5.0934	5.67501	5.49861	6.13668	6.09049	4.84567	4.98304	4.05989	5.19622	5.5075	3.79131	5.48232	5.37176	4.25831	4.49357	4.54513	4.01547	4.22614	4.47572	6.49886	3.05982	3.36149	3.78633	3.8721	3.84472	6.18994	4.79519	4.45457	4.96576	4.55996	4.38852	4.27397	4.0999	3.89247	4.89133	4.45616	5.53784	4.20328
NM_003014	SFRP4	Homo sapiens secreted frizzled-related protein 4 (SFRP4), mRNA.	3.68254	1.25e-12	2.05688e-08	5.17048	6.09693	5.31305	4.93536	8.17079	6.73599	5.85405	4.63941	4.70105	5.34877	4.34768	5.21974	4.72073	4.02737	5.31066	6.07313	7.00016	4.71678	5.25262	4.13666	3.638	5.1239	4.36779	6.57922	5.7949	3.3714	5.21908	5.68028	4.5463	3.34407	4.50322	2.86868	3.73682	3.13315	3.36248	4.56003	5.02884	4.4434	4.16461	2.99831	3.35486	3.05528	6.12416	3.05502
NM_002423	MMP7	Homo sapiens matrix metallopeptidase 7 (matrilysin, uterine) (MMP7), mRNA.	3.60332	4.34e-13	7.14147e-09	4.56899	5.71651	5.92163	5.57524	5.33346	4.33177	5.09545	4.66707	5.15102	6.38352	4.27545	3.46648	3.52735	3.40796	3.148	6.33748	3.15772	4.15209	2.92608	4.42502	3.8222	3.06902	4.61344	5.12944	5.13768	3.66674	5.38939	3.44339	4.98326	4.20567	3.92124	4.56946	3.88712	4.06634	3.59402	4.01463	4.07502	7.60385	4.43962	5.63913	5.60837	5.29634	5.99772	4.9351
NM_001307	CLDN7	Homo sapiens claudin 7 (CLDN7), mRNA.	3.45804	7.19e-12	1.18311e-07	5.76529	6.17877	5.59195	7.29863	6.08503	5.11733	6.07247	5.65637	5.1382	5.58617	5.87861	4.30734	8.99643	4.11599	4.6603	7.10406	7.06978	9.1249	4.25721	4.29042	4.26793	4.66057	5.10465	6.71667	7.09328	4.92015	6.97149	4.95184	6.52088	4.53027	6.0483	4.06911	5.17315	5.30505	4.96938	4.53113	5.12213	5.78815	5.15248	4.42322	4.97568	8.08647	8.0132	3.88266
NM_021101	CLDN1	Homo sapiens claudin 1 (CLDN1), mRNA.	3.43132	6.8e-16	1.11894e-11	5.08308	4.97421	4.73968	4.90881	5.9081	5.39518	5.17691	4.86795	4.6567	4.99116	4.46573	4.81004	4.17727	4.02243	4.19857	4.51035	6.33515	4.12228	4.55285	4.02679	3.83185	4.38379	3.37469	4.63364	5.90142	4.21577	5.86261	2.72422	3.6071	3.10194	3.27184	3.52418	2.96054	3.37814	3.13553	3.4453	3.67435	4.0398	3.23193	3.24793	3.78882	4.22272	6.58511	3.55912
NM_004063	CDH17	Homo sapiens cadherin 17, LI cadherin (liver-intestine) (CDH17), mRNA.	3.0478	2.23e-07	0.00366946	3.68646	4.20141	3.81765	6.27777	4.82431	4.42876	4.79374	3.69471	3.97621	3.61919	4.16971	3.06776	8.00977	2.41231	3.52815	5.29736	5.69833	8.29918	2.49808	2.53019	2.19581	3.1072	2.80967	5.12696	4.96747	3.11292	3.97013	3.06746	4.87038	2.73095	4.49408	2.64237	3.06272	2.77814	2.78129	2.48395	2.69705	4.29087	3.69762	2.72611	3.97633	7.76567	6.06679	2.1674
NM_004460	FAP	Homo sapiens fibroblast activation protein, alpha (FAP), mRNA.	3.03649	1.5e-14	2.46825e-10	2.81124	3.50317	3.1305	2.66732	4.95444	4.07832	2.69238	3.00906	2.45657	3.94582	3.26628	2.47496	2.03918	2.31543	2.62745	2.54627	3.91609	2.01561	2.17343	2.18302	1.84456	2.60893	2.82685	3.32656	2.44257	1.87288	2.51438	2.64215	2.18347	1.63987	2.48857	2.01439	2.45132	2.07009	1.92795	2.27784	2.04176	2.1196	1.94893	1.89099	1.81111	1.6064	1.95605	1.61458
NM_002483	CEACAM6	Homo sapiens carcinoembryonic antigen-related cell adhesion molecule 6 (non-specific cross reacting antigen) (CEACAM6), mRNA.	3.01772	1.02e-07	0.00167841	5.14484	6.6132	4.89832	7.42362	3.89126	4.614	6.31804	4.36673	4.66883	4.04455	3.9667	3.14463	7.78717	3.09587	3.80542	6.96685	6.07983	7.974	3.47418	4.56338	4.34539	3.93962	4.71837	4.35945	7.47065	3.47418	6.16773	3.61532	5.49082	5.40153	6.68361	2.46859	3.97369	5.7917	4.08115	5.494	5.31419	6.04943	3.71058	4.41531	6.17175	6.26699	7.89443	3.60271
NM_001254	CDC6	Homo sapiens cell division cycle 6 homolog (S. cerevisiae) (CDC6), mRNA.	3.01018	6.79e-18	1.11729e-13	4.68175	4.71348	4.18204	4.62645	4.09825	3.51305	4.67323	3.48855	3.7698	4.3329	3.82135	2.01759	3.22838	1.99473	2.80758	3.38817	3.15644	3.61858	2.70046	3.44943	3.17617	2.8212	3.34667	4.38682	4.78149	3.14394	4.14046	1.94815	2.50732	2.24046	2.8866	2.79032	3.607	4.10075	3.42467	4.78302	3.62616	4.32929	3.03697	3.43934	3.5537	3.3074	3.85396	2.68007
NM_000088	COL1A1	Homo sapiens collagen, type I, alpha 1 (COL1A1), mRNA.	2.96408	1.15e-14	1.89232e-10	8.75393	8.55153	8.1286	8.46344	11.2242	9.25814	8.36278	8.64544	7.79623	8.13994	8.27114	8.26085	7.74215	7.26211	7.71013	8.44399	9.16846	7.69664	8.4723	7.20391	6.97303	7.36218	7.50469	8.75692	8.38836	6.6269	8.71207	8.02098	8.01396	7.19776	7.70765	7.01449	7.64285	7.35715	8.00642	7.95803	8.77527	7.3041	7.87306	6.7023	7.27897	7.68076	9.15382	7.18901
NM_002426	MMP12	Homo sapiens matrix metallopeptidase 12 (macrophage elastase) (MMP12), mRNA.	2.94246	6.55e-14	1.0778e-09	5.56797	4.7607	4.41757	3.81975	3.81535	2.94189	5.70331	3.68977	3.42382	3.85972	3.58322	2.05816	4.80766	2.25502	2.30436	5.2184	4.41643	4.93996	2.67284	5.79991	3.93244	2.19241	2.92826	2.51484	4.78684	2.35702	4.76269	2.39964	2.7643	2.92189	3.9349	2.79781	2.35618	2.54123	2.65529	3.15182	3.00191	2.64253	2.74215	4.15899	6.33329	4.87202	5.95583	3.73377
NM_001067	TOP2A	Homo sapiens topoisomerase (DNA) II alpha 170kDa (TOP2A), mRNA.	2.9307	1.36e-16	2.23788e-12	4.22739	4.81677	4.4209	4.47499	4.20983	4.12291	4.97601	3.24829	3.54517	3.54963	3.51456	3.06355	3.79196	3.16216	3.02174	4.0064	4.63248	3.90442	2.58949	3.22926	3.09576	2.6787	3.16351	4.71855	4.72987	3.33224	3.87304	3.09963	3.23975	3.82827	3.60745	3.22236	3.5044	4.59351	3.78206	4.0657	3.19076	3.7595	3.34375	4.1593	4.37967	4.17924	4.51426	3.30312
NM_001040058	SPP1	Homo sapiens secreted phosphoprotein 1 (osteopontin, bone sialoprotein I, early T-lymphocyte activation 1) (SPP1), transcript variant 1, mRNA.	2.90959	1.34e-11	2.20497e-07	6.00982	5.67072	5.57475	5.47418	7.07724	6.10777	4.98526	4.71946	4.61222	5.81556	5.50631	4.202	4.66617	3.82709	4.29179	4.88687	6.71074	4.44971	4.24762	5.36711	3.83271	3.94733	4.90736	4.94762	4.79962	3.83926	4.92497	5.02424	6.42597	3.84762	5.37106	3.13972	5.21572	4.65441	3.6676	4.29139	4.61758	4.644	4.91694	4.45997	5.57841	4.45997	7.97363	4.80074
NM_002421	MMP1	Homo sapiens matrix metallopeptidase 1 (interstitial collagenase) (MMP1), mRNA.	2.907	1.19e-12	1.95814e-08	6.26863	7.0624	5.77023	6.29704	4.0897	5.09889	5.55517	5.19799	4.75499	6.41029	5.05269	3.95852	6.06209	4.71627	4.79415	5.81973	4.00864	6.2765	3.59967	4.30056	4.11421	4.41585	5.89923	4.17336	5.7502	3.46181	6.61944	3.97515	4.02454	4.40463	4.34892	4.3141	4.23672	4.87456	3.89937	5.24484	3.86027	4.22616	2.74119	4.13849	5.49884	4.83839	4.682	3.71731
NM_018492	PBK	Homo sapiens PDZ binding kinase (PBK), mRNA.	2.84205	5.21e-20	8.57306e-16	3.7915	4.09445	3.39636	3.51913	3.34718	2.76709	3.99245	3.12794	3.04216	3.73752	3.45237	1.75333	3.28224	2.35317	2.69893	2.90122	3.21246	3.33647	2.62658	2.89675	2.94706	2.35763	2.98825	4.62705	3.06249	2.02598	3.8768	3.23884	2.24575	3.28689	2.8137	2.27826	2.43982	3.40304	2.80139	3.28414	2.34554	2.84622	2.35927	3.5418	4.19257	2.84049	4.23993	2.32952
NM_000745	CHRNA5	Homo sapiens cholinergic receptor, nicotinic, alpha 5 (CHRNA5), mRNA.	2.83672	5.89e-13	9.692e-09	3.32779	3.58093	3.34486	3.81469	4.2358	3.34454	3.47766	3.01869	3.53013	3.84887	3.68718	2.44878	3.18122	2.41027	2.406	2.63759	2.8664	2.72051	2.02679	2.05151	2.19928	2.25767	2.43575	4.3083	2.77344	2.37804	3.28383	2.69432	5.67509	2.50496	2.45119	3.45889	2.40139	2.37398	2.41323	2.43315	2.19214	2.49819	2.71237	2.2492	2.52689	2.74614	3.40642	1.96597
NM_001305	CLDN4	Homo sapiens claudin 4 (CLDN4), mRNA.	2.80657	4.34e-12	7.14147e-08	6.7587	6.59944	6.78162	6.66374	5.71316	5.8024	6.01335	4.99915	5.56664	6.25436	5.90034	4.85764	8.00111	4.90136	5.53146	5.67963	7.15131	8.13725	4.21352	4.24888	4.25549	3.97401	4.65085	6.5365	6.46485	4.65682	5.99397	3.63112	5.4832	3.53191	4.89312	3.38101	4.71389	6.36155	4.84785	5.20401	4.93162	5.92042	4.56018	5.12097	6.45502	7.47076	6.89813	4.54683
NM_006288	THY1	Homo sapiens Thy-1 cell surface antigen (THY1), mRNA.	2.75533	2.59e-15	4.26185e-11	6.72661	6.9752	6.50279	6.52285	8.56181	7.43039	6.23806	5.21204	5.89971	6.57991	5.40447	6.36202	6.3715	5.16415	6.50126	6.21343	6.87846	6.43222	6.39382	5.94448	4.59436	6.11105	5.97523	6.46295	6.04165	4.18999	6.61721	6.46075	5.68582	5.54866	6.22081	4.85832	6.11494	5.20613	4.67997	5.96067	6.70157	5.55713	5.36729	4.6489	5.83917	5.29535	6.1257	5.15742
NM_001565	CXCL10	Homo sapiens chemokine (C-X-C motif) ligand 10 (CXCL10), mRNA.	2.70776	1.09e-08	0.00017936	5.62857	5.01949	5.4893	8.43815	7.70592	4.92301	5.52588	4.43523	4.15257	6.59975	3.40863	3.7759	3.85182	3.84098	3.96347	5.05725	7.3511	3.9868	2.62517	4.63503	4.01063	3.72481	3.50969	6.22492	5.01424	1.98298	3.61377	2.91057	3.98684	5.2737	6.09633	5.19852	4.81568	4.04912	2.96953	4.02529	3.09898	3.23054	2.32599	4.51998	6.53252	3.49557	3.60528	3.01353
NM_002422	MMP3	Homo sapiens matrix metallopeptidase 3 (stromelysin 1, progelatinase) (MMP3), mRNA.	2.69797	2.09e-12	3.43909e-08	4.81799	3.90197	4.06699	4.23824	4.01807	4.05218	3.76402	3.89088	3.30265	4.75921	4.14426	2.84505	3.2928	2.51389	2.7107	4.14074	3.13994	2.9779	2.53156	2.6953	3.01796	2.45251	2.95137	2.89148	5.12148	3.25839	4.571	3.11517	2.95982	3.11702	2.24962	2.7569	2.80283	2.64899	2.55164	2.56767	2.54373	2.78207	2.84189	2.91986	3.64474	3.4177	3.86311	3.12705
NM_001827	CKS2	Homo sapiens CDC28 protein kinase regulatory subunit 2 (CKS2), mRNA.	2.64851	1.18e-14	1.94169e-10	5.12648	5.1514	5.81981	5.35396	5.30746	4.44777	5.33308	4.62434	4.69205	5.60987	4.78178	3.7339	5.48657	4.66457	3.75779	5.28005	5.5807	5.64161	2.37771	5.32312	4.2053	3.81186	5.46695	5.0239	4.92411	2.12655	4.86095	4.14666	3.56365	4.47838	5.7269	4.95224	4.68537	4.0596	3.63805	4.37517	3.43424	4.29549	3.14743	5.24135	5.82911	4.98381	5.18427	3.72194
NM_005375	MYB	Homo sapiens v-myb myeloblastosis viral oncogene homolog (avian) (MYB), mRNA.	2.64709	2.71e-13	4.45931e-09	4.34248	4.74015	4.70343	5.04307	4.35485	4.31431	4.61712	3.98843	4.18419	4.61692	4.64377	3.72692	5.22884	3.57659	3.7865	4.57031	5.1864	5.3466	3.02501	3.00508	3.54123	2.99186	3.33479	3.54546	3.24973	2.77268	4.77055	2.65253	4.17154	3.6109	3.41372	3.51407	3.51271	4.0391	3.64827	3.7606	4.08313	3.61932	3.77781	3.6861	3.97458	4.73974	2.85466	3.20002
NM_018304	PRR11	Homo sapiens proline rich 11 (PRR11), mRNA.	2.60158	4e-19	6.582e-15	3.3677	3.71074	3.37112	3.44093	3.6855	3.48325	4.08829	3.18586	3.03777	4.4394	4.24003	2.65924	3.61734	3.28432	3.28564	3.61082	3.40874	3.47601	2.16399	2.56063	2.79481	2.10052	2.25072	3.08564	2.67405	1.8976	2.89637	2.05342	2.70967	2.91344	2.71739	3.15665	3.08574	3.73754	3.28938	3.46814	3.1917	3.03358	2.9716	3.3631	3.57923	3.08827	4.2043	2.85398
NM_014750	DLG7	Homo sapiens discs, large homolog 7 (Drosophila) (DLG7), mRNA.	2.59953	2.07e-20	3.40619e-16	3.48273	4.13281	3.88473	3.62568	3.34934	3.25291	4.06304	2.90698	3.47398	3.21131	3.62934	1.68633	1.97791	1.60271	1.73568	2.05711	2.38158	2.21012	1.50614	1.87681	1.79238	1.77381	1.75561	2.82965	2.69207	1.53018	2.73536	2.08984	2.14048	2.23467	2.43128	2.46826	2.24804	3.12096	2.41323	2.7847	2.24942	2.33923	2.02558	2.52856	2.54366	2.09608	2.77364	2.01062
NM_002403	MFAP2	Homo sapiens microfibrillar-associated protein 2 (MFAP2), transcript variant 2, mRNA.	2.55873	3.3e-19	5.43015e-15	6.05265	6.19088	6.11965	5.96789	6.95353	6.35056	5.86187	5.88421	5.66493	7.04582	6.84402	5.74975	5.55459	5.41945	5.77366	5.43204	5.8402	5.64104	5.63133	5.11875	4.84732	5.43848	5.05837	5.14393	4.95156	4.74539	4.63124	4.80617	4.96355	4.72641	5.36207	5.35536	4.98915	5.19021	5.46702	5.33678	5.76828	5.23325	4.82376	4.25338	4.39097	4.77953	6.50816	4.74846
NM_145697	NUF2	Homo sapiens NUF2, NDC80 kinetochore complex component, homolog (S. cerevisiae) (NUF2), transcript variant 1, mRNA.	2.53921	5.85e-17	9.62617e-13	3.19799	3.99937	3.06111	3.02486	3.10812	2.85862	3.03281	3.26575	3.0972	3.54673	3.90072	2.05937	2.20417	2.10438	2.29096	2.53369	3.34079	2.35343	2.09737	2.40491	2.291	2.40669	2.45457	3.5254	2.95524	2.15555	3.19106	2.77081	2.82272	2.64593	2.44947	2.52746	2.05247	2.81647	2.21266	2.9154	2.51387	2.467	2.29812	3.56257	2.91433	2.76546	3.15424	2.65827
NM_003254	TIMP1	Homo sapiens TIMP metallopeptidase inhibitor 1 (TIMP1), mRNA.	2.53441	1.11e-13	1.8265e-09	9.68646	9.99444	10.2138	9.76429	11.3462	9.8382	9.30372	7.45396	8.18712	10.5655	8.2052	9.01298	9.31965	7.93015	9.41738	9.585	10.2064	9.63736	9.59226	9.73437	8.85609	9.02525	10.0798	9.46044	8.71675	6.27167	8.98655	8.29529	8.9211	7.77142	9.69422	8.09425	8.75293	8.81988	7.69239	9.07838	9.72857	9.00611	8.26399	8.89053	9.28842	9.20291	9.19362	8.6995
NM_001003954	ANXA13	Homo sapiens annexin A13 (ANXA13), transcript variant 2, mRNA.	2.52629	5.1e-09	8.39205e-05	3.74071	3.69754	3.46618	3.89296	3.4884	3.54506	3.70156	3.63549	3.60636	3.85766	4.20921	2.94907	6.14573	3.11471	3.50942	3.58799	3.43132	6.45662	2.20663	2.13675	1.84142	2.50708	2.07598	2.47785	3.38087	2.28288	1.94321	1.81092	2.16833	1.81981	2.75811	2.26584	2.4598	2.22465	2.12784	2.38564	2.3948	2.761	2.42009	2.02554	2.16508	4.26556	3.79261	1.95766
NM_004701	CCNB2	Homo sapiens cyclin B2 (CCNB2), mRNA.	2.52194	2.95e-17	4.85422e-13	3.93724	3.89832	3.53063	3.13336	3.22279	3.23866	4.04238	3.26399	3.57385	3.20337	3.15749	2.16565	3.16411	2.66316	2.07206	3.06279	3.23414	3.04434	1.85255	3.0207	2.6457	2.07179	2.6015	3.20371	2.70759	1.84456	3.34816	2.49572	2.77995	2.58156	2.88045	2.30951	2.41956	3.20791	1.59718	3.36356	2.15269	2.58856	2.19604	3.8161	4.08032	2.75754	2.97076	2.4934
NM_003513	HIST1H2AB	Homo sapiens histone cluster 1, H2ab (HIST1H2AB), mRNA.	2.52049	2.05e-14	3.37327e-10	4.76451	5.3738	5.23484	4.21423	3.84225	3.57416	5.18569	4.05552	2.87284	4.2304	4.05637	2.83944	2.31826	2.46696	2.64882	3.8771	3.82013	2.44215	2.43111	3.39524	3.804	2.77159	2.709	3.95531	3.08022	1.66361	3.26261	3.06645	2.6851	3.86219	4.60401	3.31071	4.49039	5.22041	4.3991	5.17387	3.55809	3.91772	3.28733	3.35068	4.55297	3.56523	2.81673	2.54379
NM_015170	SULF1	Homo sapiens sulfatase 1 (SULF1), mRNA.	2.51527	4.36e-12	7.17438e-08	5.47082	7.33038	5.76789	5.82295	8.20075	6.96159	6.28466	4.55447	5.45666	5.62614	5.22222	5.45345	4.34564	3.96177	4.65429	5.07428	5.86695	4.5931	4.97908	4.52248	4.73808	4.74627	4.9055	6.15203	6.01052	4.10155	6.66299	5.45201	6.22712	3.94063	4.64094	4.05217	4.91244	4.66117	4.03954	4.8294	5.46747	4.72609	6.07075	4.68794	4.73626	4.59234	4.78976	4.04171
NM_014783	ARHGAP11A	Homo sapiens Rho GTPase activating protein 11A (ARHGAP11A), transcript variant 1, mRNA.	2.49396	1.93e-22	3.17582e-18	4.35357	4.82095	3.96111	4.04794	4.1506	4.17814	4.85629	3.49497	3.97878	3.64074	4.19969	1.98752	2.53611	2.31834	2.10929	2.92586	2.44031	2.41792	2.42289	2.29982	2.35077	2.03465	2.652	2.99867	3.12961	1.8643	2.30268	2.17025	2.31859	2.31837	2.32976	2.24281	2.78917	4.03899	3.62659	3.54145	3.18633	3.39753	3.2596	2.9223	2.98516	2.98382	3.9521	1.92825
NM_003035	STIL	Homo sapiens SCL/TAL1 interrupting locus (STIL), transcript variant 2, mRNA.	2.48936	1.69e-19	2.78089e-15	3.45487	3.79284	3.83218	3.6312	3.23695	3.20765	3.77471	2.9708	3.34476	3.96133	3.97037	2.16925	2.2994	1.71895	2.18536	2.33342	2.30683	2.41273	2.12375	2.23556	2.70017	2.18225	2.28719	3.32514	3.06351	2.2355	2.45189	1.59113	1.77327	2.16036	2.0082	2.51164	2.36569	2.99438	2.64339	2.8261	2.56471	2.62739	2.6902	2.49503	2.43681	2.4848	2.49741	2.08003
NM_018098	ECT2	Homo sapiens epithelial cell transforming sequence 2 oncogene (ECT2), mRNA.	2.48803	2.83e-22	4.65676e-18	4.79589	5.33442	4.46439	4.50097	4.36984	4.12113	4.88624	3.34149	4.09387	4.81422	4.02371	3.44434	3.47527	3.52613	3.77276	4.1785	4.0174	3.91761	2.77349	3.66708	3.44939	3.48992	3.26974	4.18508	4.87969	1.99018	4.7721	3.33222	3.64835	3.64078	3.28938	3.08356	3.7201	4.91831	3.97583	4.9769	4.14478	4.14228	3.5244	4.90082	5.18612	3.70426	4.18426	3.44331
NM_016343	CENPF	Homo sapiens centromere protein F, 350/400ka (mitosin) (CENPF), mRNA.	2.48334	3.27e-18	5.38079e-14	3.85938	4.44652	3.7543	3.78491	3.88542	3.90705	4.04092	3.65456	3.67823	3.92234	4.22617	2.39969	2.72106	2.67226	2.61079	2.62004	3.80667	2.7835	2.34783	2.41447	2.39958	2.2933	2.33519	3.46658	2.98483	2.39471	2.64023	2.47999	2.28885	2.37616	2.53603	3.11377	2.44596	3.64843	3.09927	2.99314	2.58296	2.75127	2.74987	3.27386	2.74989	3.11259	3.1637	2.64269
NM_018204	CKAP2	Homo sapiens cytoskeleton associated protein 2 (CKAP2), transcript variant 1, mRNA.	2.4644	2.96e-22	4.87068e-18	4.86906	5.73203	5.19252	5.10984	5.54691	5.36485	5.6262	3.98241	4.47796	4.86272	5.16535	4.32645	5.04824	3.99257	4.55977	5.30874	5.73976	5.04319	3.94652	3.8518	3.84633	3.8988	3.58328	4.39445	4.0954	2.13475	4.96857	4.15764	4.29329	4.77469	4.36527	4.0759	4.27849	4.84611	4.28449	4.50243	4.39302	4.2182	3.97981	4.96762	5.18225	4.57395	4.98235	4.2076
NM_012112	TPX2	Homo sapiens TPX2, microtubule-associated, homolog (Xenopus laevis) (TPX2), mRNA.	2.45674	1.57e-18	2.58344e-14	5.52825	5.72766	5.05021	5.25102	4.92371	4.90262	5.78081	4.4308	4.68101	4.23009	4.38854	3.43081	4.77531	3.42114	3.61681	5.07721	4.87686	4.88047	3.49845	4.06684	4.16468	3.67652	4.21797	5.19262	5.39368	3.0566	4.49439	2.962	3.43824	4.00319	3.64285	3.00206	3.73313	5.05463	4.26215	4.78215	4.08473	4.59547	3.72405	4.56475	4.84136	4.62919	5.86448	4.6234
NM_138555	KIF23	Homo sapiens kinesin family member 23 (KIF23), transcript variant 1, mRNA.	2.45609	2.7e-21	4.44285e-17	4.43175	4.35117	3.95706	4.09173	4.08304	4.0954	4.21839	3.95952	3.96124	4.31531	4.59506	3.13192	3.53769	2.98885	3.0692	3.72909	3.5863	3.78661	2.91285	2.79176	3.06019	2.83216	3.27326	3.7913	3.91163	2.86745	3.31119	3.27777	3.08197	3.50696	3.34821	3.13426	2.82399	3.61801	3.08703	3.33363	2.99751	3.40893	3.07818	3.42255	4.01205	3.4316	4.22936	3.42255
NM_001034	RRM2	Homo sapiens ribonucleotide reductase M2 polypeptide (RRM2), mRNA.	2.44782	1.31e-13	2.1556e-09	7.69586	7.69617	7.25808	6.98539	6.52071	5.27682	7.90826	5.37124	3.97124	5.4228	5.19755	3.69856	6.78977	4.35328	5.29877	7.10614	7.21052	7.30392	3.85058	6.63483	6.19932	4.54627	5.9491	6.8178	7.0384	3.48842	6.5023	4.12976	5.2452	7.82673	6.88169	4.96793	5.56017	8.12566	6.90226	6.79116	5.38163	6.32532	4.49494	7.46954	7.54112	7.36519	7.06193	6.63054
NM_003667	LGR5	Homo sapiens leucine-rich repeat-containing G protein-coupled receptor 5 (LGR5), mRNA.	2.44635	1.44e-09	2.36952e-05	4.32949	5.72111	5.15338	5.44462	3.95104	4.53904	4.42607	4.09978	4.24147	4.62942	4.73794	3.7079	4.44983	3.71799	3.46245	4.72613	4.17006	4.61583	2.95182	3.05439	3.80179	2.61564	2.83922	2.51029	2.33119	2.61109	2.66791	2.34572	3.95649	2.93404	2.63298	4.11759	3.70912	3.78749	3.52838	4.01621	5.15683	4.20498	3.42182	4.38815	4.63585	4.68049	4.04433	4.20762
NM_000089	COL1A2	Homo sapiens collagen, type I, alpha 2 (COL1A2), mRNA.	2.43731	2.68e-14	4.40994e-10	8.77291	9.17781	8.70755	8.35819	10.1654	9.68816	8.52527	8.25518	8.02594	8.27133	8.20887	7.87031	7.49371	7.21301	7.92499	8.28417	8.88789	7.56605	7.94874	7.81545	7.16565	7.83233	7.48112	8.6858	8.58848	6.33415	9.04147	8.74659	8.58768	6.94089	7.95723	7.09001	7.78558	7.85603	7.77755	8.34319	9.02913	7.84262	8.43521	7.34118	7.69161	7.84542	8.2932	6.93921
NM_031966	CCNB1	Homo sapiens cyclin B1 (CCNB1), mRNA.	2.43702	8.26e-22	1.35918e-17	6.28366	7.19003	6.37371	6.44663	5.6982	5.71269	6.81673	4.428	5.33988	5.41755	4.7341	4.18538	5.59312	5.33225	5.34349	6.63094	5.7987	5.49486	4.00291	6.01619	5.62432	5.39065	5.24512	6.64597	5.85698	3.92434	6.16517	3.33845	5.17691	4.51892	4.77771	4.10603	4.673	6.97575	5.41825	6.57355	5.82652	6.0328	4.91538	6.54257	6.40223	5.45505	5.40628	4.80802
NM_006101	NDC80	Homo sapiens NDC80 homolog, kinetochore complex component (S. cerevisiae) (NDC80), mRNA.	2.42918	1.48e-22	2.43534e-18	2.34872	2.76192	2.60155	2.44117	2.77144	2.46801	2.71983	2.37204	2.54701	3.27747	3.5949	1.67657	2.01416	1.40597	1.43977	1.85353	2.11933	2.20692	1.42736	1.74926	1.58895	1.64185	1.7167	1.89513	1.60893	1.36339	1.74806	1.98283	1.69978	2.14061	1.81196	2.63546	1.62762	2.06711	1.67257	1.77452	1.56684	1.81491	1.60928	1.98723	2.19581	1.79974	1.84529	1.4187
NM_003878	GGH	Homo sapiens gamma-glutamyl hydrolase (conjugase, folylpolygammaglutamyl hydrolase) (GGH), mRNA.	2.42566	2.67e-14	4.39348e-10	4.228	4.27816	4.27552	4.32846	4.46288	3.97552	4.83532	3.60514	4.38228	5.73914	3.79439	3.40116	3.58254	3.23521	3.82478	3.5863	6.51278	3.27349	3.21289	3.88989	3.36993	3.11415	3.63844	3.99661	3.00898	2.58103	3.74703	3.50166	3.315	3.73355	3.75142	3.48979	4.39177	3.95005	3.24269	4.06654	3.3774	3.24502	2.88811	4.47172	5.10303	3.65169	5.23422	3.02525
NM_005084	PLA2G7	Homo sapiens phospholipase A2, group VII (platelet-activating factor acetylhydrolase, plasma) (PLA2G7), mRNA.	2.41859	1.81e-13	2.97836e-09	5.28353	6.31652	6.4514	5.09294	6.70682	4.00985	6.53989	4.42401	3.94313	4.84936	4.03592	4.41032	5.02921	4.12585	4.40758	7.42039	6.85598	5.38582	3.96953	5.58408	6.09068	4.93527	5.28578	6.01378	5.3321	2.71275	5.13859	3.10838	4.43778	5.57801	4.59349	4.6166	4.52994	6.28611	3.54217	5.31577	4.12689	4.38571	3.32007	5.96337	5.92123	4.81593	4.53878	4.59924
NM_003521	HIST1H2BM	Homo sapiens histone cluster 1, H2bm (HIST1H2BM), mRNA.	2.41811	3.22e-12	5.29851e-08	9.22615	10.4357	8.78817	8.92458	7.52554	6.92668	10.1121	6.98915	7.01723	7.16544	7.45931	7.39655	7.81475	6.11606	6.51632	10.2561	9.64165	7.42055	6.79728	7.74137	8.51258	6.18656	7.03218	7.02703	7.47574	5.62872	9.18972	5.46715	7.53441	9.30589	8.60888	8.06369	7.34054	9.29268	7.73944	9.25923	9.27646	8.67858	8.53222	8.11193	9.16903	8.90809	10.5643	10.6335
NM_152311	CLRN3	Homo sapiens clarin 3 (CLRN3), mRNA.	2.40471	2.05e-07	0.00337327	3.77769	4.0134	3.78717	5.53084	3.87988	3.40756	3.69017	3.89324	3.14697	3.82338	4.69875	3.63834	6.87644	3.38594	2.53385	4.97692	5.27351	7.10989	2.69593	3.00609	2.29936	2.51936	2.86543	4.44344	3.72507	2.65592	3.22018	2.56123	2.77083	1.96455	4.14103	2.51831	1.88177	2.40048	2.46568	2.02567	1.89862	2.75679	2.19424	2.50684	3.28715	5.98941	4.06095	2.651
NM_003537	HIST1H3B	Homo sapiens histone cluster 1, H3b (HIST1H3B), mRNA.	2.3975	9.55e-15	1.57145e-10	8.3443	8.45247	8.21769	7.72929	7.13231	6.47017	8.31187	6.79106	6.78661	5.92686	5.67181	5.68698	6.56083	5.35827	4.66244	7.0222	7.83974	7.09973	6.45203	7.57302	7.58371	4.24565	6.61124	7.46778	6.23713	3.79688	7.05484	5.09208	4.90267	7.04744	8.17222	7.24873	7.33936	8.26601	7.57176	8.25022	6.96763	6.72889	6.51174	7.61128	8.67825	8.71165	6.64487	7.03713
NM_005192	CDKN3	Homo sapiens cyclin-dependent kinase inhibitor 3 (CDK2-associated dual specificity phosphatase) (CDKN3), mRNA.	2.3906	4.28e-16	7.04274e-12	4.02424	3.68137	3.7281	3.41528	4.00659	3.66569	3.92995	3.36403	3.05288	4.61536	3.68246	3.34868	4.68955	3.44448	3.639	4.15604	5.37753	4.85577	2.95494	4.20401	3.61966	3.61371	3.52231	4.18391	3.73358	3.00503	3.14819	3.5196	2.89223	3.80864	4.05494	4.15667	4.28349	3.53695	3.36891	3.85543	3.31873	3.44986	3.03485	4.25687	4.86391	3.44933	5.35075	3.56083
NM_000090	COL3A1	Homo sapiens collagen, type III, alpha 1 (Ehlers-Danlos syndrome type IV, autosomal dominant) (COL3A1), mRNA.	2.37848	1.32e-13	2.17206e-09	8.16262	8.78404	8.3214	8.27726	10.3723	9.28297	8.02378	8.1574	7.7776	8.09025	8.29271	7.43217	7.06108	7.00917	7.34939	7.93769	8.43826	7.17902	7.3448	7.21312	7.04366	7.29738	6.81357	8.77187	8.06899	5.54768	8.28733	8.30357	8.3551	7.0094	7.53592	6.88531	7.47744	7.88719	7.81584	7.83375	8.564	7.17794	8.21304	7.08742	7.26593	7.38627	7.57324	6.32499
NM_001786	CDC2	Homo sapiens cell division cycle 2, G1 to S and G2 to M (CDC2), transcript variant 1, mRNA.	2.37458	2.01e-17	3.30746e-13	3.85879	3.17435	3.27653	3.0091	3.26743	2.92396	3.59106	3.173	3.21563	3.4138	3.43765	1.57829	1.90909	1.6731	1.73548	2.04204	2.44162	2.2871	1.64122	2.02534	1.76504	1.67295	2.05651	2.90423	1.93518	1.50968	1.8559	1.98699	1.57701	2.0218	2.23893	2.57535	2.27373	2.7681	2.13826	2.41794	1.87958	2.13308	2.09095	2.42418	3.33171	2.02534	3.5764	1.69525
NM_004237	TRIP13	Homo sapiens thyroid hormone receptor interactor 13 (TRIP13), mRNA.	2.37277	5.34e-17	8.78697e-13	4.76882	4.63332	4.42239	4.45956	4.30126	4.06112	4.74918	4.10468	4.58338	5.03806	4.57888	3.60837	3.91264	3.13998	4.16104	4.17025	4.34789	4.015	3.23583	3.90276	3.6633	3.62791	3.16185	4.82876	3.56566	3.3393	4.32749	3.37828	3.38539	3.55176	3.5228	3.50147	3.81139	4.50178	3.44772	4.42319	3.84329	4.0025	3.79537	3.37835	3.69932	3.49965	4.07235	3.26572
NM_002988	CCL18	Homo sapiens chemokine (C-C motif) ligand 18 (pulmonary and activation-regulated) (CCL18), mRNA.	2.36873	2.99e-08	0.000492005	5.82911	7.78869	4.51327	5.3839	10.0229	4.98821	6.10017	3.87921	3.67278	5.38298	4.77273	4.35544	6.07397	2.81833	3.1922	8.30305	7.5156	6.7653	4.03104	6.13677	3.86145	2.27158	5.40799	8.0939	5.34406	2.92099	6.19009	4.76921	6.62584	7.37797	7.1514	6.66583	4.2781	4.78895	2.85506	4.49607	4.53472	3.57487	4.00636	6.38409	7.26281	6.82206	5.97142	5.94457
NM_012310	KIF4A	Homo sapiens kinesin family member 4A (KIF4A), mRNA.	2.36355	3.52e-17	5.79216e-13	4.5714	4.61805	3.98695	4.37811	4.40156	4.25657	4.70477	4.67492	3.86609	4.95922	5.30713	3.65207	3.95427	3.65475	3.43174	4.10943	4.01498	4.30467	3.13902	3.21621	3.13699	3.08543	3.69523	4.20061	4.35225	2.93795	2.92463	2.96787	2.79397	3.08766	3.23986	4.31199	3.51926	3.66903	3.75492	3.80281	3.50552	3.27273	3.40002	3.63715	3.93128	3.38104	3.51037	3.2827
NM_016027	LACTB2	Homo sapiens lactamase, beta 2 (LACTB2), mRNA.	2.36208	2.43e-17	3.99857e-13	3.8218	4.02591	4.15126	4.06158	4.11164	4.08881	4.0883	3.41475	4.03452	5.12092	3.98184	3.62286	4.58514	3.23415	3.89667	3.78082	3.75574	4.52187	3.70324	3.51332	3.699	3.95643	3.63335	3.77513	3.70481	2.50478	3.69904	3.11186	3.33954	3.72676	4.05329	3.52315	3.79348	3.55545	3.23882	3.86463	3.59935	4.10347	2.89456	3.48263	4.16047	3.0475	3.02661	2.84987
NM_012101	TRIM29	Homo sapiens tripartite motif-containing 29 (TRIM29), mRNA.	2.34717	1.52e-12	2.50116e-08	5.47543	5.09002	4.79452	5.07192	4.74647	4.89907	4.98198	5.05705	4.79218	5.47419	5.60267	4.02305	4.2017	4.04504	4.14109	3.95908	3.90225	4.07507	3.89991	3.93166	3.95048	3.81141	3.6932	4.49718	3.90941	4.11684	3.66752	3.46947	3.16717	3.37363	3.3869	4.08216	4.27549	4.59448	4.12503	4.52983	4.60747	5.31947	4.61132	3.63211	3.9936	3.86861	3.96895	4.23559
NM_003546	HIST1H4L	Homo sapiens histone cluster 1, H4l (HIST1H4L), mRNA.	2.3447	3.42e-11	5.62761e-07	6.32116	6.75767	6.04921	4.59415	5.13527	4.93105	6.57043	4.69609	3.90516	5.6744	4.83599	3.99904	5.47958	2.64712	5.04525	5.079	5.54339	6.27631	3.67895	5.29314	5.64588	4.92452	5.26129	6.80401	3.447	3.04916	3.52766	3.15918	3.0815	4.83003	6.07778	4.40294	5.86405	5.42506	4.00612	4.80966	3.9996	4.57425	4.41779	5.11728	6.33277	6.02261	5.40472	5.5597
NM_017680	ASPN	Homo sapiens asporin (ASPN), mRNA.	2.34152	1.94e-10	3.19227e-06	5.77184	8.47892	5.9901	6.49228	9.43926	8.17448	6.85243	4.89145	5.33474	6.43393	4.62496	4.86033	5.54743	4.76653	5.38797	5.6625	7.3194	5.69437	4.46364	5.32107	4.43066	5.55607	4.86609	6.83351	5.83239	2.28559	5.69888	7.10296	6.88163	4.47297	6.6686	4.72365	6.82771	3.13487	3.77683	5.20272	5.47435	4.39802	5.36658	3.52617	4.66267	4.27775	4.66886	2.63992
NM_018131	CEP55	Homo sapiens centrosomal protein 55kDa (CEP55), mRNA.	2.33935	2.98e-18	4.90359e-14	3.5939	3.89329	3.65134	3.32176	3.53724	3.03774	3.98599	3.43303	2.90324	3.76402	3.90923	2.47249	2.78138	2.43275	2.4696	2.71754	2.78203	3.12227	2.18852	2.37806	2.73588	1.86882	2.43345	2.74943	2.63335	2.14727	2.71855	2.35582	2.30485	3.04017	2.73454	3.21126	2.93392	3.51691	3.1381	3.46185	3.14643	3.20304	2.8544	2.85731	3.07203	2.44685	2.27328	2.36723
NM_003247	THBS2	Homo sapiens thrombospondin 2 (THBS2), mRNA.	2.32888	2.76e-14	4.54158e-10	6.23384	6.98932	6.87122	6.63897	8.04907	7.38099	6.72543	5.8704	5.84174	6.55333	6.02179	6.16348	5.36176	5.31909	5.98485	5.37113	6.53823	5.51177	5.60474	5.61486	5.05695	5.55661	5.61696	5.97943	5.94034	4.8931	6.70216	5.73463	5.96044	4.60526	5.84486	4.767	5.40728	5.42613	5.18253	5.52185	6.06577	5.79999	5.88959	5.18466	5.12157	4.90472	5.58235	5.14117
NM_145061	C13orf3	Homo sapiens chromosome 13 open reading frame 3 (C13orf3), mRNA.	2.31731	3.33e-18	5.47951e-14	3.57246	3.67427	3.28655	3.32988	3.0597	3.21472	3.9934	3.3902	3.00517	3.34	3.40952	2.36122	2.71638	2.30105	2.52057	2.81312	3.43841	2.75812	2.12428	2.19468	2.17744	2.09579	2.21826	2.61667	2.40455	2.13896	2.02447	2.05058	1.76868	2.13828	1.76763	2.28941	2.21235	2.45725	2.19296	2.54383	2.15003	2.43652	2.00842	2.36964	2.56316	2.38024	2.86842	2.37419
NM_006479	RAD51AP1	Homo sapiens RAD51 associated protein 1 (RAD51AP1), mRNA.	2.31498	6.23e-17	1.02515e-12	4.72493	5.4294	4.57946	4.54907	4.98421	4.03923	4.5931	4.29498	3.90064	4.86997	4.7055	2.72043	2.70342	3.15872	3.05246	4.08572	4.10041	3.41158	2.31006	3.19982	3.53598	3.00097	2.94306	4.76136	3.84827	2.63311	4.28451	3.46423	3.76964	4.59093	3.69117	3.51132	3.5168	3.44031	3.11842	3.8436	3.33848	4.05044	3.1946	4.21533	4.24861	3.68196	4.89899	3.28125
NM_007086	WDHD1	Homo sapiens WD repeat and HMG-box DNA binding protein 1 (WDHD1), transcript variant 1, mRNA.	2.2973	3.82e-25	6.28581e-21	4.03081	4.37953	4.01271	4.11684	3.99946	4.12139	4.47122	3.6024	3.92584	4.32538	3.96962	2.48387	2.68179	2.16849	2.72322	2.86654	2.81526	2.7389	2.445	2.82864	2.92384	2.72338	2.613	3.20877	3.78025	2.5434	2.9811	2.42985	2.42736	2.66998	2.49777	3.23201	3.32496	3.3705	3.28908	3.831	3.58994	3.51766	3.20626	3.33574	3.29217	2.81673	3.01023	2.81673
NM_002774	KLK6	Homo sapiens kallikrein-related peptidase 6 (KLK6), transcript variant A, mRNA.	2.27752	6.67e-07	0.0109755	5.196	4.44595	4.44642	4.60497	4.51174	4.68501	4.57927	4.97719	4.62945	4.24372	4.61153	3.40192	3.03333	3.14283	3.00286	2.8865	3.80052	3.3507	3.48493	2.97382	3.10134	3.16752	3.41207	3.31764	3.88541	4.05997	3.10045	3.07087	3.43805	3.43805	3.20078	3.64528	3.07615	3.09233	3.09836	2.6148	2.80849	4.65526	3.12653	3.34597	2.84317	3.35745	4.34132	3.35745
NM_006361	HOXB13	Homo sapiens homeobox B13 (HOXB13), mRNA.	2.27262	8.17e-08	0.00134437	3.69155	3.30214	4.12452	4.75073	3.9852	4.74929	4.01535	4.35795	3.74348	4.28619	5.16883	2.5082	4.73557	3.26332	3.28134	4.76221	3.09001	5.39187	3.14189	2.53588	2.7508	2.54071	2.19227	3.71994	3.31071	2.78551	3.60927	4.10003	3.04145	3.24005	3.85046	4.13781	2.69073	2.57498	2.5004	2.69935	2.93075	2.85174	1.88452	3.21699	3.45108	5.51324	6.051	3.69866
NM_018685	ANLN	Homo sapiens anillin, actin binding protein (ANLN), mRNA.	2.27258	3.34e-17	5.49597e-13	4.76069	5.49704	4.49353	4.73056	4.5443	4.97136	4.69734	4.00325	4.06398	3.9863	4.23508	3.2634	3.69248	3.29237	3.41778	4.20685	4.46996	3.78152	3.12701	3.68858	3.56159	3.13329	3.29629	4.4289	4.23487	2.83968	4.0387	3.07508	3.03012	3.51436	3.4677	2.96186	3.38007	4.58237	4.10772	4.22488	3.41608	4.32058	3.49442	4.15083	4.78341	3.81061	4.32762	3.72726
NM_018193	FANCI	Homo sapiens Fanconi anemia, complementation group I (FANCI), mRNA.	2.26793	1.63e-19	2.68217e-15	4.26011	4.48352	4.43017	4.1568	3.94224	4.29798	4.26023	3.22746	4.1688	4.41739	5.00343	3.10359	2.74775	2.82091	3.18112	2.86446	2.73242	2.51853	3.10252	3.25934	3.25169	3.55518	3.23271	3.90969	3.44905	2.5167	3.44791	2.83952	3.06208	2.47053	2.59484	2.45757	2.92542	4.14276	3.70725	4.04129	3.40572	3.42184	2.92141	3.18297	4.06475	2.76627	2.53684	2.53194
NM_018454	NUSAP1	Homo sapiens nucleolar and spindle associated protein 1 (NUSAP1), transcript variant 2, mRNA.	2.26062	8.1e-20	1.33286e-15	4.34156	4.92874	4.59914	4.36165	4.30082	3.61619	4.4909	3.72936	4.10258	3.83588	4.17861	2.45831	3.12786	2.73553	2.75509	3.37945	3.63363	3.27803	3.01017	3.55342	3.45742	3.2152	3.62233	3.98686	3.36997	2.3978	2.97385	2.74798	2.9367	3.58604	3.10194	2.82059	3.3806	4.42739	3.69919	4.1394	3.52719	3.53821	3.10547	4.0066	4.56328	3.88223	3.6425	3.56359
NM_003981	PRC1	Homo sapiens protein regulator of cytokinesis 1 (PRC1), transcript variant 1, mRNA.	2.25289	3.75e-20	6.17062e-16	5.16349	5.18776	4.93799	4.91174	4.6365	5.01061	5.37531	4.5537	4.63209	4.65997	5.15019	3.54052	4.38896	3.74482	3.70979	4.31333	4.58693	4.45747	3.68054	4.0062	3.82565	3.73252	3.79854	4.845	4.74939	3.01404	4.26815	3.98081	3.60848	4.07441	3.88245	3.3248	4.23072	4.98735	4.37495	4.83828	4.09215	4.20172	4.03841	4.39614	5.25111	4.66231	5.09503	4.36745
NM_198490	RAB43	Homo sapiens RAB43, member RAS oncogene family (RAB43), mRNA.	2.24867	1.01e-22	1.66195e-18	6.21695	6.53609	6.53311	5.97162	6.11863	6.41869	5.96521	6.21298	6.13412	5.88387	6.46214	5.45797	5.59225	5.57265	5.26229	4.63642	5.46462	5.32805	4.52413	5.34752	4.85146	5.08521	5.00803	5.08036	5.13439	4.19413	4.80002	3.989	4.21342	4.07309	4.94681	4.52498	5.5921	5.80568	5.0034	5.43745	5.53241	5.18642	4.83989	4.90162	5.1381	4.58174	4.84764	4.28239
NM_001276	CHI3L1	Homo sapiens chitinase 3-like 1 (cartilage glycoprotein-39) (CHI3L1), mRNA.	2.22885	5.13e-12	8.44142e-08	5.81815	5.28334	5.95761	5.1976	7.36632	5.36331	6.34659	5.25141	5.00598	5.84692	5.44624	4.43781	4.83614	4.31297	4.72418	4.73667	5.34595	5.10842	3.58749	4.67811	4.11458	3.75122	5.15069	4.44227	4.70634	4.17526	5.00071	3.85607	4.10876	3.94305	3.99978	3.90465	3.65888	4.69532	3.78104	3.33705	3.84072	4.3107	3.78104	3.63839	4.7327	4.68056	4.47694	4.84223
NM_018099	MLSTD1	Homo sapiens male sterility domain containing 1 (MLSTD1), mRNA.	2.22378	4.44e-15	7.30602e-11	4.59744	7.14311	5.23391	5.74635	6.65557	5.14826	5.51632	4.14571	5.08163	5.60662	5.08704	3.68554	4.95446	3.24858	3.60133	4.90966	4.48952	4.90447	3.47215	3.44045	3.79149	3.32436	3.92017	5.04522	4.59537	2.71501	4.94273	3.87132	4.83067	4.25799	4.12294	3.51186	4.04041	3.7815	3.43095	3.80191	4.60617	4.23597	4.17122	3.72727	4.28533	4.59731	4.11183	3.64378
NM_004523	KIF11	Homo sapiens kinesin family member 11 (KIF11), mRNA.	2.22054	3.02e-19	4.96941e-15	3.19754	3.69123	3.11432	3.30025	3.00672	2.98886	3.77389	2.79927	2.85626	3.14868	3.18537	1.60404	1.97102	1.61672	1.65208	1.88432	1.9383	2.06169	1.54952	1.79715	1.86679	1.89938	1.76077	2.00771	1.86562	1.63518	2.07669	1.44589	1.43968	1.93057	1.51262	2.05471	2.38316	2.91727	2.37846	2.81357	2.34108	2.38264	2.22927	2.35197	2.71308	2.01642	2.31533	1.65466
NM_002994	CXCL5	Homo sapiens chemokine (C-X-C motif) ligand 5 (CXCL5), mRNA.	2.21953	1.86e-08	0.000306063	8.8485	7.55091	8.12738	6.71736	6.59103	6.87248	7.89802	7.2581	6.53247	7.45316	6.33303	5.70765	6.70959	5.44122	5.85138	7.00984	5.95856	7.18804	5.09853	7.20112	6.39289	5.36269	5.79498	8.55989	6.9431	5.41728	8.52132	5.91665	6.07295	6.31986	6.87811	6.18702	6.54194	7.56897	5.8545	7.15023	6.05846	6.06681	6.45367	7.25942	8.80282	7.47201	8.15104	7.88206
NM_022346	NCAPG	Homo sapiens non-SMC condensin I complex, subunit G (NCAPG), mRNA.	2.21481	9.03e-20	1.48589e-15	4.29249	4.77355	4.11182	3.89054	3.87426	3.80438	4.22809	3.62034	3.58237	4.0183	3.66712	2.86829	2.84699	2.87763	2.98707	3.45779	3.5121	3.32236	2.40815	2.98296	3.02729	2.66648	2.60994	3.95923	3.3039	2.40927	3.34844	2.88386	2.6928	3.07557	2.48561	2.54051	2.97861	4.06027	3.07607	3.84125	3.13447	3.006	3.09147	3.53204	3.76242	3.10335	3.4508	2.90657
NM_001274	CHEK1	Homo sapiens CHK1 checkpoint homolog (S. pombe) (CHEK1), mRNA.	2.21132	2.32e-20	3.81756e-16	4.40915	5.20877	4.14198	4.53765	4.3809	4.10823	4.63539	3.30151	3.95686	4.44334	3.86346	3.10398	3.81899	3.18479	3.6361	3.86149	4.03778	3.85973	3.28574	3.51551	3.53991	3.7078	3.11229	4.43791	3.31197	2.85709	3.62491	2.97063	2.99727	3.14246	2.67506	2.79709	3.17347	3.8604	2.63419	4.3661	3.97707	3.92954	3.35461	3.73182	4.26746	3.20127	3.85554	3.16372
NM_018689	KIAA1199	Homo sapiens KIAA1199 (KIAA1199), mRNA.	2.20852	1.15e-12	1.89233e-08	4.68113	4.59045	4.53781	4.61997	4.64907	4.42983	4.48669	5.00947	4.52335	4.3434	4.94176	3.77766	3.5788	3.59248	3.46328	3.49078	3.65151	3.40694	3.3039	3.2775	3.22042	3.16286	3.78256	3.05028	4.08073	3.67611	3.90336	2.88115	2.78266	3.01253	3.02186	3.00393	3.17032	3.20832	3.17994	3.19201	3.18876	3.25267	3.55168	3.21226	3.19912	3.4676	3.59564	3.40757
NM_004370	COL12A1	Homo sapiens collagen, type XII, alpha 1 (COL12A1), transcript variant long, mRNA.	2.20325	2.91e-12	4.78841e-08	5.83096	8.14167	5.75497	6.73986	8.2448	7.12377	6.05526	5.02126	5.92164	6.05764	5.97842	5.27937	4.88563	4.60032	5.13222	5.3194	5.25066	5.05954	5.09016	4.82135	4.49883	4.8874	4.26419	5.33867	6.14414	3.98883	6.60715	5.61587	6.86645	4.25059	5.09556	4.41327	5.13698	4.64354	4.86704	5.0474	5.67869	4.8814	8.14627	4.80638	5.08336	4.80739	5.43936	4.16215
NM_017779	DEPDC1	Homo sapiens DEP domain containing 1 (DEPDC1), mRNA.	2.20013	3.02e-15	4.96941e-11	2.95239	3.74105	3.09671	3.00253	2.9967	3.15706	3.47096	3.01783	2.66702	3.21733	3.79534	1.41261	1.55088	1.25676	1.45291	2.13162	2.0015	1.8727	1.50301	2.62703	2.32767	1.85714	1.65741	2.89202	2.39201	1.77864	2.35877	1.79335	2.25482	2.01426	1.32804	1.67527	1.26195	2.38776	1.72834	1.57813	1.94929	1.89079	1.44602	3.55812	2.74669	2.12518	2.09788	0.823195
NM_001711	BGN	Homo sapiens biglycan (BGN), mRNA.	2.20008	2.16e-13	3.55428e-09	7.40775	7.47743	7.21407	6.92826	9.05769	8.10073	7.53264	7.00084	6.92962	7.4292	7.1139	7.10294	6.45056	6.36786	6.84388	6.80595	7.50132	6.59888	7.41934	6.08594	5.69083	6.5174	6.67077	6.82558	6.17912	5.85852	6.69054	6.39501	6.38036	5.68676	6.67434	5.78364	6.79759	6.50662	6.02554	6.62767	6.65641	6.55716	6.37029	6.0406	6.47029	6.27815	6.72884	6.29622
NM_145307	PLEKHK1	Homo sapiens pleckstrin homology domain containing, family K member 1 (PLEKHK1), mRNA.	2.19738	1.14e-18	1.87587e-14	2.84117	2.96599	2.78889	2.76222	2.73738	2.55844	2.75986	2.50896	3.04371	3.4814	3.80683	1.69177	1.67473	1.68639	1.80021	1.87831	1.89345	1.72749	1.81334	2.00515	1.9551	1.84998	2.02203	2.27332	2.0838	1.96302	1.62505	1.59899	1.62263	1.47074	1.6651	2.26698	1.91007	2.2902	2.12488	2.19098	2.22386	2.12547	2.20067	2.10515	2.05133	2.48681	2.45161	2.05133
NM_002639	SERPINB5	Homo sapiens serpin peptidase inhibitor, clade B (ovalbumin), member 5 (SERPINB5), mRNA.	2.19696	1.99e-10	3.27454e-06	3.56716	4.14903	3.14531	4.93919	3.37699	3.27601	3.2984	3.5711	3.332	4.24989	3.5307	2.47708	4.49018	2.42036	2.86172	4.00291	4.28539	4.38582	1.8052	2.6305	2.10972	2.6385	2.19428	2.29005	3.2291	2.04398	4.40842	2.57331	2.74175	2.22027	3.90616	2.08923	3.45124	3.04019	2.34578	3.29512	3.95637	3.54143	2.68886	2.26226	2.89949	4.86778	2.70741	2.29341
NM_001986	ETV4	Homo sapiens ets variant gene 4 (E1A enhancer binding protein, E1AF) (ETV4), transcript variant 1, mRNA.	2.1924	8.1e-14	1.33285e-09	5.2885	5.51109	5.61179	5.90958	5.36387	5.34948	5.45371	5.65698	5.53732	5.55945	5.92094	4.64408	5.13271	4.83418	4.97152	4.57424	5.10858	4.78557	3.90257	4.41313	4.50398	4.42302	4.14794	3.96854	4.95442	4.25504	4.17294	4.10121	4.2365	4.26306	4.0874	4.13648	4.23558	4.61	4.66743	4.72149	4.78507	4.59226	4.39981	3.81072	4.44915	4.2272	6.30093	4.3625
NM_001944	DSG3	Homo sapiens desmoglein 3 (pemphigus vulgaris antigen) (DSG3), mRNA.	2.18551	3.27e-08	0.000538078	3.2324	3.15888	2.90326	3.27215	3.32442	2.94288	3.31986	3.40639	3.06873	3.37178	3.30684	3.542	4.2276	3.05148	3.34862	3.36344	4.61819	4.21983	2.33297	2.12918	2.20346	2.63758	2.34271	2.46843	2.42676	2.66136	1.98308	1.90749	2.03782	1.82215	1.81278	2.63323	2.11465	2.27123	2.43306	2.47235	2.44061	2.97155	2.6457	2.1772	2.57076	3.90271	2.89715	2.50652
NM_007231	SLC6A14	Homo sapiens solute carrier family 6 (amino acid transporter), member 14 (SLC6A14), mRNA.	2.17752	3.14e-08	0.000516687	6.4209	6.48672	6.02885	6.09914	3.61005	3.82389	6.10135	3.61497	3.57481	4.42054	3.40993	2.2314	4.3608	2.58384	2.70544	6.10204	2.6499	4.3823	2.34009	3.87405	2.63635	2.33171	3.17106	2.70657	6.50045	1.8609	6.58962	3.46393	4.12746	3.75406	3.84216	2.9444	4.33691	4.3034	3.35802	5.88206	3.82066	3.34282	2.29388	4.89217	5.96509	4.33079	3.88708	3.41892
NM_032043	BRIP1	Homo sapiens BRCA1 interacting protein C-terminal helicase 1 (BRIP1), mRNA.	2.17662	4.81e-18	7.91486e-14	3.53019	4.06457	3.53024	3.75611	3.2679	3.33205	4.00908	3.36914	3.41724	3.80172	4.06711	2.54169	2.72318	2.38508	2.59482	2.80475	2.72392	2.85186	2.29034	2.30903	2.53492	2.36481	2.2855	2.88236	3.69186	2.06133	2.49417	2.11943	2.3053	2.35591	2.03557	2.68254	2.45023	2.60081	2.90231	3.12858	2.60008	2.87628	2.50775	2.5139	2.86752	2.71691	3.12722	2.5139
NM_001071	TYMS	Homo sapiens thymidylate synthetase (TYMS), mRNA.	2.1761	2.38e-20	3.91629e-16	5.90024	5.90259	5.45538	5.77228	6.14943	5.45171	6.19544	5.09368	4.42348	5.64657	4.87408	4.35764	5.71073	4.37417	4.4828	5.29482	5.40766	5.34707	3.99201	5.08659	4.82951	4.39984	4.55876	5.49393	5.24657	3.87562	4.64194	4.37774	4.28896	4.77808	5.50155	4.39097	5.48872	5.2553	4.82068	5.52251	4.81727	5.04846	4.35408	5.4279	5.90717	5.21428	5.14016	5.02809
NM_002543	OLR1	Homo sapiens oxidized low density lipoprotein (lectin-like) receptor 1 (OLR1), mRNA.	2.17349	4.03e-12	6.63136e-08	4.17009	3.71572	4.23112	3.79785	3.81603	3.86136	3.75116	3.97759	3.15195	4.74224	4.62984	2.79982	3.10267	2.94214	2.78501	2.88803	3.19783	2.7683	2.70918	2.73511	2.57939	3.11538	2.73665	3.17491	3.208	2.87786	2.19995	2.30254	2.27734	2.45858	2.17927	2.45086	2.31505	2.61757	2.4147	2.67395	2.29761	2.45953	2.52387	2.44956	2.76344	2.34797	3.05776	2.22373
NM_001211	BUB1B	Homo sapiens BUB1 budding uninhibited by benzimidazoles 1 homolog beta (yeast) (BUB1B), mRNA.	2.16595	6.02e-19	9.90591e-15	3.18825	3.15013	2.98167	2.9649	2.89982	2.77183	3.13303	2.69392	2.56557	3.94222	4.08739	2.20052	2.33426	2.12243	2.02043	2.2418	2.56123	2.44888	2.39315	2.13037	2.25185	2.27522	2.15245	2.45905	2.33708	2.03818	1.79327	2.06921	1.82626	2.00645	2.07136	2.54284	2.37853	2.68985	2.471	2.58133	2.22267	2.35903	2.60091	2.40486	2.81001	2.36634	3.17313	2.40486
NM_016448	DTL	Homo sapiens denticleless homolog (Drosophila) (DTL), mRNA.	2.14452	2.19e-19	3.60365e-15	5.12759	5.6742	4.94666	5.24334	4.94386	4.80864	5.21061	4.29266	4.62157	4.67444	4.82306	3.52962	4.05792	3.48014	3.35817	3.98714	4.02906	4.01751	3.12033	3.39188	3.57016	3.08549	2.99839	3.65384	3.87089	3.06667	3.62747	3.5998	3.40435	3.54159	3.31751	3.6911	3.47855	4.48253	4.17143	5.05007	4.38082	4.3186	3.38084	4.04486	4.17965	3.93467	4.16932	3.80823
NM_004004	GJB2	Homo sapiens gap junction protein, beta 2, 26kDa (GJB2), mRNA.	2.14413	4.14e-16	6.81237e-12	5.90589	5.2316	5.22243	5.56806	5.27953	4.85439	5.6363	5.04142	5.47927	5.70329	5.244	3.7013	5.07475	4.37497	4.31933	4.69812	5.05017	5.28135	3.7969	4.05857	4.12676	4.0198	3.92949	4.25765	3.94356	3.83547	4.37483	4.5052	5.42758	4.89854	4.82513	5.02085	5.29205	4.99974	5.00026	5.23656	4.93303	4.50499	4.94908	5.08285	5.67267	5.14038	4.69831	4.7109
NM_004336	BUB1	Homo sapiens BUB1 budding uninhibited by benzimidazoles 1 homolog (yeast) (BUB1), mRNA.	2.14317	1.92e-18	3.15936e-14	4.58346	5.05036	4.69402	4.61726	4.4031	4.33589	4.82771	4.42556	4.39661	4.38045	4.52138	3.25475	3.41152	3.20181	3.03146	3.4947	3.60426	3.59269	2.5851	3.31936	3.26546	2.95516	2.8973	3.95157	3.51289	3.07774	2.98264	2.44297	2.54465	2.98348	2.93275	3.1313	2.70511	3.91405	3.16523	3.22109	2.90137	3.20086	2.99322	3.77202	3.89631	3.66658	3.68689	3.44986
NM_018063	HELLS	Homo sapiens helicase, lymphoid-specific (HELLS), mRNA.	2.141	3.73e-20	6.13772e-16	3.18987	3.07664	3.1034	2.91452	2.89282	2.59755	3.04451	2.63686	2.92038	3.57329	3.04647	1.78977	1.91505	1.71312	1.878	2.33238	2.33937	1.83253	1.86834	2.08416	2.12922	1.9288	2.12897	2.05851	2.28603	1.98404	1.71987	1.91936	1.75212	2.04971	1.84514	2.53082	2.50843	2.49825	2.37783	3.14715	2.46021	2.28936	2.3439	2.95415	2.87788	2.49952	2.55682	2.18325
NR_003105	ZWILCH	Homo sapiens Zwilch, kinetochore associated, homolog (Drosophila) (ZWILCH), transcript variant 2, transcribed RNA.	2.12397	1.85e-18	3.04418e-14	3.94122	3.9461	3.85954	3.86371	3.78184	3.7694	4.09562	3.2312	3.50685	4.35144	3.68863	2.67684	2.62381	2.72314	2.88751	2.87556	3.1185	2.88171	2.17343	2.43417	2.42143	2.67817	2.63972	2.78511	2.5303	2.19483	2.87748	2.67421	2.41344	2.63321	2.30561	2.80394	2.82839	2.93069	2.64048	3.10938	3.0702	2.84661	2.479	2.98516	2.51351	2.48093	2.75834	2.16104
NM_014736	KIAA0101	Homo sapiens KIAA0101 (KIAA0101), transcript variant 1, mRNA.	2.12283	4.2e-13	6.9111e-09	4.87749	5.1915	4.66065	4.75598	4.96828	3.06629	5.68321	3.43393	3.23359	5.33213	2.93844	2.77622	3.92006	2.49968	3.22302	5.25125	6.12885	4.32451	3.51863	4.67711	5.09541	4.23834	4.23856	5.65149	5.12842	2.96074	4.32868	3.4232	3.54211	4.49387	4.63678	2.92309	3.94134	4.60007	2.79304	5.10777	3.35889	3.68241	2.44692	5.25561	5.9274	4.09528	4.8014	4.07972
NM_212482	FN1	Homo sapiens fibronectin 1 (FN1), transcript variant 1, mRNA.	2.11833	2.85e-09	4.68967e-05	8.24118	10.8851	8.03683	8.65862	11.0008	9.8782	8.63713	6.34523	7.63515	8.56302	7.11965	7.52097	7.32648	7.24547	7.84013	7.95181	8.37827	7.54101	7.33537	7.64978	6.4211	7.61066	7.21368	8.02231	7.18648	4.24447	7.99037	8.00858	9.04153	6.05176	8.23094	6.9043	7.85445	6.9817	6.54533	7.43528	8.57831	7.46237	10.2025	6.42926	7.01434	6.05048	9.04605	6.70051
NM_002546	TNFRSF11B	Homo sapiens tumor necrosis factor receptor superfamily, member 11b (osteoprotegerin) (TNFRSF11B), mRNA.	2.1173	4.18e-12	6.87819e-08	4.44142	4.44326	4.51861	4.504	4.26103	4.61789	4.56366	4.75506	4.58979	4.07657	4.65925	3.40311	3.47777	2.95315	3.30504	3.37504	3.64205	3.27912	2.21233	2.75961	2.47341	2.70924	2.91251	2.82443	2.53104	2.68623	2.49544	2.4168	1.98318	2.41829	2.13513	2.81697	1.8355	1.99035	2.29581	2.39272	2.41298	2.34463	2.26051	2.85843	2.75893	2.20389	4.21473	2.56046
NM_000584	IL8	Homo sapiens interleukin 8 (IL8), mRNA.	2.11717	1.81e-08	0.000297835	8.79815	7.24029	8.10488	5.83279	8.07242	8.71885	7.89457	7.4037	6.06018	8.99844	5.42708	4.75953	6.25191	5.37724	7.27822	6.83664	8.83083	6.69219	4.49282	5.86034	5.16199	7.01675	7.49631	8.62263	8.92899	4.7778	9.84365	7.05725	4.58138	5.42278	6.32676	5.6821	5.34664	6.33875	4.68422	7.97408	6.9287	4.94349	5.85174	5.2067	7.78304	5.33146	7.90947	5.36144
NM_007127	VIL1	Homo sapiens villin 1 (VIL1), mRNA.	2.11666	8.26e-10	1.35918e-05	5.31729	6.56835	5.11404	6.49633	5.36415	5.28561	5.55748	5.18855	5.03997	5.66163	5.39067	4.64405	7.53373	4.30086	4.61649	5.29153	5.15617	7.89674	3.99284	4.27251	4.2703	4.36832	3.96085	5.52268	5.15513	4.55626	4.71024	3.49002	5.13529	3.7995	4.87615	4.17997	4.38186	4.89012	4.80296	5.14785	4.72797	5.54875	5.26684	4.09785	4.76112	7.38134	6.23314	4.42921
NM_003645	SLC27A2	Homo sapiens solute carrier family 27 (fatty acid transporter), member 2 (SLC27A2), mRNA.	2.11189	1.05e-12	1.72778e-08	4.24628	4.482	4.54793	4.95828	5.10366	4.16102	5.17951	3.73093	3.24714	4.1137	3.54621	3.83631	4.91118	2.75832	3.13299	3.69535	3.3836	5.38312	3.53101	2.99678	3.33946	3.19967	3.11351	3.40076	5.0459	2.55397	6.135	2.29882	3.11633	2.83045	3.00591	3.01384	2.70953	3.21024	3.00017	3.89186	4.56733	3.38341	2.51839	4.05524	4.37364	5.11352	4.25784	3.0034
NM_003118	SPARC	Homo sapiens secreted protein, acidic, cysteine-rich (osteonectin) (SPARC), mRNA.	2.10795	2.27e-12	3.73529e-08	8.85253	9.56628	8.87958	8.99606	11.3685	10.0565	8.7792	7.50659	8.43289	9.4897	8.43673	9.03023	8.25316	7.91846	8.77621	9.05506	9.72372	8.53746	9.18187	8.74471	8.32879	8.70498	8.39695	9.36606	9.46242	5.14054	9.72567	8.23962	9.2307	7.94335	8.96482	7.55958	8.5778	8.1021	8.02558	8.62426	9.42353	8.37047	9.04701	8.21545	8.42166	7.89604	8.52538	7.2722
NM_006845	KIF2C	Homo sapiens kinesin family member 2C (KIF2C), mRNA.	2.10463	4.03e-17	6.63137e-13	4.35932	4.51064	4.28167	4.37312	4.01443	4.11192	4.43129	4.15813	4.39272	4.42907	4.55328	2.67854	3.02024	2.80573	2.85745	2.90277	3.19842	2.99348	2.73936	3.00568	2.65864	2.62303	2.65849	3.14441	3.2254	3.00799	2.68174	2.45116	2.35571	2.65732	2.49199	3.00735	2.74157	3.46262	3.12738	3.06278	2.83978	3.1152	2.89821	2.81225	2.83289	2.79591	3.35484	2.70023
NM_005733	KIF20A	Homo sapiens kinesin family member 20A (KIF20A), mRNA.	2.10073	2.42e-18	3.98211e-14	3.92208	4.3464	4.01743	3.91739	3.87368	3.7821	4.07829	3.94058	3.82121	4.29039	4.39372	2.56311	3.08981	2.77366	2.59151	2.91248	2.95423	3.17097	2.64205	2.93824	2.69819	2.73523	2.60538	3.18329	2.80035	2.68229	3.1158	3.18515	2.89758	3.33027	3.04095	3.0052	2.74093	3.5708	2.88056	3.2767	3.10489	3.00903	2.94917	3.86436	3.34718	3.41012	4.14066	3.56782
NM_002203	ITGA2	Homo sapiens integrin, alpha 2 (CD49B, alpha 2 subunit of VLA-2 receptor) (ITGA2), mRNA.	2.09332	1.35e-17	2.22143e-13	6.52731	6.28834	5.85945	6.08201	5.39169	5.52559	5.66245	4.11598	4.92602	5.76539	5.20261	4.09266	5.21687	4.41168	4.58082	6.16622	4.56668	5.37959	3.79674	4.35747	4.23557	4.51334	4.34457	4.34264	5.1244	3.15009	5.58313	3.90308	5.0483	3.96984	4.00037	4.09734	4.68922	5.97711	4.65086	6.2584	5.43303	4.96102	4.60041	5.52939	5.66738	5.51873	4.58953	4.50076
NM_002192	INHBA	Homo sapiens inhibin, beta A (activin A, activin AB alpha polypeptide) (INHBA), mRNA.	2.09269	1.47e-12	2.41889e-08	5.10789	5.33504	5.47568	5.17808	5.96622	5.48423	5.5154	5.2746	5.06914	5.97391	6.01896	3.98435	3.6729	3.4745	4.16965	3.82592	4.59487	4.10072	4.24433	4.31106	4.03522	3.67174	4.54865	5.41054	4.51563	4.23786	4.19066	4.30997	4.23297	3.50032	3.84971	3.94201	3.99447	4.06296	3.96756	4.31522	4.22338	4.26248	4.81625	4.34591	4.01417	4.16655	4.1887	3.93493
NM_006332	IFI30	Homo sapiens interferon, gamma-inducible protein 30 (IFI30), mRNA.	2.08729	2.56e-12	4.21248e-08	8.86596	8.72973	9.43645	8.3441	9.56154	8.04116	9.24404	7.11282	8.5957	9.39778	7.77757	8.48807	8.86712	8.46045	8.44583	8.80686	8.9354	8.86833	8.83625	9.18694	8.50601	8.25756	8.89369	9.0088	7.97455	5.04621	7.54246	6.38535	7.9511	8.35688	8.10441	7.3585	7.3585	9.54886	7.67945	8.91104	8.6611	8.56154	5.95621	8.43235	9.58115	8.78016	8.0251	7.98342
NM_000029	AGT	Homo sapiens angiotensinogen (serpin peptidase inhibitor, clade A, member 8) (AGT), mRNA.	2.08575	4.41e-13	7.25666e-09	5.70876	6.07813	5.95595	5.79704	6.32206	5.31835	5.75797	5.6662	5.11805	6.10686	6.20746	4.99246	5.6327	4.67255	4.84263	6.01404	5.48617	5.53561	4.59233	5.23507	5.03746	5.0483	5.27437	4.68117	5.55228	4.84984	6.01144	4.56858	4.25369	4.90085	4.79626	4.895	4.9741	5.11037	5.08011	4.94813	5.09263	5.00966	4.35806	4.81539	5.06643	5.23584	7.87162	5.06643
NM_001238	CCNE1	Homo sapiens cyclin E1 (CCNE1), transcript variant 1, mRNA.	2.07963	1.47e-09	2.41889e-05	5.27012	5.35517	5.04403	5.23142	4.81817	5.47808	5.4716	5.12028	5.20162	5.44416	5.46892	3.96479	4.01977	3.71004	3.36897	4.41384	4.47723	4.19835	3.95667	4.2222	4.29977	3.75961	4.23037	6.50734	4.75239	3.61375	4.17728	4.35608	3.72959	4.05082	4.10212	3.54439	3.93325	4.39459	4.33477	4.32255	3.83147	4.93774	4.05766	4.19018	4.43218	3.98752	6.22717	4.05379
NM_024094	DCC1	Homo sapiens defective in sister chromatid cohesion homolog 1 (S. cerevisiae) (DCC1), mRNA.	2.0796	4.88e-19	8.03004e-15	2.64833	3.39726	2.71153	2.59692	2.83316	2.70197	2.92947	2.37029	2.6344	3.66425	3.79141	2.02605	1.7569	1.97192	2.12758	2.0168	2.19072	1.86718	1.96316	2.14957	2.1308	1.99587	2.299	2.30614	2.09886	1.85055	1.8083	1.71736	1.50034	1.56698	1.40678	1.80293	2.21428	2.21108	1.79837	2.1035	1.98928	1.96427	1.95541	1.91296	2.25457	1.79018	1.68889	1.47986
NM_003641	IFITM1	Homo sapiens interferon induced transmembrane protein 1 (9-27) (IFITM1), mRNA.	2.07936	1.04e-10	1.71132e-06	7.43872	8.01563	8.32818	7.38046	9.0674	7.95053	7.56319	6.40656	6.94298	8.37726	6.94	7.63797	8.78295	8.14522	7.60181	7.45658	8.60996	8.84368	7.89828	7.61698	7.25694	7.2626	8.26222	7.35366	7.4375	4.7337	7.47966	6.33788	6.94717	7.4508	8.73945	7.23362	7.99644	7.52557	7.06627	7.02736	7.57822	7.01246	6.32544	7.0378	8.21698	6.96606	5.80587	7.17258
NM_002445	MSR1	Homo sapiens macrophage scavenger receptor 1 (MSR1), transcript variant SR-AII, mRNA.	2.0759	1.48e-11	2.43534e-07	5.26014	5.76625	6.2507	4.61069	8.06804	5.77379	5.43444	4.78327	4.5598	6.33174	4.20608	4.04758	3.97526	3.90664	4.20989	4.51324	5.93154	3.86453	3.84974	4.15412	4.51269	4.26494	4.63331	5.86747	4.12827	2.41798	3.82527	4.3608	4.27733	4.6962	4.55902	4.473	4.93446	3.93918	2.84416	4.01842	3.66583	3.44184	3.29812	4.33265	4.41505	3.52438	4.03809	4.08328
NM_005325	HIST1H1A	Homo sapiens histone cluster 1, H1a (HIST1H1A), mRNA.	2.06969	1.26e-08	0.000207333	6.87039	6.98202	6.19962	6.57903	6.13525	6.31053	6.95356	5.42543	5.82173	5.98112	5.96506	5.15513	4.44307	5.20086	5.74004	6.37845	5.84338	5.01261	5.50417	5.02973	5.53144	5.81381	4.43613	7.09517	5.57922	4.99954	7.04691	5.33937	5.47555	5.55273	5.36849	4.66084	5.35228	5.40204	5.8185	6.72155	5.85629	7.19747	6.24122	5.27881	5.90145	4.6207	7.48078	5.3251
NM_004900	APOBEC3B	Homo sapiens apolipoprotein B mRNA editing enzyme, catalytic polypeptide-like 3B (APOBEC3B), mRNA.	2.06748	1.91e-12	3.1429e-08	3.00905	3.00793	2.97315	2.36073	2.73996	2.64996	3.03491	2.64656	3.05316	4.97761	4.62517	2.91252	2.59103	2.8817	2.66802	3.32119	3.58263	3.6859	2.70481	2.79999	3.44269	2.86544	3.805	4.23654	2.92852	3.09169	2.0335	2.24051	1.89274	2.10664	2.07895	2.6441	2.64678	2.00514	1.98562	2.2528	2.11486	2.37112	2.0108	4.00127	3.89176	3.96294	4.23224	3.43735
NM_000047	ARSE	Homo sapiens arylsulfatase E (chondrodysplasia punctata 1) (ARSE), mRNA.	2.06125	6.05e-10	9.95527e-06	5.16483	5.45946	5.77255	5.47024	5.12315	5.2269	5.03016	4.73757	5.48248	5.31494	4.88792	4.69034	5.43643	4.67958	5.35139	4.8066	4.33799	5.0421	4.01582	4.42364	4.15328	4.68893	4.32044	4.7954	4.64364	4.14995	3.85255	3.84818	5.556	3.9087	3.91405	4.88579	4.90619	5.75697	4.5087	5.23707	5.49075	5.39742	4.03494	5.03971	4.75981	5.01706	6.78215	4.50897
NM_001511	CXCL1	Homo sapiens chemokine (C-X-C motif) ligand 1 (melanoma growth stimulating activity, alpha) (CXCL1), mRNA.	2.05986	5.3e-09	8.72115e-05	7.53041	7.09468	7.62232	6.15421	7.27374	7.03901	7.50495	6.66145	6.10232	8.69755	6.22246	5.42685	7.03899	4.7747	5.8578	7.52141	8.78363	6.75286	5.3131	6.13502	6.01633	5.74801	7.6661	7.14482	6.73496	5.60635	8.12228	5.06816	5.89825	7.05819	5.71452	6.10815	6.12697	6.36002	5.26792	6.61434	6.51108	5.83227	4.36217	6.8168	8.04133	6.31327	7.50195	7.08833
NM_130398	EXO1	Homo sapiens exonuclease 1 (EXO1), transcript variant 2, mRNA.	2.05969	3.35e-17	5.51243e-13	4.75443	4.93393	4.50052	4.63255	4.27402	4.37178	5.22823	4.55111	4.37734	4.84383	4.32159	3.15048	3.55745	2.98052	3.39701	3.74059	3.93792	3.52961	2.71077	3.24467	3.1249	2.95133	2.65725	3.49234	3.82569	3.18106	3.66822	2.83435	2.93068	3.15224	2.98249	3.41843	3.37917	4.23443	3.57488	4.37623	3.97416	3.80667	3.32124	3.62041	3.84922	3.76479	4.03902	3.63163
NM_002345	LUM	Homo sapiens lumican (LUM), mRNA.	2.05279	9.98e-10	1.64221e-05	6.52485	8.37938	8.14947	8.127	10.3719	8.77832	7.64808	5.45648	6.06397	8.63429	5.72629	7.46226	6.43651	7.20354	7.42886	7.56351	9.12637	6.6804	6.63326	7.59953	6.54757	6.91616	6.96359	7.45561	7.40361	2.77668	7.31674	8.60191	7.73858	6.70017	8.37541	5.95986	7.32053	5.12621	4.44001	6.54435	6.84432	6.10059	5.18809	6.83264	7.18688	6.141	5.56696	5.48348
NM_020401	NUP107	Homo sapiens nucleoporin 107kDa (NUP107), mRNA.	2.05152	2.91e-18	4.78841e-14	5.61146	6.77972	6.33579	6.42115	5.81275	6.47042	6.62992	4.16799	5.64205	5.88914	5.17986	4.61979	4.30457	4.27454	5.0036	4.84145	4.57313	4.43723	4.61414	4.74742	4.85975	5.05364	4.984	5.01369	5.41052	2.80501	5.15364	3.89254	5.03339	4.19097	4.08014	4.22475	5.39117	5.55574	5.10671	6.16326	5.88772	5.78874	5.30756	4.74582	4.85235	3.94108	4.05337	3.60972
NM_024017	HOXB9	Homo sapiens homeobox B9 (HOXB9), mRNA.	2.05042	2.87e-11	4.72258e-07	5.12474	5.0879	5.0723	5.18777	4.76312	4.91029	5.17873	5.5732	4.99747	5.37771	5.20438	4.42561	4.67398	4.5374	4.64641	4.2531	5.21199	4.70665	4.32368	4.03791	3.89169	3.90697	3.89381	3.79021	4.00285	4.68437	3.93047	3.88651	3.55119	3.47407	3.76745	4.16935	3.34302	3.56761	3.48445	3.53533	3.62411	3.53912	3.56628	3.56505	3.47038	4.11362	3.89031	3.64244
NM_014812	CEP170	Homo sapiens centrosomal protein 170kDa (CEP170), transcript variant alpha, mRNA.	2.04742	2.88e-13	4.73904e-09	5.35789	6.08287	5.53525	4.85938	6.55084	5.77445	5.25001	4.15161	4.77954	6.05377	5.26081	3.13987	3.22068	3.40917	3.57007	3.65569	4.50126	2.9433	3.57484	3.95101	3.91949	3.98139	4.21795	4.85259	4.59939	3.49945	4.2755	3.99214	4.30479	3.68661	3.72263	3.5307	4.20976	4.38147	3.72682	4.54613	4.37306	4.1991	4.75532	4.52578	4.03067	3.92681	3.23	2.73128
NM_147781	CTSB	Homo sapiens cathepsin B (CTSB), transcript variant 3, mRNA.	2.04275	1.48e-15	2.43534e-11	8.96499	9.41779	9.53714	9.04695	10.4495	9.31681	9.27577	7.80295	8.35643	9.93613	8.10902	8.16544	8.80668	8.61699	8.61525	9.10269	9.07177	8.91536	8.34022	9.0166	8.48443	8.24656	8.6916	9.01883	8.6217	4.75307	8.2919	7.44792	8.81757	8.41962	9.02289	8.16656	8.75606	8.92257	7.86043	8.68755	8.97565	8.55888	7.76584	8.56963	8.77501	8.72701	7.88066	8.05891
NM_002417	MKI67	Homo sapiens antigen identified by monoclonal antibody Ki-67 (MKI67), mRNA.	2.03498	2.17e-16	3.57074e-12	5.21947	5.44269	4.66744	5.00421	4.66925	4.36102	5.35714	4.61331	4.50458	4.23671	4.68351	3.07497	4.64703	3.38769	3.38196	4.34967	4.66544	4.53693	3.20208	3.78546	3.88362	3.45703	3.6232	4.55947	4.66206	3.42136	3.66308	3.40657	3.18864	4.04572	3.57643	3.51674	3.46598	4.54517	4.25237	4.14725	3.43413	4.11591	3.49598	4.39562	4.67733	4.40753	5.37753	4.38417
NM_005030	PLK1	Homo sapiens polo-like kinase 1 (Drosophila) (PLK1), mRNA.	2.03087	1.14e-17	1.87587e-13	6.27342	5.83853	5.62807	5.48736	5.3574	5.36845	6.30674	5.26924	5.18028	5.64783	5.87315	4.66307	5.77987	4.7847	4.92433	5.68785	5.00411	5.83912	4.38532	4.857	4.71066	4.09722	4.27671	4.95534	5.07972	3.88704	5.07329	4.75063	4.66909	4.88868	4.75386	4.2626	4.64634	5.87679	5.35398	5.81192	5.23973	5.37397	5.00694	5.16003	5.8386	5.4457	6.68194	5.465
NM_001255	CDC20	Homo sapiens cell division cycle 20 homolog (S. cerevisiae) (CDC20), mRNA.	2.03082	9.43e-14	1.55171e-09	5.70969	6.07513	5.62483	5.25924	5.41079	4.9536	4.94166	5.19432	4.51529	5.4133	4.9283	4.14672	5.22604	3.65248	2.90378	5.6936	4.42026	4.30127	1.6974	5.53571	3.75483	3.35742	4.00177	4.80058	4.70209	4.42009	3.33596	4.09985	2.76817	2.30031	2.87959	3.74454	3.52958	5.54841	3.76369	4.65627	4.92898	5.19476	3.97074	5.05523	4.8812	5.24854	6.07601	3.63462
NM_020890	KIAA1524	Homo sapiens KIAA1524 (KIAA1524), mRNA.	2.0303	4.71e-18	7.75031e-14	2.48821	3.44422	2.59883	2.56314	2.55291	2.70901	3.03271	2.41661	2.41075	3.16761	3.49915	1.6377	1.48526	1.5283	1.57134	2.00666	2.04368	1.71509	1.41788	1.63127	1.63898	1.6513	1.32823	2.57757	2.12627	1.59386	2.09792	1.6261	1.74103	1.80304	1.72228	2.13233	2.05111	2.29729	2.20758	2.46841	2.20803	2.10018	2.32924	2.52481	2.16307	1.92309	2.29901	1.60532
NM_004963	GUCY2C	Homo sapiens guanylate cyclase 2C (heat stable enterotoxin receptor) (GUCY2C), mRNA.	2.0261	6.03e-07	0.00992237	3.26184	3.31028	3.27898	4.14257	3.40604	3.34477	3.36496	3.30051	3.24098	3.56863	3.84697	2.94935	5.98647	2.82904	3.17117	3.49706	4.12713	6.09278	2.46487	2.27866	2.20346	2.71267	2.46868	4.34435	3.05952	2.57269	3.45739	2.24863	3.16325	1.93907	2.93995	2.48368	2.4021	2.06058	2.35341	2.19121	2.04944	2.59943	2.73535	2.14692	2.27178	5.72702	3.96012	2.16455
NM_003979	GPRC5A	Homo sapiens G protein-coupled receptor, family C, group 5, member A (GPRC5A), mRNA.	2.02296	3.65e-14	6.00607e-10	7.89688	7.03426	7.27963	6.7749	6.21049	6.48185	7.08781	6.30042	6.47254	7.25453	5.97565	5.80147	6.2666	6.13578	5.70596	6.36606	5.82531	6.56237	6.16544	5.92162	6.20443	5.4033	7.46074	6.20906	7.49145	4.39238	6.65097	4.09216	5.59863	4.39376	5.56025	4.71617	5.7363	7.12438	5.64694	7.32547	6.66228	6.81336	4.55837	5.7883	6.4274	6.44322	5.44242	5.95162
NM_017449	EPHB2	Homo sapiens EPH receptor B2 (EPHB2), transcript variant 1, mRNA.	2.02047	8.41e-14	1.38387e-09	5.9199	5.90691	6.18877	6.14657	6.27676	6.10236	6.03653	6.09071	5.88779	6.48225	6.28449	5.1786	6.02375	5.15463	5.03659	5.23207	5.64755	6.11238	4.84826	4.93419	4.93207	4.6703	4.64124	5.24121	4.70022	5.09037	5.19092	4.49556	4.75014	4.61714	5.1624	5.07528	5.13172	5.2179	5.22619	4.90517	5.09092	5.43229	4.96996	4.81687	4.83907	6.1014	4.97094	5.02577
NM_004369	COL6A3	Homo sapiens collagen, type VI, alpha 3 (COL6A3), transcript variant 1, mRNA.	2.01787	7.1e-13	1.16831e-08	7.22256	8.60945	7.52302	7.5772	8.99479	8.47093	7.3558	6.27287	6.60546	6.86462	6.71922	6.57251	6.40304	5.94646	6.84769	6.85614	7.80172	6.47831	6.46516	6.4939	5.4919	6.55855	6.49221	7.30523	6.85062	4.78397	7.49493	7.16989	6.94419	5.31147	7.17495	5.79232	6.57815	5.80548	5.88789	6.15655	6.73218	6.35941	7.90074	6.00231	6.25756	6.18036	6.38979	5.63057
NM_004101	F2RL2	Homo sapiens coagulation factor II (thrombin) receptor-like 2 (F2RL2), mRNA.	2.01305	1.32e-12	2.17206e-08	4.6822	4.54224	3.77825	4.00419	4.75313	4.34656	4.36405	3.98818	3.61227	4.53095	4.70503	2.68788	3.74334	3.35545	3.38579	4.44039	4.20832	3.66728	1.99304	2.9044	2.69733	2.10181	2.0872	2.96907	2.216	2.36944	3.75755	3.1967	3.30988	3.16357	3.31813	3.12549	3.73567	3.63277	2.97792	3.94489	3.72761	3.33859	3.51936	2.97714	3.72548	3.4135	2.75844	2.78793
NM_170589	CASC5	Homo sapiens cancer susceptibility candidate 5 (CASC5), transcript variant 1, mRNA.	2.00439	2.75e-20	4.52512e-16	3.61118	3.77922	3.78967	3.75236	3.60197	3.52185	3.80366	3.32891	3.47533	4.08913	4.07601	2.361	2.83355	2.27787	2.36715	2.65435	2.77441	2.78417	2.36982	2.49872	2.27648	2.22344	2.55097	2.94789	2.56293	2.22344	2.52166	2.1943	2.1765	2.70338	2.34379	2.84312	2.82473	3.16245	2.95591	3.0282	2.68988	3.01401	2.71688	3.15617	3.10029	2.95633	3.33231	2.67371
NM_007036	ESM1	Homo sapiens endothelial cell-specific molecule 1 (ESM1), mRNA.	2.00429	5.57e-10	9.16543e-06	5.16186	4.0906	4.58828	4.66153	4.19059	4.40828	4.53513	5.05486	4.76663	5.09396	5.17634	3.30442	2.89757	3.42483	3.5358	3.03038	3.62052	2.96801	2.96569	3.22236	3.47265	3.26057	3.45069	3.72247	3.69038	3.70922	2.97762	2.98276	2.52973	2.78074	2.70172	3.20811	3.03877	2.88431	3.08654	3.17673	3.0558	3.40691	3.25547	2.59161	2.66923	2.32424	3.25083	2.5765
NM_173596	SLC39A5	Homo sapiens solute carrier family 39 (metal ion transporter), member 5 (SLC39A5), mRNA.	2.0016	2.13e-07	0.00350491	5.36258	5.55147	5.66997	6.90509	5.78769	5.81209	5.85763	5.76026	5.81095	6.01814	6.01903	4.85683	8.15031	4.9209	4.95717	5.2801	5.52771	8.06906	4.56889	4.1999	4.24758	4.78509	4.26178	5.57814	5.00166	4.52967	4.5533	4.54933	5.65802	4.54432	4.69732	4.60488	4.63052	4.60564	4.77873	4.6964	4.6559	4.99454	5.18116	4.19613	4.64159	7.14692	7.37509	4.68412
NM_206963	RARRES1	Homo sapiens retinoic acid receptor responder (tazarotene induced) 1 (RARRES1), transcript variant 1, mRNA.	1.99848	2.02e-10	3.32391e-06	5.38858	5.50055	5.35386	5.42322	8.71701	5.3667	5.28013	5.27495	5.17305	5.81222	6.10016	4.72715	5.42321	4.56315	4.77948	4.50332	6.37733	5.37519	3.87873	4.15781	3.29591	3.85917	4.52842	5.12338	7.27245	4.25411	5.75546	5.42189	4.54829	4.34963	5.4272	4.20488	3.97656	4.1822	4.20138	3.74156	4.15704	4.13619	3.93605	4.26829	3.85433	4.25157	4.4318	4.25237
NM_002901	RCN1	Homo sapiens reticulocalbin 1, EF-hand calcium binding domain (RCN1), mRNA.	1.99519	1.6e-08	0.00026328	7.06663	7.87484	8.16643	7.67692	8.05876	8.48234	7.32464	1.01512	6.17649	6.98402	3.9096	5.7183	5.90738	4.22166	7.30595	6.21585	6.30262	6.94679	6.8942	5.87776	6.54617	7.20392	7.21089	6.91024	7.06609	2.54164	7.4784	7.41994	7.62706	4.04144	3.76754	2.91421	6.03955	5.24621	3.34031	7.17561	7.68256	7.56375	5.97454	7.08923	7.05954	6.49242	2.92103	3.586
NM_002638	PI3	Homo sapiens peptidase inhibitor 3, skin-derived (SKALP) (PI3), mRNA.	1.99421	2.45e-07	0.00403147	7.95965	7.303	7.67797	6.38383	6.37767	5.99657	8.02129	6.07653	5.67272	6.25704	5.86626	4.53284	8.47941	5.49332	4.655	7.57757	8.224	8.38099	4.21651	6.04613	4.38866	4.20558	4.96299	4.93367	5.3963	4.62184	6.59919	5.07333	5.17198	7.36876	6.37872	5.16192	5.7227	7.0575	5.10252	6.86306	5.59399	5.47221	4.15707	5.63494	7.25999	6.71029	8.03928	5.89089
NM_003531	HIST1H3C	Homo sapiens histone cluster 1, H3c (HIST1H3C), mRNA.	1.99302	2.6e-08	0.00042783	8.38564	8.43281	8.07792	7.65443	6.74212	6.46168	8.34519	6.37899	5.9511	6.33383	6.5467	6.40403	7.09123	5.85507	5.68144	8.04189	7.36702	7.09708	5.50853	7.38349	8.21855	4.87693	6.45413	6.97389	6.04978	2.7617	6.79821	5.85127	6.00445	8.70201	8.49089	7.1714	7.88687	8.74837	7.03878	7.04403	6.94113	7.05793	6.57137	8.2674	9.56847	8.96586	8.49849	7.29425
NM_002915	RFC3	Homo sapiens replication factor C (activator 1) 3, 38kDa (RFC3), transcript variant 1, mRNA.	1.99234	2.24e-19	3.68592e-15	5.20423	5.43635	5.3711	5.26135	5.39326	5.28118	5.23155	4.36986	4.60418	5.69674	5.25286	3.71076	4.00448	4.11251	4.08868	4.05027	5.4653	3.77513	3.75972	4.06693	4.03046	3.69317	3.74888	4.34291	4.85158	3.19986	4.54629	4.19096	4.43965	4.15888	4.13211	3.82087	4.69126	4.76284	4.68419	5.42162	4.9914	4.85864	4.43515	4.56027	4.77503	4.60853	4.79521	3.9554
NM_018369	DEPDC1B	Homo sapiens DEP domain containing 1B (DEPDC1B), mRNA.	1.99207	6.54e-15	1.07616e-10	5.24433	5.13917	5.11524	4.76019	4.84932	4.77726	5.06691	5.07402	5.09589	5.3541	5.32093	4.1685	5.09646	4.30451	4.31787	4.55928	4.76248	4.88379	3.38317	4.13707	4.41333	4.03476	3.83414	5.10416	4.4314	3.60292	4.05832	3.88624	4.04578	4.35882	4.24526	3.87772	4.27873	4.95657	4.98059	4.55383	4.23118	4.60091	4.0166	4.38039	4.47563	4.30936	4.76525	4.00404
NM_182470	PKM2	Homo sapiens pyruvate kinase, muscle (PKM2), transcript variant 2, mRNA.	1.99135	5.15e-19	8.47432e-15	8.95926	8.89975	8.39325	8.58694	9.05792	8.84598	8.67221	8.192	8.75192	9.1217	8.11459	7.89992	8.24441	7.73836	7.89605	8.1438	7.92963	8.38732	7.98467	8.19466	7.87682	7.51573	7.60377	7.60187	7.90075	5.82542	8.32352	7.82589	8.24457	8.01056	8.52664	8.05064	8.92221	8.39491	8.33525	8.67054	8.69586	8.72817	8.13927	8.17817	8.31394	8.37667	8.18669	7.94006
NM_022145	CENPK	Homo sapiens centromere protein K (CENPK), mRNA.	1.99047	2.15e-15	3.53783e-11	3.51549	3.74708	3.31879	3.08626	3.76121	2.69265	3.64336	2.89268	3.12369	4.03478	3.66534	1.83251	2.79358	2.0848	2.56669	3.16362	3.39657	2.79043	1.97192	3.12938	2.57513	2.29582	2.25711	3.9149	2.26592	1.74718	2.37207	2.56171	2.11724	3.13089	2.78317	2.4781	2.73921	3.17875	2.72701	2.77253	2.54609	2.48562	2.48038	3.71272	4.1757	3.23869	2.40924	2.43219
NM_018351	FGD6	Homo sapiens FYVE, RhoGEF and PH domain containing 6 (FGD6), mRNA.	1.98758	2.49e-12	4.0973e-08	4.50201	5.91343	4.80705	4.78337	5.91651	6.03795	5.28513	3.65651	4.41707	4.49863	4.49602	2.93016	3.46316	3.37392	3.14766	3.25451	3.71136	3.08644	2.48459	3.49164	3.01492	3.15809	3.04137	4.17458	3.34802	2.41421	3.27545	4.00639	4.06614	3.21071	3.70959	3.44931	3.32739	2.95997	3.318	3.30393	2.68567	3.29967	4.41523	3.85753	4.05389	3.1466	4.80166	2.80164
NM_203394	E2F7	Homo sapiens E2F transcription factor 7 (E2F7), mRNA.	1.98326	8.43e-20	1.38716e-15	4.85563	4.70897	4.57057	4.63927	4.09011	4.2201	4.61361	4.74604	4.33626	4.92444	5.43642	3.65163	3.78514	3.35654	3.4731	3.55963	3.39723	3.58822	3.36501	3.3938	3.44076	3.35853	3.23186	3.20018	3.6996	3.41526	3.4449	3.27051	3.54078	3.79105	3.80185	3.75823	3.43271	3.46295	3.68202	3.57543	3.43493	3.42653	3.71955	3.41749	3.64985	3.70245	4.29662	3.85829
NM_014791	MELK	Homo sapiens maternal embryonic leucine zipper kinase (MELK), mRNA.	1.98197	9.72e-17	1.59943e-12	4.36389	4.22741	3.99926	4.04639	3.91889	3.62141	4.14433	3.47311	3.91947	3.67434	3.3766	2.56872	2.77434	2.47851	2.37879	2.99749	3.256	2.97895	2.54969	2.93871	2.64218	2.48584	2.46254	3.59689	2.9801	2.56567	2.37309	2.25372	2.32307	2.83147	2.54135	2.46284	2.19774	2.81036	2.39038	3.23109	2.42058	2.56339	2.21399	3.29079	3.81075	3.50778	4.10061	2.98897
NM_001147	ANGPT2	Homo sapiens angiopoietin 2 (ANGPT2), mRNA.	1.98024	4.5e-12	7.40475e-08	4.65099	5.34001	5.13816	5.13727	5.87181	5.41706	5.00764	4.50173	4.76955	5.0725	5.13992	4.48166	3.81989	3.74959	4.05865	4.34405	4.6475	4.0435	4.46137	3.61241	3.68401	3.61307	4.26206	3.88538	4.22425	3.42412	5.19935	3.62567	4.13102	3.46399	3.92211	3.38654	3.67099	3.17785	3.44296	3.81088	4.29172	4.01406	3.14175	3.66259	3.49669	3.27621	4.18563	3.23805
NM_014317	PDSS1	Homo sapiens prenyl (decaprenyl) diphosphate synthase, subunit 1 (PDSS1), mRNA.	1.97972	4.95e-16	8.14523e-12	6.79458	6.77852	6.70868	6.82606	6.75952	6.5023	6.87169	6.01583	6.63877	7.50426	6.49299	5.81967	7.31236	5.59249	6.07786	6.48161	6.83408	7.14581	5.673	5.73735	5.70749	5.58954	6.19615	6.25566	5.83628	3.72974	5.96975	5.93608	5.5587	6.07786	5.96169	5.69253	6.11026	5.79698	5.95505	6.21278	5.88453	6.5681	5.88132	6.02286	6.18337	6.75184	6.30581	5.735
NM_000300	PLA2G2A	Homo sapiens phospholipase A2, group IIA (platelets, synovial fluid) (PLA2G2A), mRNA.	1.97815	9.99e-08	0.00164385	7.27678	7.45884	7.71739	6.59718	9.79831	6.34623	6.43717	5.89935	5.74966	7.11168	5.41856	6.65166	8.79021	4.05727	5.07961	6.25143	7.88068	8.99869	6.65857	4.62974	4.18031	5.25167	6.88954	6.60924	5.18295	4.37289	5.87561	7.04397	5.30622	3.9875	5.87785	4.61133	5.07799	5.0591	5.2034	5.03327	5.95749	5.26611	5.68557	4.85308	4.6924	7.61576	5.42288	4.20361
NM_007052	NOX1	Homo sapiens NADPH oxidase 1 (NOX1), transcript variant NOH-1L, mRNA.	1.97686	6.96e-07	0.0114527	3.39901	3.28979	3.14441	3.32799	3.11422	3.26627	3.31638	3.30793	3.38831	3.49239	3.97034	2.30178	2.03264	2.37815	2.12013	2.18608	2.8038	2.43892	2.17747	2.11694	2.1178	2.16193	2.27275	1.95294	1.95826	2.61471	1.92901	1.76462	1.90553	1.85034	1.98513	2.31101	1.76666	1.82289	1.99919	2.09833	1.90133	2.08397	1.8788	1.79342	1.85968	1.84922	2.33227	2.07554
NM_001562	IL18	Homo sapiens interleukin 18 (interferon-gamma-inducing factor) (IL18), mRNA.	1.97681	1.07e-09	1.76068e-05	4.00263	4.22044	4.54788	4.22831	4.27669	4.02314	3.87715	3.74137	3.80302	4.74589	4.06557	4.09465	5.11362	3.85401	4.1481	5.12947	4.93593	5.10557	3.04295	3.5829	3.15877	3.30778	3.82167	3.44891	3.0164	2.64221	4.62563	3.46348	2.88429	5.17334	3.72548	3.40239	3.39208	3.51226	2.61745	3.77754	3.15068	3.13109	2.39767	4.31598	4.80684	3.54392	2.80031	3.41456
NM_020182	TMEPAI	Homo sapiens transmembrane, prostate androgen induced RNA (TMEPAI), transcript variant 1, mRNA.	1.97489	2.11e-14	3.47201e-10	6.68835	6.77994	6.36548	6.67126	7.11831	7.06317	6.75574	6.12211	5.91726	6.68474	6.14988	5.97393	5.94531	5.53438	5.61824	5.44336	6.0064	6.12708	5.80308	5.30463	5.23035	5.03313	5.2868	5.75628	6.85581	5.03313	6.46152	5.91299	6.64184	5.2412	5.46343	5.13542	6.07103	5.52183	5.51488	5.94656	6.0323	5.9985	6.45202	5.24725	5.31828	5.68538	5.72856	5.14446
NM_014109	ATAD2	Homo sapiens ATPase family, AAA domain containing 2 (ATAD2), mRNA.	1.97284	1.18e-19	1.94169e-15	4.47875	4.73441	4.23217	4.46908	4.64411	4.81936	4.6604	3.77837	5.18624	4.77091	4.81724	3.24504	3.15986	3.11171	3.36702	3.13373	3.516	3.336	3.37148	3.34767	3.3728	3.4283	3.3758	3.40161	3.85737	3.0545	3.82142	3.6836	3.45599	3.59757	3.07695	3.18927	4.08239	4.03144	3.65837	4.28475	4.03577	4.1379	3.51603	3.7795	3.7365	3.5828	3.88403	3.18922
NM_002354	TACSTD1	Homo sapiens tumor-associated calcium signal transducer 1 (TACSTD1), mRNA.	1.96955	2.16e-07	0.00355428	6.86797	7.43851	7.55034	7.58613	7.5881	6.64346	7.05077	6.59836	7.64724	8.74179	6.45916	6.00376	8.50814	6.92942	6.82761	7.35142	8.39719	8.70636	5.92417	6.92787	6.96038	6.64289	7.18703	7.80841	6.75457	4.22572	6.44896	5.49863	7.46979	7.3897	6.95806	6.76018	7.2715	7.10663	7.04874	6.78439	6.67296	6.82767	6.3167	7.7558	7.6401	8.64903	7.1262	5.69307
NM_152637	METTL7B	Homo sapiens methyltransferase like 7B (METTL7B), mRNA.	1.96945	3.68e-11	6.05544e-07	5.58154	5.766	5.36104	5.7513	5.81539	5.65606	5.54486	5.43344	5.23982	6.21042	6.10278	5.21953	6.8275	5.23977	4.91098	4.72703	5.23279	6.76213	4.74782	4.73955	4.76723	4.5059	4.96127	5.20933	5.16561	5.15846	4.86305	4.08182	4.72644	4.88197	4.52676	5.1301	5.00862	4.56029	4.96259	5.18821	4.84587	5.01135	4.6704	5.06073	5.22438	6.00158	5.51375	4.64309
NM_198175	NME1	Homo sapiens non-metastatic cells 1, protein (NM23A) expressed in (NME1), transcript variant 1, mRNA.	1.96676	3.32e-17	5.46306e-13	7.67528	7.12259	7.28817	7.05658	7.08241	6.71818	7.23721	6.66174	6.96923	7.96493	6.25586	6.46007	7.34795	6.35095	6.91706	6.67221	7.07078	7.38421	6.44993	7.12202	6.30489	6.28175	7.04845	7.30166	7.27625	3.87102	6.79592	6.00332	6.21278	5.98658	7.38623	5.92858	6.88707	6.94919	6.36463	7.08237	6.77294	6.93246	5.73484	6.45848	6.90535	6.33242	5.47639	5.97105
BC012542	GINS1	Homo sapiens GINS complex subunit 1 (Psf1 homolog), mRNA (cDNA clone MGC:13345 IMAGE:4333095), complete cds.	1.96301	2.48e-19	4.08084e-15	5.63649	5.36391	5.02405	4.99763	4.79338	5.05317	5.50567	4.54371	4.84808	5.50413	5.24296	3.86557	4.40355	3.61445	4.12038	4.07993	4.07066	4.46602	4.14833	4.32844	4.27826	3.95685	3.88241	3.80018	4.33099	3.69595	4.04444	3.59299	3.59228	3.65971	3.81271	4.26398	4.91374	5.24962	4.45247	5.40575	5.07575	5.06705	4.67463	4.52313	5.11172	4.3297	5.04471	4.12955
NM_005556	KRT7	Homo sapiens keratin 7 (KRT7), mRNA.	1.96147	1.09e-08	0.00017936	6.64609	5.98042	6.2735	5.91467	5.53465	5.77395	6.12668	6.40301	6.16783	6.4099	6.4223	5.18901	5.66774	5.14975	5.34367	5.11327	5.1868	5.48213	4.84062	5.36032	5.37306	4.88274	5.48026	5.06579	6.72709	5.1971	6.13884	5.2311	4.35626	4.43836	4.92015	4.9683	5.07308	5.42189	5.01546	5.87705	5.47368	5.96119	4.94427	5.48658	5.40003	5.2139	5.11511	5.70692
NM_003318	TTK	Homo sapiens TTK protein kinase (TTK), mRNA.	1.96025	7.14e-15	1.17489e-10	3.30804	3.74477	3.46285	3.30909	2.90592	2.95498	3.39702	3.22405	3.42136	3.41666	3.23202	1.96968	1.79498	1.61689	1.94029	2.28213	2.7366	1.94385	2.22744	2.05573	2.16768	2.40063	2.0061	2.70059	2.10129	1.55459	2.34033	2.15145	1.95701	2.51905	2.00664	2.0273	2.53931	2.91392	2.68549	2.88415	2.36178	2.69613	2.17405	3.01974	2.74551	2.25839	2.69743	1.96727
NM_012177	FBXO5	Homo sapiens F-box protein 5 (FBXO5), mRNA.	1.95919	2.39e-13	3.93275e-09	4.6698	5.50384	4.85208	4.69198	5.01917	4.59419	4.69791	3.91261	4.52377	5.27547	4.73746	3.87359	4.05619	3.92862	3.873	4.52397	4.39462	4.25951	3.37859	3.77414	3.37236	3.41971	3.42994	3.74936	3.39933	2.60348	3.00639	2.81323	2.43993	3.27742	2.90984	3.78619	3.603	4.27297	3.5722	4.06458	3.80867	3.75808	3.45698	4.72263	4.25508	3.80501	3.61868	3.76688
NM_002658	PLAU	Homo sapiens plasminogen activator, urokinase (PLAU), mRNA.	1.95882	3.12e-17	5.13396e-13	7.15121	6.42879	6.72262	6.44235	6.68791	6.36503	6.81173	6.30562	6.08775	7.74576	6.44644	5.77778	5.82338	5.48236	5.57776	5.64955	5.55378	5.87572	5.72204	5.90034	5.29337	5.45053	5.51747	5.40201	5.80351	5.05952	6.22247	4.56914	5.16962	4.90785	5.7957	5.12198	5.17194	5.48936	5.26344	5.98986	5.489	5.60828	5.00637	5.30031	5.99912	5.44029	6.04215	5.44322
NM_006547	IGF2BP3	Homo sapiens insulin-like growth factor 2 mRNA binding protein 3 (IGF2BP3), mRNA.	1.9583	2.73e-13	4.49221e-09	3.64165	4.17831	4.24488	4.29669	4.02559	3.51501	4.10858	4.48613	4.26856	3.8783	4.29208	2.41913	2.62405	2.29228	2.52159	2.41811	2.98216	2.80183	2.40097	2.58766	2.21327	2.24381	2.68348	2.78773	2.04347	2.62804	1.95824	2.18598	2.16146	2.21982	1.72554	2.37151	2.17238	2.7477	2.26433	2.23703	2.14855	2.28261	2.30893	2.71926	2.41513	2.40961	4.15515	2.77043
NM_000801	FKBP1A	Homo sapiens FK506 binding protein 1A, 12kDa (FKBP1A), transcript variant 12B, mRNA.	1.95753	3.02e-11	4.96941e-07	5.06008	5.45698	5.37021	4.75359	5.92248	4.72896	4.6697	2.70009	5.2923	6.03139	2.72971	3.15409	3.37132	3.6285	3.88179	4.57058	5.05148	3.54333	3.76279	4.49602	4.99342	4.04767	5.00746	4.69942	4.43833	2.40418	5.05145	3.24432	4.82134	4.36146	3.08655	3.97396	5.58186	4.8068	4.05968	5.09824	5.40568	4.80763	3.53186	4.31924	6.13901	2.48752	4.67167	2.03542
NM_080860	RSPH1	Homo sapiens radial spoke head 1 homolog (Chlamydomonas) (RSPH1), mRNA.	1.95157	7.75e-10	1.27526e-05	3.11095	3.3676	3.03055	3.01597	2.98173	3.13212	2.71042	3.31232	2.8648	4.55911	5.25474	2.51547	2.08806	1.96254	1.90713	2.64493	2.13137	1.80993	2.40343	2.08481	2.34742	1.71437	2.3281	2.34559	1.82843	2.43044	1.67124	1.45408	1.83707	2.30584	1.76996	3.16337	3.41954	2.7921	3.10085	3.09143	3.03537	3.42881	3.58837	2.35197	2.06708	2.99697	2.30701	2.57011
NM_021642	FCGR2A	Homo sapiens Fc fragment of IgG, low affinity IIa, receptor (CD32) (FCGR2A), mRNA.	1.95063	2.68e-11	4.40994e-07	8.04927	8.5145	8.43156	7.37896	9.87077	8.11626	8.23695	5.91212	6.4852	8.56822	6.08926	7.2817	7.40273	6.66933	7.75092	8.77646	8.70791	7.41949	7.0332	7.68532	8.06945	7.74597	8.24011	8.15936	7.54549	4.90423	7.27371	6.30649	6.42356	7.28113	6.92168	6.77536	7.44076	7.58612	6.09962	7.53683	8.16676	7.43778	6.24425	7.28503	7.89273	6.20339	6.32033	6.77985
NM_001010932	HGF	Homo sapiens hepatocyte growth factor (hepapoietin A; scatter factor) (HGF), transcript variant 3, mRNA.	1.94832	8.94e-10	1.47108e-05	5.07911	5.26401	4.89727	3.83815	6.1047	4.85821	5.40188	3.9952	4.14224	4.13006	3.99659	3.39892	2.57143	3.28064	4.01099	4.38219	3.02627	2.51843	3.77857	2.91537	2.62959	3.2453	3.31916	3.97481	3.67269	2.58696	4.9959	3.6852	3.60754	2.39343	3.34273	3.12543	2.75733	3.24709	3.34422	3.58966	3.48304	2.9887	3.12354	4.5036	4.32789	3.60084	2.79319	1.827
NM_016095	GINS2	Homo sapiens GINS complex subunit 2 (Psf2 homolog) (GINS2), mRNA.	1.94775	4.14e-12	6.81237e-08	5.0028	4.98108	4.80791	4.83399	4.39262	4.71995	5.08679	5.11036	4.54127	4.65338	5.72519	3.17845	4.21221	3.4676	3.10915	3.21089	3.83475	4.15613	3.5624	3.53782	3.16312	3.32735	3.145	3.72845	3.04512	3.32962	2.73265	2.78263	2.99525	3.26736	3.35768	4.08528	3.33278	3.55321	3.53596	3.81948	3.30116	3.68739	3.71738	3.22763	3.21371	3.83765	3.99254	3.23507
NM_018725	IL17RB	Homo sapiens interleukin 17 receptor B (IL17RB), mRNA.	1.94489	1.21e-10	1.99106e-06	4.69505	4.94175	4.60914	4.52416	4.18197	4.28695	4.55103	4.49749	4.88153	4.86019	4.69848	3.91444	3.85708	3.75989	3.83256	3.69051	3.84834	3.88993	3.25425	3.41332	3.40122	3.46316	3.2841	3.7572	3.18665	3.07065	4.18687	3.19883	3.59345	3.39223	3.2553	3.70273	3.72344	4.14134	3.90364	4.16573	3.70975	3.90086	3.97147	3.48847	3.88597	3.64436	3.70168	3.4757
NM_032485	MCM8	Homo sapiens minichromosome maintenance complex component 8 (MCM8), transcript variant 1, mRNA.	1.94454	1.31e-17	2.15561e-13	4.35686	4.66178	4.42378	4.34859	4.52564	4.66061	4.81873	3.91804	4.30718	4.44646	4.43253	2.9174	2.80162	2.6389	2.82143	2.83455	3.04417	2.85537	2.44825	2.5564	2.43807	2.70624	2.45883	2.86064	3.08481	2.29604	2.50977	2.56826	2.5865	2.60928	2.28825	3.02357	3.33237	3.25839	3.61644	3.59281	3.66063	3.94372	3.51048	3.37235	2.95695	2.66381	3.07577	2.39826
NM_017785	CCDC99	Homo sapiens coiled-coil domain containing 99 (CCDC99), mRNA.	1.94338	2.16e-16	3.55428e-12	4.72715	5.55732	5.12085	4.79633	4.54363	4.62757	5.08222	3.38728	4.61446	4.46503	4.36061	2.97142	2.9471	2.99144	3.28117	3.40142	3.20168	2.78962	2.55379	3.24494	3.06009	3.49999	2.57346	3.64003	3.09087	2.02154	3.93514	3.66182	3.3962	3.95356	3.55344	3.21108	3.53327	4.35122	3.75955	4.96369	4.34558	4.2504	3.5195	4.40711	3.83675	3.08623	2.83007	2.4258
NM_001428	ENO1	Homo sapiens enolase 1, (alpha) (ENO1), mRNA.	1.94161	1.54e-17	2.53407e-13	10.5084	10.6918	10.3432	10.2242	10.1704	10.3682	10.3605	8.30637	9.53813	10.1082	8.88637	8.96864	9.48827	9.34014	9.30693	9.12068	9.02258	9.48531	9.04087	9.87822	9.19684	9.12865	8.74132	9.56605	9.21415	6.27046	10.0537	7.57561	9.56736	8.01942	9.1884	7.96409	9.24905	10.3664	9.40269	10.2494	10.1786	10.3094	9.15873	9.06841	9.49456	9.61628	8.19977	8.57356
NM_025130	HKDC1	Homo sapiens hexokinase domain containing 1 (HKDC1), mRNA.	1.93605	2.65e-11	4.36057e-07	4.85959	4.7817	4.67891	5.09424	4.73036	4.67825	4.89693	4.89639	4.73746	5.0155	4.90127	3.86983	6.13575	3.83371	3.88899	4.15161	4.3812	6.19976	3.69489	3.62792	3.42091	3.54594	3.54465	3.93451	3.8564	4.05605	3.36521	3.38602	3.68757	3.28443	3.93527	3.83188	3.64512	3.87379	3.65614	3.65483	3.74025	4.12439	4.47694	3.69937	3.61924	5.18594	4.21214	3.79617
NM_024857	ATAD5	Homo sapiens ATPase family, AAA domain containing 5 (ATAD5), mRNA.	1.93553	2.09e-16	3.4391e-12	3.12652	3.28668	3.04399	2.93903	3.12494	2.95885	3.40669	2.81614	3.05279	3.24131	3.54734	1.87293	2.14481	1.84035	1.81085	1.90093	2.36934	1.98738	1.89502	1.90366	2.03952	1.66553	2.08751	2.28319	2.26197	1.68405	1.90796	2.06349	1.68581	2.1816	1.68052	1.83141	2.20171	2.04762	1.93955	2.39744	1.85339	1.96205	1.87086	2.24762	2.10109	1.89599	2.28661	1.84965
NM_005562	LAMC2	Homo sapiens laminin, gamma 2 (LAMC2), transcript variant 1, mRNA.	1.93485	1.9e-12	3.12645e-08	6.69115	6.76161	6.32913	6.28709	5.18926	6.02212	6.17837	5.42533	5.94569	7.06513	5.90083	4.38734	5.25043	5.06056	4.86974	6.34881	4.74366	5.31764	3.98737	5.46215	4.97534	4.67932	4.94371	4.17916	5.47684	3.91243	5.49887	3.99934	4.01703	4.56169	4.66338	4.82227	5.52135	5.85922	5.3069	6.27859	5.98583	5.64833	4.70854	5.67878	6.28286	5.22535	5.26645	5.29136
NM_000308	CTSA	Homo sapiens cathepsin A (CTSA), mRNA.	1.93433	1.18e-13	1.94169e-09	8.51819	8.51684	8.68443	8.53832	9.35625	8.61383	8.45427	6.87115	8.38872	9.43379	8.00505	8.20031	9.04326	8.18055	7.97715	8.05144	8.17538	9.07016	8.33446	8.32678	8.01141	7.69849	8.08465	7.33635	7.69844	4.75884	7.91706	6.62225	7.9302	8.22953	8.07073	7.64136	8.51657	8.65511	8.07339	8.57789	8.86417	8.59859	7.40324	8.06781	8.42628	8.53537	8.27329	7.76089
NM_000358	TGFBI	Homo sapiens transforming growth factor, beta-induced, 68kDa (TGFBI), mRNA.	1.93417	1.58e-13	2.59989e-09	7.84086	8.57976	7.99884	7.75081	9.22094	8.45889	8.12874	6.65027	7.04716	8.50166	6.64325	6.59026	7.43242	7.00664	7.16316	7.99772	7.54667	7.53521	6.52675	7.40381	7.05118	6.86594	6.86012	7.22067	6.49373	4.25868	7.21696	7.32848	6.92192	6.99888	7.54969	6.68086	7.38438	7.00333	6.12478	6.97396	7.65109	7.05241	7.04221	6.82113	7.34462	7.19411	6.56832	6.3725
NM_018136	ASPM	Homo sapiens asp (abnormal spindle) homolog, microcephaly associated (Drosophila) (ASPM), mRNA.	1.93367	3.3e-18	5.43015e-14	2.83183	3.44132	3.21355	3.07062	3.04269	2.97402	3.07896	2.95748	3.07309	3.27437	3.57243	1.75946	1.90181	1.90261	2.00185	2.04201	2.58476	1.98997	1.99255	1.97934	2.07824	1.94632	1.91496	2.35053	2.47237	2.12244	1.82845	1.67326	1.42436	1.82754	1.66408	2.11497	1.95217	2.60378	2.12279	2.21065	1.98282	2.11834	1.96594	2.39231	2.25709	2.11698	2.39922	1.86732
NM_015441	OLFML2B	Homo sapiens olfactomedin-like 2B (OLFML2B), mRNA.	1.92741	4.58e-12	7.53639e-08	5.23522	5.19014	5.37347	5.22092	6.57141	5.54038	5.18787	5.05849	4.78509	5.59337	5.07617	4.82111	4.69796	4.13607	4.56641	4.9422	5.01859	4.60104	4.85309	4.55444	4.42511	4.28775	4.48823	4.80284	4.51831	4.56576	4.51242	4.59307	4.04273	4.21408	4.4154	5.00664	4.47582	4.36844	4.32899	4.18209	4.44501	4.18725	4.49777	4.3171	4.3171	4.21982	4.11708	4.3171
NM_004591	CCL20	Homo sapiens chemokine (C-C motif) ligand 20 (CCL20), mRNA.	1.92443	2.21e-06	0.0363656	5.7875	6.44201	6.23521	4.95497	5.04216	4.9585	6.19245	4.38545	4.2074	6.63092	4.36076	2.6496	5.28395	3.96719	3.20834	5.61372	8.17374	5.398	3.23091	5.42889	4.95721	3.4846	5.60387	3.99215	4.18472	4.02955	4.34279	3.62044	2.49067	4.25699	4.24445	3.56766	4.74525	4.15901	2.85399	5.16657	2.95894	2.86706	3.08162	6.54725	7.71002	5.35891	8.08152	5.41993
NM_000393	COL5A2	Homo sapiens collagen, type V, alpha 2 (COL5A2), mRNA.	1.92356	1.53e-15	2.51762e-11	6.23217	6.8737	6.36395	6.57699	7.2052	7.00911	6.32256	6.27451	6.42402	6.62052	6.63397	5.52668	5.3574	5.14695	5.52325	5.73098	5.89739	5.31029	5.43243	5.39277	5.26388	5.55614	5.36584	5.85006	6.06286	5.01491	6.15403	5.82841	5.83039	5.22667	5.50084	5.08172	5.5164	5.56895	5.55526	5.69601	6.06403	5.3103	6.32104	5.22127	5.39557	5.14905	5.30957	5.12803
NM_153711	FAM26E	Homo sapiens family with sequence similarity 26, member E (FAM26E), mRNA.	1.92184	2.4e-12	3.9492e-08	4.50693	5.8576	4.73855	5.09316	5.48782	5.11469	5.06608	4.34442	4.44484	4.54318	4.77351	3.84097	2.97045	3.10955	3.96981	3.89919	3.46884	3.33603	3.59115	3.06447	3.20342	3.35239	2.62633	3.45303	3.69622	2.62385	3.4462	3.46893	2.93432	2.4904	2.63306	3.76945	3.2445	2.8943	2.86595	3.16049	3.96036	3.27987	3.11895	4.04112	3.66049	3.41534	3.56931	2.86127
NM_001012410	SGOL1	Homo sapiens shugoshin-like 1 (S. pombe) (SGOL1), transcript variant A2, mRNA.	1.92125	2.35e-16	3.86692e-12	3.8419	4.84353	3.79056	3.8626	3.73877	3.81987	4.70445	4.12314	3.84777	4.08294	4.06414	2.4207	3.08071	2.55191	2.69159	3.43207	3.33478	3.1052	2.91685	2.21737	3.29318	2.48881	2.56871	3.76169	3.14135	2.57663	2.93573	2.14266	2.45655	2.49129	2.67871	1.40478	2.5407	3.30487	3.17959	3.34099	2.65319	2.81483	2.93574	3.55941	4.05709	3.51056	3.16196	3.63512
NM_001306	CLDN3	Homo sapiens claudin 3 (CLDN3), mRNA.	1.92004	3.29e-11	5.4137e-07	6.26537	6.3867	6.55512	6.86238	6.5932	6.48969	6.55017	6.70181	6.3107	6.62064	7.20536	6.06683	7.3215	5.8451	5.89225	5.96619	6.76979	7.62786	5.50347	5.88589	5.48997	5.67788	5.43621	6.08966	6.18239	6.31979	6.57157	5.71976	5.81764	5.44821	5.96216	5.78971	5.74167	5.85761	5.59297	5.99139	5.88001	6.61415	5.93876	5.42948	5.92597	6.95388	6.71214	6.20321
NM_152562	CDCA2	Homo sapiens cell division cycle associated 2 (CDCA2), mRNA.	1.91791	1.69e-18	2.78089e-14	3.94531	4.16841	3.93168	3.94658	3.68143	3.94827	4.27352	3.88931	4.0666	4.71063	4.74751	2.74021	2.89038	2.76923	2.69295	3.30035	3.00136	2.92056	2.97948	3.05494	3.10963	2.83704	2.8319	3.44244	3.19454	2.87873	3.43271	2.56154	2.6826	2.8127	2.86465	3.39037	2.9177	3.06981	3.03729	2.95495	2.88053	3.0189	2.9043	3.25974	3.29526	3.15224	3.15195	3.06724
NM_005322	HIST1H1B	Homo sapiens histone cluster 1, H1b (HIST1H1B), mRNA.	1.91294	2.34e-11	3.85047e-07	7.3311	8.03415	6.89541	6.97156	5.75448	5.37274	8.19377	5.85468	5.05138	5.24907	6.4165	5.76653	5.19409	4.73163	5.19525	7.74434	7.13831	4.96389	5.42619	6.15447	7.25493	4.96117	5.82495	7.60061	5.29549	4.75224	6.15663	5.2539	4.6694	6.53795	5.64698	4.78382	5.75169	7.18834	6.31934	7.01547	6.02047	6.03683	6.16053	6.89561	7.41475	6.17558	7.42891	6.08493
NM_014176	UBE2T	Homo sapiens ubiquitin-conjugating enzyme E2T (putative) (UBE2T), mRNA.	1.91155	5.49e-14	9.03379e-10	5.02666	5.13221	4.52378	4.79935	4.71529	4.22363	4.53172	4.22363	4.06014	4.16289	4.21775	3.77468	5.09885	3.36071	3.81756	4.24843	4.83333	5.1703	3.34866	4.09167	4.09127	3.53384	3.97228	4.41007	3.67076	3.31989	3.95059	2.97832	3.57759	3.96576	4.31883	3.35122	3.4975	4.20044	3.88742	3.84544	3.49795	4.15302	3.32325	4.74397	5.00756	4.44881	5.08296	4.67108
NM_202002	FOXM1	Homo sapiens forkhead box M1 (FOXM1), transcript variant 1, mRNA.	1.91094	3.37e-17	5.54533e-13	5.87923	5.94251	5.39009	5.67027	5.47787	5.32067	5.84302	5.36308	5.24994	5.42027	5.85072	4.11953	5.14872	4.28994	4.33948	4.77325	4.60511	5.10517	4.29634	4.65109	4.33465	3.94187	4.30401	4.66817	4.76418	3.98659	4.13291	3.4975	3.95382	4.33305	3.95598	3.90861	4.34882	5.19896	4.65427	4.96317	4.4514	4.80552	4.27126	4.21431	4.45808	4.5099	5.42338	4.57793
NM_002795	PSMB3	Homo sapiens proteasome (prosome, macropain) subunit, beta type, 3 (PSMB3), mRNA.	1.90942	1.07e-11	1.76068e-07	8.54608	8.4796	8.5578	8.57871	8.00338	8.37808	8.08534	7.11979	8.39797	8.41843	8.10368	8.64298	8.85428	8.34956	8.63584	7.90323	8.31594	8.78653	8.67704	8.6882	8.09613	8.3295	8.54688	7.55331	7.50607	4.5189	7.81397	6.22802	7.50824	7.34805	8.73151	7.80321	8.68095	8.55332	7.60336	8.77571	8.921	8.94558	7.2958	8.2317	9.01969	7.94058	7.35639	7.05074
NM_002416	CXCL9	Homo sapiens chemokine (C-X-C motif) ligand 9 (CXCL9), mRNA.	1.90797	1.6e-07	0.0026328	3.91568	4.66508	4.38679	4.89788	5.67202	2.84927	4.07628	3.84393	4.23499	4.02811	3.97462	3.2343	2.76389	2.5068	3.17368	4.75298	6.74202	3.15849	3.19641	3.21773	2.91326	3.23271	2.18043	6.16094	4.57043	2.3029	2.19871	2.14575	2.03005	4.36613	2.54133	3.95133	3.64044	4.31151	2.8661	3.44372	2.65733	2.53907	2.86415	4.40565	4.53164	3.75854	2.41981	4.09582
NM_016269	LEF1	Homo sapiens lymphoid enhancer-binding factor 1 (LEF1), mRNA.	1.90492	3.34e-13	5.49597e-09	5.0635	5.58985	5.54368	5.23787	5.5953	4.87876	5.46274	4.60862	4.62676	4.91422	5.51049	4.28822	4.65769	4.15145	4.30967	4.97882	5.26795	4.59395	2.88965	3.36872	3.44792	3.31945	3.33298	3.58939	3.22475	2.87477	4.2238	3.49256	3.55494	4.12254	3.51506	4.08483	4.3607	4.20578	4.73922	4.51271	4.95436	4.41831	4.50114	4.7555	5.07486	4.70999	4.49374	4.9321
NM_003533	HIST1H3I	Homo sapiens histone cluster 1, H3i (HIST1H3I), mRNA.	1.8995	1.39e-09	2.28725e-05	9.23282	9.57236	9.53321	8.80376	7.19395	7.50567	9.81651	6.37976	8.33857	7.72896	7.60297	8.38006	8.42118	7.48359	8.58587	8.80591	8.54955	8.13754	7.08603	8.42756	8.96506	8.35334	8.0391	8.58828	7.17742	4.34268	8.14471	5.04591	6.67124	9.6656	9.07014	7.71242	8.0314	8.8603	7.51661	8.88016	8.76953	8.54883	7.13807	8.339	9.52986	8.93239	8.24129	8.69926
NM_000767	CYP2B6	Homo sapiens cytochrome P450, family 2, subfamily B, polypeptide 6 (CYP2B6), mRNA.	1.89901	3.25e-09	5.34787e-05	4.2153	4.61623	4.8521	4.93016	4.57664	4.36178	4.35305	4.68598	4.49307	4.88954	5.05868	3.05159	4.07732	3.45903	3.07993	3.33392	3.72959	4.09623	2.75788	3.04777	3.42359	2.82223	3.45291	3.72535	3.3088	3.1875	2.52244	2.83212	2.72885	2.75719	3.00097	3.28776	3.36113	3.16777	3.44579	3.25205	3.4631	3.26787	3.56103	3.30766	3.78182	3.91804	5.81226	3.36494
NM_005620	S100A11	Homo sapiens S100 calcium binding protein A11 (S100A11), mRNA.	1.89737	2.23e-08	0.000366947	4.93355	4.38836	4.71824	4.18281	4.86293	4.72189	4.52654	4.92926	4.14365	6.58438	5.61955	4.4861	4.68942	3.98099	4.34782	4.44347	4.06458	4.52328	3.4597	3.07998	3.37163	3.43224	3.40751	2.83079	3.27272	2.69698	3.12806	2.63559	3.32784	3.78495	3.39602	4.98447	3.17027	3.13226	2.95174	3.53285	3.89563	3.64036	2.34872	3.20213	3.80094	3.03342	4.1909	3.8606
NM_014708	KNTC1	Homo sapiens kinetochore associated 1 (KNTC1), mRNA.	1.89657	9.25e-22	1.52209e-17	4.26905	4.64009	4.48133	4.38393	4.0969	4.30682	4.69008	3.63148	4.56097	4.3063	4.90536	2.63205	2.86222	2.42855	2.69929	2.87645	2.94459	2.83147	2.47729	2.66512	2.90342	2.48629	2.50366	2.92471	3.31694	2.114	2.86957	2.5278	2.42986	2.85274	2.50604	3.15611	3.39138	3.44608	3.64766	3.48275	3.37974	3.19824	3.45459	4.22032	3.89304	3.31035	3.22444	2.90946
NM_003474	ADAM12	Homo sapiens ADAM metallopeptidase domain 12 (meltrin alpha) (ADAM12), transcript variant 1, mRNA.	1.8954	9.24e-12	1.52044e-07	4.50477	4.43115	4.50488	4.36656	5.07522	4.36162	4.54636	4.44726	4.1905	4.88787	5.16169	3.77915	3.79288	3.4013	3.39378	3.51052	3.65379	3.65637	3.42307	2.92056	3.20819	3.07991	3.19026	3.42079	3.70756	3.33245	3.30262	2.76834	2.88719	2.61287	2.39023	3.17793	3.15389	3.19909	3.12988	3.18256	3.2613	3.13526	3.22923	3.25392	3.25392	3.20612	3.35006	3.25392
NM_002317	LOX	Homo sapiens lysyl oxidase (LOX), mRNA.	1.8949	2.9e-09	4.77195e-05	5.45916	5.73371	5.64503	5.69814	7.8147	6.21577	5.77034	4.09504	4.85231	5.8544	5.05843	4.83844	4.4848	4.4691	5.25027	4.82253	5.10413	4.67879	4.91213	4.6352	4.67792	4.77445	3.90122	4.43741	5.19446	3.90028	5.34859	3.87282	4.47591	3.90284	4.82281	3.62284	4.57347	4.79845	3.72485	4.8178	5.60309	5.03212	2.92025	4.81574	4.32486	4.92631	3.43345	3.56979
NM_004385	VCAN	Homo sapiens versican (VCAN), mRNA.	1.89066	1.88e-12	3.09354e-08	6.50866	7.17311	6.93637	6.61293	8.02994	7.23515	6.28848	5.29634	6.60218	7.33268	6.76298	5.16669	5.51365	5.15977	5.87393	5.75348	6.50681	5.80398	5.31212	5.60109	5.72104	5.79921	5.90639	5.88229	6.09139	3.98291	6.0335	6.01151	5.48933	5.37305	5.87183	5.30908	6.06817	6.22475	5.74084	5.65931	6.12163	5.37681	5.99188	5.84599	6.1701	5.87213	5.89189	5.22006
NM_000216	KAL1	Homo sapiens Kallmann syndrome 1 sequence (KAL1), mRNA.	1.88983	2.44e-15	4.01502e-11	4.43199	4.19107	4.34635	4.50537	4.49369	4.62038	4.27588	4.40344	4.28885	4.44697	4.5174	3.50888	3.66065	3.28371	3.56669	3.37004	3.65019	3.32079	3.31846	3.17741	3.00957	3.26451	3.46864	3.05079	3.27208	2.92469	3.64614	3.19096	2.9093	2.94029	2.68636	3.3158	3.277	2.91659	2.99496	3.15248	3.5028	3.13359	2.80778	2.88122	2.84577	3.19069	3.22267	3.0403
NM_014875	KIF14	Homo sapiens kinesin family member 14 (KIF14), mRNA.	1.88764	4.15e-17	6.82883e-13	2.90188	3.19992	2.78461	2.79171	2.64481	2.82531	2.97851	2.8316	2.93566	3.36277	3.69923	1.78254	1.84987	1.67564	1.73411	1.95835	2.17247	1.95839	1.80167	1.93512	1.87234	2.05643	1.7536	2.36554	2.03398	1.88835	1.85892	1.51907	1.52671	1.7262	1.59256	1.90605	1.91973	2.48936	2.12952	2.21857	2.02201	2.0765	2.15889	2.10165	2.26565	2.11691	2.11223	2.05465
NM_000059	BRCA2	Homo sapiens breast cancer 2, early onset (BRCA2), mRNA.	1.88582	6.91e-19	1.13704e-14	2.92784	3.20223	2.93949	3.08449	2.81734	2.78695	3.15251	2.87474	2.75704	3.29785	3.60313	1.8045	2.05866	1.61705	1.79308	2.06853	2.064	1.98422	1.49506	1.49999	1.75921	1.67521	1.71155	2.01159	1.96933	1.50317	1.79561	1.53896	1.49438	1.62955	1.38834	1.91731	2.23809	2.1821	2.07942	2.25404	1.97759	2.12715	1.86671	2.5198	2.31696	2.16341	2.71296	2.15648
NM_018407	LAPTM4B	Homo sapiens lysosomal associated protein transmembrane 4 beta (LAPTM4B), mRNA.	1.88463	1.55e-15	2.55052e-11	7.42919	7.52322	7.87865	7.32451	8.25419	7.82894	7.52654	6.59612	7.43709	7.84507	6.53753	6.44202	7.39296	6.9951	7.02111	6.60234	7.29591	7.2949	6.22679	7.17406	6.67789	7.07451	6.99925	6.74486	6.87416	4.74623	7.44358	6.78178	6.71552	6.50377	6.93318	6.51165	7.25249	7.26646	6.28016	7.3208	7.22477	7.1383	5.97935	7.08318	6.82898	7.16394	8.1498	5.92526
NM_001949	E2F3	Homo sapiens E2F transcription factor 3 (E2F3), mRNA.	1.87878	1.18e-20	1.94169e-16	5.0472	5.27938	5.22293	4.88495	5.46768	5.49141	5.13514	4.69055	4.66588	5.18268	4.59302	3.23552	4.00143	3.39114	3.68815	3.93956	4.09978	3.78834	3.73668	3.6781	3.96785	3.62615	3.72736	4.08022	4.36956	3.88899	4.11455	3.43447	3.3599	3.47186	3.16327	3.31243	4.15185	4.58576	4.12516	4.33771	4.6549	3.90891	4.27133	3.69849	3.72266	4.20735	3.66061	3.55524
NM_031942	CDCA7	Homo sapiens cell division cycle associated 7 (CDCA7), transcript variant 1, mRNA.	1.87829	6.82e-11	1.12223e-06	5.74651	6.48995	5.99325	6.43315	5.46667	5.3033	6.02478	5.42043	5.53021	5.31698	5.34062	4.26649	4.69206	4.55558	4.36994	4.62378	5.23402	4.76814	4.0958	4.37793	4.67755	3.93767	3.82191	5.71911	4.08646	3.81058	4.62939	3.5529	6.33837	4.00844	4.17912	3.9614	4.48322	4.35942	4.60488	4.82969	4.4993	4.52731	6.11845	4.80579	4.34563	4.91848	4.11952	4.25418
NM_015190	DNAJC9	Homo sapiens DnaJ (Hsp40) homolog, subfamily C, member 9 (DNAJC9), mRNA.	1.8759	6.7e-12	1.10248e-07	6.01596	6.24498	6.20306	6.10049	6.48082	6.23968	6.64695	3.75407	3.2231	7.28967	4.29009	3.3105	4.41186	2.79487	5.55925	4.27797	5.01398	3.67302	2.97993	5.66178	3.55552	3.39788	3.32849	5.42505	4.54154	2.24929	5.56452	5.52112	4.22748	3.639	3.95295	3.20639	6.72485	5.52921	3.51967	5.68644	3.84617	5.12846	5.45576	5.28651	4.9235	5.9635	3.23491	3.84204
NM_020675	SPC25	Homo sapiens SPC25, NDC80 kinetochore complex component, homolog (S. cerevisiae) (SPC25), mRNA.	1.87559	6.44e-13	1.0597e-08	2.53725	2.84865	1.86772	1.74395	1.9665	1.89661	1.90781	1.77329	1.74902	2.48162	2.76802	1.64888	2.42186	2.03502	1.7945	2.23651	2.87701	2.25164	1.63862	1.8235	1.53113	1.38472	1.67921	1.75642	1.58633	1.86637	1.5918	1.9995	1.40833	1.78663	1.30093	1.49093	1.54917	1.89482	1.56613	1.79847	1.92541	1.69338	1.50617	1.83909	1.6497	1.90641	2.54195	1.09258
NM_174942	GAS2L3	Homo sapiens growth arrest-specific 2 like 3 (GAS2L3), mRNA.	1.87541	1.4e-15	2.3037e-11	5.04298	5.59763	5.22595	5.31358	5.11447	5.3509	5.23551	4.93509	4.60197	4.8232	3.36999	3.20786	2.95613	3.18349	3.15415	3.38412	3.66427	3.11135	3.66069	3.42146	3.3238	3.66764	3.61531	4.35061	3.47464	2.85277	3.33041	3.67946	4.08547	3.94965	3.24329	3.05143	3.31632	3.72451	3.89833	4.80686	4.38222	4.41814	4.53042	3.24833	3.82879	3.39295	4.52414	2.61463
NM_006569	CGREF1	Homo sapiens cell growth regulator with EF-hand domain 1 (CGREF1), mRNA.	1.87333	5.08e-11	8.35914e-07	4.81873	5.20624	4.696	4.97637	4.82479	4.66656	4.95016	4.2868	4.09954	5.22885	4.8715	4.28951	4.26525	3.84645	4.208	4.22743	4.1673	4.3544	3.1045	2.99835	3.09125	3.10736	3.22877	4.18697	2.96943	3.24541	3.4432	3.04355	5.15715	3.6615	3.27976	3.63103	3.22377	4.02257	4.11152	3.97773	3.99985	3.99406	4.25517	3.09085	3.4881	4.14079	2.79333	3.29187
NM_000492	CFTR	Homo sapiens cystic fibrosis transmembrane conductance regulator (ATP-binding cassette sub-family C, member 7) (CFTR), mRNA.	1.87325	4.22e-07	0.00694401	3.92763	5.3112	4.73362	5.28141	5.13725	3.82136	4.37509	3.891	3.85082	4.29326	4.27993	3.36054	4.15941	3.39786	3.08537	3.71826	3.98372	4.45617	2.49109	2.64565	2.77623	2.39799	2.49354	6.34032	4.06512	2.70945	3.09102	2.4249	6.91738	2.67961	2.79324	3.17088	3.06542	3.50787	3.21971	3.34503	3.081	2.74559	6.1736	3.66951	3.68168	4.93178	3.55084	3.16903
NM_000569	FCGR3A	Homo sapiens Fc fragment of IgG, low affinity IIIa, receptor (CD16a) (FCGR3A), mRNA.	1.873	1.14e-09	1.87587e-05	6.52457	6.08654	7.45506	5.09519	8.19207	6.09637	6.70679	5.09751	4.69057	7.04509	5.12683	4.5108	5.32035	4.26117	4.90889	5.90331	7.50061	5.32319	4.59272	5.57297	5.82066	5.2722	6.40163	7.35678	5.96819	3.32175	4.68584	4.66297	4.74777	5.48713	5.01372	4.74996	5.26311	6.46603	4.85745	5.82246	5.7763	5.13939	3.73983	5.70059	6.88435	4.45721	4.14033	5.27153
NM_006938	SNRPD1	Homo sapiens small nuclear ribonucleoprotein D1 polypeptide 16kDa (SNRPD1), mRNA.	1.87285	3.15e-16	5.18333e-12	4.27817	4.85403	4.49592	4.72523	5.91472	4.60726	5.03463	4.65216	4.43019	6.30461	4.22243	3.70125	4.57198	3.602	3.97825	3.84196	4.87674	4.02822	3.52589	3.33101	3.51553	3.29009	3.79428	3.91621	3.50729	2.55959	3.25256	3.70973	3.46413	3.78309	3.62217	3.75099	4.9134	3.8065	3.51668	4.04809	3.9053	4.02077	3.103	4.63799	3.9088	3.20377	3.54253	3.32414
NM_007295	BRCA1	Homo sapiens breast cancer 1, early onset (BRCA1), transcript variant BRCA1b, mRNA.	1.87025	6e-20	9.873e-16	3.53993	4.30727	3.8275	3.95247	3.94586	4.09335	4.15737	3.53019	3.55006	3.92499	3.97433	2.30109	2.46384	2.2925	2.51276	2.42104	2.46303	2.71313	2.58849	2.63727	2.86063	2.44271	2.83289	3.20638	3.2313	2.5217	2.61692	2.61768	2.60124	2.64833	2.40602	3.21013	2.75691	2.85888	2.96744	3.1056	2.95693	2.95277	3.06211	2.8147	3.25689	2.82983	3.05096	2.8147
NM_018518	MCM10	Homo sapiens minichromosome maintenance complex component 10 (MCM10), transcript variant 2, mRNA.	1.86946	1.71e-16	2.81381e-12	3.85244	3.68797	3.66114	3.63376	3.50497	3.37014	3.96944	3.93682	3.62814	4.36731	4.43535	2.97145	2.68761	2.56504	2.44882	2.7704	2.77649	2.85644	2.58061	2.53525	2.54677	2.24853	2.50186	2.98849	3.06616	2.86054	2.38746	2.03979	2.18847	2.21104	2.12342	2.52763	2.43309	2.55033	2.68668	3.11045	2.69868	2.84631	2.67746	2.51783	2.88429	2.74033	2.8343	2.75935
NM_003392	WNT5A	Homo sapiens wingless-type MMTV integration site family, member 5A (WNT5A), mRNA.	1.86386	7.95e-16	1.30817e-11	5.56379	5.5078	5.60452	5.5588	5.69491	5.44196	5.48605	5.65204	5.30055	5.62301	5.77433	3.93718	4.20434	4.15887	4.15737	4.25261	4.07119	4.37302	3.71015	3.93191	3.66585	3.68214	3.68214	4.04587	3.9943	3.88565	5.22833	4.41212	4.31624	4.10148	4.10684	4.8387	5.03211	4.90513	4.89935	4.67597	4.85898	4.77955	5.19935	3.96352	4.18861	4.71811	4.6843	3.6225
NM_017671	C20orf42	Homo sapiens chromosome 20 open reading frame 42 (C20orf42), mRNA.	1.86384	7.74e-12	1.27362e-07	5.76789	6.05643	6.05971	6.22639	5.36355	5.46548	6.26082	5.10799	5.17553	6.38108	5.04576	4.05113	5.34562	4.81288	5.01835	5.12311	5.15603	5.39984	3.84931	4.55717	4.84341	4.50528	4.36515	4.98342	5.22359	3.47333	4.97287	3.94964	5.74784	4.69522	4.35923	4.86712	5.48846	5.71145	5.08495	5.5984	5.94222	5.53715	4.16018	5.57498	5.49409	5.27746	4.29179	5.04697
NM_002391	MDK	Homo sapiens midkine (neurite growth-promoting factor 2) (MDK), transcript variant 3, mRNA.	1.86119	3.61e-14	5.94025e-10	7.16625	7.70571	7.4813	8.16006	7.92961	7.17379	7.65936	7.66306	7.00905	7.82194	6.58309	6.23062	8.01316	6.48158	6.79101	7.0564	6.96283	7.88825	6.75372	6.72885	7.01322	6.61426	7.38844	7.12948	6.39869	5.26612	6.39684	6.2537	6.02562	7.03191	7.19635	7.17143	7.01385	7.16173	6.75015	6.83278	7.98337	7.50948	6.41345	7.0977	7.29182	7.69201	8.46177	7.34043
NM_182762	7A5	Homo sapiens putative binding protein 7a5 (7A5), mRNA.	1.85894	1.14e-09	1.87587e-05	6.02209	6.04516	6.68838	6.66664	4.60267	5.51321	6.36889	4.67703	5.81026	6.30939	5.75112	3.96973	5.5744	4.23958	4.58694	5.69421	4.74653	5.7352	4.13621	4.49107	5.23795	4.74439	4.98352	5.62068	5.45889	3.38386	6.03734	3.3832	4.68789	4.46941	4.14626	4.20914	4.81848	5.73022	5.26865	6.24802	5.65986	4.85904	4.59783	6.64199	6.11436	6.02582	4.4939	4.51976
NM_006591	POLD3	Homo sapiens polymerase (DNA-directed), delta 3, accessory subunit (POLD3), mRNA.	1.85844	2.76e-20	4.54158e-16	5.0392	6.28552	5.80785	5.62816	5.65536	5.54209	6.07929	4.18882	5.08437	5.78386	4.8528	3.72167	4.51698	3.91103	4.37878	4.91123	4.53907	4.94395	4.18316	4.73328	4.62767	4.62744	4.59671	4.8175	5.02875	3.44557	4.58907	3.74097	4.0503	4.06905	4.17224	4.10188	5.15477	5.26811	4.64779	5.44831	5.34089	5.14305	4.91771	4.99746	5.63292	4.44258	3.66538	4.73454
NM_153332	THEX1	Homo sapiens three prime histone mRNA exonuclease 1 (THEX1), mRNA.	1.85751	2.54e-20	4.17957e-16	4.30051	4.81402	4.5529	4.27846	4.27451	4.11973	4.38297	3.80019	4.27078	4.03481	4.0205	2.89458	2.7426	2.80911	3.00153	2.83769	3.20648	3.04834	1.61535	2.47497	2.62529	3.16604	2.28605	2.86442	2.75659	2.35807	3.01862	2.87524	2.28711	2.56847	2.44351	3.05456	3.27305	3.62169	3.13577	3.44939	3.53277	3.23851	3.22931	3.15171	3.07579	2.12271	2.20659	2.15964
NM_001081640	PRKDC	Homo sapiens protein kinase, DNA-activated, catalytic polypeptide (PRKDC), transcript variant 2, mRNA.	1.85643	7.45e-20	1.2259e-15	6.59315	7.19674	6.58157	6.92052	6.93382	7.25586	6.86987	5.18823	6.84576	6.59248	6.50949	5.22534	5.51242	4.95912	5.34458	5.51821	5.7611	5.65885	5.2022	5.05367	5.60274	5.29792	5.23259	5.46432	6.39985	3.70096	6.35337	5.64674	5.82416	5.62181	5.15424	5.34654	6.26156	6.20343	5.97551	6.13818	6.31047	5.88261	6.34736	5.99276	5.91901	5.75327	6.01231	5.38532
NM_002966	S100A10	Homo sapiens S100 calcium binding protein A10 (S100A10), mRNA.	1.85376	1.57e-10	2.58344e-06	11.2462	12.0937	11.2125	11.2063	11.8531	11.1438	10.7047	8.04471	10.494	11.49	9.72563	10.9887	11.9582	10.0651	10.7997	11.9909	11.7339	12.0423	10.9611	11.033	10.7924	10.7174	10.7106	11.2445	10.7766	6.24747	11.356	9.05593	10.9752	9.81672	11.2946	9.30825	9.68072	10.6666	9.1659	10.6732	11.3062	10.9644	9.40215	10.1742	10.4555	10.5002	10.7349	9.82715
NM_018487	TMEM176A	Homo sapiens transmembrane protein 176A (TMEM176A), mRNA.	1.85218	3.32e-11	5.46306e-07	7.59501	8.15458	8.18224	8.1337	8.68224	7.51807	7.94186	6.85907	7.0944	7.93121	7.77586	7.60951	8.22868	6.60057	7.3716	8.17893	8.11578	8.41972	7.78944	7.46101	7.80283	7.1771	7.51258	7.15571	6.65155	5.09978	7.19085	6.88655	6.78964	7.09233	7.30388	6.97776	7.05529	7.46895	6.13542	7.40772	7.65385	7.32115	6.19781	7.68433	8.29646	7.51989	7.64096	7.20492
NM_004106	FCER1G	Homo sapiens Fc fragment of IgE, high affinity I, receptor for; gamma polypeptide (FCER1G), mRNA.	1.85085	4.6e-08	0.00075693	6.18749	7.20281	6.98384	5.78841	7.21071	6.14801	5.79647	4.57454	5.17716	5.80058	4.15769	6.21161	6.70002	4.88015	6.25304	7.42362	7.44997	6.92103	6.04887	6.26199	6.09757	6.11818	7.05009	6.48496	4.98595	3.39734	5.19217	5.65029	5.80676	6.00683	6.58731	6.02365	5.79964	6.81653	4.16316	6.29479	6.69002	5.44168	4.009	6.50646	6.63424	5.37594	5.11172	5.26168
NM_144963	FAM91A1	Homo sapiens family with sequence similarity 91, member A1 (FAM91A1), mRNA.	1.84942	9.75e-14	1.60436e-09	7.02119	6.94979	6.7353	6.89423	7.47862	6.83536	6.92525	6.16818	6.57849	7.4821	7.26835	6.3516	6.06579	5.94899	6.56169	5.43789	5.72294	5.45153	5.48015	5.80102	5.08408	5.49128	5.47465	5.45766	5.81667	5.19545	5.68614	5.77989	5.58965	5.31722	5.68154	5.95468	6.69457	6.0603	5.80504	6.33488	6.13326	6.35784	6.21256	5.71432	5.65459	5.91014	4.90624	5.05976
NM_017611	SLC43A3	Homo sapiens solute carrier family 43, member 3 (SLC43A3), mRNA.	1.84847	1.27e-13	2.08979e-09	6.56587	6.84728	6.53191	6.20653	7.10008	6.59734	6.50931	5.64574	5.53546	6.60205	5.96012	6.09264	5.70307	5.22939	5.90755	5.66756	6.05802	5.67689	6.05727	5.70033	5.46584	5.60109	5.78082	5.6081	5.96754	4.64174	5.97275	5.13561	5.87977	5.54472	5.72084	5.52314	5.95551	5.72291	5.4302	5.85092	6.00762	5.61303	5.28671	5.46185	6.04056	5.20082	6.0714	5.32904
NM_012484	HMMR	Homo sapiens hyaluronan-mediated motility receptor (RHAMM) (HMMR), transcript variant 1, mRNA.	1.84603	5.46e-15	8.98443e-11	3.08549	3.41498	3.29533	2.83235	2.63858	2.41432	3.57396	2.86172	2.63421	3.41604	3.46902	1.71267	1.76484	1.69629	1.72624	2.04547	2.14714	1.96406	1.52397	1.96667	2.36097	1.81431	1.97908	2.35715	2.38386	1.76837	2.10076	1.8919	1.65303	1.92182	1.81397	2.14717	2.00523	2.62601	2.14867	2.7658	2.14341	2.20119	2.3237	2.8245	2.69137	1.85584	1.76306	1.77901
NM_002309	LIF	Homo sapiens leukemia inhibitory factor (cholinergic differentiation factor) (LIF), mRNA.	1.84392	5.03e-10	8.27686e-06	5.33087	4.83672	5.28979	4.59857	5.19197	4.59993	5.53902	4.37442	4.52412	5.86168	3.85481	3.8125	4.74226	2.9701	4.59982	3.26506	5.69452	4.43808	3.56294	3.61199	3.81678	3.8928	4.72844	3.9296	3.72375	3.78908	4.80953	2.93619	4.3509	3.1068	3.82189	3.55764	3.95882	4.2842	2.991	4.84548	4.97257	3.83306	3.61518	3.78912	4.72534	3.96684	4.41957	3.69485
NM_014467	SRPX2	Homo sapiens sushi-repeat-containing protein, X-linked 2 (SRPX2), mRNA.	1.84367	4.09e-12	6.7301e-08	5.60461	6.43725	5.90181	5.93176	7.00859	6.41419	5.96651	5.71577	5.25717	6.01349	5.77981	5.27074	5.15343	4.54393	4.87532	4.84073	5.0635	5.20041	5.49256	4.69384	4.6126	4.52111	5.25488	5.2662	5.90358	4.4452	5.53929	4.4408	4.67067	4.2025	4.59662	4.04425	4.67651	3.61158	4.46045	4.34478	4.93439	4.30932	4.22474	4.70309	5.54955	4.9673	4.12879	4.28144
NM_021238	FAM60A	Homo sapiens family with sequence similarity 60, member A (FAM60A), mRNA.	1.84332	4.77e-12	7.84903e-08	5.58223	5.76001	5.84851	5.59724	4.84107	4.8959	5.54601	3.54314	5.143	6.22413	5.96206	4.71373	5.25845	4.69857	5.39288	5.3966	5.58966	5.19708	4.54556	4.79725	4.59712	5.28992	4.52612	4.75421	4.70685	2.53214	5.43946	2.9886	3.81542	4.25188	3.35771	5.00262	5.11369	5.85947	5.03363	5.54893	5.78802	5.39967	5.27801	4.99916	5.81102	5.43422	5.2744	3.2504
NM_001219	CALU	Homo sapiens calumenin (CALU), mRNA.	1.84177	1.19e-11	1.95814e-07	6.68248	8.46245	6.90783	6.83918	8.06542	7.85299	7.45911	5.15919	6.43237	6.89471	6.14301	5.39834	5.53713	5.10819	5.76846	5.76218	6.394	5.88844	5.28221	6.01192	5.72224	6.17969	5.75028	6.67688	5.69193	3.93583	6.60923	6.48721	6.84562	5.78085	6.18092	5.20863	6.64723	6.58158	5.50405	6.8617	6.93998	6.19531	7.39054	6.35598	6.14125	5.32379	4.92064	4.49003
NM_138737	HEPH	Homo sapiens hephaestin (HEPH), transcript variant 1, mRNA.	1.83836	2.67e-10	4.39349e-06	5.49294	7.22989	5.78561	6.37691	6.88236	7.53917	6.32737	4.55332	5.15542	5.46801	5.34999	4.51451	6.22661	4.56887	5.01337	4.91622	5.45705	6.37893	4.19518	5.12041	3.64311	4.98021	4.0468	4.82938	5.09909	3.60413	4.7867	5.17593	5.56135	3.37062	5.07791	4.03529	5.48501	4.34057	3.90838	5.25819	5.38194	4.89075	6.39996	3.98284	4.27514	5.96483	4.48864	3.3325
NM_000235	LIPA	Homo sapiens lipase A, lysosomal acid, cholesterol esterase (Wolman disease) (LIPA), mRNA.	1.83768	5.49e-14	9.03379e-10	7.27155	7.58741	8.18118	7.5791	8.13859	7.34902	7.99147	5.21694	7.04963	7.33798	6.12394	6.0072	7.31126	6.31246	6.65189	6.86474	7.49387	7.46749	6.00745	6.72187	6.8766	6.72911	6.61322	7.3009	6.75391	4.32569	6.61705	6.05427	7.25694	6.40255	6.14185	6.30843	7.24526	7.44355	6.23608	7.58985	7.20765	7.17188	5.58338	7.64747	7.47457	7.56924	5.56246	5.73798
NM_006431	CCT2	Homo sapiens chaperonin containing TCP1, subunit 2 (beta) (CCT2), mRNA.	1.83517	1.15e-14	1.89232e-10	8.87757	8.81499	9.07922	8.88281	8.94815	9.17311	9.25458	7.08059	8.37463	9.56557	7.09509	7.14793	7.63259	7.51658	7.88077	7.6489	7.96834	7.89975	7.26191	8.13306	7.739	7.77187	8.10625	8.49969	8.39297	4.39888	8.24732	7.11191	7.80405	7.68139	7.84491	6.86124	8.17823	8.22794	7.51689	8.58853	8.27029	8.16824	7.42915	8.21625	8.21557	7.43552	6.95002	6.66514
NM_001237	CCNA2	Homo sapiens cyclin A2 (CCNA2), mRNA.	1.83129	3.23e-13	5.31497e-09	5.61572	5.96069	5.60671	5.32277	5.40448	5.05308	5.78875	5.10494	4.76588	5.3334	4.93476	4.48149	5.26775	4.75336	4.77147	5.43627	5.66643	5.40648	3.54209	4.25582	4.36099	3.55163	4.05346	4.77881	4.0116	3.83022	4.83233	4.06321	4.37534	4.82494	4.79205	4.10792	3.91464	5.29263	4.69622	4.70589	4.24208	4.57282	4.2708	5.58341	5.35124	4.76582	4.80608	4.90072
NM_002214	ITGB8	Homo sapiens integrin, beta 8 (ITGB8), mRNA.	1.83116	8.32e-13	1.36906e-08	5.6627	6.29354	5.81675	6.30056	7.14061	6.04958	5.87417	5.01568	5.5236	6.02104	5.47365	4.31837	4.81216	4.33094	5.19623	4.672	5.09931	4.62294	4.27142	4.83043	4.92533	4.85975	4.67438	6.51949	5.51414	3.82027	5.35567	4.75091	5.67715	4.66947	4.58441	4.44128	4.98486	4.90525	4.77487	4.57481	4.80134	4.48574	5.79734	5.56883	5.06449	4.97734	4.08118	4.48662
NM_018087	TMEM48	Homo sapiens transmembrane protein 48 (TMEM48), mRNA.	1.83086	3.07e-17	5.05168e-13	4.72825	5.56257	5.07129	4.84152	5.27441	5.1862	5.08906	3.82874	5.11503	5.54002	4.30374	3.98951	3.91491	3.6944	4.12792	4.18602	4.44948	4.16369	3.50648	4.13463	4.3306	4.13192	3.90492	4.20553	4.04688	3.27346	4.46661	3.70603	3.75057	4.10618	3.66161	3.72787	4.32266	4.88303	3.87257	4.64142	4.12468	4.2779	3.35586	4.70174	4.53602	3.69807	3.81231	3.34257
NM_001037540	SCML1	Homo sapiens sex comb on midleg-like 1 (Drosophila) (SCML1), transcript variant 1, mRNA.	1.83022	3.22e-14	5.29851e-10	4.19881	4.78833	4.41968	4.42219	5.17984	4.90115	4.4098	3.9943	5.08111	5.06832	4.95245	3.77141	3.6441	3.42416	3.82737	3.52935	3.97769	3.56449	3.11511	2.8192	3.34029	3.55843	3.90727	4.54474	4.18204	2.87034	4.53056	3.49856	2.68997	3.13808	3.33113	3.25665	3.70682	3.33739	3.37526	3.35723	3.06221	3.63731	4.83588	4.23102	4.08222	3.47115	3.72058	3.22443
NM_014220	TM4SF1	Homo sapiens transmembrane 4 L six family member 1 (TM4SF1), mRNA.	1.82405	8.53e-12	1.40361e-07	9.81783	9.15705	9.59292	8.7303	9.80832	8.83144	9.02526	7.32108	8.54126	10.4798	8.20781	8.36073	8.00472	7.82961	8.15584	8.41112	8.99832	8.14595	8.49228	8.77833	8.20888	8.19403	9.06744	8.16222	9.31143	4.13281	9.67742	6.70107	8.40692	7.62356	8.30074	7.28678	8.21461	8.97817	7.52122	9.07561	9.29852	8.42829	7.57746	8.41662	8.98184	7.89541	7.01199	7.71999
NM_000291	PGK1	Homo sapiens phosphoglycerate kinase 1 (PGK1), mRNA.	1.82191	2.25e-13	3.70237e-09	9.9378	10.4634	10.3342	9.66768	9.31857	10.0358	9.52453	9.0466	8.89268	9.1866	8.88294	7.52852	8.09609	8.96414	8.20354	8.34131	8.34438	7.98517	8.34508	9.34872	8.71884	8.16323	8.53532	9.20913	9.12425	5.79796	9.55845	8.70981	9.2716	8.17928	8.13932	7.66341	8.72739	9.68623	8.66648	9.9494	10.1745	9.92055	8.69678	8.67199	8.82591	9.37713	6.17707	7.44776
NM_004219	PTTG1	Homo sapiens pituitary tumor-transforming 1 (PTTG1), mRNA.	1.81569	6.75e-14	1.11071e-09	7.21391	8.12608	7.08533	7.18781	6.56236	6.83663	7.23295	7.08145	6.291	6.28106	6.29023	4.93054	6.92094	5.37459	5.12865	7.07966	7.32359	7.06057	5.71012	6.37562	6.62699	5.89645	6.45505	7.07196	7.16417	6.19824	6.73413	5.25113	5.65138	6.0945	6.5215	6.0882	5.80181	6.98574	6.11408	6.62855	6.29147	6.63582	6.11902	5.92608	6.96085	6.64005	6.87604	7.29818
NM_003504	CDC45L	Homo sapiens CDC45 cell division cycle 45-like (S. cerevisiae) (CDC45L), mRNA.	1.81038	1.15e-17	1.89232e-13	5.24477	4.95469	4.74545	4.86252	4.8736	4.72808	4.99894	4.83755	4.82476	5.25214	5.14342	4.02961	4.43613	4.04767	4.02822	3.92838	4.34158	4.53447	3.65322	4.11646	3.81468	3.56362	3.7464	3.91592	3.83852	3.76096	3.4784	3.20668	3.40745	3.89485	3.6472	3.96603	3.99843	4.18795	3.85358	4.13392	3.93793	4.14375	3.63756	4.22549	4.42663	4.16411	4.23099	4.11547
NM_006733	CENPI	Homo sapiens centromere protein I (CENPI), mRNA.	1.80937	5.28e-17	8.68824e-13	3.84181	4.24827	3.69711	3.84362	3.93708	3.92124	3.61316	3.66583	3.45026	3.57515	4.03188	2.38005	2.39703	2.17135	2.21515	2.56011	2.66968	2.65204	2.28199	2.45309	2.54699	2.23908	2.20539	2.84784	2.88619	2.43737	2.4873	2.38385	2.05435	2.29808	2.0751	2.33913	2.15157	2.43944	2.20998	2.34914	1.99315	2.07376	2.19493	2.47928	2.74107	2.15135	2.87632	2.04596
NM_001042551	SMC2	Homo sapiens structural maintenance of chromosomes 2 (SMC2), transcript variant 2, mRNA.	1.80898	4.89e-15	8.0465e-11	4.67646	5.11635	4.678	4.63223	4.71227	4.91348	5.27493	3.42495	4.84673	5.28338	4.37761	3.41996	3.24899	3.17095	3.57378	3.71114	4.12066	3.54969	3.11924	3.10469	3.19627	3.56112	3.36641	3.83667	3.53555	2.0867	3.87478	4.14702	3.95838	4.34838	3.52878	3.20231	4.23075	4.51659	4.2335	4.54281	4.06643	4.12691	3.5841	4.36807	3.80571	3.1414	3.32925	2.67205
NM_032869	NUDCD1	Homo sapiens NudC domain containing 1 (NUDCD1), mRNA.	1.80798	2.72e-16	4.47576e-12	5.10774	5.70134	5.67604	5.44818	5.75263	5.50753	5.99445	4.10177	5.37757	6.29066	5.00712	4.20769	3.95531	4.58466	4.84086	4.34595	4.89605	4.2062	3.9347	4.44902	4.3505	4.92043	4.77481	4.76175	4.15947	2.94125	5.08887	4.02405	4.60029	4.25159	4.22376	3.82523	4.77849	4.76184	4.28265	5.18465	4.85766	4.71547	4.22298	4.85985	4.77163	3.99621	3.95858	3.25866
NM_006819	STIP1	Homo sapiens stress-induced-phosphoprotein 1 (Hsp70/Hsp90-organizing protein) (STIP1), mRNA.	1.80588	1.18e-12	1.94169e-08	8.11872	8.6435	8.25726	8.13983	8.87949	8.49065	8.35485	5.91496	7.59781	8.86695	6.98991	7.24801	7.8836	7.51637	7.61712	7.80851	7.52769	7.71955	7.45766	8.07851	7.70548	7.37916	8.26502	7.43208	7.50166	4.23128	8.58321	6.26117	7.59925	7.06852	7.10478	6.51537	7.38989	7.61425	7.23765	7.98669	7.89611	7.57939	7.52119	7.44807	7.56339	6.79031	6.26868	6.91631
NM_005720	ARPC1B	Homo sapiens actin related protein 2/3 complex, subunit 1B, 41kDa (ARPC1B), mRNA.	1.80534	6.27e-15	1.03173e-10	8.35214	8.55142	8.85637	8.11274	9.12945	8.22382	8.25904	7.15845	7.43967	8.27502	7.38094	6.65381	7.93562	7.13854	7.17858	7.21973	7.819	7.84055	6.64537	7.55827	7.04493	7.3098	7.04739	8.36394	7.71711	5.0068	7.7078	6.70525	7.4153	6.85577	7.22302	6.79676	7.40428	8.11612	6.88341	7.36325	7.82079	7.65121	6.95566	7.43827	7.6119	7.76341	6.41324	7.00852
NM_012223	MYO1B	Homo sapiens myosin IB (MYO1B), mRNA.	1.80487	3.33e-14	5.47952e-10	5.57999	6.49144	6.31187	6.21287	6.61953	6.54105	5.87873	4.77133	5.95983	5.78433	5.17973	5.26506	4.51239	4.58306	5.4077	4.92979	5.83885	4.94561	4.62949	4.63806	4.96174	5.18647	4.63486	5.24399	5.29134	3.32807	6.03297	4.74931	5.83772	4.5979	4.56631	4.27982	5.47887	5.77803	5.28073	5.45595	5.83704	5.01687	5.38141	5.42292	5.37981	4.77926	4.90827	4.08492
NM_178014	TUBB	Homo sapiens tubulin, beta (TUBB), mRNA.	1.80227	4.06e-13	6.68073e-09	8.06322	9.33525	8.29824	7.83459	9.16996	8.38712	8.14738	6.2279	6.98212	8.41268	6.84797	7.47731	7.27151	7.3605	6.36685	7.82818	7.71382	7.75166	7.02042	7.42953	7.18518	7.24047	6.71028	7.61647	7.42456	4.00677	7.47865	7.2564	7.73222	7.93535	8.10981	7.40935	7.65695	8.20725	7.57556	7.46262	8.20293	7.46609	7.27081	7.74443	8.12215	7.54993	7.6707	7.80654
NM_004995	MMP14	Homo sapiens matrix metallopeptidase 14 (membrane-inserted) (MMP14), mRNA.	1.80093	4.9e-16	8.06295e-12	7.47883	7.87919	7.76573	7.80305	8.21853	7.99779	7.82738	6.95453	6.65603	7.34865	6.81557	6.63536	6.98176	6.77943	6.8452	6.81298	7.02428	6.8968	6.89176	6.78249	6.75397	6.58075	6.54899	6.57234	6.94406	5.5736	6.78125	6.0413	6.42211	6.18538	6.56633	6.22647	6.66929	7.00021	6.57154	6.74884	6.9454	6.59778	6.46948	6.96631	7.17491	6.92061	6.69247	6.51237
NM_002875	RAD51	Homo sapiens RAD51 homolog (RecA homolog, E. coli) (S. cerevisiae) (RAD51), transcript variant 1, mRNA.	1.79996	6.39e-16	1.05147e-11	3.87357	3.72295	3.65641	3.71731	3.80928	3.57181	3.84441	3.09111	3.38197	4.46285	4.16838	2.42845	2.80993	2.54745	2.43975	2.74739	2.81793	2.84365	2.04664	2.79079	2.17742	2.0287	2.4277	2.48371	2.08123	2.16095	2.76234	2.29223	2.46879	2.53641	2.69863	2.30542	2.05501	2.3353	2.09881	2.59362	2.48936	2.27656	1.92318	2.04786	2.50673	2.85827	2.62695	2.88518
NM_002907	RECQL	Homo sapiens RecQ protein-like (DNA helicase Q1-like) (RECQL), transcript variant 1, mRNA.	1.79879	2.53e-14	4.16311e-10	4.58039	5.71308	5.75369	5.29377	6.08278	6.19492	5.48592	3.95192	4.68349	5.43793	4.49172	3.82803	3.67691	4.17689	4.01169	3.97551	4.83036	3.78255	3.34756	3.92869	4.17803	3.7075	4.22771	4.4511	4.93951	2.15755	4.31241	4.56645	4.4605	3.84129	3.83884	4.01343	4.85143	4.68917	3.30569	4.93572	4.66929	4.27598	4.3034	5.15267	4.95232	4.03961	3.38033	3.1149
ENST00000370175	FAM58A	family with sequence similarity 58, member A (FAM58A), mRNA gene:ENSG00000147382	1.79862	1.97e-09	3.24164e-05	4.16638	4.88972	5.3621	4.64962	5.60682	4.26903	4.04418	4.95145	5.02413	6.87542	4.03119	3.19799	4.81697	5.3234	4.26252	4.51576	5.41692	4.80886	3.33195	5.15094	2.27624	5.05318	4.58834	4.01975	4.57449	2.97692	3.96026	3.45832	3.48068	2.84501	4.3712	2.24742	5.97361	3.9897	3.84824	3.5376	3.73134	3.44395	3.45288	4.38125	5.27308	3.95446	0.940805	4.18165
NM_024956	TMEM62	Homo sapiens transmembrane protein 62 (TMEM62), mRNA.	1.79822	5.45e-14	8.96797e-10	5.45728	6.0372	6.21791	6.17537	5.76863	5.42608	5.84126	4.01662	5.67566	6.69075	4.75159	4.82545	4.58481	5.03121	5.75762	5.02333	4.80458	4.76159	4.08218	4.69043	4.65552	5.75184	4.84608	4.81184	4.53174	2.45903	4.825	3.55399	5.29231	4.487	4.42371	4.23994	5.65151	5.6993	5.17992	6.06548	5.97084	5.91951	4.44165	5.57506	5.26436	4.5115	4.24129	3.21358
NM_016195	MPHOSPH1	Homo sapiens M-phase phosphoprotein 1 (MPHOSPH1), mRNA.	1.79808	2.13e-17	3.50492e-13	2.37105	3.09589	2.85798	2.77697	2.78554	2.91447	2.94895	2.35561	2.75901	2.93601	2.97266	1.43005	1.53063	1.25057	1.36587	1.53184	1.79554	1.60097	1.5436	1.33445	1.42399	1.45892	1.31413	1.39704	1.62317	1.17472	1.32908	1.54551	1.19184	1.48914	1.22765	1.719	1.79741	2.05746	1.90146	2.28378	1.96108	2.03286	1.74789	2.30874	2.128	1.9506	2.05383	1.5191
NM_003999	OSMR	Homo sapiens oncostatin M receptor (OSMR), mRNA.	1.79042	5.58e-10	9.18189e-06	6.22778	7.06497	6.46094	5.85808	7.37509	6.7226	6.13756	4.55647	5.71744	6.7198	5.59308	5.36154	4.66526	4.28242	5.39402	5.31547	5.79725	4.89816	5.47645	5.3166	5.07163	5.73609	5.577	5.69989	6.32114	3.54665	7.56365	5.43364	5.36953	4.89766	5.16936	4.60312	5.86609	5.71542	5.04555	5.62871	6.12181	5.54617	6.84682	4.98689	5.16296	4.52701	4.43261	4.32172
NM_138455	CTHRC1	Homo sapiens collagen triple helix repeat containing 1 (CTHRC1), mRNA.	1.79016	1.42e-12	2.33661e-08	6.03683	5.70761	6.01436	6.05344	6.21657	5.94446	5.84178	6.19392	5.72886	6.34477	6.22837	5.18771	5.37426	5.04032	5.4174	5.18416	5.62153	5.4455	5.02239	4.95367	4.78805	5.17055	4.92879	5.3931	4.92784	4.01414	4.88795	4.61099	4.80868	4.88428	5.25107	4.60955	5.1424	4.82207	4.48868	4.46229	4.45144	4.66892	4.3334	5.01231	4.97982	4.98904	5.52607	4.56068
ENST00000296978	KIAA1913	KIAA1913 (KIAA1913), mRNA gene:ENSG00000164484	1.78233	3.67e-12	6.03898e-08	4.17424	3.92112	3.79363	3.68945	4.50921	3.93727	3.78018	4.45229	4.37878	4.55823	4.28673	3.142	2.96761	3.60236	2.96285	2.90945	3.45965	3.4465	3.01508	2.6725	2.99361	2.69431	2.56432	2.84673	2.47443	2.24502	2.17341	2.09167	2.168	2.36121	2.17658	3.28658	2.94298	2.6688	3.8639	2.84923	2.82166	3.06973	2.50999	3.31247	2.80686	3.20487	2.6218	2.54308
NM_182904	P4HA3	Homo sapiens procollagen-proline, 2-oxoglutarate 4-dioxygenase (proline 4-hydroxylase), alpha polypeptide III (P4HA3), mRNA.	1.78144	1.03e-11	1.69487e-07	4.43211	4.01486	3.98813	4.31481	5.20099	4.26079	4.32207	4.39429	4.01707	4.84251	4.7917	3.55599	3.52711	3.78684	3.23845	3.57179	3.72779	3.23823	3.14634	3.29595	3.05186	3.62893	4.1091	3.5259	3.37404	3.76637	2.87615	3.10064	3.28518	3.22498	3.41034	3.4613	2.92615	2.67911	3.17147	3.16308	3.25442	3.28368	2.87604	3.08492	3.17018	3.09522	3.38267	3.31512
NM_005823	MSLN	Homo sapiens mesothelin (MSLN), transcript variant 1, mRNA.	1.78102	4.64e-07	0.00763512	6.10362	5.673	5.64318	5.76155	5.68038	5.74667	5.83019	6.0432	5.51587	6.00697	6.28634	4.79274	5.33564	4.86763	4.83044	4.53418	4.3858	5.22319	4.40174	4.41924	4.20038	4.23667	4.39566	4.33646	4.88732	4.54903	6.08231	4.25312	4.43895	4.18839	4.65686	4.29856	4.61716	4.62424	4.65473	4.72492	4.7421	4.88809	4.81527	4.07986	4.30626	4.69196	4.83938	4.48041
NM_004864	GDF15	Homo sapiens growth differentiation factor 15 (GDF15), mRNA.	1.7794	1.76e-07	0.00289608	6.70846	6.12897	6.64469	6.71924	5.88144	5.91266	6.72312	6.09218	6.30105	7.03062	7.047	5.61812	6.35026	5.69281	6.94306	5.13974	5.96285	6.37539	5.58567	5.68635	5.427	6.65501	6.60956	5.94858	5.57657	5.14849	5.56125	4.74185	6.51701	5.68574	5.96607	5.7777	6.45816	5.89202	5.85747	5.9579	6.04854	6.18569	6.14864	5.76488	6.58534	6.37625	6.01947	5.42684
NM_018154	ASF1B	Homo sapiens ASF1 anti-silencing function 1 homolog B (S. cerevisiae) (ASF1B), mRNA.	1.77895	1.52e-13	2.50116e-09	6.57041	6.06973	6.07428	6.20581	5.47319	5.35755	6.07679	5.6766	4.51211	5.31265	5.36706	4.4341	5.52414	4.75264	4.16442	5.15012	5.42532	5.6654	4.41896	5.02946	4.77893	4.32885	4.53994	4.51966	4.37985	4.28709	4.2592	4.01781	3.79325	4.24008	4.40042	3.5895	4.64906	5.24157	4.51599	5.54333	5.08001	5.2155	3.75008	4.41634	5.49533	4.81591	5.58364	4.72402
NM_198433	AURKA	Homo sapiens aurora kinase A (AURKA), transcript variant 1, mRNA.	1.77834	2.69e-16	4.4264e-12	5.0084	5.15533	4.97809	5.23157	4.25571	4.72177	5.59469	4.61092	4.82544	4.90655	4.48296	3.63717	4.46696	3.98818	3.97865	4.43066	4.50532	4.7846	3.53966	4.3499	4.24342	3.87434	4.17196	4.01345	3.99269	3.74845	3.68114	2.67444	3.31153	3.84113	3.43595	2.55694	3.76935	4.26123	4.32171	4.80164	4.02997	4.78538	3.36891	4.18844	4.85979	4.20419	4.58741	3.98443
NM_024829	FLJ22662	Homo sapiens hypothetical protein FLJ22662 (FLJ22662), mRNA.	1.77826	2.31e-11	3.8011e-07	6.48173	7.36033	7.69755	7.48937	7.27219	7.05694	7.44553	5.62275	6.0922	7.3433	5.17769	5.51835	6.86	6.03651	6.4411	6.81879	6.43794	6.84528	5.56622	6.34841	6.4967	6.05711	6.64309	6.39794	6.46479	2.594	6.51846	5.38538	5.90448	6.64618	6.11645	6.38497	6.75294	6.45285	5.76707	6.5278	7.27018	6.34199	4.20061	6.8334	7.333	6.59361	6.02929	5.83047
NM_020242	KIF15	Homo sapiens kinesin family member 15 (KIF15), mRNA.	1.77661	2.99e-15	4.92004e-11	2.97329	3.34757	3.07409	3.09585	2.90392	2.92519	3.30071	2.96793	2.90783	3.68338	3.6546	1.69569	2.05607	1.69337	1.8272	1.90853	2.03504	2.00321	1.79695	1.82724	1.98012	1.86841	1.76928	2.4601	1.96798	2.1772	2.03738	1.81518	1.69654	1.92579	1.78215	2.34616	1.9504	2.38754	2.11825	2.07983	1.93608	2.02962	1.77078	2.12768	2.12768	2.40912	2.12768	2.01698
NM_001005340	GPNMB	Homo sapiens glycoprotein (transmembrane) nmb (GPNMB), transcript variant 1, mRNA.	1.77523	5.62e-08	0.000924771	7.85353	9.17064	8.98421	7.94555	9.6922	9.16193	8.38001	6.27151	6.98643	7.85898	6.18852	8.3221	7.18066	6.78011	8.29814	7.73251	8.50858	7.10402	7.95205	8.07221	6.82898	8.2285	7.02855	7.83742	7.38569	4.2632	7.77123	7.72178	7.92806	7.75188	8.14199	7.00478	7.75348	7.97582	5.83947	7.6795	8.20281	7.91797	6.81942	7.60647	7.87319	6.60714	6.3207	6.63064
NM_032844	MASTL	Homo sapiens microtubule associated serine/threonine kinase-like (MASTL), mRNA.	1.77264	1.95e-15	3.20872e-11	4.73676	5.3143	5.08838	4.83613	4.7874	5.18489	4.86054	4.06912	4.49115	5.20333	4.59424	3.39361	3.31143	3.04512	3.71021	3.34567	3.56459	3.3553	3.27295	2.9372	3.18728	2.84662	3.29173	3.42974	3.78433	2.34125	4.1227	3.58813	3.42596	3.86898	3.25027	3.08227	4.13496	4.29275	3.9198	4.6811	4.06961	4.55149	3.71825	4.5959	4.02735	3.60719	3.84818	3.60197
NR_003573	ANXA2P2	Homo sapiens annexin A2 pseudogene 2 (ANXA2P2) on chromosome 9.	1.77121	1.73e-14	2.84672e-10	9.39605	9.31081	9.23306	9.40447	9.28239	8.87963	8.35112	6.62432	8.34982	9.80773	7.82048	9.26811	9.54493	8.03763	9.06317	9.36782	9.33513	9.88937	8.45129	9.353	9.03074	9.2027	9.59023	9.01645	9.39432	7.45247	9.48157	6.89032	9.04817	8.79935	8.62356	8.4035	8.59561	9.03936	8.19547	9.30342	9.47985	8.85461	7.26627	8.50781	9.5529	8.50781	8.23678	8.2505
NM_005044	PRKX	Homo sapiens protein kinase, X-linked (PRKX), mRNA.	1.77081	3.88e-18	6.38454e-14	5.6526	6.18157	6.32974	6.24614	6.57534	6.06599	6.42411	5.47776	5.48707	6.53227	6.17317	4.31524	4.20977	4.30551	4.42843	4.12489	4.99059	4.59282	4.20017	4.2591	4.09725	4.28977	4.27173	4.22437	4.40032	2.7679	4.76305	4.75613	4.78081	4.05921	4.36973	5.19006	5.29261	5.4153	5.40764	5.61666	5.52986	5.24225	4.77991	4.85046	4.12551	3.93059	3.78146	3.64671
NM_004111	FEN1	Homo sapiens flap structure-specific endonuclease 1 (FEN1), mRNA.	1.7697	5.26e-22	8.65533e-18	6.30461	6.28255	6.38958	6.153	6.03054	6.30885	6.49343	6.15873	5.94528	6.37066	5.55536	4.82624	5.37942	4.98216	4.77398	5.50427	5.16094	5.18452	4.73495	5.46083	5.48168	5.19026	5.00958	5.28783	5.66154	4.90452	5.37571	5.16182	5.20326	5.41866	5.38128	5.0128	5.33303	5.34546	4.82818	5.49591	5.20837	5.47138	4.73942	5.5523	5.5397	5.75215	5.70783	5.19896
NM_000593	TAP1	Homo sapiens transporter 1, ATP-binding cassette, sub-family B (MDR/TAP) (TAP1), mRNA.	1.76831	1.83e-14	3.01126e-10	7.63518	8.02094	8.30261	8.18628	8.46448	7.5536	8.69619	6.20459	7.23381	8.03631	6.42764	6.54607	7.38036	7.37294	7.00148	7.61092	7.86233	7.56738	6.3327	7.45675	7.57553	6.81505	6.97505	7.05817	7.96821	5.00421	7.03629	4.9769	6.36705	7.14125	6.69718	6.67788	7.00075	8.42441	6.89973	7.43625	7.3222	7.00951	5.74064	7.13938	7.67056	6.94423	5.92879	6.53459
NM_003535	HIST1H3J	Homo sapiens histone cluster 1, H3j (HIST1H3J), mRNA.	1.76619	3.2e-11	5.2656e-07	6.49501	6.458	6.42275	5.58763	5.43129	5.33995	6.77215	5.95915	5.83153	5.56019	6.20496	4.6322	4.84115	4.50387	4.39926	4.76394	5.33782	4.83497	4.14296	5.22718	5.1679	4.62959	4.7829	5.43333	4.84705	4.36235	5.63464	4.47592	4.51366	5.80801	6.22722	5.23872	5.6785	6.54605	5.71929	5.64879	5.3045	5.08674	5.70994	6.36608	7.26069	6.12065	6.78278	5.80079
NM_024758	AGMAT	Homo sapiens agmatine ureohydrolase (agmatinase) (AGMAT), mRNA.	1.76537	5.05e-13	8.30978e-09	6.35418	6.35241	6.40025	6.44981	6.11529	5.90342	6.3565	6.48211	6.09166	6.55361	6.40064	5.34871	6.8819	5.59961	5.15741	5.53574	5.87165	6.67283	4.76927	5.06208	5.0027	4.63562	4.96328	5.38292	5.11265	5.14351	5.66448	4.77086	5.40629	5.06782	5.5834	5.34205	5.40354	5.78372	5.42596	5.71857	5.71842	5.63394	5.29869	5.32654	5.3641	6.13089	5.71873	5.31862
NM_012472	LRRC6	Homo sapiens leucine rich repeat containing 6 (LRRC6), mRNA.	1.76396	7.81e-10	1.28514e-05	3.9692	4.36473	4.18687	3.67525	5.22324	4.60068	4.2981	2.93059	3.81545	4.38835	3.39641	2.71467	2.40146	2.45833	2.08787	2.55535	2.94515	2.59376	2.47725	2.62922	2.20074	2.55367	2.88805	3.25138	3.49476	1.93827	2.86833	2.4133	3.12705	2.70306	2.28699	3.00907	2.57222	1.58132	1.53694	2.11224	1.84028	2.53011	2.76461	2.61725	2.60362	1.82488	1.68084	1.79814
NM_001079524	PAICS	Homo sapiens phosphoribosylaminoimidazole carboxylase, phosphoribosylaminoimidazole succinocarboxamide synthetase (PAICS), transcript variant 3, mRNA.	1.76309	1.08e-20	1.77714e-16	5.5638	6.2215	5.74529	5.54898	5.46637	5.82423	5.76499	5.16204	5.43387	5.69695	4.22404	3.95287	4.45102	3.6313	4.42453	4.09382	4.43328	4.85739	3.7031	4.22222	4.08238	4.36501	3.90445	4.15691	4.40991	3.33807	4.8034	3.80294	3.91956	3.722	3.88682	3.53574	4.65511	4.87882	4.55497	5.21028	5.3115	4.72781	4.25706	4.42603	4.40899	4.37519	3.34584	3.65442
NM_003220	TFAP2A	Homo sapiens transcription factor AP-2 alpha (activating enhancer binding protein 2 alpha) (TFAP2A), transcript variant 1, mRNA.	1.76247	5.89e-11	9.692e-07	4.76368	4.55459	4.50991	4.64256	4.00979	4.61735	4.59631	4.65284	4.93176	4.79111	5.28337	3.8826	4.08388	3.94692	3.85495	3.57139	3.9365	4.23616	3.56206	3.3819	3.48686	3.3823	3.3116	3.57617	3.52947	3.38445	3.42246	3.15216	2.85162	2.61696	3.24061	3.5061	2.95808	3.35097	3.29297	3.35173	3.24388	3.32646	3.31053	3.46225	3.36707	3.49823	2.91895	3.2089
NM_018965	TREM2	Homo sapiens triggering receptor expressed on myeloid cells 2 (TREM2), mRNA.	1.76203	1.39e-09	2.28725e-05	4.58788	4.13509	5.08119	4.08903	4.57152	4.1047	4.50735	4.38603	3.94232	4.70841	5.41789	3.89682	3.60996	3.97971	3.73925	3.50279	3.36248	3.29166	3.40027	3.31214	3.14191	3.40877	3.41987	3.50562	3.05757	3.97072	1.96321	2.17496	2.04077	1.62081	2.17909	3.33486	3.34779	3.25094	3.35276	2.85057	2.99483	2.79578	2.85605	3.25839	3.54651	3.90382	3.49311	3.39769
NM_017858	TIPIN	Homo sapiens TIMELESS interacting protein (TIPIN), mRNA.	1.7612	9.29e-13	1.52867e-08	4.93183	5.07223	4.81346	4.37461	5.41779	4.37038	4.72124	4.15143	5.05936	6.38687	4.15902	4.45767	4.67083	4.18066	4.82254	4.39161	5.20982	4.64513	3.51281	4.28816	3.94421	3.5728	3.94617	4.32935	3.78411	3.63012	4.27316	4.29044	4.30144	5.16371	4.81553	4.75379	4.78434	3.36741	3.7308	3.71131	3.89479	4.27798	3.40524	5.33138	5.54956	4.38319	4.02485	4.33742
NM_001363	DKC1	Homo sapiens dyskeratosis congenita 1, dyskerin (DKC1), mRNA.	1.75889	1.59e-17	2.61634e-13	6.34317	6.51631	6.56414	6.25337	6.5624	6.64181	6.92228	5.5682	6.56113	7.0167	5.96135	4.96409	5.42899	5.24124	5.55225	5.12034	5.60209	5.50201	5.55734	5.73902	5.61015	5.51557	5.71418	5.58435	5.39186	4.01884	5.80205	6.0009	5.90453	5.70106	5.5704	5.52121	6.27802	6.13757	5.57434	6.27391	6.16949	6.21698	5.42986	5.80888	6.01883	5.83338	5.33722	4.97195
NM_013451	FER1L3	Homo sapiens fer-1-like 3, myoferlin (C. elegans) (FER1L3), transcript variant 1, mRNA.	1.7578	2.71e-14	4.4593e-10	6.89757	8.16958	7.00869	7.37473	7.90301	7.98553	7.53563	5.86567	6.53942	6.88732	6.12596	5.56303	5.87042	5.57507	5.93774	5.45439	6.2698	6.01795	5.68283	5.92256	5.64637	5.79	5.75298	6.02516	6.58702	3.8851	6.99279	6.56436	6.36601	5.59642	6.39769	5.59019	6.46145	5.95905	5.61674	6.47412	7.04099	6.50005	6.75927	5.82715	6.12046	5.77976	4.76303	5.41881
NM_015341	NCAPH	Homo sapiens non-SMC condensin I complex, subunit H (NCAPH), mRNA.	1.7573	2.26e-17	3.71883e-13	5.00385	5.08776	4.91956	4.79538	4.53782	4.1962	4.80732	4.67892	4.57613	4.7096	4.54756	3.26362	3.76375	3.57425	3.57438	3.83771	4.1668	3.87867	3.21704	3.84342	3.98936	3.45623	3.3738	3.88511	3.90815	3.62822	3.32504	2.82481	2.94173	3.12964	3.14529	2.95602	3.41511	4.68709	3.85715	4.23431	4.0303	3.89081	3.58494	4.16486	4.25268	4.08626	4.4744	3.99942
NM_006330	LYPLA1	Homo sapiens lysophospholipase I (LYPLA1), mRNA.	1.75583	1.66e-08	0.000273153	4.36383	3.77565	3.80482	2.75348	4.60764	3.37284	5.72385	2.45425	3.57681	5.33845	2.24045	3.11702	2.00372	3.17383	2.62325	2.27687	3.48923	2.57111	0.885983	2.2439	2.74743	3.99826	2.80279	3.29745	2.07238	0.260207	3.31447	1.27379	3.98889	4.85112	1.79505	2.29372	3.3868	3.48331	2.21985	4.64536	3.44766	2.77984	2.1268	4.54237	3.15951	3.48239	2.75085	1.33044
NM_001012631	IL32	Homo sapiens interleukin 32 (IL32), transcript variant 1, mRNA.	1.75517	1.26e-11	2.07333e-07	7.94766	7.93753	7.8681	8.07779	8.82855	7.48087	7.88194	7.39527	6.78998	7.97926	6.95153	6.86694	8.82686	6.86387	6.84528	7.56023	7.71213	9.05158	6.94882	7.52806	7.29487	6.74363	7.03427	7.06146	7.5094	5.13634	7.09519	6.44385	6.58072	6.88283	7.2304	6.72488	6.86052	7.48415	6.51637	7.54936	7.26335	6.33269	6.3221	7.19902	7.73341	8.12201	7.36307	7.11038
NM_024089	KDELC1	Homo sapiens KDEL (Lys-Asp-Glu-Leu) containing 1 (KDELC1), mRNA.	1.7543	1.05e-13	1.72778e-09	4.2858	5.06468	4.56738	4.56402	5.19814	4.84932	4.80781	4.11272	4.71849	4.6848	4.31547	3.12768	3.26448	2.93042	3.13395	2.8246	3.4822	3.07413	3.403	3.36155	3.41232	3.62312	3.58517	3.58326	3.52785	3.29611	3.42654	3.27571	3.32497	3.21985	2.97423	2.94028	3.32512	3.1779	3.6083	3.45226	3.01983	3.24324	3.46821	3.73624	3.32281	3.37537	3.82353	2.98232
NM_138959	VANGL1	Homo sapiens vang-like 1 (van gogh, Drosophila) (VANGL1), mRNA.	1.75301	3.1e-11	5.10105e-07	5.88721	6.15514	5.84267	6.10205	5.68203	6.00688	5.81896	5.73047	6.31303	5.54448	5.92321	4.25183	4.56151	4.31612	4.71045	4.23069	3.99479	4.35503	4.03573	4.49857	4.31165	4.54652	4.46054	3.85974	4.08981	3.75066	4.91099	4.62116	4.79424	4.44896	4.56823	4.5355	5.0538	5.4122	4.96187	5.0465	5.32115	4.98234	4.71772	4.74491	4.99568	4.43794	4.60746	4.21791
NM_145690	YWHAZ	Homo sapiens tyrosine 3-monooxygenase/tryptophan 5-monooxygenase activation protein, zeta polypeptide (YWHAZ), transcript variant 2, mRNA.	1.75218	9.9e-14	1.62904e-09	6.07311	5.82036	6.05483	5.83096	5.68714	5.83799	5.71806	5.11956	5.06033	6.70245	4.83681	4.77198	4.96791	4.36059	4.6398	4.72089	5.19688	4.80321	4.65096	4.71223	5.9518	5.23938	5.87392	5.26851	4.82541	3.41647	5.33429	4.57436	4.90338	5.55433	4.53391	2.87831	5.71822	5.74726	5.01058	6.00439	6.48616	5.42424	4.62824	5.90236	6.18756	4.46463	4.34532	4.16988
NM_002030	FPRL2	Homo sapiens formyl peptide receptor-like 2 (FPRL2), mRNA.	1.74996	8.67e-11	1.42665e-06	6.28886	7.05127	7.00921	5.42421	6.92893	5.73227	6.63362	4.56126	3.85694	6.24869	4.08347	4.52606	5.39223	4.90209	5.32143	6.25938	5.98371	5.79083	4.5308	5.40763	5.83919	4.91479	5.10528	5.8444	4.524	3.80502	4.6962	4.51145	5.57667	5.50643	5.69449	5.18992	5.48472	5.74079	4.15999	5.48266	5.84953	5.15673	3.36346	6.08398	6.61758	5.42226	5.32788	5.34513
NM_001530	HIF1A	Homo sapiens hypoxia-inducible factor 1, alpha subunit (basic helix-loop-helix transcription factor) (HIF1A), transcript variant 1, mRNA.	1.74962	3.22e-12	5.29851e-08	7.98759	7.81337	8.14242	7.74312	8.12956	7.94841	8.07109	5.64935	7.37232	8.21775	6.93384	6.73913	6.6675	6.25784	7.0214	7.02251	7.4965	6.69547	6.67831	6.59822	6.86497	6.77635	7.48494	6.85013	6.87963	3.78852	7.45134	6.38536	7.39165	7.3838	6.66794	6.19839	7.3106	7.68312	6.48039	7.46807	7.74159	7.08192	6.90515	7.44297	7.50575	6.5454	6.04303	6.10008
NM_001797	CDH11	Homo sapiens cadherin 11, type 2, OB-cadherin (osteoblast) (CDH11), mRNA.	1.74721	7.06e-14	1.16172e-09	6.69652	7.85248	7.12742	7.16437	7.724	7.46679	7.12804	6.30495	6.40613	6.9405	6.54066	5.6281	5.83003	5.62837	6.26768	5.82341	6.21127	6.09221	5.7455	5.59937	6.00855	5.88022	5.86051	5.97603	5.5656	5.21059	6.03752	6.21524	6.34721	5.4931	5.68178	5.35442	6.15738	5.83727	5.50226	6.02001	6.17684	5.83497	6.28422	5.89981	6.03612	5.74321	5.75233	5.32012
NM_002212	EIF6	Homo sapiens integrin beta 4 binding protein (ITGB4BP), transcript variant 1, mRNA.	1.74717	2.17e-17	3.57074e-13	8.18445	8.13128	8.51225	8.37453	7.57644	8.08155	8.21894	6.82435	7.59265	8.30357	7.52492	7.47734	7.50772	7.52328	7.50989	7.20417	6.98105	7.55225	7.80336	7.70507	7.56791	7.35754	7.44574	6.55647	6.72338	5.70581	6.76292	5.66038	6.49324	6.08951	7.08725	6.39982	7.36997	8.38383	7.51953	8.64066	8.4185	8.15197	6.76826	7.19154	7.79873	7.45287	6.45977	6.33363
NM_015339	ADNP	Homo sapiens activity-dependent neuroprotector (ADNP), transcript variant 1, mRNA.	1.74476	6.62e-15	1.08932e-10	6.62371	7.0205	7.24726	7.16003	7.21233	7.49183	6.92166	5.21804	7.30033	7.53907	7.23599	5.74943	6.15627	6.096	6.1706	6.01464	6.6075	6.26549	5.95582	6.22035	6.36718	6.17272	6.54244	6.03387	6.4476	4.43999	6.2105	6.40374	6.4423	6.56394	5.62296	6.40542	7.03565	7.1077	6.69058	6.4456	6.91879	6.97668	6.33209	7.17093	6.87408	6.18622	6.58516	5.80558
NM_001168	BIRC5	Homo sapiens baculoviral IAP repeat-containing 5 (survivin) (BIRC5), transcript variant 1, mRNA.	1.74447	2.4e-18	3.9492e-14	6.1172	5.83208	5.88576	5.82114	5.76138	5.54784	5.88785	5.78344	5.34955	5.44623	5.28198	3.79088	5.25218	4.75938	4.52956	4.93186	4.84008	5.1433	4.28375	4.59266	4.51938	3.85107	4.19198	5.1592	5.0167	4.24544	4.46208	4.1286	4.03804	4.06567	4.36995	4.35712	4.61233	5.13922	4.57235	5.25205	4.68961	4.76846	4.3606	4.57788	4.67733	4.71955	4.77753	4.70707
NM_000493	COL10A1	Homo sapiens collagen, type X, alpha 1(Schmid metaphyseal chondrodysplasia) (COL10A1), mRNA.	1.74425	1.98e-10	3.25809e-06	3.75382	3.92347	3.85833	3.77603	4.12847	3.97897	3.7775	3.92445	3.98825	4.49179	4.99148	3.5619	3.40874	3.35888	3.07034	3.48382	3.39342	3.19596	2.90014	3.14927	2.81551	3.04449	2.73912	3.13002	3.22573	3.48765	2.69182	3.11865	2.4837	2.44148	2.82109	3.77594	3.29021	3.1134	3.27461	3.0602	3.24172	3.30058	3.01568	3.19294	2.97441	3.52966	4.09471	3.37532
NM_001235	SERPINH1	Homo sapiens serpin peptidase inhibitor, clade H (heat shock protein 47), member 1, (collagen binding protein 1) (SERPINH1), mRNA.	1.74296	2.67e-13	4.39348e-09	7.3282	7.71472	7.87116	7.28749	8.66521	7.93638	7.68603	6.65482	6.42795	7.57042	6.62332	6.85492	6.78429	6.80788	6.76185	5.96686	6.91672	6.78735	6.701	6.95128	6.1335	6.47854	6.60417	6.66503	7.83443	5.45511	7.9483	6.00552	6.55659	5.77189	6.72718	5.65339	6.41591	6.49843	6.41143	6.98994	7.12091	6.72948	6.72488	6.02296	6.20277	6.29339	7.33938	5.82727
NM_016229	CYB5R2	Homo sapiens cytochrome b5 reductase 2 (CYB5R2), mRNA.	1.74167	1.13e-16	1.85942e-12	5.09803	5.03151	5.24157	5.07986	5.2819	5.13184	5.02221	4.71627	5.19474	5.83237	5.25747	4.33493	4.17859	4.50197	4.26287	3.96102	4.25974	4.25565	3.87323	4.04736	4.10034	3.33688	4.04558	3.98489	3.93403	3.69073	3.48845	3.51672	3.66199	3.35725	3.97611	4.32304	4.19815	4.28893	4.39158	4.33819	4.22811	4.27413	4.0738	3.75328	4.19976	3.686	4.11429	3.86089
NM_020384	CLDN2	Homo sapiens claudin 2 (CLDN2), mRNA.	1.74154	3.05e-08	0.000501878	4.2878	4.99328	4.49641	5.18445	5.3496	4.02713	4.60105	4.48934	3.94712	4.80473	4.72853	2.83414	3.70556	3.39434	3.01479	3.51572	3.20808	3.72227	2.37005	2.72739	2.56947	2.66773	2.71136	3.6652	2.90467	3.07998	3.41635	3.45644	4.6143	3.30397	3.57114	3.94097	2.99706	2.96091	3.22716	2.77487	3.29741	3.1175	4.04182	3.32594	3.17282	4.10327	3.32471	3.48641
ENST00000343597	FAM111B	family with sequence similarity 111, member B (FAM111B), mRNA gene:ENSG00000189057	1.73929	2.14e-13	3.52137e-09	4.481	4.99325	3.93941	4.46498	3.42579	3.93932	4.3834	3.72509	3.49314	4.60308	4.74085	2.38515	3.30148	2.26314	2.62655	3.07476	2.68108	3.08533	2.49547	2.58063	3.15581	2.31528	2.6342	3.28256	3.33129	2.22018	2.83256	2.7727	2.5475	2.71445	2.90832	2.65359	2.77098	2.6835	2.64209	3.49738	2.84721	2.99738	2.25801	3.83763	4.42629	3.19623	3.03948	3.11694
NM_001316	CSE1L	Homo sapiens CSE1 chromosome segregation 1-like (yeast) (CSE1L), mRNA.	1.73792	6.78e-14	1.11565e-09	5.96177	6.71045	6.6635	6.20004	6.54432	6.65693	6.37248	4.94726	6.33938	7.07826	5.51862	5.06538	4.69244	5.11163	5.32176	5.16795	5.90902	4.87995	4.83968	5.39751	5.39156	5.3098	5.80014	5.21602	5.55624	3.10707	5.62124	5.74161	5.70517	5.91581	5.45936	4.80123	6.16743	6.04103	5.43764	6.24986	6.09444	6.00025	5.34744	6.1053	5.81057	4.93615	5.39839	4.2968
NM_007280	OIP5	Homo sapiens Opa interacting protein 5 (OIP5), mRNA.	1.73568	1.09e-13	1.79359e-09	5.04937	4.78195	4.76393	4.72028	4.42618	4.55905	4.84178	4.65494	4.24348	5.40564	5.43584	4.34259	4.32323	4.23881	3.99569	4.10341	4.06409	4.42159	3.98369	4.2011	4.11143	3.99835	3.77449	4.39137	3.79203	3.80755	3.8492	4.01797	4.33335	4.10482	4.79521	4.52219	3.73625	4.34304	3.84082	3.74836	3.63178	4.00994	3.30585	4.41487	4.27646	4.22132	4.71823	4.38293
NM_017947	MOCOS	Homo sapiens molybdenum cofactor sulfurase (MOCOS), mRNA.	1.73552	8.28e-15	1.36247e-10	4.85844	4.9341	4.59766	4.99145	4.89171	4.77162	4.84059	4.77441	4.82471	5.08733	4.9055	3.79579	4.73047	3.91326	3.90082	4.16465	3.94206	4.50445	3.42111	3.28403	3.45389	3.29712	3.61714	3.52935	3.56809	3.37936	3.5554	2.90069	3.07611	2.96685	3.1476	3.52982	3.70891	4.09407	3.62105	4.05771	3.83996	4.08257	3.45106	3.45907	3.48633	4.28489	3.02138	3.44029
NM_178517	PIGW	Homo sapiens phosphatidylinositol glycan anchor biosynthesis, class W (PIGW), mRNA.	1.73531	9.25e-17	1.52209e-12	4.77514	4.60714	4.5713	4.63116	4.70769	4.59559	4.47661	3.66141	4.20921	4.71518	4.20319	2.96576	3.32726	3.173	3.43269	3.18297	3.47056	3.22581	2.64091	2.90822	2.83551	2.92644	2.9044	3.28175	3.08073	2.40313	2.8639	3.16409	3.03719	2.99214	2.78521	3.29934	3.89609	3.88638	3.10661	4.2963	3.92863	3.89463	2.78206	3.13311	3.67431	3.14389	3.51129	2.69908
NM_001912	CTSL1	Homo sapiens cathepsin L1 (CTSL1), transcript variant 1, mRNA.	1.73357	7.42e-10	1.22096e-05	7.65751	7.9727	8.0005	7.60171	9.28983	8.12888	8.04326	6.41518	6.62388	8.70881	6.45713	6.95226	7.02777	6.6875	7.08999	6.95284	7.81209	7.16279	7.07833	7.53407	6.48967	7.0783	7.47708	8.4793	7.87142	4.63865	8.41532	7.23213	7.95758	7.17957	7.81202	6.91414	7.16358	7.06325	5.81011	7.54871	7.20895	7.2672	7.78547	6.83451	6.91572	6.3423	6.7131	5.75431
NM_001814	CTSC	Homo sapiens cathepsin C (CTSC), transcript variant 1, mRNA.	1.73258	4.32e-14	7.10856e-10	7.29728	7.79541	7.97724	7.51963	8.13383	6.75399	7.70886	6.42349	6.72391	7.81163	6.95899	6.90716	7.41489	6.43079	6.78527	7.92986	7.80763	7.64329	6.84154	7.11616	7.32476	6.48565	7.07525	7.43109	6.82841	4.26801	6.93635	6.0415	6.85686	7.49372	6.83147	6.89384	7.28281	7.50719	6.54853	7.46584	7.66001	6.84186	5.61886	7.57326	8.26937	7.33159	6.72534	6.99891
NM_013989	DIO2	Homo sapiens deiodinase, iodothyronine, type II (DIO2), transcript variant 1, mRNA.	1.73203	1.13e-11	1.85941e-07	4.0158	4.37249	4.31144	4.385	4.79448	3.91459	4.22837	3.96982	4.00618	4.5506	5.20734	3.61439	3.44817	3.79467	3.46707	3.81196	2.9832	3.58997	3.10687	3.05597	3.2926	3.32961	2.62841	4.21976	3.3918	3.14521	3.24319	3.91608	3.8063	3.4446	3.41899	2.76091	3.23868	3.27418	3.31411	3.25881	3.61525	3.28754	3.24075	3.12759	3.16553	3.12759	3.3884	2.82775
NM_012474	UCK2	Homo sapiens uridine-cytidine kinase 2 (UCK2), mRNA.	1.73147	1.38e-15	2.27079e-11	7.69055	7.74049	7.8637	7.82145	7.41825	7.3734	7.69383	6.85879	7.99585	8.51852	7.501	7.17819	7.27186	7.07406	7.45955	6.98669	7.19731	7.24017	7.1245	7.14049	7.26884	7.55224	7.27423	6.75653	6.32771	5.45285	6.78726	5.54422	6.50992	6.34262	6.59321	6.91948	7.22371	7.72875	7.17053	7.68566	7.47498	7.56287	7.10613	6.86491	7.24275	6.77232	6.16503	6.48233
NM_000305	PON2	Homo sapiens paraoxonase 2 (PON2), transcript variant 1, mRNA.	1.73118	4.77e-14	7.84904e-10	7.31516	8.46496	7.74107	7.67974	8.37747	8.21742	7.26789	6.41246	7.41077	7.59272	6.96478	6.64256	7.62723	6.49734	7.2668	7.32578	7.67296	7.85583	6.68617	6.70866	6.98781	7.10001	6.84385	7.10692	7.12471	5.18083	7.46912	7.06348	7.28524	6.37293	7.06077	6.20683	7.13224	7.35787	6.9082	7.00974	7.0891	7.31684	7.80134	7.20761	7.05554	7.08913	7.34782	6.20806
NM_024953	C12orf30	Homo sapiens chromosome 12 open reading frame 30 (C12orf30), mRNA.	1.72796	1e-19	1.6455e-15	4.48129	5.0492	4.68308	4.56853	4.47044	5.23408	4.94282	3.76087	4.91079	5.25019	5.20544	3.05725	2.92335	3.36911	3.20065	2.89778	3.64251	3.11228	2.77925	2.96595	2.96272	3.26045	3.52693	3.23174	3.8877	2.57161	3.24537	3.59305	3.18666	3.56451	2.83061	3.51989	4.2628	4.11052	3.93234	4.00479	3.94878	3.75409	4.0704	4.02196	4.12089	3.29884	3.17354	2.90025
NM_006461	SPAG5	Homo sapiens sperm associated antigen 5 (SPAG5), mRNA.	1.72779	2.31e-15	3.8011e-11	4.86697	4.75209	4.71852	4.4819	4.48457	4.48884	4.72222	4.66649	4.5176	4.53146	4.33162	3.43482	3.94756	3.51518	3.37236	3.48582	3.54395	4.04469	3.11383	3.32814	3.24778	3.04573	3.24035	3.85477	3.64348	3.50815	3.80677	3.14907	2.98055	3.29363	3.067	3.10995	3.23978	3.47935	3.29694	3.71544	3.15906	3.17284	3.26205	3.5106	3.86316	4.06438	4.04642	3.71377
NM_080596	HIST1H2AH	Homo sapiens histone cluster 1, H2ah (HIST1H2AH), mRNA.	1.72752	2.26e-11	3.71883e-07	5.57044	6.29804	6.10589	5.73834	4.33391	5.67236	6.00801	5.69162	5.64535	5.8862	5.71036	4.60809	4.45934	4.8979	3.95979	4.19099	3.25777	4.93993	3.89674	5.39352	5.32636	4.79574	5.2676	5.80254	4.55979	5.41366	4.27866	4.41341	4.36334	5.46054	4.937	5.43731	4.98383	6.3861	4.1241	5.09226	4.65104	5.19166	4.56726	5.05336	6.21491	6.23549	6.18188	5.84087
NM_003272	GPR137B	Homo sapiens G protein-coupled receptor 137B (GPR137B), mRNA.	1.72498	2.8e-11	4.6074e-07	6.34999	7.0881	7.07397	6.60884	7.55579	6.76038	6.54023	5.07522	6.04951	6.86406	5.55878	5.27601	5.90116	5.23554	5.75804	6.23397	6.60382	6.00405	4.72082	5.48151	5.91338	5.57319	5.42985	5.96194	5.16527	3.0896	5.53526	4.67839	5.62134	6.22272	5.23458	5.74706	5.77767	5.87284	5.3073	5.479	5.8901	5.40602	4.90942	6.59298	6.51093	5.7721	5.25177	5.44725
NM_019894	TMPRSS4	Homo sapiens transmembrane protease, serine 4 (TMPRSS4), transcript variant 1, mRNA.	1.72298	2.15e-06	0.0353782	7.02897	7.51749	7.84215	7.85361	5.45185	6.36096	7.33777	5.55497	6.38556	6.96032	5.73958	5.46374	7.70437	6.19266	6.96819	7.40327	5.60954	7.88707	5.28261	6.79314	7.269	6.75633	7.11053	6.60578	6.70037	4.9241	7.23017	4.28103	5.07238	4.8683	5.98992	4.62443	6.07959	5.77462	6.23972	7.90367	7.89593	6.97307	4.43716	6.85143	7.42456	7.07103	5.67076	6.46712
NM_023009	MARCKSL1	Homo sapiens MARCKS-like 1 (MARCKSL1), mRNA.	1.7217	1.38e-18	2.27079e-14	8.04643	8.2781	8.26666	8.01252	7.66718	7.99369	8.19602	7.84825	7.96176	9.08557	9.51111	7.74993	7.70927	7.8523	7.96121	8.00589	7.12827	7.93136	7.46171	7.44508	7.66844	7.42478	7.47187	7.35866	6.88377	7.28418	7.81777	6.96169	7.46144	7.16903	7.47977	7.61538	7.94355	8.46125	8.21477	8.24208	8.41455	8.4201	8.50458	8.17679	7.99221	7.98679	6.80638	7.82128
NM_031217	KIF18A	Homo sapiens kinesin family member 18A (KIF18A), mRNA.	1.72107	7.43e-17	1.22261e-12	2.71219	3.35253	2.72405	2.45534	2.06724	2.42658	2.40014	2.52617	3.03605	2.72006	3.41513	1.29384	1.24123	1.1277	1.30485	1.3883	1.39741	1.36931	1.33942	1.49141	1.68054	1.39933	1.26837	1.58248	1.70045	1.20309	1.90223	1.80319	1.49927	1.51222	1.44198	1.84085	1.7268	1.94711	1.9844	1.85914	1.8148	2.00555	1.83005	2.1595	2.00624	2.07454	2.82956	1.56395
NM_003982	SLC7A7	Homo sapiens solute carrier family 7 (cationic amino acid transporter, y+ system), member 7 (SLC7A7), mRNA.	1.72007	2.32e-11	3.81756e-07	5.30749	5.73801	5.90558	5.64077	6.39455	5.54568	5.87697	4.63469	4.79115	5.28955	4.44833	4.25082	6.68635	4.4065	4.45716	5.10488	5.16531	6.84699	4.22741	5.21992	5.12376	4.57468	5.02379	5.45565	4.86628	3.85374	4.08059	3.52288	4.23766	4.28494	4.51317	4.23178	4.8783	4.99175	3.77036	4.70136	4.69495	4.21007	3.49024	4.59422	5.26698	6.123	4.7756	3.98155
NM_003338	UBE2D1	Homo sapiens ubiquitin-conjugating enzyme E2D 1 (UBC4/5 homolog, yeast) (UBE2D1), mRNA.	1.71957	8.06e-13	1.32627e-08	4.99103	6.20788	5.70424	5.51656	7.15997	5.89335	5.88029	4.34975	4.7141	6.941	4.76791	4.31035	4.78851	4.65314	4.66721	5.10877	6.10369	5.12143	4.18923	4.88406	5.12837	4.84081	5.58834	4.8999	4.74651	2.82075	4.52215	4.20574	4.75345	4.74452	4.72183	4.333	5.0697	4.83083	3.75353	5.01225	5.13003	4.94462	3.95497	5.16796	5.71474	4.29831	5.69436	4.46411
NM_002895	RBL1	Homo sapiens retinoblastoma-like 1 (p107) (RBL1), transcript variant 1, mRNA.	1.71872	3.84e-17	6.31872e-13	5.25926	5.72766	5.55974	5.58179	5.64008	5.51583	5.70646	4.7133	5.17651	5.519	5.0148	3.84524	3.97685	3.78138	3.98923	4.14445	4.36079	4.0088	3.41859	3.68165	3.95791	3.80577	3.63529	4.49311	4.51668	3.02448	4.07118	4.44031	4.2496	4.40762	3.44327	3.82596	4.28219	4.38743	4.08324	4.64144	4.54724	4.58424	4.17759	4.91513	4.58178	3.89629	3.98451	3.71594
NM_020169	LXN	Homo sapiens latexin (LXN), mRNA.	1.71866	1.62e-07	0.00266571	4.00614	4.93051	4.72035	4.33599	6.08281	4.61184	4.45575	3.93251	4.29756	6.04657	4.49658	3.23557	3.88496	3.41588	3.66501	3.9858	5.43043	3.37644	3.47811	3.61527	3.47817	3.62313	4.3917	4.59992	3.35236	2.59469	3.70198	3.66192	3.29513	3.54936	3.43006	3.1052	3.4519	2.82066	2.32569	3.24333	2.76636	2.58612	2.02895	4.57054	4.92213	4.00899	2.44256	2.77428
NM_000206	IL2RG	Homo sapiens interleukin 2 receptor, gamma (severe combined immunodeficiency) (IL2RG), mRNA.	1.7185	6.84e-07	0.0112552	6.69159	6.97502	6.99023	6.67826	6.99442	5.84772	7.34387	5.23947	5.74468	6.77968	6.11355	5.50742	6.65159	5.32883	6.03253	7.32627	6.5269	6.86653	5.6868	6.49878	6.72802	5.91169	6.06958	5.94021	5.73727	3.6676	5.98715	3.8396	5.06713	6.54303	5.37978	5.73834	6.33963	6.94922	5.51416	6.8796	6.70434	5.60477	4.54023	7.21804	7.35379	6.9518	5.55574	6.34254
NM_003129	SQLE	Homo sapiens squalene epoxidase (SQLE), mRNA.	1.71743	7.94e-12	1.30653e-07	6.3485	6.35307	5.98359	6.41154	6.15719	5.71118	6.31271	5.49172	6.77225	7.0064	5.10536	4.94007	5.52144	5.26603	4.36707	5.06822	4.82375	5.73656	4.77839	5.60438	5.19934	4.59622	5.1531	5.29406	4.99897	4.31446	5.4529	4.67573	5.98719	5.53076	5.46317	4.44915	5.45646	5.60767	4.7596	6.47701	5.54604	5.39068	4.71193	6.40145	6.1403	5.71317	5.7148	4.79868
NM_018353	C14orf106	Homo sapiens chromosome 14 open reading frame 106 (C14orf106), mRNA.	1.71731	1.25e-17	2.05688e-13	4.04127	4.57093	4.48149	4.25292	5.22626	4.79396	4.84809	3.58885	4.32906	4.84577	4.09296	2.66552	2.42314	2.28674	2.52343	3.03618	3.2328	2.39098	1.72737	2.17484	2.37289	2.25315	2.41537	2.65175	3.10409	1.89043	3.00223	2.81027	3.12567	3.38889	2.76278	3.15991	3.86893	3.4474	3.25594	3.32574	3.36893	3.10423	3.26217	3.82918	3.89805	2.57769	2.87046	2.22013
NM_001326	CSTF3	Homo sapiens cleavage stimulation factor, 3' pre-RNA, subunit 3, 77kDa (CSTF3), transcript variant 1, mRNA.	1.71701	1.24e-17	2.04042e-13	3.91489	5.00037	4.50655	4.20072	4.39925	4.67045	4.39831	3.91809	4.86185	5.03752	5.09044	3.13148	3.42644	3.36694	3.72595	3.76666	4.00146	3.54256	2.86119	3.49333	3.86489	3.46675	3.69358	3.86792	3.93179	2.97212	4.06517	3.90522	3.7233	3.90984	3.36346	4.00893	4.37224	4.02287	3.78001	4.04554	3.79213	3.73556	3.91622	4.58652	4.91439	3.6917	3.8315	3.24079
NM_017906	PAK1IP1	Homo sapiens PAK1 interacting protein 1 (PAK1IP1), mRNA.	1.71532	5.64e-16	9.28062e-12	5.8285	6.25071	5.99844	5.58552	6.57434	5.95516	5.8839	4.92491	5.81717	6.73979	4.4023	4.94297	4.71798	4.45579	4.97933	4.94505	5.6045	4.77712	4.64204	5.28366	4.62619	4.86161	5.27643	5.40987	4.35398	3.38216	5.21793	5.20592	4.98338	4.98704	5.16542	5.0602	5.237	5.67461	4.63434	5.532	5.49235	5.37186	4.72836	5.08021	5.12216	4.50992	4.36814	4.1794
NM_005573	LMNB1	Homo sapiens lamin B1 (LMNB1), mRNA.	1.71526	3.58e-17	5.89089e-13	6.06301	6.55408	6.55882	6.29213	6.69769	5.86847	6.42539	5.8636	5.4396	6.51057	6.03334	4.6685	5.34574	4.77631	4.99881	5.13946	5.67554	5.41288	4.27188	5.11979	5.02739	4.46369	5.05945	5.45829	5.43582	4.38552	5.32809	4.9906	4.84596	5.20688	5.26356	4.47036	5.01178	5.83092	5.43538	5.69494	5.01472	5.12083	5.02842	5.60212	5.4618	5.56604	5.22709	5.22709
NM_001333	CTSL2	Homo sapiens cathepsin L2 (CTSL2), mRNA.	1.71515	2.5e-09	4.11375e-05	4.44079	4.18916	4.24561	4.69371	3.98603	4.36132	4.10011	4.60778	4.54941	5.18124	4.84499	3.7299	3.66429	4.05769	4.08425	3.78409	3.59846	3.41208	2.86871	3.21642	2.81366	3.21531	3.31407	3.2056	2.77979	3.57406	2.91544	2.45942	2.39615	3.01189	3.49125	3.19074	2.83823	2.608	2.90041	3.10845	3.10341	3.0427	2.40121	3.29756	3.14633	3.11793	4.11608	2.98722
NM_001935	DPP4	Homo sapiens dipeptidyl-peptidase 4 (CD26, adenosine deaminase complexing protein 2) (DPP4), mRNA.	1.71383	2.82e-08	0.000464031	4.58451	5.25221	5.13321	5.50019	5.82208	4.97298	4.63629	4.17356	4.31111	4.7853	4.03473	3.77814	6.07882	3.20777	3.80271	4.26145	4.50956	6.42509	3.53368	3.46239	3.39685	3.67313	2.99564	4.80471	4.69344	3.1259	4.60157	3.5889	4.06347	3.24474	3.57598	3.83764	3.82914	3.99131	3.4238	3.93779	4.39427	4.52974	3.47651	3.80333	4.04008	5.83258	4.00108	3.06276
NM_021052	HIST1H2AE	Homo sapiens histone cluster 1, H2ae (HIST1H2AE), mRNA.	1.71327	1.9e-10	3.12645e-06	6.98071	7.49225	7.19442	7.14024	6.45461	5.91283	7.34813	4.69302	4.90576	6.18907	6.54514	5.62379	6.73034	5.3094	6.0245	6.5696	7.15968	6.38433	5.39952	6.54752	6.37015	5.91751	5.92346	6.54169	5.43977	4.04481	5.55277	4.42913	5.03522	6.136	6.38257	5.82371	6.08953	6.25502	5.4362	6.15958	5.40674	5.18091	5.39283	7.0072	7.62271	7.56183	5.85703	6.40049
NM_001008938	CKAP5	Homo sapiens cytoskeleton associated protein 5 (CKAP5), transcript variant 1, mRNA.	1.713	6e-14	9.873e-10	5.96724	6.87726	6.37806	6.51829	6.42776	7.07971	6.65091	5.21943	6.4475	6.16848	5.89323	4.73556	4.86719	5.05878	5.05701	5.07296	5.06678	5.0341	4.84475	4.89192	5.23517	4.88393	5.08618	5.07726	5.49941	3.19922	5.48872	5.70089	5.54243	5.48355	4.88876	4.90028	5.58563	5.75052	5.65578	5.77061	5.82859	5.63034	5.53319	5.47001	5.28456	4.9447	4.86613	4.56039
NM_031299	CDCA3	Homo sapiens cell division cycle associated 3 (CDCA3), mRNA.	1.71284	4.23e-16	6.96046e-12	5.34674	5.59501	4.92076	5.13364	4.59068	4.97563	4.97508	4.70368	4.24855	4.78642	4.75681	4.47944	5.14909	3.79227	4.16691	4.3717	4.43596	5.41091	3.90741	4.32715	3.46289	3.63019	3.76431	3.8087	3.81392	3.19414	4.12128	3.58644	3.13348	3.50929	4.38321	3.81639	3.82997	4.68425	4.17361	4.24547	4.02029	4.17289	4.03994	4.35813	5.03938	4.86825	5.2176	4.59043
NM_012413	QPCT	Homo sapiens glutaminyl-peptide cyclotransferase (glutaminyl cyclase) (QPCT), mRNA.	1.71275	7.57e-09	0.000124564	4.48675	4.81091	4.61559	4.28556	5.93604	4.79005	4.78249	4.126	4.19122	5.32776	4.83765	2.98107	3.44027	3.2501	3.07318	3.32659	4.42062	3.4644	2.83624	3.39521	3.12905	3.35772	4.12203	3.43506	3.2555	3.1209	2.78698	2.63485	2.52996	2.40491	2.59005	3.08493	3.29878	3.52942	2.99909	3.253	3.54085	3.58709	3.32331	3.42273	3.38477	3.28009	3.36475	3.21197
NM_001031683	IFIT3	Homo sapiens interferon-induced protein with tetratricopeptide repeats 3 (IFIT3), mRNA.	1.71244	1.13e-08	0.000185941	5.66798	7.45795	7.25885	6.73848	7.90434	7.30067	7.69113	4.81822	5.7416	7.53452	5.66656	5.04097	4.92	6.75335	5.6574	5.54033	6.33239	5.15838	5.29189	5.22123	5.34653	5.53552	6.2188	7.44954	5.88919	2.92195	4.86443	3.97306	5.37183	5.057	5.98791	4.38112	6.14325	5.92692	6.07403	6.77571	6.09377	6.92986	4.00087	5.61721	5.91562	3.68396	3.87338	2.8435
NM_001040876	ABCE1	Homo sapiens ATP-binding cassette, sub-family E (OABP), member 1 (ABCE1), transcript variant 2, mRNA.	1.71234	2.15e-12	3.53783e-08	5.98465	6.69417	6.42536	5.87488	6.40031	6.63105	6.46252	4.19779	5.77093	6.54943	5.49703	4.43507	4.83528	4.35984	5.17088	4.27256	5.33554	4.53977	4.28535	4.64378	4.72005	5.27034	4.91196	5.21427	5.16841	3.11575	6.27762	6.10518	5.3712	5.70097	5.18098	5.67455	6.0344	6.63337	5.34503	6.64587	6.69844	5.88467	5.68692	6.66729	6.34552	5.03002	6.41539	3.99073
NM_006681	NMU	Homo sapiens neuromedin U (NMU), mRNA.	1.712	3.25e-10	5.34788e-06	4.86601	4.8274	5.04427	5.09553	4.5828	4.57027	4.88623	5.33282	4.73991	5.21706	5.15868	3.54333	3.77876	3.56118	3.5974	4.07608	3.87451	3.73548	3.02329	3.09259	3.08182	2.97173	3.4065	3.70294	3.30322	3.31553	4.21392	4.04041	3.58505	3.55449	4.37577	4.8879	3.55019	3.62353	3.68414	3.46572	3.62351	3.59497	3.72779	3.42248	3.14708	3.57132	3.64578	3.74914
NM_015984	UCHL5	Homo sapiens ubiquitin carboxyl-terminal hydrolase L5 (UCHL5), mRNA.	1.70963	8.31e-11	1.36741e-06	5.15254	6.38924	5.77085	5.52038	6.17475	5.67396	5.73651	4.16609	5.9662	6.35153	5.59141	5.14565	5.16216	4.65946	5.44628	5.08022	5.23818	5.16398	4.23356	4.57378	4.72486	5.16723	4.35347	4.67536	3.82914	3.39518	4.31875	4.05806	4.35738	4.50481	4.02337	4.6431	4.65952	4.95297	4.56452	4.88762	4.64644	4.65982	4.72834	5.21874	4.60658	3.95658	3.27681	3.89726
NM_000064	C3	Homo sapiens complement component 3 (C3), mRNA.	1.7096	5.98e-07	0.00984009	8.41744	9.67364	9.42206	8.98299	11.0268	9.14724	8.9846	6.54674	7.14608	9.0002	7.63051	8.8836	7.77666	7.03266	8.44145	8.88578	9.34738	7.85485	9.2079	8.07187	7.72662	8.21477	9.03446	8.60307	9.38762	4.78863	9.32634	8.24764	8.70472	7.52607	7.73599	6.91436	7.45061	8.53391	7.05452	7.87689	8.81846	8.23669	8.28535	7.55403	7.72879	7.42652	7.05679	7.97479
NM_002466	MYBL2	Homo sapiens v-myb myeloblastosis viral oncogene homolog (avian)-like 2 (MYBL2), mRNA.	1.70909	1.15e-16	1.89232e-12	6.63204	6.42056	6.2163	6.22598	5.88854	5.71425	6.75423	6.00104	5.76645	6.15337	6.16694	5.26839	6.03104	5.19059	4.96576	5.50043	5.4311	5.94592	4.38367	4.97599	5.10284	4.27918	4.60315	5.04099	5.29743	4.90304	5.50061	4.81474	4.71689	5.53835	5.46288	4.95214	4.97192	5.96508	5.45912	5.95946	5.38899	5.72739	5.33867	5.40905	5.71924	5.46357	6.45728	5.81288
NM_001769	CD9	Homo sapiens CD9 molecule (CD9), mRNA.	1.70821	9.38e-12	1.54348e-07	8.48638	9.09727	8.61089	8.73589	10.0811	9.26381	8.58737	7.06714	7.83215	9.54022	7.179	7.16189	8.74918	7.63337	7.64327	7.78526	8.8663	8.83814	7.53223	8.5784	7.4359	7.46297	8.33121	7.84154	7.63965	4.76145	8.26509	8.29181	8.98272	7.11031	8.87035	7.73834	8.38525	7.42983	6.43482	7.79706	8.41903	7.97731	7.96277	7.91423	8.4035	8.45719	7.29473	7.46693
NM_002164	INDO	Homo sapiens indoleamine-pyrrole 2,3 dioxygenase (INDO), mRNA.	1.70685	9.19e-08	0.00151221	4.13508	5.47974	5.78878	4.89374	6.55399	3.90881	5.35402	4.25411	4.2438	4.78054	4.79352	3.38847	3.92636	3.907	3.78883	4.04539	5.57877	3.56334	3.54083	4.99731	3.92068	3.96945	3.54991	5.40708	6.04432	3.37724	3.43731	3.29482	3.37206	4.00767	3.91521	3.48226	3.22009	4.82264	3.7442	3.48237	3.6135	3.35121	2.75813	4.82894	4.94067	3.86732	3.81075	3.81075
NM_005151	USP14	Homo sapiens ubiquitin specific peptidase 14 (tRNA-guanine transglycosylase) (USP14), transcript variant 1, mRNA.	1.70594	1.18e-15	1.94169e-11	6.34287	6.95862	6.77642	6.67918	6.94795	7.21717	6.83225	5.12263	6.41752	6.96053	5.7514	5.03936	4.82693	5.12984	5.26003	4.80654	5.14742	5.45216	5.35887	5.75208	5.36914	5.71677	5.72675	5.32116	6.09121	2.75081	5.7989	5.63824	5.99366	5.61719	5.53137	4.84299	6.20767	6.31359	5.47504	6.12658	5.98781	5.88681	5.86254	5.81219	5.76616	4.78988	4.41745	4.67522
NM_173582	PGM2L1	Homo sapiens phosphoglucomutase 2-like 1 (PGM2L1), mRNA.	1.70266	5.4e-16	8.8857e-12	5.41463	5.48234	5.48667	5.25702	6.0832	5.40536	5.44866	4.58635	5.25324	5.59873	4.92399	3.99598	4.05332	3.91803	4.03617	4.00181	4.38358	3.7909	3.80999	4.08447	3.65462	4.09019	4.05231	4.628	4.07199	3.9013	4.29023	4.36494	4.66541	4.35159	3.9966	4.23207	4.52936	4.41173	4.11683	4.57425	4.18572	4.44377	4.09826	4.71828	4.4031	4.10136	5.55682	4.11585
NM_175924	ILDR1	Homo sapiens immunoglobulin-like domain containing receptor 1 (ILDR1), mRNA.	1.70131	6.95e-12	1.14362e-07	5.70488	5.88991	5.79353	5.76592	5.77302	5.50297	5.5764	5.89669	5.5115	6.08815	6.19907	4.53948	4.55534	4.53186	4.45122	4.32636	4.45122	4.69592	3.73013	4.08699	3.90172	3.87534	4.16457	4.3387	4.04863	4.32949	4.11498	4.19779	4.72372	3.83129	4.19883	4.43764	4.04009	4.2009	4.22544	4.07253	4.16206	4.24754	4.02715	4.39732	4.33849	4.68809	4.87307	4.51002
NM_014321	ORC6L	Homo sapiens origin recognition complex, subunit 6 like (yeast) (ORC6L), mRNA.	1.70034	1.57e-19	2.58344e-15	4.77186	4.53099	4.56684	4.59635	4.23747	4.43119	4.42528	4.10872	4.46256	5.10637	5.18287	3.01728	3.69309	3.28926	3.12442	3.40666	3.13475	3.59057	3.23219	3.09199	3.15186	3.29707	3.14359	3.40173	3.02326	3.2757	2.66471	2.67278	2.53405	2.58964	2.60556	3.58073	3.10839	3.09568	3.03357	3.01284	3.30086	3.18551	2.91755	3.27222	3.68407	3.3352	3.32824	3.27998
NM_021062	HIST1H2BB	Homo sapiens histone cluster 1, H2bb (HIST1H2BB), mRNA.	1.69956	3.77e-07	0.00620353	2.98442	4.64652	3.55959	2.84195	2.1253	1.77439	2.69574	1.35133	1.2773	2.43748	3.11718	1.57613	2.13382	0.557741	1.90613	2.51751	2.06756	0.884603	0.870613	1.40619	2.11216	0.672527	2.38259	2.4022	1.18473	0.773508	1.69341	2.00455	1.59295	4.47382	1.94657	2.32486	2.55031	4.34344	1.40531	2.67363	1.86029	2.00291	1.85336	3.76689	4.95728	2.58535	2.56682	2.60988
NM_001845	COL4A1	Homo sapiens collagen, type IV, alpha 1 (COL4A1), mRNA.	1.69942	1.27e-14	2.08978e-10	7.31909	7.89453	7.18601	7.3619	8.50511	8.40162	7.43266	6.8203	6.88957	7.21996	6.83589	6.41615	6.30448	6.10132	6.2353	6.31431	6.7698	6.29108	6.38312	6.47485	5.61769	6.06181	6.32298	6.00152	7.1157	5.32766	7.44989	6.85651	6.54808	5.5698	6.5568	5.69196	6.41683	5.99434	5.97888	6.55234	6.71534	6.28347	7.39759	5.5322	5.90491	5.83622	6.44164	5.66002
NM_001904	CTNNB1	Homo sapiens catenin (cadherin-associated protein), beta 1, 88kDa (CTNNB1), mRNA.	1.69829	7.95e-14	1.30817e-09	8.13108	8.98766	8.81091	8.41744	9.08166	8.83779	8.32283	6.26435	7.91826	9.02294	7.65975	7.23037	7.57543	7.61686	7.83745	7.69053	8.17524	7.72118	6.55993	7.57765	7.71845	7.50963	7.61576	7.62761	7.53905	4.36121	7.78895	6.83407	7.4542	7.02354	7.10211	6.53285	7.92496	8.22111	7.62258	7.97494	8.22147	7.79869	7.73548	8.39497	7.91346	7.57064	6.94096	6.22753
NM_022127	SLC28A3	Homo sapiens solute carrier family 28 (sodium-coupled nucleoside transporter), member 3 (SLC28A3), mRNA.	1.69808	5.49e-07	0.0090338	3.97724	4.38559	4.6353	4.18405	4.19676	3.70225	4.25048	3.73901	3.92102	4.13706	4.30937	3.12633	2.80821	2.99912	2.97621	3.621	2.99223	3.11965	2.48537	2.65852	2.61066	2.79497	2.51677	4.22153	3.76446	2.89531	4.00284	2.74321	5.38915	2.63298	2.46875	3.22749	2.84883	2.80585	3.13507	2.63062	2.89398	2.80434	4.92574	3.23748	2.84885	2.95252	3.86546	3.04685
NM_004530	MMP2	Homo sapiens matrix metallopeptidase 2 (gelatinase A, 72kDa gelatinase, 72kDa type IV collagenase) (MMP2), mRNA.	1.69565	2.5e-08	0.000411375	8.21657	8.34783	8.67237	8.41784	10.0307	9.09879	8.07212	7.04208	7.36797	8.84302	7.5889	7.76206	7.43511	7.21976	8.00386	7.8255	8.36715	7.51663	8.03602	7.71922	7.26998	7.63281	8.12464	6.79917	7.33728	4.84893	7.46235	7.38612	7.29887	6.90449	8.49772	7.04788	7.91969	7.60874	6.67754	7.84164	8.24794	7.94179	6.83968	7.28498	7.60252	7.21872	6.45517	7.02551
NM_006281	STK3	Homo sapiens serine/threonine kinase 3 (STE20 homolog, yeast) (STK3), mRNA.	1.69561	2.23e-15	3.66947e-11	4.76427	5.92095	5.48464	5.03771	6.06643	6.17164	5.38068	4.00577	5.20386	5.96796	5.46697	4.35045	4.22191	3.70325	4.65179	4.1151	4.89868	4.37365	4.41838	4.19176	3.975	4.3448	4.44524	4.61591	5.00908	3.05933	5.20392	5.58465	5.26694	5.54945	4.84283	4.17964	4.93778	4.69493	4.43635	4.66333	4.85435	4.99715	5.38801	4.61938	4.47962	3.85577	3.88545	3.25122
NM_032997	ZWINT	Homo sapiens ZW10 interactor (ZWINT), transcript variant 2, mRNA.	1.69423	3.63e-18	5.97316e-14	5.62206	5.42218	4.81048	5.254	5.14163	4.85459	5.46274	5.04017	3.63916	5.12683	4.53142	3.59436	4.2976	3.27073	3.14324	4.10665	3.24702	4.09995	3.65027	3.81656	3.75616	3.19407	3.96749	4.22889	4.39369	3.18993	3.85526	3.72183	3.62961	4.13341	4.93164	3.991	4.13572	4.47513	3.90404	4.86924	3.60163	4.1259	3.17309	4.2662	4.67171	4.16948	4.15953	4.45857
NM_000417	IL2RA	Homo sapiens interleukin 2 receptor, alpha (IL2RA), mRNA.	1.69329	9.38e-10	1.54348e-05	6.74472	6.44467	6.46134	6.92448	8.3304	6.46713	6.28567	5.66937	5.43291	6.51161	5.86843	5.16978	5.1895	4.16489	5.22126	7.53422	7.11965	5.75136	5.00464	5.53611	6.23485	4.81997	5.74552	6.21444	5.38711	4.06785	4.66323	5.56199	5.84413	5.89825	5.03518	5.6929	4.74866	6.79101	5.42917	5.53411	5.6587	4.76996	3.75738	5.46016	6.01352	5.30883	5.90156	5.76513
NM_001793	CDH3	Homo sapiens cadherin 3, type 1, P-cadherin (placental) (CDH3), mRNA.	1.69327	1.66e-10	2.73153e-06	5.60274	5.30087	5.49763	5.40803	5.34398	5.39909	5.57521	5.6001	5.52764	5.62711	5.62772	4.63061	4.70884	4.60153	4.65769	4.5226	4.3663	4.82889	3.99236	4.0768	3.78674	3.84571	4.00243	3.95325	4.11747	4.4489	5.00476	4.47915	4.29913	4.12372	4.27442	4.55019	3.90491	4.18827	4.18654	4.34789	4.23308	4.6551	4.11964	4.3108	4.54209	4.32672	5.19779	4.52681
NM_000396	CTSK	Homo sapiens cathepsin K (CTSK), mRNA.	1.69304	2.48e-07	0.00408084	6.50617	7.52968	8.25738	6.47321	8.91344	8.07667	6.90873	5.3861	6.48348	7.53675	5.32948	6.23771	5.511	6.06189	7.38146	6.55579	7.88161	5.61289	5.72865	7.31097	5.99957	7.16245	7.64156	7.04102	5.86402	3.73176	5.96699	5.75242	5.6718	4.81724	7.45814	5.12967	6.50541	5.83605	4.87202	6.11539	6.15356	6.26634	4.92394	6.60032	6.88888	6.06953	3.97176	4.92815
NM_004515	ILF2	Homo sapiens interleukin enhancer binding factor 2, 45kDa (ILF2), mRNA.	1.69284	5.82e-11	9.57681e-07	8.91794	8.92942	9.2988	8.87846	9.28493	8.79539	9.03853	7.43007	8.75996	9.77082	7.90837	8.53052	8.75617	8.35045	8.86063	9.08525	9.0338	8.84409	8.60243	9.10983	8.77191	8.70171	9.0389	8.50125	8.16476	4.04141	8.141	7.11233	8.10134	8.19739	8.45229	7.63073	8.58276	8.58279	7.89283	8.54726	8.39283	8.48288	7.54286	8.33826	8.54765	7.7743	7.40749	7.64629
NM_014503	UTP20	Homo sapiens UTP20, small subunit (SSU) processome component, homolog (yeast) (UTP20), mRNA.	1.69269	1.59e-20	2.61635e-16	4.27481	4.80208	4.26556	4.32323	4.36575	4.58567	4.33148	4.05144	4.61461	4.5629	4.23868	2.85971	2.86603	2.65099	2.87555	2.92941	2.98511	2.93535	2.75045	2.78591	2.71788	2.66027	2.9413	2.7406	2.97272	2.52877	3.35963	3.3658	3.29608	3.07559	2.9304	3.15495	3.64203	3.55014	3.60358	3.65547	3.59543	3.60951	3.71394	3.50234	3.40572	3.01116	2.98434	2.75007
NM_002230	JUP	Homo sapiens junction plakoglobin (JUP), transcript variant 1, mRNA.	1.69214	9.71e-07	0.0159778	8.1683	7.90186	8.01508	8.40563	7.22673	7.62596	8.16645	7.33114	7.70032	8.71631	7.3513	6.9577	8.30584	7.2105	6.9832	7.62889	6.59609	8.44798	6.97257	6.91526	7.36606	6.72628	6.85906	6.39064	7.129	5.77326	7.21209	5.30837	6.54235	7.59288	6.65153	7.10959	7.71423	8.17638	7.57731	8.04845	8.02033	7.57474	6.26923	7.36236	7.71544	7.90853	7.35488	7.53161
NM_003901	SGPL1	Homo sapiens sphingosine-1-phosphate lyase 1 (SGPL1), mRNA.	1.69204	5.67e-20	9.32999e-16	7.53768	7.07084	7.87721	7.55415	7.53301	7.58656	7.9553	6.71639	7.34101	7.57727	6.9259	6.3164	6.75983	6.50682	6.65869	6.75755	6.42731	6.72415	6.08737	6.51147	6.61762	6.43989	6.53192	6.93867	7.01729	4.66357	6.8234	6.31745	7.20846	6.77563	6.35713	6.77456	7.49229	7.54644	6.8565	7.30417	7.18049	7.18415	6.49461	7.27551	7.16113	7.15897	6.3466	6.29003
NM_005914	MCM4	Homo sapiens minichromosome maintenance complex component 4 (MCM4), transcript variant 1, mRNA.	1.69186	4.14e-19	6.81237e-15	6.57363	6.55686	6.5824	6.4553	6.36069	6.494	6.39843	5.77744	6.26	6.52887	5.99094	5.04515	5.67757	5.35549	5.38963	5.47592	5.65713	5.73405	5.00518	5.61689	5.3776	5.07165	4.94871	5.63547	5.51307	4.79477	5.70018	4.75227	4.72362	5.30666	5.46223	4.89629	5.40184	5.82983	5.41599	5.85188	5.63048	5.84998	5.18389	6.10086	6.09902	5.78289	5.64434	5.71005
NM_031458	PARP9	Homo sapiens poly (ADP-ribose) polymerase family, member 9 (PARP9), mRNA.	1.69157	6.74e-10	1.10907e-05	8.09552	9.41904	9.12813	8.51551	9.24563	8.67541	9.04177	5.56069	8.22127	8.68783	6.99363	7.2728	7.93064	8.57168	7.77714	8.57165	8.6022	7.96996	6.98837	8.30961	8.30154	7.82814	8.82232	8.77322	8.0079	3.88671	8.24951	6.53393	8.26357	7.48998	8.30369	7.00237	7.56541	8.82462	8.16821	8.07867	7.88927	8.52483	7.46151	8.33354	8.58518	7.78336	6.84907	7.72366
NM_173567	ABHD7	Homo sapiens abhydrolase domain containing 7 (ABHD7), mRNA.	1.69141	9.69e-12	1.59449e-07	5.17358	4.83206	4.80342	5.17381	5.41365	5.06798	5.07717	5.52908	4.71073	5.33064	5.39248	4.07247	3.95455	4.2233	4.07042	3.65314	4.1517	3.92098	3.39708	3.6029	3.59653	3.55154	3.43805	3.86247	3.38567	3.68862	3.38377	3.35327	3.47762	3.52891	3.22413	3.33476	3.28543	3.37992	3.3168	3.38933	3.31933	3.48239	3.34409	2.82188	2.71929	2.77889	3.30021	2.96613
NM_003522	HIST1H2BF	Homo sapiens histone cluster 1, H2bf (HIST1H2BF), mRNA.	1.69109	4.23e-12	6.96046e-08	8.36339	9.50176	8.64156	8.62318	8.60078	7.9067	8.41039	7.73297	6.93851	8.29435	7.96069	7.24519	7.08632	6.02215	7.11926	7.99918	7.92236	7.35264	7.32397	7.13591	7.27464	6.56844	6.75266	7.3534	7.06629	6.96614	7.50896	6.67952	7.07977	7.69458	8.01672	7.34819	7.24308	8.27044	7.64281	8.23077	7.64783	7.59972	7.75546	7.8906	8.1657	7.69627	8.92131	8.741
NM_015194	MYO1D	Homo sapiens myosin ID (MYO1D), mRNA.	1.69035	3.24e-12	5.33142e-08	7.36727	7.49122	7.31045	7.86995	6.69874	7.5617	7.59694	5.71346	7.21248	7.47323	7.03566	6.16657	7.41368	5.96375	6.72347	6.91631	6.18821	7.47846	6.27088	5.90193	6.46195	6.22251	6.19384	6.1366	5.97851	3.89528	6.76367	5.71778	6.53336	6.32264	5.94872	5.71235	7.22168	7.09247	6.85528	7.40033	7.71795	7.11421	6.31198	6.7905	6.71291	7.34428	5.31882	6.05998
NM_001017995	SH3PXD2B	Homo sapiens SH3 and PX domains 2B (SH3PXD2B), mRNA.	1.69029	6.47e-13	1.06464e-08	5.9632	6.45452	6.11148	5.90548	7.22954	7.12805	5.49305	4.51873	5.486	5.99423	5.46418	4.82197	4.78894	4.45328	4.79124	5.54722	5.35346	5.10955	4.72774	5.14187	4.41215	4.74316	5.15233	4.4017	4.89366	3.69301	5.30593	4.6443	4.74488	3.8476	4.45512	4.37762	5.71825	5.18201	4.23441	4.87676	6.01329	5.215	5.59424	4.6352	4.52724	4.3521	4.50987	4.60011
NM_000063	C2	Homo sapiens complement component 2 (C2), mRNA.	1.68959	1.19e-12	1.95814e-08	5.92658	6.21146	6.58715	5.81651	6.85253	5.79599	5.97109	5.52193	5.55964	5.74157	5.63902	4.91604	5.74442	4.85285	4.86452	5.42238	5.88989	5.78171	4.75766	4.97321	5.08954	4.52349	5.01716	5.17472	4.91523	4.50834	5.55328	4.7674	4.59046	5.13253	5.21396	5.07716	4.95373	5.63209	4.59483	5.00556	5.14478	4.9839	4.24772	5.01761	5.11278	5.87196	5.8704	4.90732
NM_004741	NOLC1	Homo sapiens nucleolar and coiled-body phosphoprotein 1 (NOLC1), mRNA.	1.68944	7.16e-17	1.17818e-12	6.33101	6.49033	6.4817	6.43072	6.28245	6.63476	6.76368	5.03528	5.96164	6.85623	5.52236	4.88841	5.47558	5.13456	5.34395	4.95981	5.76164	5.53172	4.83081	5.38951	4.86128	5.03801	5.61625	4.84856	5.21028	3.28325	5.93786	5.25571	5.00679	5.08028	4.83416	4.75008	5.51374	5.55896	4.74389	5.96098	6.00072	5.78145	5.24793	5.3613	5.19352	4.70019	4.52428	4.47987
NM_004736	XPR1	Homo sapiens xenotropic and polytropic retrovirus receptor (XPR1), mRNA.	1.68911	2.19e-15	3.60364e-11	6.11485	7.22293	6.39931	6.46546	6.51004	6.46118	6.39904	4.95058	5.69883	6.12939	5.70662	5.47145	5.48967	4.88409	5.46355	5.54488	5.50105	5.79681	4.59146	4.78459	5.14445	5.22977	4.79145	5.48876	5.29161	4.31615	6.20467	5.25418	6.25573	4.7694	5.00805	4.60184	5.59438	5.90932	5.13812	5.8919	6.05833	5.72231	5.99559	5.59917	5.17897	5.46293	5.01347	4.51532
NM_024918	DSN1	Homo sapiens DSN1, MIND kinetochore complex component, homolog (S. cerevisiae) (DSN1), mRNA.	1.68756	2.63e-17	4.32766e-13	5.93308	6.26239	6.302	6.02119	5.73491	6.06426	5.99977	5.36453	5.7566	6.27479	5.7031	4.79668	4.71294	4.66699	4.91184	5.25999	4.41901	4.51166	4.53184	5.01646	4.79235	4.77206	4.61315	4.93141	4.89304	2.89879	4.8906	4.67933	4.5463	4.39214	4.56455	4.14121	4.87543	5.00569	4.82939	5.49438	4.96209	5.30609	4.60272	5.57598	5.31485	4.98764	4.89573	3.91584
NM_000546	TP53	Homo sapiens tumor protein p53 (Li-Fraumeni syndrome) (TP53), mRNA.	1.68715	4.82e-11	7.93131e-07	7.06821	7.4491	7.23747	7.27944	6.90164	7.1985	7.24845	6.38904	6.73659	7.15503	6.35384	6.15342	6.46937	5.67602	6.39304	5.54085	6.12521	6.72597	6.49517	5.98924	6.18054	6.22872	6.03993	5.75731	6.11508	5.10675	6.27991	5.6145	6.10568	6.20779	5.90284	6.11803	6.64152	6.90582	6.18058	6.85742	6.97977	6.65709	5.99723	6.524	6.42248	6.27715	6.44942	6.45228
NM_013372	GREM1	Homo sapiens gremlin 1, cysteine knot superfamily, homolog (Xenopus laevis) (GREM1), mRNA.	1.6864	5.78e-07	0.00951099	8.13621	9.34044	8.3088	7.70135	10.8079	9.35431	8.67147	6.15742	7.71125	9.43157	8.06655	6.57671	7.07476	6.84941	7.67855	7.80597	8.93495	7.31519	6.59101	7.92798	6.56212	7.38132	8.65759	8.2393	6.11499	4.1296	5.37472	7.96802	9.62337	6.63422	9.02276	6.17031	8.54795	6.86015	5.71804	7.74737	8.13885	7.17431	9.60311	7.62293	7.58097	7.30155	5.2784	6.0874
NM_004725	BUB3	Homo sapiens BUB3 budding uninhibited by benzimidazoles 3 homolog (yeast) (BUB3), transcript variant 1, mRNA.	1.68629	3.13e-14	5.15041e-10	7.6404	8.19945	8.19559	7.9239	8.1172	8.05307	7.92481	6.48773	7.7596	8.15715	7.1491	7.11139	7.01606	7.14269	7.28999	7.46026	7.55079	7.12895	7.20985	7.13653	7.23448	6.88717	7.30044	6.96978	6.89326	3.86085	7.13282	6.65245	7.24456	7.20908	6.91482	6.29353	7.21238	7.59884	6.93143	7.72345	7.61518	7.46675	6.63722	7.80338	7.77656	7.38506	6.87376	6.45782
NM_025138	C13orf23	Homo sapiens chromosome 13 open reading frame 23 (C13orf23), transcript variant 1, mRNA.	1.68623	3.71e-13	6.1048e-09	5.3028	5.64351	5.43669	5.16256	4.89689	5.13189	5.26011	4.22086	5.77848	5.86279	5.18585	4.2227	4.82752	4.1249	4.44926	4.90354	5.05278	4.8655	4.01964	3.65401	4.10583	4.08287	4.27234	4.00762	4.25608	2.76445	4.68494	3.56833	3.75557	4.80182	3.89975	4.49612	5.22244	5.20076	4.71315	5.04592	5.18519	5.03673	4.51788	4.68563	5.17268	4.44474	4.9268	3.86699
NM_020375	C12orf5	Homo sapiens chromosome 12 open reading frame 5 (C12orf5), mRNA.	1.6841	7.02e-12	1.15514e-07	4.8551	5.33544	5.35186	4.99294	6.21094	5.5591	5.72342	3.44505	4.85597	6.27815	3.7871	3.25603	3.01262	3.50125	3.51666	3.48163	4.0457	3.40522	2.93949	4.46369	3.85627	3.61613	4.53255	3.77275	3.9277	2.02955	3.82279	3.67631	3.93398	3.47086	3.75892	3.32773	4.0434	3.8039	2.9156	3.70151	3.50712	3.50712	3.22167	3.78904	3.43074	3.10809	2.16407	2.05494
NM_004728	DDX21	Homo sapiens DEAD (Asp-Glu-Ala-Asp) box polypeptide 21 (DDX21), mRNA.	1.68372	3.34e-16	5.49597e-12	7.05657	7.05561	7.29136	6.69905	7.09768	7.16127	7.13392	5.72948	6.52826	7.98753	6.08825	5.35216	5.64844	5.38779	5.7528	5.7171	6.82736	5.68144	5.58642	5.82985	5.64166	5.67895	6.59817	6.0422	6.44647	4.18308	7.04405	5.63873	5.45909	5.86873	5.43535	5.39331	6.5496	6.76193	5.69392	6.86031	6.92959	6.61439	6.04498	6.29064	6.37664	5.55436	5.28917	5.22314
NM_006638	RPP40	Homo sapiens ribonuclease P/MRP 40kDa subunit (RPP40), mRNA.	1.68359	4.08e-13	6.71364e-09	3.76419	4.0277	3.98856	3.55565	4.24482	3.93866	3.83375	3.72158	3.56116	4.90665	4.3148	2.67519	2.88222	2.59631	2.66426	3.23838	3.37184	3.04918	2.81303	3.22641	2.9153	2.78629	3.07416	3.16715	2.59293	3.01574	2.84067	2.45737	2.56268	2.61927	2.34253	3.54842	2.66678	3.24011	2.59034	2.78719	2.68263	2.44162	2.89013	3.35087	2.77936	2.4687	2.52926	2.0158
NM_153485	NUP155	Homo sapiens nucleoporin 155kDa (NUP155), transcript variant 1, mRNA.	1.68306	7.87e-13	1.29501e-08	5.70083	6.42697	6.16095	5.77117	6.09269	6.12296	5.95869	4.84524	5.90014	6.24027	5.80149	4.69038	4.49593	4.66298	4.90426	4.80228	5.38677	4.78358	4.03122	4.47018	4.54331	4.73824	4.45258	5.04253	5.02591	3.31362	5.2619	4.74181	4.99773	4.73773	4.40454	4.73535	5.41618	5.52218	5.03264	5.31356	5.29337	5.06215	5.37024	5.74351	5.5696	4.7751	4.64738	4.50314
NM_017782	C10orf18	Homo sapiens chromosome 10 open reading frame 18 (C10orf18), mRNA.	1.6823	4.91e-16	8.07941e-12	4.98379	5.25654	5.25624	5.07681	5.7686	5.76206	5.3825	3.84279	5.61533	6.08015	5.54462	3.6917	3.82147	4.01701	4.11233	3.53384	3.93028	3.81672	3.45807	3.95484	3.52639	3.64099	3.98547	3.37825	4.15053	2.87675	3.4848	3.59457	3.65635	3.5002	3.20883	3.59905	4.65663	4.8487	4.33796	4.52501	4.61496	4.52318	4.50305	5.06791	4.69117	4.41182	4.71943	3.68385
NM_002759	EIF2AK2	Homo sapiens eukaryotic translation initiation factor 2-alpha kinase 2 (EIF2AK2), mRNA.	1.68179	3.24e-11	5.33142e-07	5.25619	7.04169	6.39317	5.63219	6.0958	6.34757	6.2262	3.8711	5.67346	5.67414	4.96446	4.75383	4.494	5.49733	5.19122	4.62931	5.56307	4.79293	3.82328	4.55955	4.90807	5.34283	5.26271	5.64287	5.05914	2.54321	5.73084	4.94839	5.77455	5.48391	4.8137	4.67519	5.769	6.00337	5.88378	6.32017	6.58186	6.29553	6.00841	5.8662	5.68703	4.29251	3.7537	3.41099
NM_001553	IGFBP7	Homo sapiens insulin-like growth factor binding protein 7 (IGFBP7), mRNA.	1.68121	4.4e-12	7.2402e-08	8.48478	9.16609	8.57022	8.55949	10.3725	9.38166	8.76359	7.89892	8.11642	9.24433	7.91691	8.696	8.2556	7.95514	8.58239	8.49852	8.99312	8.07832	8.63252	8.31365	7.38824	8.16129	7.95673	8.5069	7.77523	6.38323	8.69564	8.602	8.44463	7.38512	9.35225	7.02286	8.33634	7.97952	7.91004	8.32702	8.45031	8.13471	8.87545	7.71926	8.27453	7.47083	6.639	6.78193
NM_006383	CIB2	Homo sapiens calcium and integrin binding family member 2 (CIB2), mRNA.	1.68112	1.35e-09	2.22143e-05	4.01049	4.65847	3.95224	4.34015	4.10004	4.12102	4.66763	3.21681	3.40975	4.09873	4.15327	2.89971	3.91954	2.84464	3.03369	3.36015	2.83791	4.03989	3.19544	3.40685	3.21345	3.33444	3.29354	3.25708	3.07709	2.80159	2.4162	2.39651	2.46735	2.08333	2.57723	2.93769	2.89426	2.74075	2.42394	3.22235	2.45976	2.34685	2.69079	1.9278	2.56462	3.60111	3.07196	2.1096
NM_006762	LAPTM5	Homo sapiens lysosomal associated multispanning membrane protein 5 (LAPTM5), mRNA.	1.68057	1.94e-08	0.000319227	9.38468	9.91209	10.1078	8.93448	10.2266	9.11319	9.66572	7.54993	7.69579	8.99279	8.35164	8.26204	9.15388	7.96679	8.90706	10.016	9.93962	9.25798	8.30026	9.06457	9.17868	8.46814	8.899	9.05322	8.29004	4.91172	8.13994	7.08674	8.20624	8.65688	8.1123	8.5277	8.68943	9.71819	7.72426	9.08765	10.0251	8.63752	8.04131	9.45519	9.38735	9.39107	8.35772	9.23131
NM_006644	HSPH1	Homo sapiens heat shock 105kDa/110kDa protein 1 (HSPH1), mRNA.	1.67893	4.02e-09	6.61491e-05	6.83385	7.18433	7.64874	6.94391	7.82508	7.93167	7.52419	5.79368	6.73942	8.18425	6.15788	4.85479	5.59887	5.8853	6.17357	5.50417	6.85666	5.97913	5.01702	6.66715	5.79479	6.23585	6.79179	6.05035	9.1072	3.55288	9.41218	6.35568	6.2126	5.69109	5.89874	5.17489	6.66573	6.54977	6.09781	7.18428	7.11134	6.72455	6.24958	6.45206	5.789	5.19358	5.08475	5.12487
NM_001017962	P4HA1	Homo sapiens procollagen-proline, 2-oxoglutarate 4-dioxygenase (proline 4-hydroxylase), alpha polypeptide I (P4HA1), transcript variant 2, mRNA.	1.6789	2.18e-09	3.58719e-05	6.67441	7.46616	7.60382	7.50925	7.10738	7.63962	7.65943	4.71945	6.93598	7.0492	5.7746	5.05593	3.90609	5.46798	5.97711	5.25374	5.37429	4.28495	5.41784	5.76557	5.99648	6.20473	6.20737	5.83725	6.13026	3.17125	6.59182	5.20698	6.86056	5.50364	4.76789	4.71805	6.08039	7.12923	5.88315	6.90907	6.80754	6.76996	5.43218	6.42019	5.65899	4.9796	4.82804	3.51619
NM_018072	HEATR1	Homo sapiens HEAT repeat containing 1 (HEATR1), mRNA.	1.6786	2.39e-16	3.93275e-12	5.89447	6.47136	6.21666	5.84492	6.3289	6.31708	5.88734	5.25113	6.07031	6.14149	6.02306	4.54038	4.84551	4.5658	4.8685	4.70479	5.39072	4.5519	4.48952	4.80409	4.64247	4.85609	4.75531	5.12892	5.35312	3.77182	5.62337	4.8983	5.07225	4.87897	4.57964	4.98235	5.24257	5.78911	5.45641	5.31635	5.50015	5.28768	5.69694	5.7448	5.31549	4.83096	4.41858	4.50985
NM_016426	GTSE1	Homo sapiens G-2 and S-phase expressed 1 (GTSE1), mRNA.	1.6781	9.01e-16	1.4826e-11	5.39972	5.25791	5.28551	5.3047	5.18218	5.1169	5.32739	5.2392	5.2115	5.72998	5.72618	4.10504	4.48093	4.36809	4.25271	4.59452	4.63337	4.55192	3.42933	3.62259	3.59603	3.40106	3.61011	3.83414	3.6101	3.56839	3.91108	3.66188	3.88375	3.82651	3.71206	3.90755	4.01791	4.25376	4.16253	4.19416	4.12684	4.07723	4.14638	4.2761	4.25594	4.1946	4.62806	4.30646
NM_182507	KRT80	Homo sapiens keratin 80 (KRT80), transcript variant 1, mRNA.	1.67693	1.42e-12	2.33661e-08	4.60889	4.07182	4.36898	4.19727	4.18037	4.19367	4.19024	4.59046	4.21099	4.68756	5.16614	3.22091	3.46736	3.29572	3.43489	3.17481	3.40798	3.58929	3.62803	3.58361	3.36765	3.11443	3.74784	3.47909	3.28919	3.30539	2.5236	2.36102	2.40853	2.49695	2.69668	2.83964	3.20847	3.34349	3.04489	3.00427	3.27177	3.23036	3.2933	2.953	3.02613	3.20096	3.23013	3.20324
NM_000950	PRRG1	Homo sapiens proline rich Gla (G-carboxyglutamic acid) 1 (PRRG1), mRNA.	1.67448	2.03e-11	3.34037e-07	4.32293	5.09155	4.62188	4.62844	5.55685	4.69827	4.5305	2.97943	4.12971	5.07888	4.12728	5.14371	4.8883	4.26704	4.65925	5.09755	4.97688	5.06005	5.00293	3.71849	4.38485	3.74053	4.29878	4.06456	4.22735	2.65287	4.14472	4.26255	4.02189	4.821	3.98631	3.87173	4.35827	4.50552	4.13663	4.48298	5.01859	4.68866	4.2615	3.68564	3.57168	3.5328	4.18908	3.66075
NM_002449	MSX2	Homo sapiens msh homeobox 2 (MSX2), mRNA.	1.67314	8.41e-14	1.38387e-09	4.02665	4.55247	4.15443	4.09592	3.81771	4.12245	4.1537	4.41653	3.59718	4.23255	4.4903	2.58908	3.01271	2.74077	2.38958	2.79147	2.7987	3.20327	2.65304	2.69206	3.05579	2.36382	2.71243	2.48324	2.08826	2.39147	2.63875	2.34002	2.29597	2.3466	2.12921	2.03782	2.95267	3.04625	2.85686	3.20731	2.8582	3.22694	2.67379	3.18558	3.15828	2.78696	3.2932	3.30697
NM_203401	STMN1	Homo sapiens stathmin 1/oncoprotein 18 (STMN1), transcript variant 1, mRNA.	1.67261	1.14e-15	1.87587e-11	6.79702	6.9006	6.77643	6.50343	7.50814	6.2366	6.62194	6.56449	6.06547	6.50731	5.99184	5.34523	6.53682	5.53445	5.45878	6.08288	6.82888	6.59713	5.10522	5.58754	5.96594	5.74864	5.58923	7.12613	5.69381	4.55709	5.77455	6.05688	5.47719	6.20242	6.18482	5.94066	6.2725	6.76454	6.14367	5.99216	5.76872	5.86724	5.6739	6.92092	6.73748	5.79587	5.82035	5.57998
NM_018092	NETO2	Homo sapiens neuropilin (NRP) and tolloid (TLL)-like 2 (NETO2), mRNA.	1.67149	1.42e-09	2.33661e-05	5.10055	4.64422	4.93146	4.76676	5.03944	4.8584	4.78056	5.21224	5.38546	5.26803	4.93554	3.15892	3.07856	3.06993	3.39307	3.4035	3.71899	3.26096	3.84874	3.5612	3.91686	3.93538	4.03956	4.49442	4.23792	3.30176	3.3004	3.5116	3.49409	3.73831	3.30416	3.57167	4.0908	4.16197	3.98158	3.93058	3.78066	4.18031	3.10772	3.52433	3.44436	3.52624	4.1013	3.22922
NM_005342	HMGB3	Homo sapiens high-mobility group box 3 (HMGB3), mRNA.	1.67031	2.21e-13	3.63656e-09	5.68801	5.58816	5.75213	5.88374	5.52688	5.56328	5.88046	6.01301	5.723	6.32478	6.9648	4.36672	5.11719	4.9817	5.10012	4.88099	5.05649	5.21004	5.17058	4.87155	4.57038	4.94513	5.03416	4.92348	4.70177	5.1969	4.03104	4.27796	4.36667	4.20573	4.32947	5.2623	5.09207	4.79113	4.82083	4.55915	4.84028	4.65151	4.54154	4.84827	4.67088	4.96397	4.87369	4.54064
NM_003511	HIST1H2AL	Homo sapiens histone cluster 1, H2al (HIST1H2AL), mRNA.	1.67018	4.44e-11	7.30602e-07	8.48016	9.1486	8.71753	8.25966	7.95675	6.96845	8.84108	8.13784	7.54653	7.96376	8.44685	6.84841	7.23438	7.34	6.52005	7.77058	8.32515	7.50693	7.32222	7.72931	7.97403	5.66388	7.63842	7.17766	7.14628	5.9013	7.13288	5.77795	5.84218	7.28944	8.53453	6.87871	7.5134	8.86844	7.73208	7.90822	7.55272	7.56345	7.92459	7.90982	9.09413	8.9782	7.4562	7.55757
NM_175065	HIST2H2AB	Homo sapiens histone cluster 2, H2ab (HIST2H2AB), mRNA.	1.66979	2.73e-10	4.49222e-06	9.39882	9.6255	9.69091	9.15912	9.55797	8.84669	10.0084	7.32293	8.39377	8.88112	8.13949	7.60898	8.05356	8.05544	8.37115	8.93283	8.55837	8.59827	8.59672	9.17168	8.44346	8.25987	8.44605	9.41277	8.44438	4.77727	7.78138	6.92622	7.57239	8.59224	10.026	8.0575	8.67007	8.94251	8.25668	8.69157	8.36655	8.62139	8.13728	9.11579	9.32711	9.63692	8.70748	8.1686
NM_178009	DGKH	Homo sapiens diacylglycerol kinase, eta (DGKH), transcript variant 2, mRNA.	1.6685	2.49e-14	4.09729e-10	4.68384	5.77929	4.95597	5.01738	5.61348	6.1972	5.38582	4.20966	4.98065	5.02865	4.71684	3.20492	3.50715	3.33723	3.10125	3.49974	4.17203	3.45598	3.25211	3.7095	2.97796	3.52237	3.23766	4.03	4.45159	3.05849	4.56497	4.63709	4.60014	3.31153	3.98741	3.66169	4.4504	3.64539	3.69216	3.86136	4.01039	3.86502	4.94466	3.54675	3.51055	3.32936	3.21769	3.04337
NM_014056	HIGD1A	Homo sapiens HIG1 domain family, member 1A (HIGD1A), mRNA.	1.6672	1.17e-08	0.000192524	4.73721	6.16007	5.69787	4.8733	7.67623	5.17551	6.27323	4.55783	4.53666	6.25846	4.17896	3.60039	3.77939	3.49874	3.91447	4.5964	6.35721	4.37968	3.37666	4.86012	4.70915	4.47589	4.31252	5.45659	4.52124	2.30677	4.56695	4.52042	4.94285	4.69947	4.25436	3.82224	4.84022	4.7179	3.47091	4.63019	4.81395	4.17188	3.72677	6.12894	5.47734	4.23431	4.02894	4.21177
NM_020650	RCN3	Homo sapiens reticulocalbin 3, EF-hand calcium binding domain (RCN3), mRNA.	1.66671	1.78e-11	2.92899e-07	5.53382	6.01464	6.05873	5.9344	6.32487	6.30848	5.88164	5.36626	5.83237	6.17626	5.98323	5.31215	5.23705	5.4599	5.44375	5.02802	5.18064	5.15335	5.20662	5.29158	4.69273	5.32934	4.79147	4.99416	5.34852	5.02769	4.98844	4.90013	4.86712	4.19307	4.67077	4.66358	5.16082	4.97775	4.90299	5.25877	5.39766	5.31747	4.85132	4.96868	4.77232	5.13401	4.90934	4.77392
NM_006169	NNMT	Homo sapiens nicotinamide N-methyltransferase (NNMT), mRNA.	1.66649	3.98e-08	0.000654909	7.05523	6.92692	7.4784	6.62864	8.67099	7.97706	6.50199	5.97784	6.42049	7.59811	6.04443	6.7036	5.73963	5.31662	6.56786	6.29111	7.75741	5.95984	6.74812	6.66506	6.10856	6.37519	7.61512	6.42566	6.53464	4.49761	7.32393	7.07509	5.9101	5.89012	6.7004	6.00883	7.48785	5.93537	4.65298	6.63558	6.78564	6.39302	6.21509	5.19172	6.16459	4.68012	5.56849	5.23327
NM_006868	RAB31	Homo sapiens RAB31, member RAS oncogene family (RAB31), mRNA.	1.66594	2.31e-08	0.000380111	7.61078	8.92535	8.08904	7.95863	9.55368	9.49192	8.29274	6.59035	6.16766	8.16634	5.82944	6.69975	7.43372	6.62309	7.28175	7.46847	8.50842	7.50803	6.32352	7.24628	6.33302	7.00616	6.96525	7.58433	6.9614	4.36154	6.52566	7.41041	8.02754	6.37148	7.76001	6.41872	8.3589	6.60837	5.42874	7.56096	8.20915	7.18113	8.07262	6.24709	6.88162	5.66458	5.43217	5.4821
NM_173674	DCBLD1	Homo sapiens discoidin, CUB and LCCL domain containing 1 (DCBLD1), mRNA.	1.66564	3.45e-15	5.67697e-11	5.82572	6.37578	6.68275	6.33105	6.43393	5.59811	6.16415	5.10255	6.14023	6.44743	5.43259	4.80386	4.45553	4.84265	4.80612	5.0234	4.64305	4.27062	4.934	5.27902	5.70445	5.57596	5.626	5.93667	5.61225	3.46354	5.32064	4.02956	5.64418	5.09256	4.74522	4.41999	5.25249	6.02834	5.42029	5.69911	5.40808	5.54553	5.14176	5.70252	5.42207	4.62802	4.32475	4.17176
NM_003326	TNFSF4	Homo sapiens tumor necrosis factor (ligand) superfamily, member 4 (tax-transcriptionally activated glycoprotein 1, 34kDa) (TNFSF4), mRNA.	1.66539	5.06e-10	8.32623e-06	4.36672	4.64725	4.67631	4.74612	4.96397	4.65164	4.14783	4.03502	4.19284	3.81347	4.24121	2.31692	2.46393	2.52767	3.6116	3.08855	3.65547	2.68883	2.85452	2.83238	2.86286	3.09624	2.71482	3.84608	3.24862	3.2488	2.97103	2.92006	3.26953	2.83606	2.91598	2.95707	2.80582	2.84367	2.87019	2.66701	2.80735	3.0741	3.0083	3.0802	2.1942	2.94203	2.38581	2.7571
NM_005940	MMP11	Homo sapiens matrix metallopeptidase 11 (stromelysin 3) (MMP11), mRNA.	1.66513	8.54e-11	1.40526e-06	6.06945	6.0774	6.2736	6.4267	6.1132	5.87435	6.04676	6.2021	5.87445	6.41012	6.55703	4.72769	5.19805	5.0894	5.16306	4.90586	4.78738	5.25991	5.34628	5.11733	5.17943	4.83411	4.96354	4.83723	5.11536	5.28938	4.86436	4.78234	4.79212	4.99501	5.20512	5.00533	5.02523	5.26115	4.93849	5.05518	5.24646	4.9947	4.95641	4.75673	5.11172	5.02285	5.25226	5.12938
NM_002583	PAWR	Homo sapiens PRKC, apoptosis, WT1, regulator (PAWR), mRNA.	1.66496	5e-18	8.2275e-14	4.35675	4.93188	4.92532	4.91008	5.52361	4.79533	4.7412	4.43703	5.0565	6.40481	5.31557	3.65017	4.03465	3.87317	4.22409	3.39926	4.1099	4.0415	3.64329	3.80074	3.79822	3.79932	3.8202	3.92515	3.78174	3.56598	4.56248	4.44729	4.29912	4.42542	3.9375	3.95918	4.71856	4.43104	4.51535	4.68025	4.63696	4.49028	4.54188	4.48241	4.71995	3.97286	3.85615	3.90391
NM_003659	AGPS	Homo sapiens alkylglycerone phosphate synthase (AGPS), mRNA.	1.66435	1.33e-13	2.18851e-09	6.32806	7.92214	7.13043	7.43745	7.31644	7.31954	7.51059	4.87904	6.02432	6.81265	5.51501	5.81379	5.74828	5.62594	6.06679	5.85582	6.3986	5.91118	5.10048	5.68144	5.67141	6.30961	5.61647	6.83492	6.10857	3.84312	6.62301	5.50167	6.71596	5.67538	5.91791	5.13017	5.62402	6.68186	5.95555	6.81942	6.61019	6.27853	6.2303	6.07691	6.14668	5.51287	4.96171	4.73466
NM_022059	CXCL16	Homo sapiens chemokine (C-X-C motif) ligand 16 (CXCL16), mRNA.	1.66423	1.87e-10	3.07708e-06	7.27705	7.27804	7.46244	7.23328	7.473	6.61908	7.08151	5.38987	6.35432	7.7181	5.74022	6.2791	7.4169	5.52889	6.19502	7.36459	6.6981	7.55847	6.22826	6.20765	6.48371	5.84384	6.89172	6.21886	5.99478	3.33281	6.10528	5.373	6.04525	6.31215	6.31175	6.00953	5.78746	6.34714	5.05185	6.86918	6.82673	6.30299	4.32678	6.3576	7.17946	6.44971	6.76218	6.25191
NM_017816	LYAR	Homo sapiens Ly1 antibody reactive homolog (mouse) (LYAR), mRNA.	1.66334	1.13e-14	1.85941e-10	5.06188	6.35816	5.01689	4.93673	6.13447	5.43982	5.87024	4.22236	5.32827	5.98552	5.06191	4.22291	4.27579	3.86637	3.94665	4.74278	5.76288	4.6149	4.64047	4.53582	4.5103	4.15864	4.89136	5.01105	4.49068	3.20839	4.40223	4.35907	4.564	4.61725	4.40103	3.9531	5.18917	5.09836	4.75274	5.35051	4.89059	5.23975	4.76598	4.8178	5.0458	4.35251	3.30957	4.1211
NM_206953	PRAME	Homo sapiens preferentially expressed antigen in melanoma (PRAME), transcript variant 2, mRNA.	1.6627	4.86e-08	0.000799713	4.23357	3.9803	4.36496	4.42492	4.39349	4.2138	4.35515	4.77247	4.45123	4.46279	4.7252	2.88619	2.86593	3.15103	2.94475	2.96911	2.94239	2.95222	2.84816	3.03351	2.84294	3.02546	3.02086	3.08105	3.08811	3.33959	2.17724	2.50136	2.35869	2.26925	2.56177	3.07462	2.56584	2.91258	2.46505	2.54778	2.7612	3.06361	2.42529	2.6437	2.76088	2.95541	5.66348	3.02637
NM_004247	EFTUD2	Homo sapiens elongation factor Tu GTP binding domain containing 2 (EFTUD2), mRNA.	1.66227	5.23e-19	8.60596e-15	6.89074	7.12756	7.10665	6.83306	6.92562	7.3464	7.10472	5.627	6.80632	6.71227	6.14418	5.79634	5.70573	5.75637	5.9806	5.89357	5.43992	5.85557	5.83228	5.6623	5.94574	5.87747	5.71771	5.61731	5.9604	4.03123	6.09948	5.41388	5.81176	5.3296	5.21288	5.0537	5.98148	6.66864	6.1426	6.66436	6.736	6.53075	5.90699	5.99106	6.1634	5.8614	5.56733	5.02304
NM_018451	CENPJ	Homo sapiens centromere protein J (CENPJ), mRNA.	1.66183	1.91e-18	3.1429e-14	4.00523	4.93865	4.37157	4.27902	4.4641	4.71625	4.67293	3.6632	4.18476	3.76416	4.29197	3.05007	3.09404	2.57096	3.05292	2.99635	3.76922	3.26323	2.85706	3.03135	2.75701	2.88628	2.87682	3.50583	3.00456	2.60134	2.78093	2.9594	2.89471	3.00711	2.75237	3.00827	3.30084	3.40636	3.33845	3.62218	3.37705	3.48652	3.70735	2.8908	3.13359	3.05256	3.16852	2.60484
NM_000251	MSH2	Homo sapiens mutS homolog 2, colon cancer, nonpolyposis type 1 (E. coli) (MSH2), mRNA.	1.66133	1.06e-14	1.74423e-10	4.61614	5.20989	5.13672	4.78528	5.00962	5.09595	4.75716	4.29951	4.59027	5.28671	4.81781	2.9212	2.77963	2.78146	3.27947	2.99093	3.79759	2.86609	3.18935	3.68045	3.64938	3.90919	3.22114	4.22761	3.78673	3.091	3.89365	3.99754	4.01043	3.75029	3.4037	3.54284	3.73799	4.30974	3.97067	4.18122	4.15837	4.0793	4.03557	5.02724	4.213	3.54602	3.11355	3.23037
NM_015942	MTERFD1	Homo sapiens MTERF domain containing 1 (MTERFD1), mRNA.	1.66121	4.8e-15	7.8984e-11	3.90974	4.42762	4.19594	4.0657	5.07415	4.20588	4.3761	3.83158	4.44934	5.15831	4.30982	2.46077	2.35469	2.46116	2.76961	2.34965	3.45784	2.1424	2.40008	2.6998	2.61385	2.9281	3.33255	2.76887	2.76285	1.98032	2.46071	2.77327	2.59295	2.86703	2.26262	2.66578	3.09068	2.93843	2.72165	2.80834	2.68429	2.88073	2.86259	3.73018	3.2034	2.32894	2.39918	2.00886
NM_002425	MMP10	Homo sapiens matrix metallopeptidase 10 (stromelysin 2) (MMP10), mRNA.	1.66019	2.21e-10	3.63655e-06	3.25043	2.52904	2.63099	2.96707	2.73021	2.92693	3.10034	2.74395	3.15321	3.32652	3.43396	2.15442	1.90396	2.23782	1.91011	2.14355	1.74516	2.07505	1.77698	1.73436	1.46399	1.61174	1.95555	1.62658	1.87965	1.79147	3.04086	2.01825	2.18172	2.13822	1.84262	2.17822	1.70471	2.23004	1.42102	1.86741	2.02671	1.75457	1.736	2.32994	2.39702	2.12632	2.40337	2.0853
NM_001042422	SLC16A3	Homo sapiens solute carrier family 16, member 3 (monocarboxylic acid transporter 4) (SLC16A3), transcript variant 1, mRNA.	1.66015	1.93e-14	3.17582e-10	6.86467	6.42868	7.17418	6.8758	6.89028	6.77006	7.08818	6.76911	5.80366	6.8522	6.60702	5.2989	6.40643	5.44243	5.18998	5.53486	5.59567	6.44269	5.17552	5.72084	5.44747	5.32275	6.29144	5.62753	5.88187	5.65417	5.59305	5.1922	5.30033	5.06258	5.64412	5.7106	6.15242	6.3035	5.67115	6.07644	6.39647	5.76562	5.42846	5.65073	5.9569	5.96402	5.74667	5.60438
NM_006033	LIPG	Homo sapiens lipase, endothelial (LIPG), mRNA.	1.6593	1.55e-14	2.55052e-10	5.32432	5.17628	5.16561	5.07918	5.40752	5.25127	5.54547	5.32575	5.17464	5.62607	5.55934	4.15091	4.74595	4.3386	4.41055	4.23812	4.52941	4.6655	3.6522	4.1499	3.9586	3.86388	4.80377	4.31715	4.05817	4.10336	3.47852	3.73381	3.75678	3.73279	3.63612	3.61063	3.97582	3.86916	3.69096	4.1371	4.15888	4.19987	4.36176	4.10727	4.21556	4.30516	4.95635	4.02855
NM_000837	GRINA	Homo sapiens glutamate receptor, ionotropic, N-methyl D-asparate-associated protein 1 (glutamate binding) (GRINA), transcript variant 1, mRNA.	1.65865	3.31e-10	5.44661e-06	8.07227	8.48883	8.40667	8.05624	9.17464	8.16926	8.1767	6.76633	7.97642	8.60003	7.4912	8.37706	8.40715	7.73051	7.93343	7.94218	8.27419	8.56108	8.13767	7.92626	7.11543	7.49725	7.45219	7.18374	7.77303	6.217	8.00568	6.66142	7.20136	7.03803	7.54182	6.85224	7.84325	8.15884	7.2579	7.67313	8.2495	8.19148	7.51484	7.65188	8.00818	7.67056	8.67099	7.33073
NM_004502	HOXB7	Homo sapiens homeobox B7 (HOXB7), mRNA.	1.65827	2.04e-13	3.35682e-09	4.72131	4.46785	4.90084	4.71462	4.66749	4.90291	4.6464	5.0561	4.8561	4.63985	5.00531	4.26619	4.20949	3.72053	3.98218	4.15469	4.14886	4.17124	4.03411	4.03932	3.75767	3.61887	3.91518	3.69382	3.81173	3.89907	3.51524	3.69551	3.42747	3.30687	3.65371	3.87282	3.5018	3.2656	3.30136	3.57321	3.73922	3.54318	3.53378	3.52826	3.66865	3.54437	4.26204	3.70766
NM_015440	MTHFD1L	Homo sapiens methylenetetrahydrofolate dehydrogenase (NADP+ dependent) 1-like (MTHFD1L), mRNA.	1.65739	8.04e-18	1.32298e-13	5.68653	5.65252	5.84154	5.67741	5.53332	5.54602	5.67539	5.34477	5.69045	5.95656	5.87521	4.28348	4.35393	4.21981	4.48134	4.3285	4.61662	4.4252	4.22128	4.15855	4.00017	4.02909	4.13706	4.2741	4.4292	4.15858	4.9456	4.17375	4.29861	4.21701	4.42024	4.2736	4.62983	4.832	4.57517	4.56537	4.73984	4.72269	4.73132	4.18175	4.26525	4.14255	4.40367	4.26525
NM_198976	TH1L	Homo sapiens TH1-like (Drosophila) (TH1L), transcript variant 1, mRNA.	1.65713	8.3e-16	1.36577e-11	6.98122	7.40575	7.40193	7.06169	6.86333	7.25774	7.32712	6.05486	7.18354	7.49849	6.6274	6.12766	6.32531	6.37517	6.54667	6.25813	6.46205	6.51817	5.90131	6.24155	6.20085	6.20576	6.12884	5.94902	6.36589	4.20579	6.18584	4.97075	6.26999	5.71146	5.83802	5.34093	6.6686	7.13982	6.41697	6.86234	6.90468	6.8383	6.22753	6.53482	6.4812	6.31207	6.13925	5.72317
NM_017554	PARP14	Homo sapiens poly (ADP-ribose) polymerase family, member 14 (PARP14), mRNA.	1.65651	9.48e-12	1.55993e-07	5.99955	7.25011	7.23488	6.58203	7.37001	6.9822	7.19666	5.24998	6.29187	7.10321	5.95521	4.39558	5.56365	5.78453	5.45381	5.53434	6.13293	5.76202	4.55196	5.17162	5.4435	5.27545	5.72022	6.37101	6.46194	3.50395	6.23577	5.64206	5.7309	5.9582	5.67846	5.57741	5.892	6.26357	6.21601	5.88892	5.99231	6.07027	6.27545	6.72618	6.57618	5.77764	5.26069	5.28996
NM_006200	PCSK5	Homo sapiens proprotein convertase subtilisin/kexin type 5 (PCSK5), mRNA.	1.65606	1.9e-11	3.12645e-07	5.49836	6.13009	5.42583	6.17084	6.76179	6.23247	5.92895	5.25331	5.36494	5.7423	5.9235	5.09562	6.54277	4.39728	4.90648	5.32641	5.29133	6.71479	5.12882	4.44361	4.10093	4.55945	4.65187	5.3773	6.27001	4.78176	6.14829	4.58334	4.86662	3.78007	4.80549	4.11247	4.56673	3.9299	4.48951	4.53341	4.90579	4.72091	5.92372	4.02842	4.30007	6.11078	3.95528	3.88402
NM_145647	WDR67	Homo sapiens WD repeat domain 67 (WDR67), mRNA.	1.65508	1.82e-15	2.99481e-11	4.39382	5.16089	4.89903	4.25926	4.77209	4.61975	4.64159	4.11808	4.50425	4.77639	4.41981	3.26026	3.32223	3.34897	3.44612	3.52251	3.59741	3.29978	3.19379	3.32497	3.54949	3.32844	2.91147	3.69489	3.28342	2.43821	3.5994	3.47629	3.58676	3.64489	3.28529	3.49272	3.56125	3.7493	3.53774	3.61245	3.27499	3.53627	3.13232	4.36466	3.91381	3.08533	3.04739	2.92212
NM_024546	C13orf7	Homo sapiens chromosome 13 open reading frame 7 (C13orf7), mRNA.	1.65464	1.11e-13	1.8265e-09	5.15009	6.79168	6.1887	6.18148	5.75864	6.23552	6.3757	5.05868	5.62838	6.09999	4.9987	4.17044	4.07491	4.09131	4.62609	4.84505	5.04024	4.36359	3.54512	3.9833	4.38952	3.99991	4.52849	4.59412	4.64796	2.77459	5.02152	4.65284	4.99319	4.70857	4.33454	4.46284	5.26479	5.17841	4.72785	5.33402	5.31427	5.33275	4.71747	5.43492	4.66776	4.5133	4.19163	4.17039
NM_002009	FGF7	Homo sapiens fibroblast growth factor 7 (keratinocyte growth factor) (FGF7), mRNA.	1.65395	7.57e-07	0.0124564	3.20514	5.17946	3.74741	3.61409	6.19983	4.01128	4.03527	2.86061	3.04968	5.18301	3.51724	3.41508	3.33244	2.93356	3.34211	3.62268	4.46308	3.47206	3.23867	3.29564	2.75144	3.11943	4.35791	2.94668	2.16767	1.3787	2.38088	3.99751	3.43301	2.9295	3.84488	2.58555	2.92751	1.91575	1.98449	2.53322	2.88601	2.64461	4.24925	2.67713	3.02838	2.35014	1.53151	2.70157
NM_001809	CENPA	Homo sapiens centromere protein A (CENPA), transcript variant 1, mRNA.	1.65377	2.06e-12	3.38973e-08	6.18813	6.03384	6.2347	6.19002	6.15787	5.95965	6.15598	6.42066	6.30378	6.54937	6.88091	5.28576	5.90364	5.68721	5.409	5.30991	5.55933	5.37102	4.50002	4.93047	4.50393	4.37001	4.70437	4.56115	4.53838	4.7786	5.32173	5.32161	5.06898	5.18804	5.25341	5.49365	5.18303	5.72869	5.35686	5.15801	5.36037	5.34011	5.3655	5.40245	5.17908	5.67257	5.3381	5.48673
NM_012286	MORF4L2	Homo sapiens mortality factor 4 like 2 (MORF4L2), mRNA.	1.6529	1.74e-10	2.86317e-06	8.39852	8.74644	8.5495	8.80614	8.86678	8.68496	8.82607	6.71816	8.21963	9.47554	7.23359	7.24818	7.583	7.66502	8.20125	8.24006	8.11364	7.78528	7.09989	7.82799	7.83061	7.96282	8.41405	7.85703	7.53902	3.4672	7.79325	6.57253	7.76548	6.84122	7.61975	6.88216	7.99173	7.9596	7.11083	8.5264	8.60705	8.16273	7.18748	7.93728	8.27767	6.76484	5.71734	6.31545
NM_006216	SERPINE2	Homo sapiens serpin peptidase inhibitor, clade E (nexin, plasminogen activator inhibitor type 1), member 2 (SERPINE2), mRNA.	1.65274	3.53e-10	5.80861e-06	5.43069	6.48898	5.90978	5.45249	7.96254	5.93835	5.82573	4.98743	4.79344	6.02028	4.78125	3.72966	4.53475	4.00941	4.14092	4.38342	6.13582	4.49484	3.7209	4.10098	3.988	4.19179	5.36441	5.19279	3.97877	3.38345	3.78798	5.02808	4.61548	4.15352	4.2036	4.1883	4.87219	4.33721	4.00188	4.39458	4.78761	4.55982	5.40229	4.50168	4.72452	4.4805	5.30455	4.0309
NM_021095	SLC5A6	Homo sapiens solute carrier family 5 (sodium-dependent vitamin transporter), member 6 (SLC5A6), mRNA.	1.65129	4.16e-13	6.84528e-09	6.35715	6.48417	6.51809	6.412	6.24993	6.25162	6.34121	5.75736	6.05806	6.43676	6.0911	5.54197	5.9235	5.48527	5.45369	5.52728	5.81757	6.11263	5.26654	5.25853	5.10125	4.89927	4.97599	4.91345	5.68959	4.26736	6.29551	4.22128	5.39364	4.67726	4.90555	4.71815	5.20186	6.19639	5.35797	5.93987	5.86958	5.89028	5.31905	5.26843	5.23248	5.43241	5.84487	5.10912
NM_033429	CALML4	Homo sapiens calmodulin-like 4 (CALML4), transcript variant 1, mRNA.	1.6509	2.12e-08	0.000348846	6.43857	6.78707	6.68292	6.91325	6.60721	6.20412	6.9076	5.62797	6.15031	7.41383	5.84066	5.0085	7.9318	5.40467	5.99817	7.31946	6.81096	8.01332	5.57654	6.49645	5.21283	5.6857	5.8166	6.38618	5.96541	4.91464	6.50632	5.64371	6.23215	6.33647	7.38036	5.78105	6.19462	6.26556	5.90075	6.44843	6.44735	6.10075	6.41972	6.3781	7.0282	7.11279	5.80363	5.49098
NM_001854	COL11A1	Homo sapiens collagen, type XI, alpha 1 (COL11A1), transcript variant A, mRNA.	1.65061	2.15e-11	3.53782e-07	4.42013	4.09444	4.2402	4.25994	4.13217	4.07223	4.32506	4.59889	4.32344	4.60962	4.87976	3.26397	3.09509	3.27702	3.25271	3.27548	3.14716	3.26397	3.0046	3.21232	3.11823	3.1083	3.23236	3.23847	3.22044	3.50487	2.6884	2.66215	2.63659	2.54899	2.99146	3.25132	2.57506	2.8131	2.8085	2.72317	2.81236	2.9476	2.66293	2.81748	2.64362	3.13863	3.24424	3.13863
NM_001002264	EPSTI1	Homo sapiens epithelial stromal interaction 1 (breast) (EPSTI1), transcript variant 1, mRNA.	1.65013	1.04e-11	1.71132e-07	4.976	5.85214	6.25217	5.60599	6.86293	5.76428	5.85659	4.36153	4.98187	6.83702	4.79083	4.05127	4.97076	5.75066	4.63303	5.01224	6.22708	5.19819	4.09739	4.97319	4.96143	4.67491	5.69832	6.08179	4.97374	3.97994	3.83612	3.94879	4.25335	4.76482	4.61885	3.93995	5.04471	5.15325	5.26635	5.47025	5.01586	5.29338	4.9599	4.8867	5.61645	5.19088	3.56229	4.09473
NM_003821	RIPK2	Homo sapiens receptor-interacting serine-threonine kinase 2 (RIPK2), mRNA.	1.64959	1.2e-11	1.9746e-07	5.46181	6.33601	6.15578	5.98124	6.82329	6.11386	5.96114	4.41791	5.51201	6.42558	4.88204	4.31988	4.2395	4.15625	4.7779	4.53779	6.0715	4.05622	4.00886	4.61459	4.50799	4.65301	4.9088	4.90612	5.00924	3.0904	5.25647	4.32662	4.89801	4.87292	4.47922	4.29276	4.94763	6.00432	4.87054	5.46009	5.38685	5.39333	4.84697	5.74028	5.48418	4.62566	4.42994	4.27729
NM_003610	RAE1	Homo sapiens RAE1 RNA export 1 homolog (S. pombe) (RAE1), transcript variant 1, mRNA.	1.64937	1.76e-15	2.89608e-11	6.18359	6.61569	6.56909	6.3189	6.64339	6.65412	6.43836	5.05179	5.80022	6.72834	5.72174	5.01683	5.36532	5.56047	5.72435	5.31973	5.48611	5.5345	5.41959	5.89182	5.29246	5.76297	5.52413	5.16356	5.39489	3.64379	5.20642	4.51516	5.41679	4.65572	4.86247	4.11393	5.8626	5.55699	4.9528	5.78149	5.76338	5.85699	4.81952	5.68901	6.28547	5.27869	5.11255	4.77742
NM_019042	PUS7	Homo sapiens pseudouridylate synthase 7 homolog (S. cerevisiae) (PUS7), mRNA.	1.64875	1.17e-15	1.92524e-11	4.86978	5.49016	5.03368	4.82611	4.89838	4.97475	4.89838	4.06854	4.65464	5.56417	4.5448	3.18838	3.19495	3.03311	3.5197	3.11817	3.80614	3.32327	2.99996	3.71043	3.62706	4.28044	3.63049	3.82411	3.64759	2.7549	4.16505	3.15483	3.40798	3.21552	3.09774	3.15762	3.72531	4.417	3.69544	4.15724	4.13731	3.96411	4.03339	3.77751	3.86734	3.10741	2.96059	2.81673
NM_024624	SMC6	Homo sapiens structural maintenance of chromosomes 6 (SMC6), mRNA.	1.64774	5.49e-12	9.0338e-08	3.91628	5.93864	5.13051	5.08391	4.91937	4.98334	5.05498	3.60649	4.62572	4.84537	4.54721	3.32241	3.2737	3.13354	3.57127	3.72908	4.2038	3.4593	2.94284	3.19972	3.77029	3.81803	3.09794	3.58803	3.76147	2.37613	4.07548	3.75437	3.3831	3.94703	3.01652	3.48945	3.69999	4.51825	4.28687	4.37842	4.39947	4.32676	3.98415	5.20921	4.78766	3.2987	2.84082	3.07422
NM_020729	ODF2L	Homo sapiens outer dense fiber of sperm tails 2-like (ODF2L), transcript variant 1, mRNA.	1.6467	5.14e-13	8.45787e-09	4.18501	5.21613	4.32057	4.2389	4.34279	4.44809	4.22533	3.69217	4.15029	4.17606	4.58138	3.13926	3.10582	2.90148	3.06758	3.23773	3.43935	3.01468	2.39951	2.54147	2.95082	2.70952	2.47027	2.78797	2.59782	2.45278	3.13343	2.67895	2.44181	2.30072	1.98838	2.49424	3.05215	3.07828	2.99553	2.98544	3.07746	2.92938	3.94816	3.42522	3.1811	2.79185	2.54364	2.53736
NM_003222	TFAP2C	Homo sapiens transcription factor AP-2 gamma (activating enhancer binding protein 2 gamma) (TFAP2C), mRNA.	1.64646	1.64e-08	0.000269862	5.20083	5.11392	4.96985	4.82369	4.95969	4.45392	4.93041	4.50434	4.66803	5.05038	4.83816	3.75685	3.9998	3.56962	3.92244	4.09571	3.69093	3.94293	3.23251	3.20403	3.20267	2.92389	3.2632	2.9942	3.83532	2.88738	3.81819	3.22804	3.53626	3.29414	3.11493	2.76373	3.89021	3.30079	3.93415	3.94598	3.88901	4.51878	3.93315	3.37577	3.0033	3.72902	4.39134	3.78365
NM_024057	NUP37	Homo sapiens nucleoporin 37kDa (NUP37), mRNA.	1.64599	3.26e-13	5.36433e-09	5.15292	6.1401	6.11092	5.97876	6.54704	5.96983	6.36689	4.78811	6.05186	6.52706	4.54862	5.05533	4.79598	4.8945	5.39232	5.02592	5.7901	5.16046	4.509	5.06338	5.19318	5.06703	5.54413	5.21155	4.51648	2.50868	4.92202	4.64961	4.65347	5.23281	4.88767	4.61269	5.53947	5.12716	4.60934	5.3849	4.76401	5.04326	3.7245	5.77442	5.63522	4.77617	4.01516	3.8172
NM_033084	FANCD2	Homo sapiens Fanconi anemia, complementation group D2 (FANCD2), transcript variant 1, mRNA.	1.64493	3.68e-18	6.05544e-14	3.97839	4.17415	4.08661	3.89851	3.87143	3.86228	3.99372	3.68957	3.98514	4.20164	4.03231	2.65274	2.70207	2.61666	2.65188	2.8108	2.83732	2.79338	2.27542	2.44529	2.44529	2.30804	2.32271	3.5497	2.81024	2.5485	2.83533	2.30813	2.18129	2.15121	2.16689	2.87831	2.76987	3.18113	2.86717	3.02682	2.81111	2.84252	3.02953	3.26734	3.27929	2.71921	3.23111	2.98828
NM_002668	PLP2	Homo sapiens proteolipid protein 2 (colonic epithelium-enriched) (PLP2), mRNA.	1.6446	6.76e-11	1.11236e-06	8.77055	9.40359	8.83883	8.9196	9.04506	8.90476	9.08715	7.67966	7.91684	9.14572	7.434	8.24883	8.97183	8.1865	8.21905	8.50839	8.20311	9.06669	8.23881	8.40875	7.69377	7.86647	7.74213	6.96197	7.6103	4.78864	8.22662	7.78681	7.63654	8.35273	8.36182	7.97288	8.76353	8.67768	8.0823	8.89125	9.60753	8.74443	7.77449	8.477	8.69424	8.356	8.94789	7.75555
NM_004456	EZH2	Homo sapiens enhancer of zeste homolog 2 (Drosophila) (EZH2), transcript variant 1, mRNA.	1.64441	2.76e-14	4.54158e-10	5.34964	5.70644	5.66623	5.64014	5.33611	5.08667	5.77884	4.87165	5.60724	5.73851	5.5876	4.25192	4.60855	4.12471	4.12806	4.59785	5.32804	4.61616	3.64444	4.42834	4.34385	4.13909	3.88083	5.20181	4.24515	3.90822	4.57993	4.15151	3.56503	4.21403	4.07482	4.49485	4.43467	5.07177	4.8286	4.8952	4.68288	4.79896	4.41905	5.28514	5.27763	4.62572	4.42581	4.46352
NM_001024736	CD276	Homo sapiens CD276 molecule (CD276), transcript variant 1, mRNA.	1.64409	6.87e-20	1.13046e-15	5.88093	6.04898	5.8728	6.20077	6.53301	6.14739	6.1792	6.07676	6.0507	6.80073	6.19299	5.71817	5.86908	5.77507	5.62249	5.66086	5.7576	5.82025	5.24053	4.97324	4.95093	4.90564	5.23016	4.71673	4.9461	4.75839	5.49238	5.347	5.27484	5.57402	5.43256	5.15549	6.23095	5.82099	5.71308	6.14637	6.18137	5.79556	5.65366	5.55724	5.74053	5.46738	6.22309	5.43816
NM_007315	STAT1	Homo sapiens signal transducer and activator of transcription 1, 91kDa (STAT1), transcript variant alpha, mRNA.	1.64278	5.61e-10	9.23125e-06	7.98883	8.73146	8.94255	8.44044	9.85822	8.5216	9.01247	7.12975	7.59491	8.72562	7.5229	6.58884	6.84344	7.91287	7.26454	7.1777	8.4052	6.99538	6.67996	7.30646	7.41126	7.4056	7.63003	8.63831	8.39504	4.4692	7.39526	6.68083	7.35185	7.7639	7.61941	7.34053	7.80668	8.66413	8.44787	8.02996	7.68157	8.25795	7.14831	7.61164	7.60467	7.3817	6.66003	6.8439
NM_001992	F2R	Homo sapiens coagulation factor II (thrombin) receptor (F2R), mRNA.	1.64176	3.79e-13	6.23644e-09	7.02454	7.55027	7.46336	7.43205	7.82702	7.15271	7.14909	5.64097	6.27063	6.95984	6.5131	5.58465	6.58197	5.09149	5.70954	7.14557	6.64346	6.44721	5.54216	6.39614	6.66349	5.92651	5.67466	6.33633	5.94528	4.19431	6.32218	5.27682	5.95545	5.87831	5.89756	5.01148	5.59772	6.10362	5.75943	6.22255	6.66879	5.6815	5.17889	6.51341	6.9632	6.86898	6.63813	6.0854
NM_001257	CDH13	Homo sapiens cadherin 13, H-cadherin (heart) (CDH13), mRNA.	1.64158	2.56e-12	4.21248e-08	5.48385	6.17193	5.23041	5.63979	6.46913	6.22406	5.62999	5.22149	4.90428	5.35977	5.50344	4.91151	4.42092	4.14272	4.39205	4.24879	4.2949	4.25965	4.82841	4.28716	3.34689	3.94329	3.96729	3.86765	4.62936	3.85079	5.73478	4.12208	4.09948	3.91043	3.86476	3.65234	4.44878	4.20332	4.0548	4.56661	4.86261	4.32193	5.81874	3.68196	4.31775	3.84023	4.18707	4.17162
NM_003707	RUVBL1	Homo sapiens RuvB-like 1 (E. coli) (RUVBL1), mRNA.	1.64082	7.44e-18	1.22425e-13	5.54753	6.26977	5.86799	5.74343	6.09437	5.99401	5.99678	5.06066	5.95064	5.74261	5.80803	4.89084	4.85842	4.8084	4.87367	5.0822	5.15161	5.16543	4.17541	4.58741	4.46563	4.4065	4.11056	4.69698	4.26244	3.82021	5.40603	4.60926	4.69571	4.29069	4.99872	4.31507	5.08421	5.05344	4.67146	4.94236	5.15449	4.92344	4.8621	4.92448	4.92575	4.55835	4.24335	3.99617
NM_005245	FAT	Homo sapiens FAT tumor suppressor homolog 1 (Drosophila) (FAT), mRNA.	1.64011	8.16e-16	1.34273e-11	7.15454	7.69733	6.72248	7.39703	6.69719	7.25869	6.74103	5.8985	6.93311	6.86574	7.06941	5.65115	6.94434	5.58236	5.92494	6.2944	6.16148	7.03302	5.7359	5.762	5.88767	5.79538	5.36206	5.7489	6.50303	4.18857	7.11983	5.82337	5.89222	5.91716	5.6174	5.64153	6.3897	6.59345	6.67116	6.65114	6.71106	6.24429	6.83271	6.1988	6.47615	6.87734	6.52898	5.59017
NM_001798	CDK2	Homo sapiens cyclin-dependent kinase 2 (CDK2), transcript variant 1, mRNA.	1.64007	2.38e-18	3.91629e-14	6.07097	6.35658	6.31588	5.96793	5.9033	6.34154	6.06844	4.62656	5.35966	6.44172	5.70205	5.15335	5.14577	5.36043	5.31769	4.73869	5.275	5.197	5.14415	5.28672	5.13464	5.02068	5.23937	5.07431	5.29349	4.07175	5.22822	4.1104	5.069	4.35163	4.63383	4.66957	5.42175	5.68977	4.91574	6.0969	6.04895	5.77637	5.32358	5.3034	5.69545	4.86881	4.99109	4.74503
NM_153811	SLC38A6	Homo sapiens solute carrier family 38, member 6 (SLC38A6), mRNA.	1.63981	2.08e-11	3.42264e-07	4.02162	4.37146	4.78748	4.07894	5.56928	4.12672	4.55002	3.78406	4.28908	5.64924	4.74594	3.23484	2.7724	3.34248	3.54242	3.67458	4.1617	2.94174	3.11612	3.68348	3.47769	3.77383	3.90294	3.80654	3.44652	2.63748	3.83577	3.93046	4.09649	4.25898	4.01958	3.83746	4.33753	3.5191	3.37541	3.69887	3.6036	3.50206	3.43362	4.09789	3.91962	3.02115	3.39119	2.81673
NM_024656	GLT25D1	Homo sapiens glycosyltransferase 25 domain containing 1 (GLT25D1), mRNA.	1.63925	7.06e-20	1.16172e-15	7.44263	7.76181	7.65047	7.43263	7.89227	7.9422	7.67908	6.83693	6.79756	7.16848	6.54344	6.54911	7.03367	6.56324	6.56708	6.37247	7.10221	6.97733	6.68685	6.72879	6.4294	6.21088	6.69974	6.71407	6.71048	5.42082	6.64837	6.28784	6.466	6.32956	6.92982	6.2475	6.75042	6.86696	6.26328	6.92793	7.17741	6.84926	6.63575	6.65061	7.00167	6.72804	6.3329	6.32927
NM_002318	LOXL2	Homo sapiens lysyl oxidase-like 2 (LOXL2), mRNA.	1.63902	1.06e-18	1.74423e-14	6.50117	6.55505	6.28167	6.45023	6.56126	6.69371	6.40843	6.02678	5.67097	6.4104	6.67907	5.17579	5.50473	5.29178	5.32318	5.31954	5.15693	5.38982	4.83467	4.98424	5.01898	4.83706	4.92457	4.93078	5.43256	4.76498	6.28628	4.9751	5.1145	5.1481	5.34887	5.18209	5.52059	5.57945	5.60725	5.69581	5.90957	5.12169	6.14407	4.98434	5.32327	5.3914	5.32327	5.01311
NM_001040409	MTHFD2	Homo sapiens methylenetetrahydrofolate dehydrogenase (NADP+ dependent) 2, methenyltetrahydrofolate cyclohydrolase (MTHFD2), nuclear gene encoding mitochondrial protein, transcript variant 2, mRNA.	1.63815	3.16e-09	5.19978e-05	8.2841	7.31359	8.27239	8.33418	8.6336	7.59723	8.82288	6.36578	8.24888	8.51536	7.15871	5.62021	5.66469	6.51232	7.03066	6.28299	7.07344	5.91293	6.30688	6.88886	6.12425	6.92985	7.04708	7.11533	6.22531	3.78724	6.70069	6.14958	6.89068	6.51265	6.42215	6.67037	7.71626	7.99232	7.39921	7.1799	6.88216	7.42412	6.24748	7.29971	6.63276	6.89091	3.76379	4.74371
NM_000884	IMPDH2	Homo sapiens IMP (inosine monophosphate) dehydrogenase 2 (IMPDH2), mRNA.	1.63812	7.39e-14	1.21602e-09	7.45265	8.14803	8.39067	7.92397	8.19051	7.88362	7.45258	6.64582	7.47185	7.98548	6.74005	6.59191	7.08833	7.09903	7.35017	6.89724	7.14558	7.1163	6.58892	7.37481	7.21035	7.22469	6.90729	7.07174	6.73604	4.1444	7.88859	6.47823	6.9967	6.57253	6.90101	6.46602	7.35658	7.60759	6.25023	7.03706	7.11883	7.18626	6.3726	7.62816	7.70665	7.42629	5.91704	6.12129
NM_000715	C4BPA	Homo sapiens complement component 4 binding protein, alpha (C4BPA), mRNA.	1.63744	5.96e-08	0.000980718	2.11933	2.89901	2.31986	1.85271	1.98174	2.15008	2.52888	2.02308	2.25847	3.01733	3.21252	1.88632	1.68672	1.4162	1.37731	1.54719	1.63782	1.73951	2.05684	1.91026	1.58891	1.85846	1.65215	2.13116	2.97427	2.04298	1.31512	1.6384	1.51491	1.34256	1.52204	2.03422	1.56455	2.09214	1.63811	1.50226	2.19601	1.53278	1.51045	1.9686	1.56444	1.56444	2.24301	1.36147
NM_000610	CD44	Homo sapiens CD44 molecule (Indian blood group) (CD44), transcript variant 1, mRNA.	1.63742	1.22e-10	2.00751e-06	7.06876	7.74671	7.3603	6.93343	7.43376	7.56785	7.29507	5.85262	6.52428	7.65766	6.08543	5.67589	6.34589	5.6787	6.06596	6.41548	6.73836	6.35168	5.97969	6.36213	6.02929	5.98478	6.19668	7.91644	6.24922	4.44419	6.34452	5.54888	6.09036	5.74232	6.20298	6.0462	6.54438	6.46425	5.95492	6.17605	6.83925	6.11455	6.75802	6.16242	6.50267	6.57433	4.76915	5.96527
NM_015000	STK38L	Homo sapiens serine/threonine kinase 38 like (STK38L), mRNA.	1.63681	1.91e-09	3.1429e-05	6.63629	7.63488	7.20035	7.21565	7.55007	7.72117	7.42805	5.00711	6.36055	7.48546	6.22409	5.8195	6.00867	5.76811	6.18124	5.92985	6.46415	6.05157	5.61201	7.76892	5.77642	5.91199	6.20058	6.70234	5.95229	3.71394	6.40113	6.43096	6.75228	5.54108	5.97684	5.66042	6.83346	6.53207	5.87447	7.27531	6.76277	6.41448	7.73893	5.95823	6.39223	5.4532	4.40347	4.74322
NM_004987	LIMS1	Homo sapiens LIM and senescent cell antigen-like domains 1 (LIMS1), mRNA.	1.63512	1.72e-10	2.83026e-06	7.20356	8.22874	7.19531	6.82108	6.47958	7.34035	7.635	4.63202	7.22758	6.82881	6.28252	7.14201	6.0928	5.65802	7.18565	8.14779	6.66131	6.54323	5.83435	5.6259	6.97248	6.83718	5.48831	6.53043	6.08983	3.00121	7.68645	6.44254	6.76786	5.8392	5.35868	5.1882	5.79465	7.24592	6.73823	7.39893	7.24237	7.13323	7.30188	6.54938	6.60276	5.78701	5.69353	5.11832
NM_020647	JPH1	Homo sapiens junctophilin 1 (JPH1), mRNA.	1.63434	9.02e-10	1.48424e-05	5.18626	6.09407	4.98006	5.60352	5.5838	5.97426	5.50194	4.54121	4.76523	5.58654	5.08351	4.30157	4.59839	4.21293	4.46163	4.75425	4.72997	4.44659	4.00658	4.30276	3.88836	4.05083	3.7823	3.66071	3.86987	3.62342	3.97476	3.23265	4.6005	3.53605	3.59128	3.26725	4.49785	4.3978	4.346	4.56331	4.59363	4.65372	4.60027	4.38013	4.27761	3.56147	4.044	4.23295
NM_014865	NCAPD2	Homo sapiens non-SMC condensin I complex, subunit D2 (NCAPD2), mRNA.	1.63339	1.62e-18	2.66571e-14	6.67373	7.1653	6.88237	6.90794	6.7634	6.94995	7.27163	5.87225	6.85181	6.40727	6.0796	5.41534	5.91406	5.72774	5.65043	6.19825	5.69228	6.05219	5.16443	5.72096	5.73876	5.29245	5.23869	5.54283	5.61705	3.94751	5.50346	4.92373	5.81519	5.23481	5.05411	4.86477	6.01357	6.57842	6.07978	6.39179	6.40246	6.10313	5.50681	5.88275	5.83251	6.02523	5.94861	5.40722
NM_002794	PSMB2	Homo sapiens proteasome (prosome, macropain) subunit, beta type, 2 (PSMB2), mRNA.	1.63329	1.52e-11	2.50116e-07	8.852	9.42614	9.06469	8.84475	9.58644	8.93934	8.74764	6.86394	8.59393	9.61778	7.65585	7.8401	8.76845	8.14232	8.43867	8.52747	8.6349	8.7868	7.85921	8.80542	8.75037	8.47402	8.44047	8.1334	7.77311	4.31876	8.11539	7.33123	8.03993	7.40831	8.57807	7.72283	8.71148	8.92383	7.80912	8.65898	8.76849	8.74674	7.83417	8.70576	9.10643	8.39803	7.64976	7.29201
NM_006143	GPR19	Homo sapiens G protein-coupled receptor 19 (GPR19), mRNA.	1.63269	1.02e-10	1.67841e-06	3.86811	5.43025	3.51754	4.12924	4.10832	2.48691	4.68848	3.99496	4.74333	2.51776	3.46216	1.83963	2.64017	2.68435	2.53169	2.94818	2.43187	2.51515	3.10345	3.15207	3.25566	2.21081	2.76945	2.17618	2.78813	2.28615	1.08406	0.982904	1.71313	1.80143	1.67337	2.1692	2.93292	2.22531	1.97117	2.71185	3.12235	3.96548	2.60685	2.41413	1.52302	3.06586	4.70244	1.89892
NM_001111	ADAR	Homo sapiens adenosine deaminase, RNA-specific (ADAR), transcript variant 1, mRNA.	1.63194	3.1e-14	5.10105e-10	7.80464	8.61936	8.12684	8.10139	8.20762	8.15533	8.3129	6.51818	7.61827	8.08394	7.55227	6.84485	7.25847	7.20102	7.27741	7.33488	7.24538	7.44114	6.8507	6.8262	7.38046	7.10811	7.01034	7.11728	7.10421	4.56494	7.22426	6.22261	6.94985	6.60457	6.4029	6.18466	7.35096	7.93856	7.69429	7.70282	8.20001	7.69342	7.48427	7.64897	7.41911	7.10696	6.67287	6.59215
NM_014142	NUDT5	Homo sapiens nudix (nucleoside diphosphate linked moiety X)-type motif 5 (NUDT5), mRNA.	1.63152	3.42e-14	5.62761e-10	5.09657	5.13308	4.95498	4.86389	5.41005	4.9931	5.20881	4.3678	5.00732	5.36177	4.94265	4.76968	5.17169	4.09571	4.56418	4.17159	5.11629	5.42075	4.96786	4.23932	4.42639	3.86779	4.632	4.09629	3.81011	2.6475	4.27682	4.41688	3.81631	4.08633	4.23594	3.45658	5.16036	4.79592	4.29213	4.33264	4.26051	4.7054	3.76318	5.70172	5.29599	4.96092	4.61057	4.21755
NM_005156	ROD1	Homo sapiens ROD1 regulator of differentiation 1 (S. pombe) (ROD1), mRNA.	1.63079	4.3e-12	7.07565e-08	8.75786	8.78156	9.02994	9.10292	8.37028	8.40018	8.99383	6.48908	8.71371	9.21085	7.80192	7.95441	7.85271	7.98135	8.09717	8.36905	7.99204	7.97292	7.89075	7.68369	8.62697	8.07855	8.1367	7.94105	7.83634	5.37503	8.03986	6.35797	8.03817	7.83883	7.40474	7.51321	8.67444	8.97434	8.37076	9.15246	9.35883	8.81867	6.97388	8.49863	8.55219	7.9442	6.88228	7.1711
NM_016101	NIP7	Homo sapiens nuclear import 7 homolog (S. cerevisiae) (NIP7), mRNA.	1.62851	8.9e-15	1.46449e-10	7.09708	7.10118	7.14403	7.05388	7.1733	7.24106	7.36674	6.07704	6.31735	7.85775	5.74353	5.36384	5.86342	5.50907	5.86177	5.10037	6.4535	5.75539	5.30024	5.8076	5.46848	5.30513	6.18188	6.1403	6.25436	3.68549	6.65428	6.0453	6.06085	5.58121	5.85317	5.8866	6.55804	6.55482	5.20273	6.9546	7.00525	6.33756	5.42237	6.85199	6.88653	5.78706	6.10905	5.62529
NM_000700	ANXA1	Homo sapiens annexin A1 (ANXA1), mRNA.	1.62803	4.51e-08	0.000742121	9.27481	9.77007	9.11709	9.07956	10.2302	9.13892	9.32851	7.23833	7.47603	9.57113	7.0039	9.36879	7.14341	7.19116	8.69243	9.07176	8.92935	7.3941	9.39061	8.58741	8.54686	8.41406	8.69374	8.43735	9.62834	4.12752	10.0662	7.65253	8.58361	6.83268	7.28472	6.5165	7.64772	9.01256	7.39715	9.0397	10.0038	8.91171	7.82096	7.66153	8.11596	7.33193	4.88925	6.22004
AK124759	LRRC37B2	Homo sapiens cDNA FLJ42769 fis, clone BRAWH3003555.	1.62775	2.08e-09	3.42264e-05	3.56486	4.87927	4.24892	4.23358	4.3979	3.92151	3.9863	2.72359	3.78102	4.65188	4.90728	4.45144	4.34044	3.90812	4.63691	4.47531	4.60789	4.54487	3.81301	3.43182	4.50523	4.62394	3.46706	3.06532	4.74511	1.86759	4.15356	4.53699	4.37493	5.37651	3.85649	4.81372	4.5315	4.65383	3.70677	4.52557	4.02698	4.36957	3.98808	4.27943	3.25476	3.48834	4.46781	3.44497
NM_000874	IFNAR2	Homo sapiens interferon (alpha, beta and omega) receptor 2 (IFNAR2), transcript variant 2, mRNA.	1.62707	1.13e-11	1.85941e-07	5.69688	5.88649	6.33566	5.62112	6.5565	5.67216	5.96303	4.88487	5.09147	6.89106	5.84561	4.60107	5.44506	4.02547	4.67654	5.62488	5.60266	5.86092	4.32479	5.72287	5.36586	4.73052	5.09794	5.23793	4.93178	3.22001	4.98887	4.46321	4.97937	5.0775	4.75766	4.54478	5.7035	5.19045	4.70254	5.19501	5.16598	4.63534	5.25074	6.34857	5.88226	5.23964	4.49292	4.81915
NM_033229	TRIM15	Homo sapiens tripartite motif-containing 15 (TRIM15), mRNA.	1.6257	2.46e-10	4.04793e-06	5.75173	5.70313	5.83301	6.08274	5.54608	5.57138	5.87297	5.75825	5.57512	6.07031	5.91498	4.92783	6.12221	5.14606	5.08341	5.45785	5.29231	5.74319	4.51394	4.78801	4.74838	4.61367	4.52426	4.5194	5.02566	4.74692	4.64264	4.60502	4.70297	4.38825	5.01126	4.3901	4.76228	4.55792	4.64872	5.06521	5.03252	5.3928	4.57871	4.21735	4.75135	5.8251	4.31609	4.49414
NM_024524	ATP13A3	Homo sapiens ATPase type 13A3 (ATP13A3), mRNA.	1.62543	3.11e-13	5.11751e-09	6.96796	7.13797	7.20037	6.83587	6.99083	7.26178	7.05891	5.53379	6.5677	7.4605	6.26004	5.30332	5.22726	5.76179	5.90599	5.48312	5.73698	5.32857	5.20496	5.23349	5.63492	5.90178	5.73669	5.91165	6.50205	3.73464	7.37398	5.57899	6.21575	5.98255	5.12968	5.89246	6.2684	7.18126	6.46932	6.97817	6.68198	6.27854	6.15939	7.11186	6.31958	5.92713	5.51144	5.16443
NM_022662	ANAPC1	Homo sapiens anaphase promoting complex subunit 1 (ANAPC1), mRNA.	1.62538	2.18e-16	3.58719e-12	6.95516	7.33086	7.01319	7.30458	7.24053	7.13904	7.40677	6.47022	6.5721	6.48377	6.70757	5.63556	5.37316	5.08599	5.72816	5.739	5.49843	5.21846	5.31516	5.55761	5.60094	5.85152	4.96276	5.61489	5.46324	5.26805	6.43475	5.40266	6.03808	5.41577	4.76971	5.56243	5.84345	6.46427	6.14263	6.56922	6.32381	6.66595	6.13875	6.23865	5.75832	5.17007	6.07121	4.27163
NM_152259	C15orf42	Homo sapiens chromosome 15 open reading frame 42 (C15orf42), mRNA.	1.62523	3.78e-13	6.21999e-09	4.97547	4.8741	4.71314	4.95227	4.73465	4.77585	4.64191	4.80341	4.30627	4.55901	5.25152	3.63442	3.87996	3.79811	3.33319	4.16144	3.67711	3.96267	3.31803	3.10437	3.16511	3.26343	3.3458	3.46766	3.8498	4.07566	3.46366	3.27975	3.24054	3.03055	3.3722	3.495	3.07447	3.09653	3.45069	3.39613	3.33359	3.41024	3.54646	3.87458	3.95504	3.77028	3.96208	4.12022
NM_012426	SF3B3	Homo sapiens splicing factor 3b, subunit 3, 130kDa (SF3B3), mRNA.	1.62434	9.27e-19	1.52538e-14	7.6622	8.15599	7.89832	8.04727	7.97255	8.04816	7.98981	6.56991	7.76584	7.81015	7.22924	6.90871	7.10076	6.91135	7.03817	7.1069	6.8714	7.14142	6.7956	6.66008	6.95316	6.68619	6.69893	6.65381	7.27581	5.03412	7.40971	6.52101	7.26649	6.72384	6.5635	6.58247	7.47934	7.57183	7.08525	7.74451	7.72981	7.46973	6.94727	7.20694	6.97447	6.96144	6.74057	6.30802
NM_024838	THNSL1	Homo sapiens threonine synthase-like 1 (S. cerevisiae) (THNSL1), mRNA.	1.6241	3.96e-11	6.51618e-07	2.76081	2.81169	2.63823	2.59184	2.90256	3.02455	3.37149	2.7564	3.33084	3.43561	3.04683	1.76829	2.00845	2.26149	1.9258	1.6816	1.90786	1.67647	1.7189	2.413	2.00059	2.11867	1.83975	2.13546	1.74373	1.54911	2.1969	1.48945	1.94071	1.46672	1.57949	1.89534	2.09452	1.91066	1.6279	1.68898	1.6494	1.55653	1.55215	2.82067	2.05939	2.12229	2.44087	1.22752
NM_139207	NAP1L1	Homo sapiens nucleosome assembly protein 1-like 1 (NAP1L1), transcript variant 1, mRNA.	1.6237	9.81e-08	0.00161424	5.88518	6.33922	6.18522	6.20547	7.55673	7.27976	6.98304	4.71164	5.65336	6.40707	4.71355	3.36642	3.18752	4.12969	4.18174	3.7742	5.36879	3.66723	2.768	4.03317	3.57386	4.21747	3.98872	5.102	4.96106	2.2242	5.15033	6.51765	5.50631	4.83813	3.87694	3.64507	5.5927	5.45578	4.26042	5.33692	5.58071	5.13727	5.51036	5.33742	4.46802	3.49777	3.78167	2.59133
NM_022116	FIGNL1	Homo sapiens fidgetin-like 1 (FIGNL1), transcript variant 2, mRNA.	1.62355	3.93e-14	6.46682e-10	3.82413	4.32528	4.08493	3.70977	4.39955	3.64253	3.92187	3.36043	3.7444	4.26212	3.50555	2.15301	2.80494	2.21985	2.90552	2.17929	3.00798	2.94199	2.9074	3.12854	2.84608	3.18716	2.55953	3.61174	2.82558	2.68196	2.71919	2.86252	2.40123	2.59966	2.96012	2.78443	2.58722	3.06247	2.67399	2.7512	2.9071	2.60654	2.47212	3.89421	3.66644	3.41806	2.867	2.17558
NM_024808	C13orf34	Homo sapiens chromosome 13 open reading frame 34 (C13orf34), mRNA.	1.62302	8.14e-17	1.33944e-12	3.8833	4.22223	4.54113	4.08036	3.76307	4.01055	4.27347	4.02399	3.88325	4.35099	3.6302	3.29456	3.49746	3.3769	3.45842	3.58737	3.66133	3.25873	2.45396	3.01465	3.49792	3.08349	3.24394	3.68393	2.91302	2.55199	3.19285	3.08087	2.85487	3.3557	3.11938	3.12893	2.95316	3.23663	2.90352	3.44666	2.89433	3.2523	2.49569	3.8236	3.73016	3.02714	2.97931	3.092
NM_022977	ACSL4	Homo sapiens acyl-CoA synthetase long-chain family member 4 (ACSL4), transcript variant 2, mRNA.	1.62256	2.16e-14	3.55428e-10	6.2232	6.46041	6.37136	5.65688	6.86545	6.45267	6.33966	4.94603	5.8644	6.6795	5.3467	4.93237	5.03371	4.55187	5.06819	5.05698	5.58136	5.29202	4.37282	4.51372	4.84343	4.52121	5.37939	5.02055	5.16396	3.47975	5.6319	5.1383	5.1682	5.13184	4.74787	4.61045	5.69549	5.46574	4.54194	5.62723	5.51908	4.83723	5.21003	5.13968	5.54016	4.68207	3.79401	4.04086
NM_006855	KDELR3	Homo sapiens KDEL (Lys-Asp-Glu-Leu) endoplasmic reticulum protein retention receptor 3 (KDELR3), transcript variant 1, mRNA.	1.62242	3.3e-11	5.43015e-07	6.49237	6.77951	6.61955	7.10054	6.39793	5.72148	6.52984	5.61319	5.4225	7.04403	5.09867	5.44195	5.65376	6.01321	5.89098	6.49464	5.09225	5.74867	5.11404	5.90335	5.80135	5.6199	6.39033	5.96717	5.22033	4.31925	5.91323	4.05509	6.61729	4.73963	5.28867	4.49613	6.17208	6.13697	5.85707	6.77081	7.20212	6.52454	4.3549	5.70075	6.23267	5.42128	5.15181	4.61297
NM_003091	SNRPB	Homo sapiens small nuclear ribonucleoprotein polypeptides B and B1 (SNRPB), transcript variant 2, mRNA.	1.62215	8.53e-18	1.40361e-13	7.42134	7.07261	7.36207	7.27671	7.10754	7.10176	7.33863	6.32951	6.605	7.75307	6.52567	6.39708	6.94999	6.59494	6.48541	6.10568	6.37353	6.76297	6.24265	6.54012	5.97707	5.92643	6.11843	5.61948	6.50843	4.21839	5.90927	5.22696	5.70621	5.72709	6.206	5.57974	6.46698	6.67329	5.49323	6.89989	6.85264	6.51542	5.33929	6.55338	7.23519	6.5049	6.37298	5.77093
NM_003391	WNT2	Homo sapiens wingless-type MMTV integration site family member 2 (WNT2), mRNA.	1.62197	2.22e-11	3.65301e-07	4.99881	4.27892	4.80625	4.41489	4.68607	4.45198	4.317	5.09702	4.8813	5.19707	5.34642	3.58952	3.42363	3.52286	3.42363	3.4345	3.3179	3.40967	3.42627	3.40028	3.53031	3.40301	3.52434	3.55799	3.4528	3.73485	3.23458	3.16297	3.10632	2.93425	3.12322	3.18633	2.9105	3.0912	3.31898	3.05623	3.15278	3.12805	3.12595	3.69483	3.50396	3.95195	3.84642	3.68299
NM_032933	C18orf45	Homo sapiens chromosome 18 open reading frame 45 (C18orf45), mRNA.	1.62185	1.18e-13	1.94169e-09	4.64591	4.99827	4.69484	4.85747	4.73972	4.74284	4.94452	4.42465	4.71052	4.83007	4.60914	3.64145	3.5828	3.29151	3.39202	3.48229	3.55172	3.75276	3.37636	3.37509	3.4324	3.28603	3.34091	3.47746	3.69099	2.7413	3.21685	3.05999	3.1753	2.73318	2.82126	2.86478	3.69838	3.49311	3.25691	3.7365	3.7674	3.54223	3.40847	3.88805	3.78651	3.85759	3.5492	3.02307
NM_001010893	SLC10A5	Homo sapiens solute carrier family 10 (sodium/bile acid cotransporter family), member 5 (SLC10A5), mRNA.	1.62177	1.2e-12	1.9746e-08	7.07931	7.46235	7.37632	7.35562	7.28783	7.34348	7.57426	5.07631	6.56651	7.11316	6.10967	5.26169	4.84354	5.83329	6.23951	5.47988	5.14654	4.95745	4.97042	5.84663	5.80937	5.91606	5.47774	6.36736	5.96113	3.21253	6.66997	5.25414	6.09984	5.31352	5.08562	4.26105	5.58601	6.57727	6.26275	6.75796	6.77694	6.73587	6.14009	5.48393	5.32134	5.22028	4.13908	4.16626
NM_018256	WDR12	Homo sapiens WD repeat domain 12 (WDR12), mRNA.	1.6214	3.23e-15	5.31496e-11	6.27003	6.57824	6.45155	6.21269	6.72477	6.21476	6.29416	5.78581	6.37885	7.33461	6.04923	5.27113	5.77511	5.54991	5.78374	5.53075	6.22005	5.98662	4.7665	5.69434	5.45474	5.50466	5.66132	5.86705	5.02962	4.11819	5.92575	5.45409	5.23165	5.63098	5.75392	5.47949	5.64835	5.99839	5.28234	5.52858	5.22493	5.49282	4.74589	6.32144	5.96315	5.33962	5.23983	5.05947
NM_018837	SULF2	Homo sapiens sulfatase 2 (SULF2), transcript variant 1, mRNA.	1.62136	2.23e-12	3.66946e-08	7.02855	7.26724	6.89361	6.95183	8.00629	7.64724	6.98069	6.20721	6.37498	7.18053	6.2848	6.09467	6.40376	5.79643	5.83793	5.98901	6.55612	6.32005	6.19129	6.0563	5.69841	5.5732	5.80382	5.96519	6.51225	5.36982	6.6445	5.68197	6.09142	5.5647	5.95591	5.15203	6.07532	5.76814	5.80249	5.85245	6.38435	6.18204	6.2462	5.56905	6.09051	6.12779	6.61849	5.80429
NM_000602	SERPINE1	Homo sapiens serpin peptidase inhibitor, clade E (nexin, plasminogen activator inhibitor type 1), member 1 (SERPINE1), mRNA.	1.6213	2.71e-08	0.00044593	8.25925	6.99129	7.89056	6.94389	8.92089	8.48155	7.14043	6.75501	6.48271	8.61262	6.52385	6.68761	6.11704	6.01384	6.92523	6.28764	8.7568	5.89945	6.93242	6.91717	6.02428	6.69298	8.36501	6.75703	6.06108	5.23843	6.73245	5.19117	5.26908	4.9755	6.29841	5.56086	6.87479	6.77393	6.14088	7.375	7.88024	6.50692	6.69366	4.95137	5.54199	5.48361	5.23455	5.05244
NM_080476	PIGU	Homo sapiens phosphatidylinositol glycan anchor biosynthesis, class U (PIGU), mRNA.	1.62024	3.3e-14	5.43015e-10	6.4738	6.77155	6.71496	6.31189	6.19089	6.58053	6.3298	5.5363	6.53033	6.75666	6.07651	5.9743	6.09411	5.78913	6.06469	5.48006	5.69702	6.23158	5.3745	5.73506	5.85438	5.46514	5.92192	5.02763	5.19171	4.11106	5.3058	4.65132	5.3718	5.11751	4.75745	5.136	5.91329	6.25855	5.61913	6.17674	6.33993	5.90468	5.36855	6.11045	6.4738	5.98121	5.94685	5.31448
NM_018115	SDAD1	Homo sapiens SDA1 domain containing 1 (SDAD1), mRNA.	1.62002	1.09e-06	0.0179359	6.58614	8.52791	7.05946	7.32862	7.06196	7.70949	7.17688	3.70894	7.37524	7.20831	6.36865	6.55996	5.10472	5.57728	6.97292	6.50069	5.95446	5.31353	6.62558	6.45057	7.27816	7.38815	6.75612	6.43105	6.02605	2.82907	6.79306	4.11702	6.38666	5.02322	4.4688	4.53575	5.92721	7.08373	6.3558	7.61201	7.71524	6.88524	6.86845	7.13421	6.79971	5.09629	4.43429	4.1751
NM_002350	LYN	Homo sapiens v-yes-1 Yamaguchi sarcoma viral related oncogene homolog (LYN), mRNA.	1.61987	5.16e-15	8.49078e-11	7.13624	7.314	7.52128	6.98212	7.02265	6.89251	7.54385	5.51383	6.2958	6.97122	6.11838	5.07305	6.04875	5.21583	5.76165	6.06469	6.11964	6.21054	4.8583	5.80795	6.01709	5.86078	5.63975	7.07122	6.76846	4.09049	6.61802	5.66275	5.90695	5.70029	5.4373	5.37465	6.2406	7.06379	5.73178	6.75284	6.89655	6.40375	5.83459	6.52886	6.49059	6.56615	4.99772	5.25146
NM_004168	SDHA	Homo sapiens succinate dehydrogenase complex, subunit A, flavoprotein (Fp) (SDHA), nuclear gene encoding mitochondrial protein, mRNA.	1.61969	2.15e-09	3.53783e-05	5.71897	5.7907	6.46466	5.9948	5.72576	5.61205	5.76089	5.79033	5.53906	6.26692	5.71865	4.79274	5.49044	4.99032	4.87273	5.59712	5.13069	5.57135	4.92666	4.89988	5.07077	4.36932	4.70938	4.36106	4.36403	4.89718	5.09599	4.14525	4.39605	4.94024	4.42669	4.37096	5.02544	5.52588	5.2261	4.92843	5.36249	5.40595	5.82175	4.76127	4.99076	4.71744	5.10841	4.9354
NM_004932	CDH6	Homo sapiens cadherin 6, type 2, K-cadherin (fetal kidney) (CDH6), mRNA.	1.6174	1.7e-14	2.79735e-10	5.31838	5.18104	5.16571	5.07222	5.79124	5.35838	5.1701	5.12193	5.43316	5.76774	5.9349	4.29527	4.0379	4.21363	4.31551	4.22569	4.36752	3.97863	4.1269	4.05193	4.19931	4.12634	3.99104	3.61286	4.41321	3.78072	5.10062	3.82933	4.12838	3.73829	3.98315	4.13161	4.221	4.28337	3.97536	4.14457	4.82234	4.25316	4.18093	4.10035	4.41212	3.87469	4.12265	4.07179
NM_017746	TEX10	Homo sapiens testis expressed 10 (TEX10), mRNA.	1.61666	2.06e-17	3.38973e-13	5.70283	6.42696	6.11849	5.92083	5.90628	6.08787	6.20023	4.30218	5.6242	6.53036	5.47634	4.34115	4.1513	4.56042	5.01961	5.11954	5.39182	4.18747	4.43217	4.79812	4.73566	4.90261	5.09895	4.99374	4.86827	2.97263	5.14617	4.35275	4.87838	4.832	4.51	4.1966	5.90708	5.39661	4.95876	5.22009	5.40472	5.32252	4.84685	5.58443	5.38866	4.61425	4.37822	4.2618
NM_001822	CHN1	Homo sapiens chimerin (chimaerin) 1 (CHN1), transcript variant 1, mRNA.	1.61643	4e-09	6.582e-05	5.85812	7.77998	6.08802	6.46987	7.19743	7.34442	6.56093	4.56101	5.26076	5.49793	5.39337	5.05127	5.14576	4.89704	5.37259	4.96272	6.23265	5.32041	4.62416	5.41542	4.79205	5.22869	4.58175	5.87409	4.91511	4.35601	5.77308	5.46318	5.67649	4.46295	5.33058	4.86375	5.11347	4.75459	4.22907	5.20514	5.2531	4.90219	5.89478	5.81315	5.39518	4.49108	4.00115	4.32801
NM_003414	ZNF267	Homo sapiens zinc finger protein 267 (ZNF267), transcript variant 498723, mRNA.	1.61573	7.91e-11	1.30159e-06	5.6978	6.42331	6.61074	6.23393	5.94722	5.9608	6.60059	4.53894	5.29843	6.63223	4.89848	4.68857	4.4571	3.89431	5.26343	5.19859	5.24429	4.32397	4.06695	4.21881	5.42577	4.88505	5.6518	5.1783	4.95468	2.18894	5.14783	3.81662	4.63308	4.68834	4.08004	4.03343	4.82397	5.61625	4.4879	6.13994	5.92407	5.33103	4.55793	5.50663	5.67328	4.07083	3.60897	3.43815
NM_022159	ELTD1	Homo sapiens EGF, latrophilin and seven transmembrane domain containing 1 (ELTD1), mRNA.	1.61546	2.29e-08	0.000376819	5.08408	6.38427	5.49056	5.33796	6.8674	6.0755	5.11393	3.56706	4.58673	5.43105	5.35525	5.54896	3.88707	3.89765	4.72763	4.31148	5.59604	4.08075	4.63962	4.56975	4.36049	5.1041	4.76007	4.39618	6.04062	2.80333	6.7107	4.54	4.60387	3.99969	4.18389	3.4913	4.65242	4.92779	3.90341	4.42849	4.92767	4.12984	4.58348	4.83537	5.16833	3.92462	3.37492	3.00943
NM_002609	PDGFRB	Homo sapiens platelet-derived growth factor receptor, beta polypeptide (PDGFRB), mRNA.	1.61546	7.61e-10	1.25223e-05	6.80388	7.55663	7.17213	7.00154	8.21449	7.77053	7.13931	6.47477	6.78549	6.89063	6.75347	6.68586	6.10499	5.64506	6.30972	6.01253	6.66981	6.15767	6.97103	6.15217	5.98004	6.11527	5.96248	5.80385	6.68962	5.60297	7.08474	5.82027	6.01287	5.37074	6.09939	5.56668	6.25138	6.16561	6.19024	6.31305	6.48907	6.35834	6.39464	5.86026	6.23576	5.96789	6.23576	6.04965
NM_003536	HIST1H3H	Homo sapiens histone cluster 1, H3h (HIST1H3H), mRNA.	1.61444	6.6e-13	1.08603e-08	5.96187	5.99369	5.9259	5.77655	5.20715	5.1786	6.09335	5.88601	5.6082	5.56856	6.59903	4.19536	5.1735	4.86383	4.5635	5.25484	5.40158	4.68927	5.36296	4.94445	5.36706	5.12605	4.91337	5.21532	4.8182	3.91503	4.58244	3.9909	3.92289	4.89903	5.53973	4.82266	5.56132	5.42835	4.99481	5.5555	5.1215	4.9481	4.98217	5.43447	6.16392	5.72791	5.51706	4.72182
NM_007192	SUPT16H	Homo sapiens suppressor of Ty 16 homolog (S. cerevisiae) (SUPT16H), mRNA.	1.61359	2.11e-12	3.472e-08	7.01111	8.05911	7.67	7.56207	8.06626	8.26154	7.81311	6.09609	7.1799	7.81391	6.60851	6.24116	6.25246	6.57723	6.79635	6.29254	6.93883	6.46869	6.05195	6.47004	6.53612	6.34646	6.33691	6.48353	6.88478	3.38606	6.88327	6.79417	7.33613	6.53178	6.42821	6.19465	6.822	6.92855	6.40403	7.07253	7.14489	6.88197	6.93222	6.99385	6.78795	6.2032	5.19475	5.84542
NM_024041	SCNM1	Homo sapiens sodium channel modifier 1 (SCNM1), mRNA.	1.61354	3.43e-12	5.64407e-08	7.10015	7.59495	7.46949	7.16102	7.56163	7.22364	7.46122	6.2289	6.66103	7.50334	5.79883	6.3467	6.77607	6.07869	6.60516	6.56545	6.65482	7.01194	6.81407	6.9077	6.60487	6.7322	6.33826	6.78394	5.88338	4.44253	6.32071	5.38689	6.27502	6.44315	6.59849	6.12821	6.61114	6.81077	6.24238	6.8457	6.78176	6.87177	6.1783	6.76728	6.96858	6.52027	5.84821	6.18593
NM_005472	KCNE3	Homo sapiens potassium voltage-gated channel, Isk-related family, member 3 (KCNE3), mRNA.	1.61342	3.58e-08	0.000589089	5.28336	6.24658	5.91692	6.24888	5.26687	4.81107	6.26821	4.82905	5.04224	5.51956	4.71986	3.29479	4.98777	4.35142	3.93267	5.37046	4.05034	5.05426	3.17168	5.14281	4.97477	4.44829	4.3471	5.36342	5.07606	2.90409	4.57067	3.04223	4.19621	3.84052	4.44239	4.16557	4.40102	5.12983	4.55551	4.80868	4.6018	4.15865	3.07953	4.95761	5.43451	5.06784	4.16683	4.58396
NM_001001330	REEP3	Homo sapiens receptor accessory protein 3 (REEP3), mRNA.	1.61275	3.28e-08	0.000539724	6.83691	7.66447	6.96765	7.23862	7.5763	7.59262	7.43384	5.56614	7.23361	7.85895	6.36069	7.05598	7.41171	6.29484	7.13676	7.31462	6.93076	7.60696	7.05255	6.53821	7.00445	6.83504	6.91244	7.01096	6.90802	3.58671	6.66596	6.56871	6.8473	6.58827	6.61097	5.14671	7.11108	7.05682	6.43296	7.15511	7.36622	7.26895	6.98272	6.60964	7.08915	6.14419	5.46688	5.4759
NM_012345	NUFIP1	Homo sapiens nuclear fragile X mental retardation protein interacting protein 1 (NUFIP1), mRNA.	1.61211	3.58e-15	5.89089e-11	5.63012	5.8384	5.97731	5.66487	5.96495	6.19167	6.19147	5.75192	5.92938	6.94921	6.6106	5.06746	4.59278	4.92969	5.01513	5.00695	5.38389	5.01362	4.88974	4.76568	5.39435	4.81885	5.14964	5.10126	5.29291	4.01719	5.25	4.92148	4.8286	4.7641	3.73017	4.93042	5.48852	5.3122	5.69069	5.24684	5.38857	5.09986	5.25782	5.0235	5.15362	4.78254	3.79414	4.73888
NM_014754	PTDSS1	Homo sapiens phosphatidylserine synthase 1 (PTDSS1), mRNA.	1.61142	4.93e-14	8.11231e-10	7.06562	7.93493	7.99177	7.35088	7.85123	7.83182	7.32255	5.76985	7.2447	7.90385	6.69141	6.03363	6.38918	6.62272	6.63457	6.5484	6.54626	6.60291	6.24599	6.53741	6.60285	6.61287	6.22519	6.63765	6.40767	4.62671	6.74686	5.80573	7.0282	5.95117	5.81826	6.0043	6.8377	7.28815	6.48457	6.81995	7.11213	6.96899	6.07043	7.15394	6.88199	6.70505	6.0142	5.79217
NM_020409	MRPL47	Homo sapiens mitochondrial ribosomal protein L47 (MRPL47), nuclear gene encoding mitochondrial protein, transcript variant 1, mRNA.	1.61118	2.5e-09	4.11375e-05	6.23872	7.11547	6.68565	5.93451	6.67857	6.28598	5.86739	4.98867	6.39454	7.85919	5.58983	5.42625	5.53482	5.43696	6.03084	6.84157	6.36749	5.97885	5.19568	6.09463	6.14794	5.86366	6.30653	5.89754	4.98921	2.19662	5.84789	5.30416	5.02966	5.76146	5.46242	5.34157	5.90924	5.8775	5.33913	5.61673	5.42248	5.50054	4.91044	6.71654	6.23162	5.11025	4.70524	4.75013
NM_004710	SYNGR2	Homo sapiens synaptogyrin 2 (SYNGR2), mRNA.	1.61112	2.02e-09	3.32391e-05	7.59003	7.40213	7.72096	7.3895	6.87408	7.30557	7.68913	6.56104	7.62074	8.08551	6.57907	6.72472	7.98806	7.24728	7.00106	7.15993	6.30413	8.10943	6.87986	7.20812	7.06036	6.84242	6.66964	6.05664	6.26947	3.17037	6.53558	6.54551	7.04543	6.43549	7.24173	6.90602	7.55781	7.77743	6.80728	7.42638	7.48882	7.29386	5.67584	7.1284	7.77501	7.70626	4.80159	6.5525
NM_002809	PSMD3	Homo sapiens proteasome (prosome, macropain) 26S subunit, non-ATPase, 3 (PSMD3), mRNA.	1.61102	5.3e-10	8.72115e-06	8.00843	8.17172	7.88352	7.77011	7.98058	8.08925	8.03184	6.8499	7.91858	8.41163	7.29908	7.19131	7.72523	7.24863	7.5241	7.07441	6.99115	7.82438	7.43902	7.26032	7.15317	7.12287	7.13843	6.88823	7.18521	5.54453	7.19962	6.16992	7.01671	6.83888	7.00288	6.52334	7.55994	7.8056	7.30587	7.78642	7.87614	7.89327	6.98802	7.11313	7.57012	7.16538	6.80619	6.88663
NM_030955	ADAMTS12	Homo sapiens ADAM metallopeptidase with thrombospondin type 1 motif, 12 (ADAMTS12), mRNA.	1.61095	4.86e-13	7.99713e-09	5.17228	5.42433	5.19256	5.17265	5.63398	5.41385	5.15305	4.995	5.07118	5.55703	5.50223	4.22761	4.34135	4.01497	4.28838	4.14623	4.29783	4.07871	4.21957	4.19586	3.96305	3.92145	3.87972	4.32763	4.96356	4.35308	4.76937	3.7438	4.05714	3.40205	3.91298	3.87466	3.86707	3.83777	3.88465	3.83178	4.01093	3.88591	4.17178	3.75672	3.59957	3.75993	4.01797	3.6994
NM_016310	POLR3K	Homo sapiens polymerase (RNA) III (DNA directed) polypeptide K, 12.3 kDa (POLR3K), mRNA.	1.61066	6.66e-12	1.0959e-07	7.59522	7.68404	7.91438	7.6044	8.07453	7.62689	7.43408	7.10953	7.3889	8.84087	7.54453	7.18741	7.7571	7.50741	7.22115	7.80891	7.52783	7.90741	7.11562	7.50043	7.31417	7.43395	7.67809	7.13844	6.69192	6.95602	6.64576	6.16916	6.69737	6.13628	7.98587	6.89466	7.4363	7.29842	6.85197	6.95779	7.05226	6.99215	6.07431	6.19571	6.79012	6.1517	5.59026	5.9416
NM_018952	HOXB6	Homo sapiens homeobox B6 (HOXB6), mRNA.	1.61053	3.08e-08	0.000506814	4.69046	4.63779	4.79863	4.54396	4.68853	4.83683	5.06597	4.55623	4.68743	5.04224	5.17299	4.16593	4.06738	3.94205	4.01954	3.56448	4.40149	4.04153	3.81222	3.75596	3.63973	3.85891	3.70497	3.51068	4.24172	4.31327	3.06406	3.30316	2.82566	2.79302	3.40294	3.73331	3.08468	2.70829	3.14492	3.01799	3.03378	3.48702	2.84466	3.18838	2.79498	3.38337	3.39816	3.32227
NM_014264	PLK4	Homo sapiens polo-like kinase 4 (Drosophila) (PLK4), mRNA.	1.61043	3.39e-12	5.57825e-08	2.70977	3.01921	2.95493	2.66757	2.52529	2.55842	3.05991	2.89033	2.79889	2.94928	2.94664	1.82241	1.7545	1.6903	1.9681	1.86947	1.81818	1.944	1.71284	1.69778	1.73506	1.71634	1.61493	2.22515	1.77482	1.57417	1.64799	1.34161	1.39417	1.48728	1.25092	1.70567	1.54377	1.97821	1.57934	2.02992	1.54377	1.80985	1.62759	2.06337	1.68073	1.69455	1.80964	1.66066
NM_013252	CLEC5A	Homo sapiens C-type lectin domain family 5, member A (CLEC5A), mRNA.	1.60974	1.37e-07	0.00225434	5.29108	3.3929	4.21787	4.3673	4.3161	4.91791	4.4164	4.81643	2.97051	5.14285	3.7592	1.54398	3.29616	3.79151	3.24013	2.45895	4.07296	2.25263	2.52799	3.48232	3.04635	2.35237	3.11511	2.02067	3.64149	3.91285	3.71936	1.80157	3.47381	2.4179	4.30633	2.49264	3.301	2.33281	2.86415	3.0897	3.28417	2.69904	2.43372	2.60129	1.84468	3.51828	3.21049	3.31731
NM_005931	MICB	Homo sapiens MHC class I polypeptide-related sequence B (MICB), mRNA.	1.60967	1.46e-12	2.40243e-08	6.0124	6.10961	6.24125	6.02734	6.17066	5.98088	6.32354	5.73269	5.96815	6.35289	6.51781	4.44692	5.11145	4.83038	4.7975	4.87566	4.95791	4.6774	4.58238	4.56708	4.73887	4.82902	4.50096	4.53503	4.80059	4.8385	4.45109	4.25476	4.56269	4.36166	4.56228	5.32157	5.19434	5.45312	5.23674	5.36384	5.43408	5.15857	4.55793	5.11863	4.91785	4.96177	4.15836	4.9515
NM_012255	XRN2	Homo sapiens 5'-3' exoribonuclease 2 (XRN2), mRNA.	1.60825	6.05e-17	9.95528e-13	6.77561	7.53989	7.16184	7.05486	7.04466	7.606	7.41836	5.34757	6.80499	7.16973	5.99036	5.5837	5.60782	5.15959	5.79691	5.90962	5.88941	5.70839	5.7474	5.68127	5.85192	5.89047	5.75597	5.88759	6.12148	4.47874	6.35902	5.64891	6.08405	5.76742	5.27785	5.23293	6.11542	6.54691	5.78233	6.71696	6.79756	6.45812	6.07221	6.18424	6.06173	5.52649	5.78861	5.01043
NM_012341	GTPBP4	Homo sapiens GTP binding protein 4 (GTPBP4), mRNA.	1.60767	1.23e-14	2.02396e-10	6.73291	6.82065	6.56378	6.56459	7.21768	6.87775	6.9637	5.82275	6.53611	7.76077	6.15116	5.55166	5.5474	5.34079	5.73896	5.43977	6.22611	5.6334	5.62863	5.84088	5.77953	5.94565	6.34105	5.62809	5.98618	4.42926	6.47075	5.9349	5.84638	5.41223	5.55154	5.53568	6.49561	6.26367	5.9015	6.45659	6.39536	6.4621	6.17141	5.89331	5.99901	5.20951	5.4327	5.13033
NM_005983	SKP2	Homo sapiens S-phase kinase-associated protein 2 (p45) (SKP2), transcript variant 1, mRNA.	1.6067	6.18e-13	1.01692e-08	5.87029	6.73702	6.13474	6.18852	6.16972	5.93546	6.58592	4.99914	5.8798	5.02696	6.0594	4.98266	5.23884	4.84884	5.14677	5.41957	5.23896	5.18675	4.51267	4.87318	5.13127	5.07044	4.26263	5.44747	5.44032	4.29092	5.52072	4.15953	5.13078	4.56549	4.43801	4.10475	4.98186	5.61923	5.68198	5.7989	5.74656	5.80654	5.18224	5.37077	5.10103	4.9101	5.36456	4.66291
NM_144583	ATP6V1C2	Homo sapiens ATPase, H+ transporting, lysosomal 42kDa, V1 subunit C2 (ATP6V1C2), transcript variant 2, mRNA.	1.60662	4.29e-09	7.0592e-05	3.56863	3.42501	3.76793	3.80263	3.84109	3.34911	3.91272	3.80041	3.7408	4.13751	3.66815	2.58147	2.46924	2.4509	2.325	2.20099	2.48476	2.37244	2.73303	2.54348	2.41661	2.25341	2.63234	2.3583	2.34639	2.40404	2.53217	1.77685	1.99948	2.66393	2.42924	2.6588	2.34004	2.44761	1.93238	2.18102	2.21837	2.41316	2.41191	2.17373	2.18961	2.14637	2.31893	2.17518
NM_015419	MXRA5	Homo sapiens matrix-remodelling associated 5 (MXRA5), mRNA.	1.60608	3.84e-12	6.31872e-08	7.01226	6.72164	6.57329	6.60555	7.49109	6.95688	6.60361	5.97774	6.91789	6.96231	6.66282	5.93343	5.99113	5.76746	5.7884	6.1048	6.17515	5.93717	6.21749	5.61035	6.10178	5.45996	5.85649	5.3893	6.07276	4.39654	5.30063	4.64805	5.53211	5.55063	4.72549	4.90467	5.70298	5.9047	5.62616	5.64714	6.10675	5.51463	4.9202	5.21157	5.58856	5.90899	5.06478	5.4121
NM_001096	ACLY	Homo sapiens ATP citrate lyase (ACLY), transcript variant 1, mRNA.	1.60517	6.24e-09	0.000102679	7.87992	8.06025	7.667	7.98239	8.08159	7.88025	7.78359	6.24796	7.7975	8.27044	6.91016	6.91572	7.47748	6.61147	6.83957	6.85497	6.96625	7.52597	7.06364	6.94706	6.95611	6.67585	6.98256	6.99366	7.05881	5.42424	7.28852	5.83317	7.86061	6.48542	6.43144	6.34125	7.21341	7.59677	7.13954	7.64997	7.86495	7.65729	7.21121	6.80645	7.12905	7.38932	6.43036	6.75327
NM_033109	PNPT1	Homo sapiens polyribonucleotide nucleotidyltransferase 1 (PNPT1), mRNA.	1.60512	1.56e-10	2.56698e-06	5.893	6.64298	6.15803	5.79002	6.59079	6.55434	6.06951	4.90047	6.46731	7.14717	5.62792	4.3745	4.35525	4.84007	5.03609	4.11938	5.7956	4.51943	4.14411	4.94128	4.92822	5.22469	5.08398	5.59566	5.09837	3.24706	5.35465	5.30404	5.21429	5.06601	4.84487	4.54053	5.73989	6.04517	5.6364	5.70427	5.41669	5.83387	5.17506	5.85104	5.5836	4.71188	4.05286	4.02369
NM_016077	PTRH2	Homo sapiens peptidyl-tRNA hydrolase 2 (PTRH2), nuclear gene encoding mitochondrial protein, mRNA.	1.60508	3.09e-10	5.0846e-06	4.73547	4.94227	4.95866	4.68929	5.5522	4.8105	5.09381	4.26722	5.08516	7.14692	5.30976	3.85001	4.85551	4.23068	4.58623	5.17953	4.83622	4.85766	4.79312	5.01781	4.71807	4.46379	5.69702	4.18858	4.33336	2.81339	4.38588	4.54416	3.76576	4.29904	4.75953	4.08053	4.31486	3.88823	2.84685	4.08862	4.41525	4.08756	3.11923	4.68119	4.66581	2.86452	4.0407	3.56872
NM_007027	TOPBP1	Homo sapiens topoisomerase (DNA) II binding protein 1 (TOPBP1), mRNA.	1.60419	7.01e-15	1.1535e-10	5.70126	6.56881	6.08751	5.88172	5.97053	5.92168	6.07817	4.58415	6.21788	6.20063	6.03406	4.7039	4.6555	4.48026	5.06602	5.05612	5.04946	4.6895	4.33106	4.70525	4.86125	5.02647	4.5733	5.26031	5.26919	3.36744	5.68148	4.6592	4.98584	5.37105	4.7935	4.62546	5.23836	5.85003	5.48603	5.58908	5.54895	5.38536	5.33449	6.01951	5.7927	4.84605	5.0151	4.55794
NM_006665	HPSE	Homo sapiens heparanase (HPSE), mRNA.	1.60407	7.13e-16	1.17324e-11	4.27835	4.08072	4.43568	3.9634	4.23055	3.93851	4.03167	4.09929	4.16099	4.70401	4.84847	3.18963	3.15252	3.25749	3.21155	3.08512	3.19997	3.03725	2.99941	3.09755	3.02333	3.04458	3.14891	3.27994	3.25036	3.08802	2.9921	2.80252	2.90626	2.83796	2.86909	2.805	3.14401	3.79193	3.34147	3.3968	3.32959	3.11372	3.11543	3.60413	3.31987	3.224	3.1111	3.29144
NM_002087	GRN	Homo sapiens granulin (GRN), mRNA.	1.60323	1.14e-10	1.87587e-06	9.47294	9.84077	9.97696	9.90217	9.98664	9.73554	9.84379	8.23634	8.67246	9.7388	7.96489	8.78153	9.57207	8.8341	8.84558	8.92689	8.44226	9.66223	9.16157	8.70342	8.73117	8.55991	8.51418	8.49652	8.41787	6.01584	8.63143	7.59881	8.95612	8.76952	8.70165	8.25122	8.83387	9.71784	8.81545	9.53026	10.1348	9.33821	8.13957	8.62753	9.04054	9.04531	8.28729	8.70731
NM_002789	PSMA4	Homo sapiens proteasome (prosome, macropain) subunit, alpha type, 4 (PSMA4), mRNA.	1.60314	9.97e-10	1.64056e-05	8.55433	9.17788	9.06576	8.41197	9.50396	8.67023	8.70987	6.64058	8.01126	10.104	6.97227	7.90207	8.40612	8.0281	8.44227	9.33944	8.89603	8.6193	7.87238	8.60675	8.86021	8.20754	9.19517	8.77772	7.26177	3.38007	8.0974	7.15443	8.33033	7.95219	8.48209	7.48156	8.27101	8.2332	7.05835	8.32291	8.37341	8.47551	7.04297	8.60026	9.04995	7.45458	7.21316	7.09791
NM_152515	CKAP2L	Homo sapiens cytoskeleton associated protein 2-like (CKAP2L), mRNA.	1.60255	5.67e-14	9.32998e-10	4.04639	4.02791	3.77295	3.86051	3.28147	3.58606	3.8388	3.98247	3.9911	3.74674	4.46138	2.8423	2.49051	2.67289	2.52799	2.74678	2.94838	2.78477	2.25059	2.68416	2.17594	2.34468	2.45629	2.22787	2.38872	2.44273	2.18479	2.21295	2.20828	2.10822	2.28752	2.55309	2.92536	2.91393	2.7066	2.55343	2.73689	2.66607	2.48921	2.65584	3.17389	2.74803	2.65584	2.68855
NM_001008883	CCT3	Homo sapiens chaperonin containing TCP1, subunit 3 (gamma) (CCT3), transcript variant 2, mRNA.	1.60243	8.45e-15	1.39045e-10	7.46149	8.40103	7.90864	7.38105	7.78303	7.88446	7.5048	6.72333	7.45628	7.79402	6.88449	6.46317	7.09856	6.81925	6.85017	6.71556	7.48779	7.3509	6.56388	6.93323	6.91759	6.49299	7.11588	6.91699	6.61153	4.51701	7.07053	6.53742	6.41599	6.76286	6.95596	6.27103	7.18662	7.22499	6.46942	6.90032	6.93563	7.11907	6.90283	7.27829	7.2075	7.17946	6.9046	6.49321
NM_015434	INTS7	Homo sapiens integrator complex subunit 7 (INTS7), mRNA.	1.60242	2.39e-15	3.93275e-11	4.73625	5.8744	5.36188	4.96917	5.04165	4.99635	5.05073	3.6923	4.9025	5.22053	4.41775	3.42589	3.48102	3.57712	3.90347	3.57708	3.79995	3.4914	3.26124	3.50578	3.66668	3.64184	3.52691	4.25879	3.62577	2.84372	3.6165	3.26383	3.63452	3.41862	3.27221	3.17247	4.11355	4.69791	4.21816	4.33653	4.27591	4.24106	4.15068	4.74739	4.24823	3.33957	3.06757	3.10476
NM_006516	SLC2A1	Homo sapiens solute carrier family 2 (facilitated glucose transporter), member 1 (SLC2A1), mRNA.	1.60135	8.26e-12	1.35918e-07	7.72687	7.564	7.8637	7.54561	7.2807	7.53147	7.70246	6.92998	7.00161	8.09017	7.41366	6.5004	6.95732	6.50114	6.52705	7.12394	7.24477	6.99483	6.23053	6.49168	6.49989	6.08092	6.43752	5.90656	6.27543	6.51358	6.86722	5.67292	6.46587	6.13765	6.40573	6.29944	6.84184	7.56451	6.32328	7.40697	7.79397	7.45264	6.24162	6.86939	6.97882	6.20603	6.81861	6.91746
NM_000057	BLM	Homo sapiens Bloom syndrome (BLM), mRNA.	1.60135	1.41e-15	2.32016e-11	3.5568	3.81073	3.87873	3.68813	3.58792	3.72585	3.87461	3.43869	3.71421	3.69775	3.57066	2.33548	2.5531	2.33811	2.30996	2.80355	2.71007	2.5951	2.13946	1.9129	2.34745	2.00189	2.16155	2.24092	2.18272	1.95274	2.1134	1.95741	1.97985	2.29225	1.89892	1.93063	2.84093	2.75753	2.74622	3.00049	2.77149	2.63314	2.48787	3.10608	2.83468	2.54555	2.95606	2.54555
NM_005319	HIST1H1C	Homo sapiens histone cluster 1, H1c (HIST1H1C), mRNA.	1.60129	7.28e-14	1.19792e-09	7.62286	8.34024	7.83549	8.03054	7.76641	7.37752	8.42053	7.35479	7.5644	7.54725	7.95864	7.17573	7.21028	6.65489	7.20851	6.81931	7.21038	7.11129	7.22613	6.633	7.60849	6.93015	6.68134	6.59125	6.119	3.96716	6.94321	6.88751	6.39633	7.26266	7.13284	6.72608	7.70677	7.84749	7.19711	7.31358	7.25422	7.0199	6.84584	7.00072	7.51787	7.40824	6.31396	6.58315
NM_005765	ATP6AP2	Homo sapiens ATPase, H+ transporting, lysosomal accessory protein 2 (ATP6AP2), mRNA.	1.60124	8.18e-14	1.34602e-09	7.67981	8.34106	8.34058	8.20935	9.4716	8.56034	8.24915	6.72759	7.67721	9.01982	7.1243	7.01828	7.27828	7.47167	6.99162	7.22614	7.8866	7.43744	6.94283	7.87162	7.2944	6.96927	7.59532	7.19856	7.25436	5.14088	7.13875	7.24794	7.2916	7.29989	7.46479	7.25264	7.99733	7.52654	6.94788	7.39007	7.996	7.4574	6.94818	7.871	7.98208	7.48211	6.97461	6.58127
NM_000043	FAS	Homo sapiens Fas (TNF receptor superfamily, member 6) (FAS), transcript variant 1, mRNA.	1.6011	5.02e-12	8.26041e-08	5.48432	6.48402	5.98477	6.02978	6.50011	5.71681	6.01656	4.99501	5.20455	5.88683	6.17851	5.10874	5.48029	4.29584	5.0208	5.53807	5.81599	5.47147	4.71279	4.95119	5.07702	4.80372	5.03133	5.71352	5.4477	4.59843	6.03363	5.17616	5.25732	4.68809	4.94047	4.32761	5.58525	5.6988	5.31465	5.57702	6.2187	5.11355	5.94305	5.20338	5.32723	4.71507	3.94446	4.50826
NM_019591	ZNF26	Homo sapiens zinc finger protein 26 (ZNF26), mRNA.	1.59965	2.35e-19	3.86693e-15	3.81932	4.54599	4.25368	4.29058	3.98154	4.25953	4.31236	3.54267	4.31468	4.4334	4.9129	2.83192	2.96198	2.49217	3.08418	3.31015	2.95184	2.86895	2.8237	2.2658	2.91158	2.84486	2.67969	2.90881	2.70607	2.43075	2.82987	2.65104	2.38042	1.84445	2.30056	2.93966	3.27598	3.37817	3.17384	3.425	3.53734	3.35828	3.878	2.94972	3.29693	2.18758	2.84242	2.4379
NM_015932	POMP	Homo sapiens proteasome maturation protein (POMP), mRNA.	1.59963	4.29e-13	7.05919e-09	7.5249	7.64429	7.86854	7.49058	8.23226	7.58133	7.79784	7.24672	7.35675	8.76944	6.4577	6.56497	7.1366	6.96539	7.03316	6.85045	7.43926	7.20353	6.58516	7.15299	6.79218	6.66947	7.39693	6.851	6.46945	4.14176	7.23169	7.01287	6.9144	7.87085	7.94369	6.7589	7.18636	6.97086	6.21441	6.77553	6.82611	6.98053	5.90904	6.97846	7.24475	6.58294	6.12245	5.64762
NM_144710	2014-09-10	Homo sapiens septin 10 (SEPT10), transcript variant 1, mRNA.	1.59869	6.63e-10	1.09097e-05	5.50458	6.54062	5.91179	5.49202	6.91846	6.41646	6.02399	4.7491	5.81698	6.00465	5.04863	4.31799	4.2478	4.17003	4.60458	4.27781	4.61827	4.29038	3.90423	3.38655	3.18216	4.28262	3.09437	3.82386	4.17372	2.00634	4.8627	5.3023	4.8468	4.84664	4.2607	5.06342	5.44423	5.9303	5.59993	6.298	6.43002	5.88009	6.33985	4.6817	4.64723	3.94445	3.6185	3.3782
NM_016931	NOX4	Homo sapiens NADPH oxidase 4 (NOX4), mRNA.	1.59866	2.13e-08	0.000350491	4.84637	5.25311	4.70676	4.6585	5.66613	5.61276	4.83075	4.7052	4.37869	5.2754	4.42073	4.29321	4.23233	3.79441	4.13793	4.13067	4.53261	4.16953	3.91267	3.70421	3.42852	3.56507	3.66723	4.17293	4.61537	3.24725	3.19773	3.18151	3.04737	2.90451	3.27092	3.61359	3.495	2.92094	2.85357	3.19754	3.21636	3.3689	2.91127	3.2245	3.1581	3.39118	3.26578	3.16046
NM_002118	HLA-DMB	Homo sapiens major histocompatibility complex, class II, DM beta (HLA-DMB), mRNA.	1.5986	2.26e-08	0.000371883	6.94023	7.82733	7.79218	6.43783	7.91166	5.75257	7.60176	5.29346	5.1663	7.26034	6.11588	6.04395	6.88727	5.8166	6.45175	7.65505	7.60631	6.84429	6.02801	7.32794	7.69362	6.63075	6.74622	7.69882	7.52395	3.35193	5.62411	5.62714	5.91671	6.337	6.07674	6.25567	6.34013	7.78688	5.50314	6.54447	6.55668	5.83491	5.50915	7.28947	7.56638	6.59656	4.95316	6.24853
NM_024531	GPR172A	Homo sapiens G protein-coupled receptor 172A (GPR172A), mRNA.	1.59849	6.64e-17	1.09261e-12	7.27326	7.0405	7.18366	7.17601	7.13238	6.98638	7.20453	7.22364	6.93096	7.94537	7.86163	6.72507	7.2252	6.77653	6.59256	6.58384	6.81988	7.3624	6.16548	6.36396	6.07129	6.3202	6.19824	6.16451	6.15159	6.03242	6.62605	6.17952	6.27564	6.14657	6.26432	6.30048	6.72405	7.10229	6.73743	6.97019	6.84519	6.77137	6.29093	6.25739	6.4188	6.35372	6.3752	6.49281
ENST00000319285	XTP3TPA	XTP3-transactivated protein A (XTP3TPA), mRNA gene:ENSG00000179958	1.59756	3.79e-14	6.23645e-10	9.17553	9.0923	9.21882	9.18513	8.71548	8.56908	9.22035	7.50073	8.44305	8.98994	7.35766	8.60503	8.30154	8.62685	8.76277	8.59992	8.01865	8.50567	8.49483	8.53677	8.76299	8.44981	8.21429	8.36387	7.7138	6.26776	8.16541	6.36336	8.30151	6.9657	7.27759	6.95746	7.60961	8.94938	8.07092	9.02469	9.02011	9.03821	7.36802	8.22824	8.33359	7.59552	6.96929	7.43906
NM_016649	ESF1	Homo sapiens ESF1, nucleolar pre-rRNA processing protein, homolog (S. cerevisiae) (ESF1), mRNA.	1.59729	4.11e-13	6.763e-09	4.53556	5.74636	5.11577	4.64745	5.28043	5.49504	5.32008	4.25835	4.87166	5.83853	4.83672	3.47707	3.72592	3.53504	3.90628	3.79199	4.65452	3.68725	3.50045	3.4826	3.69048	3.72715	4.08601	4.10782	4.27201	2.44218	3.89417	4.21532	3.73928	4.01267	3.37784	3.60575	3.92286	4.04532	3.81289	4.41817	4.34961	4.13117	3.99811	3.68196	3.56426	3.33474	2.63878	2.73169
NM_022170	EIF4H	Homo sapiens eukaryotic translation initiation factor 4H (EIF4H), transcript variant 1, mRNA.	1.59728	2.38e-10	3.91629e-06	7.79233	7.30962	6.87628	6.6111	7.16412	7.87623	6.65197	6.75112	7.88897	7.19354	6.73927	7.04976	6.75023	5.42	6.33775	5.37971	7.21358	5.95669	6.43835	6.59413	5.79568	6.64536	5.5866	5.82429	7.05992	4.50312	7.37408	5.9252	5.25758	3.67525	6.02747	5.81617	6.73182	7.26932	6.50145	7.32181	6.88485	6.96937	6.97405	6.02105	6.91987	6.32512	5.31302	5.2312
NM_001957	EDNRA	Homo sapiens endothelin receptor type A (EDNRA), mRNA.	1.59711	1.44e-09	2.36952e-05	6.0595	7.62612	6.31719	5.36329	6.97351	7.04939	7.04696	5.2662	5.4114	5.95391	6.48923	5.36593	4.43078	4.99125	5.80982	4.90128	6.40499	4.68718	4.75906	5.20862	4.55656	5.74732	4.33775	4.80732	4.92191	3.762	5.72884	5.79666	5.04057	4.528	5.25884	4.44893	5.36203	5.09394	4.63522	5.71487	6.11012	5.40992	5.02287	4.9541	4.87818	4.54929	4.54929	3.76953
NM_021873	CDC25B	Homo sapiens cell division cycle 25 homolog B (S. pombe) (CDC25B), transcript variant 1, mRNA.	1.5969	1.75e-14	2.87962e-10	6.62413	6.92679	6.57323	6.29017	6.70778	6.43861	6.7568	6.3224	6.01383	6.46162	6.68595	5.65177	6.4611	5.47785	5.61435	5.83849	6.17256	6.5376	5.72028	5.55831	5.42847	5.32041	5.48365	5.3738	5.80526	5.33325	5.57669	5.19262	5.33693	5.25749	5.73233	4.96802	5.5002	5.81217	5.34158	5.77557	5.79952	5.96019	5.93085	5.63711	5.81894	5.71358	6.50373	5.51329
NM_024068	OBFC2B	Homo sapiens oligonucleotide/oligosaccharide-binding fold containing 2B (OBFC2B), mRNA.	1.596	4.6e-14	7.5693e-10	7.71868	8.06355	7.62279	7.75251	8.41171	7.78781	7.80865	7.42295	7.37261	8.67643	6.87259	6.95525	7.51124	6.52299	7.05071	7.5714	6.95051	7.64638	7.19845	7.17586	6.81978	7.02681	7.07374	6.98647	6.79823	6.21481	6.85364	6.7712	6.83004	7.33665	7.19468	7.29156	7.71058	7.08749	6.6833	7.416	7.4249	7.4115	6.53063	6.97312	7.06673	6.97072	6.65135	7.03691
NM_006739	MCM5	Homo sapiens minichromosome maintenance complex component 5 (MCM5), mRNA.	1.59545	1.41e-17	2.32015e-13	6.44903	6.79087	6.61392	6.49496	6.37722	6.49819	6.69141	5.44757	5.74164	6.50415	6.3305	5.74568	6.35557	5.42028	5.76227	5.79822	5.8108	6.385	5.56262	5.50783	5.55441	5.21059	4.93935	5.122	5.06841	4.15139	5.34212	4.47032	5.21895	5.19386	5.24876	5.10347	5.8152	6.23254	5.60645	6.56087	6.4549	6.43778	5.54946	5.50816	5.88222	5.71552	5.75177	5.69158
NM_004347	CASP5	Homo sapiens caspase 5, apoptosis-related cysteine peptidase (CASP5), mRNA.	1.59534	4.03e-07	0.00663137	3.91179	3.98886	3.92954	4.34183	4.3095	3.60191	4.35298	3.63425	3.71099	3.93685	3.10487	2.85621	4.80806	2.93865	2.81439	3.30885	3.38661	4.86566	2.52099	2.64627	2.92578	2.33043	3.04498	3.01168	2.50251	2.20401	2.3021	2.40016	2.3069	2.8391	2.89939	2.5028	2.14068	2.22181	1.97102	2.09047	2.18326	2.07229	2.3003	2.19582	2.6559	4.10518	3.25223	2.44177
NM_021103	TMSB10	Homo sapiens thymosin, beta 10 (TMSB10), mRNA.	1.59527	8.56e-12	1.40855e-07	10.4984	10.3445	10.6532	10.1822	11.2743	10.2546	10.0655	9.70903	8.86453	10.4898	8.85135	8.90018	10.5721	9.08171	9.50311	9.31474	9.91589	10.9237	9.50709	9.5971	9.13222	8.78499	9.51169	9.51431	8.92467	8.07062	8.91965	8.7138	8.3928	9.23116	9.96898	9.07953	9.2822	9.87135	8.98764	9.39958	9.37098	9.14337	8.09078	9.41101	9.71156	9.94577	8.50183	9.23924
NM_001776	ENTPD1	Homo sapiens ectonucleoside triphosphate diphosphohydrolase 1 (ENTPD1), transcript variant 1, mRNA.	1.59523	1.31e-11	2.1556e-07	6.57999	7.63146	7.17264	6.6788	7.63056	7.49736	7.29668	5.24299	5.90499	6.40744	6.42552	4.94296	4.87737	4.67667	5.17113	6.03902	5.88023	5.21841	5.02788	5.34143	5.41843	4.91707	5.66437	5.83372	5.2188	3.56867	5.76473	4.91463	6.06894	4.85077	5.39777	4.82125	5.49294	5.68882	5.2223	5.82813	6.25801	5.51979	6.48175	6.26972	6.05043	5.22748	4.97855	4.89736
NM_002593	PCOLCE	Homo sapiens procollagen C-endopeptidase enhancer (PCOLCE), mRNA.	1.59502	2.98e-07	0.00490359	7.72211	8.30748	7.90718	7.84711	9.33615	8.18775	7.89329	7.05305	7.31465	7.99492	7.30285	7.82671	7.40835	6.80382	7.86739	7.28613	7.83949	7.64073	8.18341	7.59517	6.5103	7.72166	7.3871	7.36844	7.58265	5.8381	7.13954	7.15686	7.31648	6.77481	7.54129	6.91124	6.85545	7.27545	7.16359	7.29636	8.12481	7.53086	7.21336	6.28272	6.9171	6.46306	6.76159	6.86391
NM_002287	LAIR1	Homo sapiens leukocyte-associated immunoglobulin-like receptor 1 (LAIR1), transcript variant a, mRNA.	1.59496	1.09e-10	1.79359e-06	6.25955	6.88313	6.7797	6.67411	7.43615	6.48372	6.7979	5.51873	5.70393	6.35875	5.71251	6.06706	6.33105	5.54918	6.10689	6.82964	6.90669	6.34927	5.9981	5.74996	6.25536	5.75514	5.88399	6.32459	5.80116	3.80456	5.92199	5.03543	5.89166	6.16873	5.73052	5.67868	6.06706	6.50034	5.10991	6.18198	6.38788	5.97662	5.17681	6.08135	6.35417	6.02833	4.77963	5.80344
NM_002090	CXCL3	Homo sapiens chemokine (C-X-C motif) ligand 3 (CXCL3), mRNA.	1.59475	7.03e-08	0.00115679	5.96497	6.13368	5.99056	5.44593	5.81247	5.36247	6.1671	5.74595	5.50505	6.37868	5.19656	3.96904	4.36327	3.23702	3.7813	4.14086	4.74867	4.83526	3.6863	3.91469	3.65828	3.35703	4.53054	4.52273	3.9848	3.59304	4.92835	4.3608	4.59864	5.44867	4.28919	4.04398	4.86599	4.8804	4.45905	4.70198	4.52189	4.28629	4.5427	3.99181	4.68767	3.25389	3.78807	4.44735
NM_002799	PSMB7	Homo sapiens proteasome (prosome, macropain) subunit, beta type, 7 (PSMB7), mRNA.	1.594	9.59e-11	1.57803e-06	8.51357	8.75829	8.83246	8.67986	8.68477	8.59339	8.66527	7.17494	8.78786	9.34622	7.27055	8.58588	8.45238	8.38688	8.62711	8.38302	8.51288	8.5144	8.6451	8.31085	8.19173	8.15795	8.41653	8.00081	7.43116	4.80134	8.01117	6.86248	8.05887	7.44671	8.37574	7.56187	8.28126	8.65143	7.85099	8.52583	8.56346	8.77597	7.18724	8.02596	8.7142	7.56836	7.16195	6.96651
NM_012415	RAD54B	Homo sapiens RAD54 homolog B (S. cerevisiae) (RAD54B), mRNA.	1.59338	1.82e-14	2.99481e-10	3.92039	4.01689	4.15	4.12753	3.7826	3.97858	4.0609	3.83593	4.09397	4.46554	4.95761	2.36234	2.3139	2.33664	2.45896	2.43463	2.32385	2.31124	2.47515	2.58005	2.64496	2.78025	2.66859	2.89237	2.66427	2.51684	2.53376	2.321	2.24281	2.58927	2.27668	2.68929	2.5518	2.41528	2.5498	2.70612	2.35943	2.53962	2.43225	2.56644	2.4747	2.21	2.71557	2.10871
NM_012129	CLDN12	Homo sapiens claudin 12 (CLDN12), mRNA.	1.59335	6.63e-09	0.000109097	7.4972	7.93988	8.00864	7.91356	7.47159	7.82383	7.49654	5.06808	7.38402	7.61523	6.22854	6.88783	7.42917	6.83134	7.00246	6.40956	5.7077	7.80609	6.31977	6.58584	6.58521	7.40743	6.51968	5.99597	5.61144	3.14858	6.71662	5.89795	7.33112	6.13776	5.99317	5.93587	6.80932	8.19922	6.22719	7.66508	7.75956	6.85285	5.96404	7.80812	8.22078	6.57485	6.37282	6.37485
NM_016937	POLA1	Homo sapiens polymerase (DNA directed), alpha 1 (POLA1), mRNA.	1.59303	4.83e-16	7.94776e-12	5.30925	5.98644	5.37361	5.58375	5.7114	5.83512	5.80219	4.28145	5.73441	5.57468	5.29101	4.11957	3.91098	4.04998	4.26792	4.1167	4.37698	3.85603	4.06498	3.99769	4.33789	4.354	4.08899	4.87751	4.98295	3.26595	4.55627	4.44269	4.77867	4.24245	3.7892	3.93278	4.86242	4.78874	4.53752	4.96395	4.82805	4.68171	4.85154	4.72624	4.67882	3.95858	3.95858	3.67849
NM_017425	SPA17	Homo sapiens sperm autoantigenic protein 17 (SPA17), mRNA.	1.59268	1.42e-12	2.33661e-08	3.76534	3.76456	3.82023	3.93875	4.23003	3.65326	3.96347	4.03439	3.70166	5.42635	3.85565	2.50147	3.18641	3.02177	3.04852	3.13672	3.07735	3.21497	2.7496	3.12451	2.73833	2.147	2.75636	2.68091	2.18177	1.60752	2.66507	2.34509	2.22608	2.46557	2.18037	3.35481	2.88844	2.52658	2.36705	2.44878	2.39211	2.54248	2.57703	3.58768	3.86907	2.3043	1.74894	2.06238
NM_017768	LRRC40	Homo sapiens leucine rich repeat containing 40 (LRRC40), mRNA.	1.59243	3.2e-10	5.2656e-06	4.86126	6.20511	5.5144	4.95374	5.15651	5.44935	5.56611	3.51255	5.30769	5.48761	4.38056	4.11112	3.00472	3.34115	4.37599	3.81178	3.39783	3.53002	3.49452	3.92272	4.17936	4.76196	3.97118	4.23311	3.93818	2.57393	4.93557	3.81467	4.43307	3.77099	3.51559	3.20959	4.12317	4.83414	4.12086	4.93098	5.17528	4.76454	4.59798	4.90384	4.74289	3.57377	3.1875	2.27457
NM_138287	DTX3L	Homo sapiens deltex 3-like (Drosophila) (DTX3L), mRNA.	1.59231	3.06e-11	5.03523e-07	6.51754	7.60598	7.38489	7.08108	7.62613	7.13998	7.45091	4.92295	6.37926	7.48427	5.61198	5.34011	5.98644	5.92166	6.08813	5.72518	6.04689	5.78786	4.78824	5.70586	6.08713	5.99914	6.09397	6.44838	6.51191	3.04447	6.51896	5.32856	5.98372	6.04686	5.55794	5.77493	6.3102	7.06562	6.12817	6.5854	6.81587	6.58639	5.83577	6.44395	6.39236	5.309	4.56157	4.9354
NM_032865	TNS4	Homo sapiens tensin 4 (TNS4), mRNA.	1.59207	2.15e-06	0.0353782	5.29956	5.14793	4.86102	5.15919	4.89058	4.76342	5.02297	5.15148	5.07211	5.19453	5.17883	4.14837	4.77052	4.55284	4.60709	4.63697	4.65902	4.7136	3.78254	3.81313	4.20464	3.96602	3.66563	3.76493	3.76159	3.89214	3.83004	3.48283	3.87127	3.75418	3.83201	4.65033	3.91831	3.85227	3.93062	3.64983	4.08817	3.88311	4.15493	3.82825	4.3216	4.42487	4.34463	4.42495
NM_000574	CD55	Homo sapiens CD55 molecule, decay accelerating factor for complement (Cromer blood group) (CD55), mRNA.	1.59081	7.59e-09	0.000124893	8.16038	7.25297	7.01482	6.96239	7.59702	7.07473	7.16582	5.63864	6.72725	8.55878	5.77482	5.81739	6.46553	5.03798	5.69585	7.07249	7.43327	6.89029	5.72638	7.05012	6.3425	5.90039	7.90445	6.29537	7.39334	3.1766	7.09546	6.26445	6.38791	6.26449	5.99064	5.30989	6.25066	7.18994	6.26224	7.16406	6.8075	6.42437	6.85641	6.24254	6.78886	6.41937	5.30257	5.71112
NM_005566	LDHA	Homo sapiens lactate dehydrogenase A (LDHA), mRNA.	1.58974	1.46e-16	2.40243e-12	10.9893	10.9944	10.766	10.9271	11.3518	10.917	10.7064	9.5408	8.96018	11.0137	9.62411	9.88508	10.5971	10.1947	10.0205	10.3557	10.5043	10.8704	10.052	10.3383	9.67914	9.67784	10.1892	10.3607	10.1724	8.78455	10.3704	9.4697	10.3783	9.53773	10.6123	9.80605	10.1669	10.223	9.29444	10.6468	10.9437	10.7201	10.114	10.0112	10.1382	10.6937	8.95496	9.66544
NR_002219	EPR1	Homo sapiens effector cell peptidase receptor 1 (EPR1) on chromosome 17.	1.5892	2.68e-11	4.40994e-07	3.41919	3.77709	4.0333	3.68274	3.09723	3.59678	3.21434	4.22922	2.67903	3.40912	4.4526	2.32264	2.51874	2.89104	2.71826	2.60082	2.31801	2.84792	3.49948	2.12399	2.67064	2.7175	2.33999	2.25068	2.11677	2.89091	1.95713	2.3499	2.46981	2.36107	2.24782	2.65832	3.56463	3.53615	3.14041	2.96184	2.96874	3.18257	2.43644	2.75079	3.47958	3.22059	2.56363	2.8006
NM_015884	MBTPS2	Homo sapiens membrane-bound transcription factor peptidase, site 2 (MBTPS2), mRNA.	1.58902	1.8e-14	2.9619e-10	5.43593	5.75068	5.67151	5.61077	5.89426	5.81439	5.50139	4.2374	5.67773	5.64282	4.93062	4.48487	3.73023	4.41997	4.77108	3.80035	3.81137	3.97612	4.28364	4.37967	4.32187	4.52265	4.47088	4.49801	4.34127	3.25725	4.52664	4.08983	4.92831	3.88133	3.98816	3.80957	4.69962	5.09009	4.58149	5.11876	5.19988	4.94725	4.78201	4.61727	4.55455	3.78148	4.87043	3.4053
NM_144711	KLHL23	Homo sapiens kelch-like 23 (Drosophila) (KLHL23), mRNA.	1.58799	1.55e-07	0.00255053	3.34068	4.31298	4.39898	4.02197	4.06368	4.23295	3.8787	3.21967	4.14919	4.37943	3.38156	2.79284	3.66512	3.02656	3.04462	2.51152	2.87002	3.17997	1.95202	2.60588	2.90596	3.15914	2.69286	3.68978	2.71427	1.74734	2.30297	2.80953	2.55965	2.47975	1.80051	2.58652	3.08917	2.68782	2.65167	2.8818	2.53879	2.65262	3.05866	3.64288	3.24713	2.65987	1.83319	1.59894
NM_020183	ARNTL2	Homo sapiens aryl hydrocarbon receptor nuclear translocator-like 2 (ARNTL2), mRNA.	1.58752	3.07e-08	0.000505169	5.97686	5.66252	5.8247	5.68065	5.45682	5.52266	5.99239	5.05731	5.7504	6.36366	4.96151	3.70096	3.92656	4.56348	4.42719	4.13539	3.87724	4.07728	3.48877	4.07815	4.29269	4.30627	4.42453	4.01127	4.2907	3.13219	4.09692	4.10533	3.83898	4.55815	4.30302	3.96866	5.19398	5.28357	4.48247	5.39188	4.56312	4.95269	4.10828	5.07212	5.47338	4.14709	3.93422	4.0059
NM_000566	FCGR1A	Homo sapiens Fc fragment of IgG, high affinity Ia, receptor (CD64) (FCGR1A), mRNA.	1.58621	3.38e-07	0.00556179	4.57404	4.33484	5.151	3.56737	5.53503	4.47746	4.58265	4.57949	4.54208	4.99474	3.96102	2.88713	2.33703	3.09711	2.86802	3.03174	3.94617	2.68269	3.66165	4.08012	3.49782	2.99726	4.47081	4.51823	3.69342	3.2658	2.90156	2.84444	2.6008	2.44177	2.92957	2.60266	2.89411	3.3131	3.07914	3.58036	2.66449	3.24657	2.56891	3.59882	4.13099	3.64186	2.62478	3.09285
NM_000321	RB1	Homo sapiens retinoblastoma 1 (including osteosarcoma) (RB1), mRNA.	1.58601	4.93e-14	8.11231e-10	6.35978	7.02968	6.50774	6.69122	6.11178	6.7989	6.94836	4.94137	6.03229	5.97413	5.41234	4.96657	5.01262	4.87438	5.31211	5.28303	5.06233	5.22994	4.60074	4.70246	5.09654	4.84034	5.06414	4.66051	4.99834	3.62277	6.19313	5.3643	5.94424	5.39705	4.8955	5.03841	5.67403	6.26237	5.49302	6.89603	7.01292	6.22714	5.62329	5.79879	5.61251	4.92281	4.25738	4.2451
NM_018584	CAMK2N1	Homo sapiens calcium/calmodulin-dependent protein kinase II inhibitor 1 (CAMK2N1), mRNA.	1.58587	7.62e-11	1.25387e-06	7.71942	8.69299	7.94374	8.60022	9.08433	8.67114	8.24729	7.25073	7.63844	8.20665	7.3285	7.61829	8.73244	6.98941	7.829	7.19557	8.28941	8.74052	7.05259	7.42719	6.87043	7.63033	6.19738	8.01175	7.1557	6.36306	7.83512	8.10116	8.2576	6.73311	7.99631	6.41895	7.35656	6.61925	5.83098	7.24206	7.41706	7.73967	7.49558	6.94849	7.1262	8.68133	7.54369	6.53093
NM_002353	TACSTD2	Homo sapiens tumor-associated calcium signal transducer 2 (TACSTD2), mRNA.	1.58532	4.82e-07	0.00793131	6.52279	6.30073	6.82921	6.72184	5.55896	5.96887	6.348	5.75565	5.76114	7.68557	6.77341	5.35386	6.41603	5.7471	5.78767	6.06229	5.90944	6.52104	5.07198	6.07704	5.9762	5.14302	6.1992	5.56266	5.83001	5.51098	5.60991	4.80887	4.49525	5.15128	5.5985	5.29508	5.28294	6.79841	5.57156	6.74508	6.70295	6.0012	4.93902	6.93691	6.72074	5.82538	6.08457	6.52117
NM_001681	ATP2A2	Homo sapiens ATPase, Ca++ transporting, cardiac muscle, slow twitch 2 (ATP2A2), transcript variant 2, mRNA.	1.58529	2.3e-16	3.78465e-12	7.60208	7.90389	7.40866	7.67822	8.0216	7.77725	7.44845	6.26752	7.25963	8.01156	6.98681	6.21489	6.88317	6.37133	6.56201	6.87798	6.69573	6.98664	6.12655	6.53966	6.7713	6.5119	6.74917	6.52329	6.86978	4.54113	7.19856	6.60904	6.99549	6.4274	6.47538	6.52967	7.63587	7.19464	6.88511	7.56936	7.57977	7.1839	7.4472	7.18847	7.1733	7.00027	6.28759	6.32816
NM_032830	CIRH1A	Homo sapiens cirrhosis, autosomal recessive 1A (cirhin) (CIRH1A), mRNA.	1.58475	2.14e-12	3.52137e-08	7.68231	8.60129	7.75618	7.81678	7.62329	8.30218	7.99259	5.65912	7.31228	7.92677	6.18449	6.0988	5.59446	5.92042	6.41647	6.2427	6.04901	5.82003	6.23733	6.2352	6.10349	6.20193	6.14301	5.86328	6.49408	4.20078	6.88236	5.11201	6.47593	5.62129	5.80768	5.44753	6.71762	7.20417	6.12489	7.37589	7.46655	7.32679	6.9364	5.90282	5.96242	5.32469	5.29109	4.86474
NM_019111	HLA-DRA	Homo sapiens major histocompatibility complex, class II, DR alpha (HLA-DRA), mRNA.	1.58408	5.02e-07	0.00826041	10.2138	11.0269	11.3161	9.63579	11.4574	9.63587	10.4163	8.29132	8.32023	10.3059	8.77425	8.76994	9.96368	9.16724	9.80235	10.5953	10.6788	10.2289	8.93064	10.1361	10.0211	9.42248	9.83394	10.3641	8.98184	4.69121	9.48158	7.80932	9.04736	10.7237	9.63267	9.36984	9.30714	10.5822	8.89423	9.76121	10.1427	8.65977	8.68486	10.2888	10.4047	10.1872	7.74746	9.22131
NM_001018159	APPBP1	Homo sapiens amyloid beta precursor protein binding protein 1 (APPBP1), transcript variant 2, mRNA.	1.58389	3.7e-13	6.08835e-09	5.82233	6.78891	6.55032	6.54181	7.25695	6.93433	6.74818	4.73015	6.33122	7.31222	5.13741	5.33548	5.05438	5.57432	5.77301	5.2729	6.01026	5.33095	4.9484	6.00286	4.96359	5.88442	5.88475	5.6261	5.4339	4.11737	5.0943	5.23346	5.48266	5.59346	5.14422	5.40939	6.02274	5.93016	4.96543	5.73092	5.59611	5.77235	5.15552	6.51279	6.3411	5.04001	4.64794	4.19579
NR_003009	SCARNA8	Homo sapiens small Cajal body-specific RNA 8 (SCARNA8) on chromosome 9.	1.58367	3.95e-14	6.49972e-10	4.90269	5.50617	5.34007	5.62841	5.77949	5.54063	5.61285	4.32758	5.61927	5.2159	4.31427	3.74849	3.77371	3.88869	3.81693	4.597	4.30294	3.747	4.08467	3.75274	4.31353	4.1578	4.57457	4.57659	4.38722	3.15543	4.61188	4.18069	4.63544	4.65822	3.93886	3.79328	4.85257	4.34108	3.91761	4.73689	4.50524	4.50846	3.95941	4.97162	4.47196	3.78036	3.70295	3.77677
NM_001030006	AP2B1	Homo sapiens adaptor-related protein complex 2, beta 1 subunit (AP2B1), transcript variant 1, mRNA.	1.58255	2.11e-14	3.47201e-10	8.15175	8.40376	8.17485	8.23059	8.21042	8.34419	8.3625	6.41918	7.74017	8.10273	7.12201	6.13242	6.22081	6.44337	6.59049	6.71792	6.34587	6.2394	6.82827	6.89401	6.98832	6.56603	6.77281	6.95312	7.42734	5.03888	7.12498	6.17549	6.85168	6.57944	6.51014	6.33465	7.38114	7.69337	7.28321	8.07181	8.12176	7.59054	6.90659	7.13736	6.87972	6.8784	5.7449	6.25942
NM_002027	FNTA	Homo sapiens farnesyltransferase, CAAX box, alpha (FNTA), transcript variant 1, mRNA.	1.58229	9.06e-11	1.49082e-06	5.67828	6.61293	6.39918	5.98082	6.81634	6.45897	6.16407	4.7362	6.51073	7.41231	6.3674	5.2063	4.82076	5.09958	5.6961	5.92045	6.07646	4.84796	4.7047	5.64231	5.40526	5.89808	5.98503	6.02851	5.13369	0.911383	5.12917	4.46277	5.12549	5.79937	5.31166	5.6289	6.43935	5.89858	5.56669	6.28789	5.97401	5.73703	5.55265	6.63095	6.29174	4.73318	4.58738	4.66766
NM_004044	ATIC	Homo sapiens 5-aminoimidazole-4-carboxamide ribonucleotide formyltransferase/IMP cyclohydrolase (ATIC), mRNA.	1.58172	2.16e-15	3.55428e-11	6.17862	7.21353	6.89649	6.40896	6.96442	6.57564	6.67243	5.8521	6.62134	6.85815	5.75215	5.72043	6.11363	5.97739	5.67116	5.81001	6.22386	6.27579	5.56273	5.78438	5.47266	5.72985	5.47228	5.45724	5.67968	4.32686	5.92812	5.29235	5.66642	5.56883	5.56418	5.71127	6.55195	6.27825	5.59533	6.52688	6.21592	6.1722	5.57949	6.82127	6.56644	6.26372	5.95985	5.32136
NM_018243	2014-09-11	Homo sapiens septin 11 (SEPT11), mRNA.	1.58158	3.19e-12	5.24915e-08	7.79556	8.46693	8.09814	8.21017	8.80611	8.52413	8.3052	6.75383	8.00361	8.19118	7.74819	7.0704	6.87072	6.64607	7.27857	7.20709	7.58441	6.79646	7.09042	6.42022	7.43133	7.28522	7.23015	7.84559	7.74417	4.60236	7.86454	7.07075	7.1208	6.78965	6.506	6.71365	7.35131	7.6087	7.25468	7.40137	7.9939	7.46509	7.03834	7.7558	7.40888	6.9575	6.16406	6.36689
NM_003142	SSB	Homo sapiens Sjogren syndrome antigen B (autoantigen La) (SSB), mRNA.	1.58138	6.88e-11	1.1321e-06	8.51723	9.64959	8.87988	8.44829	9.18715	8.72055	8.74606	6.36071	8.36011	8.60513	7.68094	8.22818	8.60052	7.79408	8.15315	8.87951	9.60084	8.94701	8.77911	8.18879	8.3273	7.57995	8.37118	8.11419	7.68758	6.67679	8.02698	7.40481	7.78867	7.81241	8.84859	7.40487	8.37358	8.57588	7.62199	8.28623	9.06781	8.83763	7.74262	8.46538	8.75832	8.34263	7.75172	7.89222
NM_031480	RIOK1	Homo sapiens RIO kinase 1 (yeast) (RIOK1), transcript variant 1, mRNA.	1.58077	2.46e-12	4.04793e-08	5.30993	6.41369	5.64478	5.40158	5.62008	5.75157	5.51425	4.60509	4.98338	5.94931	5.08953	4.02745	4.0254	3.99904	4.47797	4.12852	5.31662	4.27424	4.10187	4.39116	4.14136	4.5741	4.02411	4.72487	3.89031	3.04502	4.597	4.0573	4.22432	3.62572	3.62735	4.01451	4.05486	4.75499	4.11735	4.58734	4.62656	4.66341	4.37687	4.70305	4.45739	3.8038	3.77849	3.58492
NM_000397	CYBB	Homo sapiens cytochrome b-245, beta polypeptide (chronic granulomatous disease) (CYBB), mRNA.	1.58076	1.33e-08	0.000218852	8.22945	8.96565	9.25677	8.09165	9.42813	8.63231	9.43858	6.97787	6.66368	8.21214	6.88923	7.11653	7.16927	7.21823	7.42986	8.43049	8.69045	7.21449	7.34476	8.0513	7.94803	7.28625	8.06459	9.25434	7.56964	4.73492	6.67971	6.91256	8.21503	7.62572	8.09151	7.2457	7.70746	8.14073	6.81091	8.32746	8.512	7.34474	6.15651	8.36161	8.43143	7.91656	6.52803	7.01575
NM_024662	NAT10	Homo sapiens N-acetyltransferase 10 (NAT10), mRNA.	1.58036	2.38e-16	3.91629e-12	6.53099	6.95309	6.67557	6.6779	6.77555	6.8012	6.81081	5.78774	6.63829	6.80847	6.33327	5.61862	5.76068	5.68687	5.88405	5.7341	5.65558	5.89258	5.41765	5.68352	5.62204	5.43016	5.79915	5.43158	5.68644	4.34226	5.80831	5.06769	5.7135	4.99646	4.98968	5.00412	5.93287	6.17577	5.63215	6.17683	6.25861	6.10974	5.87966	5.80444	5.65004	5.56321	5.00983	5.48465
NM_019014	POLR1B	Homo sapiens polymerase (RNA) I polypeptide B, 128kDa (POLR1B), mRNA.	1.58004	2.67e-15	4.39348e-11	5.0071	5.35826	4.91347	4.83622	4.52569	5.14947	4.9811	4.50125	5.26399	4.92244	5.4538	3.42625	3.26965	3.37572	3.45968	3.52704	3.80986	3.45048	3.67315	3.69313	3.74694	4.12432	3.39542	3.75697	3.87893	3.26507	3.97024	3.51825	3.37432	3.49603	3.27394	3.25744	3.59425	4.3809	3.85314	3.95569	3.91816	3.66731	3.43406	4.12484	3.95519	3.80801	3.3642	3.25992
NM_018428	UTP6	Homo sapiens UTP6, small subunit (SSU) processome component, homolog (yeast) (UTP6), mRNA.	1.57924	9.78e-14	1.6093e-09	6.7249	7.19035	7.12728	7.03053	7.09074	7.05697	7.15843	5.24258	6.49992	6.96034	6.02139	5.49041	5.61621	5.73747	6.06326	6.25049	6.456	5.41408	5.62089	6.12248	6.26994	6.2847	6.43977	6.78596	5.95679	3.632	6.03456	5.44347	6.21399	5.76813	5.91043	5.35065	6.0939	6.52534	5.71083	6.476	6.34422	6.43439	5.96202	6.72621	6.48028	5.7995	4.4215	4.566
NM_021033	RAP2A	Homo sapiens RAP2A, member of RAS oncogene family (RAP2A), mRNA.	1.57843	6.27e-14	1.03173e-09	7.31174	7.79364	7.29953	7.47728	8.17392	7.89341	7.9438	5.428	6.23471	7.16394	6.44911	6.08967	6.68564	6.32334	6.48459	6.57057	6.92069	6.74268	6.23153	6.13398	6.63523	6.10575	6.45114	7.23379	6.60161	3.51212	6.79265	6.05464	7.13516	5.9967	6.02928	5.36695	6.6419	6.40854	5.90799	6.92359	6.9311	6.60471	6.51988	6.30512	6.22736	5.93736	5.49651	5.03147
NM_000204	CFI	Homo sapiens complement factor I (CFI), mRNA.	1.5781	4.66e-07	0.00766803	4.23874	5.47309	6.05712	5.16288	6.32153	4.45409	5.20782	3.67753	3.53691	4.64481	3.6473	4.027	4.75303	3.06651	3.42506	4.42287	4.64851	4.76846	3.85243	3.97696	3.86262	3.62265	4.10477	4.25028	4.55389	3.13608	4.92761	3.11251	3.02125	4.40376	4.11824	3.9195	3.85835	4.25455	3.25395	3.58699	3.92207	3.32464	3.15343	5.43973	5.12754	4.43134	4.66495	3.69776
NM_002934	RNASE2	Homo sapiens ribonuclease, RNase A family, 2 (liver, eosinophil-derived neurotoxin) (RNASE2), mRNA.	1.57798	1.84e-09	3.02772e-05	3.32104	3.62587	3.26777	2.17588	3.26777	3.07443	3.07443	3.30254	3.38617	3.9651	1.87493	2.1195	2.46502	1.52565	2.20916	4.28565	4.90611	2.44548	2.17343	2.72548	1.29708	1.09678	3.46428	1.11314	1.56912	0.887275	0.935187	1.45787	0.998799	1.4219	1.54732	1.24689	1.99116	1.50098	1.71472	3.47649	2.15999	2.71922	1.13961	1.46629	1.50446	1.2788	2.12668	1.41963
NM_013339	ALG6	Homo sapiens asparagine-linked glycosylation 6 homolog (S. cerevisiae, alpha-1,3-glucosyltransferase) (ALG6), mRNA.	1.57779	2.03e-11	3.34037e-07	4.10099	4.28544	4.83215	4.35511	4.12227	4.33963	4.16301	3.07049	4.39917	4.64736	3.72198	3.02624	3.04577	2.99739	3.13344	2.86227	3.31599	3.09686	2.36388	2.52187	2.89093	3.13677	3.0231	2.7148	2.97085	1.72347	3.40794	2.61213	2.82555	3.08106	2.55864	3.32607	3.36983	3.83063	2.95295	3.34427	3.16206	2.98007	2.43547	4.27406	3.8389	3.02429	2.08422	2.35776
NM_030780	SLC25A32	Homo sapiens solute carrier family 25, member 32 (SLC25A32), mRNA.	1.57744	8.67e-12	1.42665e-07	7.09099	7.09164	7.32107	7.05773	7.41686	7.35319	6.94317	5.51736	7.37826	7.96067	6.68197	6.33277	6.32863	6.18978	6.66298	6.06378	7.18255	6.29283	5.81212	7.19259	6.43433	6.41298	7.38349	6.33751	6.49853	3.65451	6.44387	6.29557	6.37438	5.95748	6.15557	5.71637	6.97581	6.78066	6.08097	6.6322	6.52842	6.65725	6.26757	7.19495	7.13718	6.19996	5.30552	5.40477
NM_000819	GART	Homo sapiens phosphoribosylglycinamide formyltransferase, phosphoribosylglycinamide synthetase, phosphoribosylaminoimidazole synthetase (GART), transcript variant 1, mRNA.	1.57687	2.42e-16	3.98211e-12	6.94872	7.17387	7.00412	7.01699	6.93978	7.05592	7.3852	5.686	7.26016	7.17491	6.59638	6.17259	5.89239	5.89538	6.28681	6.22354	6.01771	6.12306	6.13877	6.04863	6.05739	6.16973	6.52789	5.87167	6.07808	3.71106	6.42052	5.51827	6.28928	5.82086	5.56761	5.59508	6.31407	6.73296	6.59602	6.88868	6.68606	6.72004	6.21924	6.41273	6.40832	5.75672	5.58639	5.44599
NM_019609	CPXM1	Homo sapiens carboxypeptidase X (M14 family), member 1 (CPXM1), mRNA.	1.5766	1.7e-08	0.000279735	6.01967	5.71303	6.25826	5.92776	7.36461	6.07244	5.868	5.99812	5.71423	6.38793	6.67896	6.42596	5.36473	5.4064	5.23968	4.69088	5.87695	5.33847	6.26675	5.06708	4.85033	4.88325	5.21633	5.21456	5.6006	5.00244	5.0072	4.46214	4.50088	4.65177	4.82299	4.6852	4.8592	4.84061	4.99968	4.90784	5.11072	5.12603	4.70474	4.77282	5.08105	4.74271	4.81986	4.71975
NM_006828	ASCC3	Homo sapiens activating signal cointegrator 1 complex subunit 3 (ASCC3), transcript variant 1, mRNA.	1.57606	3.8e-13	6.2529e-09	5.47833	6.34596	6.02013	6.08964	6.05518	6.12258	6.03626	4.40663	5.61321	5.5987	5.76816	4.17374	4.29186	4.12987	4.59374	4.69144	4.63391	4.45967	3.67179	4.43983	4.60671	4.46177	4.16034	4.88101	4.85607	3.08662	5.0809	4.2578	4.85766	4.55485	4.44917	4.29421	5.13849	5.46809	5.2115	5.26388	5.11171	4.74687	5.26971	6.08301	5.40776	4.79894	4.02123	3.94045
NM_002539	ODC1	Homo sapiens ornithine decarboxylase 1 (ODC1), mRNA.	1.57594	1.82e-09	2.99481e-05	9.39397	9.35714	9.05335	9.16742	8.92326	9.10377	9.47986	7.39774	8.71496	9.89109	7.98588	7.31678	8.08736	7.52694	8.12498	8.40668	8.51909	8.24124	7.25659	8.62812	8.43995	8.12813	8.55482	8.88746	8.21215	4.73982	8.15564	7.26811	8.10641	7.04571	7.9616	7.38341	8.59139	8.93172	7.6354	8.81195	8.65594	8.79072	7.86114	8.65461	8.46152	8.22714	7.7943	7.1002
ENST00000300146	FLJ36874	FLJ36874 protein (FLJ36874), mRNA gene:ENSG00000166889	1.57584	2.88e-13	4.73904e-09	6.39249	6.79364	6.51568	6.42853	6.7251	6.68429	6.58534	5.01851	6.22043	6.75155	5.47763	4.9371	5.50565	4.56228	4.96413	5.2738	5.46061	5.71457	5.07297	4.97065	5.33859	5.02501	5.2601	5.31879	5.89162	3.74532	6.10129	4.95166	5.65251	5.74278	5.06715	5.26856	6.17356	6.02441	5.63883	6.00472	6.43962	6.12827	5.38	5.72404	5.96372	5.43591	5.26027	5.08619
NM_014846	KIAA0196	Homo sapiens KIAA0196 (KIAA0196), mRNA.	1.57559	1.59e-14	2.61634e-10	5.71574	6.6104	6.07949	5.933	5.91791	6.19655	5.89349	4.73871	6.20971	6.01439	5.85638	4.5547	4.57336	4.50646	4.81706	4.97945	4.95814	4.70555	4.35827	4.58049	4.80636	4.76137	4.73615	4.59413	4.82737	3.33599	5.13091	4.98212	5.00204	5.28008	4.45236	4.89324	5.6245	5.4472	5.09467	5.47025	5.76112	5.40288	4.89474	5.58299	5.43714	4.99066	4.92026	4.20389
NM_031216	SEH1L	Homo sapiens SEH1-like (S. cerevisiae) (SEH1L), transcript variant 2, mRNA.	1.57547	1.44e-15	2.36952e-11	6.88992	6.93794	6.88289	6.76587	7.02077	7.07573	6.94487	5.54301	6.79092	7.64151	6.17125	5.97708	6.29949	6.11353	6.15878	5.78272	6.37033	6.42966	6.00072	6.37677	6.27066	6.11356	6.71143	6.1247	6.17855	4.3979	6.34404	5.72008	6.08141	6.23387	5.70614	5.44684	6.71847	6.56571	5.72542	6.50155	6.54607	6.35524	5.94566	6.39209	6.73289	5.74399	5.37076	5.37103
NM_012073	CCT5	Homo sapiens chaperonin containing TCP1, subunit 5 (epsilon) (CCT5), mRNA.	1.57547	6.75e-13	1.11071e-08	7.54117	7.87249	7.69284	7.54896	7.80852	7.63494	7.9747	6.27025	7.57018	8.05722	5.92884	6.16366	6.76186	6.63737	6.55032	6.44917	7.30369	6.60206	5.58809	6.75235	6.37388	6.50642	6.67389	6.93276	6.59603	4.87546	6.73219	6.48552	6.61448	6.36075	6.85323	6.03898	7.22143	7.24655	6.48053	7.05951	6.87801	7.12284	6.07086	7.37949	7.21137	6.53867	5.29297	5.81454
NM_001747	CAPG	Homo sapiens capping protein (actin filament), gelsolin-like (CAPG), mRNA.	1.57477	4.95e-11	8.14522e-07	7.76254	8.06346	8.45296	8.16048	7.47045	7.99031	8.45799	7.21275	7.25973	8.41494	7.27503	7.11321	7.21191	7.43527	8.0518	7.65306	6.81911	7.16582	7.35033	7.88734	7.77405	7.98235	7.62448	6.93925	6.83718	6.1802	6.96649	6.12849	6.37605	6.85469	7.03302	7.20259	7.39251	8.28834	7.32974	8.33315	8.37569	7.93936	6.07565	8.3229	8.1761	7.25063	5.97573	6.80837
NM_020432	PHTF2	Homo sapiens putative homeodomain transcription factor 2 (PHTF2), mRNA.	1.57442	2.61e-14	4.29476e-10	4.29687	5.38247	4.81995	4.43214	5.39438	4.82092	4.68126	3.85399	4.62738	4.61106	4.31271	3.04803	3.09919	3.00564	3.22296	3.47677	4.14213	2.97268	2.68872	3.21694	3.01576	3.11731	2.87278	4.12979	3.59248	2.28277	3.58096	3.31278	3.18038	2.91414	3.12119	2.97284	3.40759	3.5682	2.91233	3.17886	3.32589	2.96469	3.35059	4.11256	3.77978	2.84421	2.84421	2.80086
NM_003937	KYNU	Homo sapiens kynureninase (L-kynurenine hydrolase) (KYNU), transcript variant 1, mRNA.	1.57418	1.77e-07	0.00291253	4.38167	4.68443	5.31673	4.23486	4.46233	3.94557	4.54813	3.40511	3.96231	5.28526	4.4471	2.44782	2.9611	2.14113	2.54182	4.39188	3.62062	2.60714	2.6325	3.85188	3.5813	2.97975	3.16284	3.44874	3.75752	2.35171	4.04331	2.3576	2.72355	3.658	3.25172	3.9727	4.02899	4.0685	3.49815	4.34518	3.60837	3.21863	3.16124	4.50242	4.70721	3.01782	2.42376	2.9581
NM_002764	PRPS1	Homo sapiens phosphoribosyl pyrophosphate synthetase 1 (PRPS1), mRNA.	1.57418	3.07e-08	0.000505169	7.27399	7.99357	7.54998	7.46515	7.6882	7.6066	7.50304	4.59727	6.88632	7.29499	6.1787	7.2013	6.21998	6.44081	7.22292	7.28971	6.58011	6.17634	7.45693	7.08907	6.85912	6.82261	7.36115	6.50492	6.29251	3.07674	6.5091	4.90013	7.05044	6.14445	6.12682	5.63365	6.24476	6.91019	5.63816	7.21875	7.48001	7.05408	5.78966	6.98386	6.7694	6.34941	5.71453	5.91666
NM_015294	TRIM37	Homo sapiens tripartite motif-containing 37 (TRIM37), transcript variant 1, mRNA.	1.57339	4.15e-16	6.82883e-12	5.63762	6.53186	5.86854	5.89756	6.13032	6.36877	6.32935	4.5259	5.6693	6.03742	5.37197	4.59416	4.64021	4.637	4.84507	4.69552	4.87804	4.53404	4.41235	4.56328	4.61786	4.61685	4.57955	5.11945	4.80637	3.52611	4.76161	5.02095	5.13953	4.62739	4.3344	4.23167	4.79488	5.13591	4.94025	5.24562	5.39121	5.24413	5.36603	4.96061	4.91742	4.56327	4.56968	4.00657
NM_001031720	GSTCD	Homo sapiens glutathione S-transferase, C-terminal domain containing (GSTCD), transcript variant 1, mRNA.	1.57337	1.04e-15	1.71132e-11	4.70248	5.2637	4.79348	4.49299	4.34472	4.66728	4.67294	4.12827	4.43143	4.93043	4.58597	3.73869	3.64503	3.47423	3.76928	4.09204	3.77834	3.69536	3.45861	3.73347	3.5152	3.72778	3.34378	4.025	3.18932	3.04353	4.32974	3.99463	3.81329	3.75409	3.539	3.13895	4.30921	4.53418	3.92553	4.55412	4.1865	4.24269	4.25148	3.78811	3.74912	2.55495	2.87391	2.70085
NM_001950	E2F4	Homo sapiens E2F transcription factor 4, p107/p130-binding (E2F4), mRNA.	1.57275	1.35e-16	2.22143e-12	6.96858	7.37278	7.06357	7.08527	7.03949	7.10236	7.01371	6.43737	6.96729	7.09815	6.65159	6.10249	6.457	5.78412	6.09349	6.17162	5.9609	6.62109	6.12168	6.02814	6.27676	6.05469	6.20672	5.58627	5.72269	4.75237	5.54688	5.31967	5.37891	5.86744	5.57754	6.0656	6.49305	6.48471	6.49339	6.61458	6.92684	6.26556	6.09698	6.22292	6.20576	6.32839	5.30325	5.96912
NM_001005749	GBA	Homo sapiens glucosidase, beta; acid (includes glucosylceramidase) (GBA), transcript variant 4, mRNA.	1.57273	1.24e-10	2.04042e-06	5.93209	6.66243	6.52715	6.28006	6.57543	6.00352	6.29191	4.99548	6.32365	6.97578	6.01027	5.98562	6.50041	6.36651	6.34456	6.17163	5.97115	6.77598	6.19986	6.48331	5.97284	6.54434	6.29401	5.58557	5.66589	4.83369	5.68492	4.49622	5.86245	5.48064	5.77921	5.31106	5.74589	6.29749	5.60695	6.18918	6.36329	6.26495	5.42955	6.21227	6.40645	5.67558	5.50115	5.55301
NM_001098511	KIF2A	Homo sapiens kinesin heavy chain member 2A (KIF2A), transcript variant 2, mRNA.	1.57177	1.18e-14	1.94169e-10	6.23658	7.76087	7.20104	7.03306	6.92009	7.18925	7.18699	4.9396	6.3966	6.55677	5.81527	5.26824	5.7248	4.97458	5.89033	6.0526	6.05821	5.89287	5.15808	5.21863	5.80063	5.7862	4.90697	5.92532	5.82252	3.58264	6.05871	5.24551	5.73887	5.20084	4.80698	5.20257	6.01213	6.84549	5.93761	6.37781	6.78522	6.22536	6.54604	6.50176	6.00467	5.65527	4.76601	5.17631
NM_014305	TGDS	Homo sapiens TDP-glucose 4,6-dehydratase (TGDS), mRNA.	1.57164	2.4e-11	3.9492e-07	3.72624	4.35069	4.63003	4.15627	4.6064	4.46485	4.50252	3.43535	4.37925	5.70003	4.37568	3.21997	3.31469	3.34733	3.4835	3.11752	3.84801	3.23184	2.93146	3.36209	3.21686	3.6233	3.67765	3.40254	2.81578	2.29586	3.43798	3.56764	3.68881	3.96201	3.68236	2.92042	3.91975	3.38401	3.17817	3.61694	3.48216	3.408	3.12895	4.42861	4.15365	3.6893	2.59821	2.56085
NM_005476	GNE	Homo sapiens glucosamine (UDP-N-acetyl)-2-epimerase/N-acetylmannosamine kinase (GNE), mRNA.	1.57076	4.88e-09	8.03004e-05	6.16291	6.79361	6.64964	6.46949	6.82733	6.94818	6.92773	5.39653	6.1146	6.45394	6.04506	5.22193	5.35329	5.18916	5.24509	5.28267	5.45287	5.35329	4.92963	5.26632	5.20148	4.9757	5.13667	5.22269	5.79168	3.85553	5.43456	5.19149	6.06997	4.66571	4.97774	4.83129	5.64627	5.27115	4.57029	5.46717	5.61135	5.44172	5.21032	5.63856	5.48429	5.66466	4.78228	4.69006
NM_005915	MCM6	Homo sapiens minichromosome maintenance complex component 6 (MCM6), mRNA.	1.5705	9.93e-19	1.63398e-14	5.56804	6.28545	5.92113	5.60269	6.14072	5.80141	6.03162	4.79834	5.24244	6.07628	5.36965	4.18684	4.68829	4.25658	4.4647	4.59182	5.1018	4.61807	4.20991	5.04084	4.6809	4.65142	4.37723	4.80085	4.79373	4.0677	4.71966	4.57052	4.67345	4.30657	4.72374	4.17574	4.84262	5.30705	4.6561	5.31626	5.00049	4.8756	4.57292	5.39231	5.32201	4.32672	4.27704	4.13426
NM_002535	OAS2	Homo sapiens 2'-5'-oligoadenylate synthetase 2, 69/71kDa (OAS2), transcript variant 2, mRNA.	1.57033	1.26e-09	2.07333e-05	5.8135	6.70254	6.78458	6.55931	6.053	6.24338	7.08175	4.74303	5.45696	6.70235	5.34605	4.55725	5.0743	6.24881	5.31853	6.07988	5.30574	5.15585	4.2961	5.09572	5.3766	5.10675	6.0749	5.52549	5.20427	3.25894	5.28342	3.84091	5.144	5.41	5.0774	5.00135	5.54083	5.83397	6.50117	6.28435	6.43568	6.3661	4.20796	5.50485	5.86362	4.97132	4.4261	5.10402
NM_018101	CDCA8	Homo sapiens cell division cycle associated 8 (CDCA8), mRNA.	1.57012	3.69e-15	6.07189e-11	5.13801	5.4664	5.26115	4.90602	4.84008	4.91958	5.25293	4.91904	4.47992	4.7866	4.70216	2.9434	3.79195	3.92309	3.07491	3.44354	3.13626	4.11709	3.90657	4.21957	4.1406	3.66669	3.80511	3.66808	3.88117	4.04532	2.83449	3.06154	2.94521	3.08824	3.58299	3.23267	3.57274	4.25818	3.57828	3.71939	3.92629	4.0338	3.87464	4.05128	3.8878	4.03961	3.91779	3.96684
NM_001042517	DIAPH3	Homo sapiens diaphanous homolog 3 (Drosophila) (DIAPH3), transcript variant 1, mRNA.	1.56969	1.04e-13	1.71132e-09	3.26907	2.88525	2.85677	2.75873	2.64095	2.76964	2.88048	2.97659	2.98487	3.46934	3.35909	1.76657	1.54252	1.78356	1.84773	1.76861	2.29831	1.9689	2.16846	1.91054	1.99862	1.75078	1.96913	2.36003	2.15594	1.90453	1.98766	1.86999	1.76754	1.97452	1.90371	2.03797	2.54331	2.17603	2.26272	2.35363	1.99158	2.03706	2.03668	2.03948	2.14915	1.9446	2.67811	1.80467
NM_001154	ANXA5	Homo sapiens annexin A5 (ANXA5), mRNA.	1.5695	3.65e-08	0.000600608	9.30995	9.64744	9.67669	9.32919	10.391	9.59146	9.20926	7.34259	8.86996	9.96953	8.46759	8.69769	8.1636	8.90462	9.32871	8.88132	9.33911	8.2885	8.54457	9.28683	8.79967	9.30523	9.15378	9.1736	8.87834	4.49134	9.17021	8.33538	9.34605	8.44981	8.82957	7.8817	8.40959	9.31526	7.88718	9.20693	9.50854	8.87927	8.53092	9.1241	8.83477	7.98963	7.48021	7.48758
NM_018103	LRRC8D	Homo sapiens leucine rich repeat containing 8 family, member D (LRRC8D), mRNA.	1.56864	4.73e-15	7.78322e-11	6.9702	7.27821	6.92063	7.08248	7.14157	6.46743	6.88435	5.99304	7.1574	7.12108	6.79064	5.88166	6.12228	5.84229	6.43539	6.03348	6.0571	6.42296	5.48473	5.48589	5.88662	5.9164	5.42152	5.80196	5.56793	3.85675	5.60571	4.95968	6.02865	5.89631	5.36195	5.39928	6.00124	6.70246	6.27518	6.27954	6.40871	6.48247	5.98926	6.59257	6.03876	6.38785	5.21249	5.36504
NM_030579	CYB5B	Homo sapiens cytochrome b5 type B (outer mitochondrial membrane) (CYB5B), mRNA.	1.56853	2.19e-09	3.60365e-05	9.5896	9.87825	9.71045	9.98939	9.75293	9.7786	9.96834	7.69645	9.49083	10.0959	8.44814	9.48621	9.28374	9.02695	9.41769	9.52151	9.75037	9.36967	9.42126	9.30716	9.4085	9.20467	9.41323	9.62647	8.88403	5.00232	9.0598	7.4331	9.37435	8.16105	9.18488	7.82799	9.03392	9.24414	8.6494	9.82395	9.90662	9.9439	8.80448	9.48045	9.73179	8.80549	8.74904	8.26783
NM_014167	CCDC59	Homo sapiens coiled-coil domain containing 59 (CCDC59), mRNA.	1.56852	7.82e-08	0.00128678	5.27702	6.72644	6.33568	6.38402	6.39689	6.59849	7.10105	3.86206	6.17762	6.64949	5.2123	5.6704	4.9592	4.33084	6.07222	6.2438	5.732	5.26891	5.75721	5.15611	5.59955	5.66813	5.97427	5.52324	5.05071	1.81466	6.19423	5.05553	6.12439	6.42051	4.87965	5.29291	6.15759	5.92804	5.11517	6.25028	6.81194	6.5537	5.46042	4.94453	5.03121	4.06992	3.52815	3.84784
NM_016032	ZDHHC9	Homo sapiens zinc finger, DHHC-type containing 9 (ZDHHC9), transcript variant 1, mRNA.	1.5683	8.07e-12	1.32792e-07	7.48463	7.64754	7.37439	7.69315	7.22433	7.30737	7.49344	6.15247	7.42446	7.54893	6.77406	6.83964	6.86752	6.43348	6.95223	7.0082	7.02061	7.02527	6.99444	6.49805	6.83367	6.57719	6.95439	6.29143	6.46554	4.83196	7.2643	6.0016	6.99942	6.4006	5.76928	5.98936	7.22583	7.40655	6.95543	7.48285	7.95297	7.50608	6.59548	6.52826	6.63389	6.74927	6.56033	6.37509
NM_032812	PLXDC2	Homo sapiens plexin domain containing 2 (PLXDC2), mRNA.	1.56822	1.29e-10	2.1227e-06	6.18809	7.06604	6.7654	6.52207	7.83709	7.3597	6.73863	5.37253	6.01532	6.5205	6.09267	5.57457	5.7101	4.97016	5.81141	5.96128	6.25312	5.78711	5.37053	5.04185	5.35786	5.40207	5.4292	5.69949	6.18544	3.57892	6.20858	5.51198	5.54758	5.23901	5.51305	4.94461	6.06209	5.63725	5.14132	6.08119	6.30262	5.92534	6.22733	5.63041	5.48347	5.36078	4.34404	4.45007
NM_005745	BCAP31	Homo sapiens B-cell receptor-associated protein 31 (BCAP31), mRNA.	1.56778	5.17e-10	8.50723e-06	8.25076	8.32026	8.48478	8.24141	8.88581	8.51364	8.25209	7.50202	8.61512	8.57957	7.13193	7.93	7.45525	7.95657	7.93	6.92202	6.96443	7.68669	8.3258	8.07971	7.44897	7.69991	7.85213	7.42673	8.28763	4.408	7.84615	6.49779	7.28305	5.87103	7.42846	6.56331	8.0882	8.03054	7.32337	8.26646	8.2764	7.89572	6.86602	7.70375	8.15197	7.51675	6.53299	5.64818
NM_003400	XPO1	Homo sapiens exportin 1 (CRM1 homolog, yeast) (XPO1), mRNA.	1.56733	1.63e-11	2.68217e-07	6.23897	7.58221	7.24612	7.03327	7.34347	7.20413	7.11478	5.1037	6.85056	6.84484	6.19097	5.18816	4.77399	5.54378	5.9708	5.65753	6.25913	5.12316	4.45995	5.60236	5.65093	6.01586	5.70251	6.07665	6.09754	2.88099	6.31283	5.88117	6.2882	5.90109	5.30479	5.12237	6.16552	6.71231	6.26799	6.50814	6.29292	6.21589	6.36714	7.13584	6.20703	5.55687	4.68274	4.28463
NM_006018	GPR109B	Homo sapiens G protein-coupled receptor 109B (GPR109B), mRNA.	1.56568	1.11e-07	0.0018265	5.32096	5.2331	5.59355	4.61325	5.08033	5.31966	5.19717	4.49759	4.20462	5.3204	4.3832	3.50134	3.96306	2.87024	3.29345	3.86575	3.86055	4.39938	3.58866	2.57721	2.39634	2.98948	3.17573	3.08609	4.40729	3.25793	4.19935	2.40456	2.24765	2.26001	1.98708	2.25664	2.97655	3.94011	3.49492	3.97826	3.83629	3.36286	3.36196	1.61046	3.3721	1.5583	4.48901	2.31762
NM_004897	MINPP1	Homo sapiens multiple inositol polyphosphate histidine phosphatase, 1 (MINPP1), mRNA.	1.56566	5.4e-12	8.8857e-08	6.1513	6.10608	6.13605	6.17678	6.41453	5.92863	6.33523	4.2329	5.77531	6.72752	5.22557	4.88019	5.51751	5.37361	5.81182	5.3098	4.64016	5.37338	5.13432	4.91685	5.34803	5.60603	5.39752	4.90275	4.77724	2.3179	4.71362	4.1039	5.57345	5.49923	4.38355	4.58498	5.35223	6.15736	5.21277	6.10019	5.79802	5.5838	3.92812	5.55301	5.53817	5.02438	5.18338	4.22222
NM_003510	HIST1H2AK	Homo sapiens histone cluster 1, H2ak (HIST1H2AK), mRNA.	1.5654	1.16e-11	1.90878e-07	7.58469	7.67912	7.72581	7.58022	7.26892	7.21517	8.06889	7.17991	7.13246	7.64316	8.92922	6.81217	7.08111	6.39683	6.61932	6.67075	7.23438	6.74593	5.99977	7.29562	6.33298	6.04963	5.85104	6.65009	6.81196	5.87779	6.44754	4.98698	6.58079	6.88854	7.89816	7.10889	7.29057	7.74732	7.37622	7.13459	6.74142	6.47673	7.37685	7.63052	8.15083	7.64892	6.92516	7.17822
NM_016207	CPSF3	Homo sapiens cleavage and polyadenylation specific factor 3, 73kDa (CPSF3), mRNA.	1.56508	6.65e-13	1.09426e-08	5.71628	6.61528	6.06594	5.63743	6.41306	6.15528	5.86802	4.70625	5.9214	6.28092	5.21618	4.28812	4.58153	4.4446	4.90055	4.52931	5.09366	5.04458	4.0365	4.8239	4.63538	5.25959	4.75829	5.13129	4.86131	2.97955	4.88167	4.46178	4.75814	4.78416	4.56464	4.21018	4.81674	5.38608	4.64128	5.13255	4.87885	4.91038	4.80112	5.6785	5.30281	4.65423	3.5764	3.63854
NM_031935	HMCN1	Homo sapiens hemicentin 1 (HMCN1), mRNA.	1.5649	8.19e-10	1.34766e-05	4.61266	5.25854	4.42656	4.85569	6.18305	5.17752	4.61332	4.33271	5.17899	4.3555	4.82679	3.97024	3.50769	3.21468	3.57387	3.63269	3.95786	3.36049	3.73628	3.14622	3.0919	3.46591	3.09083	4.24242	4.58527	3.15918	4.94338	3.85117	4.05759	3.02945	3.44363	3.01901	3.27844	3.13834	3.14664	3.24018	3.54163	3.16187	4.38524	3.05953	3.17979	3.35304	3.17979	2.97719
NM_005434	MALL	Homo sapiens mal, T-cell differentiation protein-like (MALL), mRNA.	1.56473	3.39e-07	0.00557824	7.08662	7.45744	6.52988	7.33569	7.6649	6.59439	6.52226	6.15479	6.61077	6.79913	6.42736	5.48053	8.98373	5.39105	5.40702	6.18746	6.45431	9.21184	5.77555	5.45542	5.29167	5.13245	5.26609	5.9925	6.11003	4.61234	6.47118	6.08772	6.29575	5.79389	7.0039	5.22991	6.04562	5.81268	5.5308	5.85162	6.17985	5.92969	5.71972	5.371	5.84385	8.27705	5.80455	5.42608
NM_020474	GALNT1	Homo sapiens UDP-N-acetyl-alpha-D-galactosamine:polypeptide N-acetylgalactosaminyltransferase 1 (GalNAc-T1) (GALNT1), mRNA.	1.5642	1.37e-13	2.25433e-09	5.69798	6.53292	6.47847	6.28352	6.52532	6.4673	6.50333	4.75457	5.65977	6.44004	4.45299	4.04966	4.7569	5.14601	5.06368	5.04816	4.94365	5.07451	4.22966	4.99882	5.02703	4.86402	5.25298	5.85282	5.12278	3.6977	5.2651	4.99201	5.44635	4.82648	4.45424	4.48728	5.49817	5.73309	5.12657	5.62528	5.68169	5.29362	4.82911	6.20158	5.72736	5.11931	4.59743	4.08245
NM_013277	RACGAP1	Homo sapiens Rac GTPase activating protein 1 (RACGAP1), mRNA.	1.56397	5.15e-15	8.47432e-11	6.35811	6.91441	6.43717	6.77564	6.77598	6.86389	6.71221	5.95607	5.88468	6.38414	5.62384	4.38043	5.03249	5.04598	5.00738	5.30431	5.21384	5.00252	5.17668	5.85118	5.83464	5.64213	5.75451	6.3812	5.86511	5.12127	5.69104	5.36678	5.68204	5.31994	5.48506	5.29799	5.64296	6.03445	5.39425	5.84652	5.63284	5.58971	5.4829	5.51693	5.77876	5.68735	6.1009	5.02975
NM_018122	DARS2	Homo sapiens aspartyl-tRNA synthetase 2, mitochondrial (DARS2), mRNA.	1.56386	1.68e-12	2.76444e-08	6.55184	6.85832	6.4385	6.45154	6.15754	6.39576	6.58327	5.73585	6.77117	6.75416	6.05034	5.5117	5.2469	5.57045	5.78552	5.84393	5.57894	5.74743	5.42018	5.5774	5.85064	5.73795	5.58575	5.47965	5.39642	3.70231	6.0266	4.66161	5.67912	5.80032	4.96047	5.34858	5.69752	6.44878	6.00067	6.20078	6.15894	5.85889	5.07695	6.38313	6.0711	5.79868	6.59686	5.18455
NM_001044385	ALS2CR4	Homo sapiens amyotrophic lateral sclerosis 2 (juvenile) chromosome region, candidate 4 (ALS2CR4), transcript variant 1, mRNA.	1.5631	2.52e-11	4.14666e-07	4.33146	4.855	4.59561	4.04421	5.11932	4.52973	4.07101	4.29373	4.09601	4.74314	4.0298	2.95461	2.48547	3.11873	2.80559	2.86412	3.56122	2.66834	2.57716	3.13697	2.85525	3.29968	2.80119	3.2317	3.08194	2.52776	3.69184	3.45635	3.50636	3.01157	2.94277	3.00904	3.32842	3.45919	3.15985	3.5565	3.45127	3.50806	3.69339	2.96068	2.78427	2.47304	2.35046	2.31827
NM_152905	NEDD1	Homo sapiens neural precursor cell expressed, developmentally down-regulated 1 (NEDD1), mRNA.	1.56296	8.76e-13	1.44146e-08	5.22884	6.82672	6.08094	6.13523	5.70083	6.28546	6.34948	3.65629	5.47336	5.42507	4.85499	4.36965	3.94067	4.00842	4.71514	4.8657	4.38343	4.11211	4.48702	4.30202	4.72401	4.75954	4.68777	4.58867	4.60076	2.8114	5.13777	4.68851	5.1979	4.69144	3.85275	3.54054	4.62675	5.04779	4.26358	5.3543	5.57813	5.28533	4.85137	4.83509	4.85161	4.09485	3.38666	3.85833
NM_001360	DHCR7	Homo sapiens 7-dehydrocholesterol reductase (DHCR7), mRNA.	1.56296	6.45e-09	0.000106135	6.8443	6.67544	6.48178	6.76935	6.36255	6.52048	6.50219	5.88151	7.01919	6.68573	6.0531	6.37017	6.49848	5.72131	5.25449	5.57687	5.23498	6.54998	6.22646	5.75913	5.3374	5.26623	5.70891	5.39363	5.71591	4.45031	5.50354	4.1378	5.71301	4.92711	5.09448	4.20538	5.55819	5.8276	5.2396	6.47318	5.96244	5.65769	4.71346	5.32883	5.77507	5.4901	5.83425	5.40211
NM_006933	SLC5A3	Homo sapiens solute carrier family 5 (inositol transporters), member 3 (SLC5A3), mRNA.	1.56285	6.05e-10	9.95527e-06	7.0246	7.64602	6.97106	6.9057	7.76156	7.80333	7.28444	4.93408	7.05116	7.33392	6.66273	4.94801	4.70272	5.59816	4.56381	4.75468	4.94384	4.6902	5.06755	4.25476	5.45529	6.02956	4.90859	5.80261	6.52983	4.7752	5.95722	5.41104	6.55566	6.06227	5.11349	4.72467	6.32304	6.98029	7.12307	7.63597	6.89293	6.41692	6.06116	6.64597	5.62279	5.68529	5.62279	4.8753
NM_006346	C13orf24	Homo sapiens chromosome 13 open reading frame 24 (C13orf24), mRNA.	1.56265	5.42e-14	8.91861e-10	3.50224	4.62065	4.40268	4.25859	5.12159	4.436	4.4725	3.50814	4.17766	5.21352	4.31186	2.24916	2.09402	2.16857	2.64114	2.59386	3.01717	2.07061	2.51226	2.59866	2.93675	2.8055	3.06945	3.08773	2.58497	1.76172	2.31725	2.39199	2.30388	2.7437	2.05173	2.76016	3.38391	3.06258	3.27762	3.11888	3.45058	2.93926	3.34212	3.1015	2.95306	1.94737	1.78856	1.59896
NM_003953	MPZL1	Homo sapiens myelin protein zero-like 1 (MPZL1), transcript variant 1, mRNA.	1.56248	1.25e-12	2.05688e-08	7.2327	8.07334	7.58671	7.58471	7.79406	7.65881	7.77836	6.35107	7.46095	7.85368	6.82727	6.68296	6.58988	6.36552	6.58625	6.53138	6.44122	6.52762	6.47017	6.44995	6.58894	6.64631	6.32002	6.69451	6.52238	4.50709	6.79769	6.4479	7.06415	6.66124	6.59157	6.4755	7.25771	7.18626	6.97319	7.34597	7.7175	7.0115	7.03399	7.11952	7.03484	6.69642	6.69642	6.48598
NM_015355	SUZ12	Homo sapiens suppressor of zeste 12 homolog (Drosophila) (SUZ12), mRNA.	1.5619	6.98e-11	1.14856e-06	6.44487	6.82004	6.62253	6.36518	7.66136	7.04468	6.96642	4.84891	6.32116	7.60932	5.31244	4.42974	4.31378	4.78377	4.72925	5.04189	5.44126	4.80758	4.50426	5.0363	5.1677	4.74874	5.05479	5.25997	5.33023	3.0251	4.98178	5.08297	5.47219	6.06774	4.85183	5.3631	6.63355	6.28275	5.55528	5.77965	6.06007	6.0349	5.56102	6.95138	6.53299	5.69133	4.24804	4.86279
NM_001288	CLIC1	Homo sapiens chloride intracellular channel 1 (CLIC1), mRNA.	1.56155	3.95e-12	6.49973e-08	8.67191	8.55011	8.81754	8.38707	8.71852	8.26812	8.5842	8.11711	7.91002	9.45224	7.17218	7.00032	8.36745	7.67953	7.64424	8.06835	7.94346	8.68336	7.42018	8.19101	7.92529	7.32973	7.96994	7.9017	7.77039	5.17832	7.78468	7.22182	7.14481	7.73834	8.58188	7.81785	8.13473	8.34152	7.75805	8.3818	8.37294	7.92892	6.74508	8.62705	8.52974	7.95047	7.25494	7.52746
NM_006530	YEATS4	Homo sapiens YEATS domain containing 4 (YEATS4), mRNA.	1.56152	1.03e-10	1.69486e-06	6.48455	6.77407	7.11275	6.37143	7.22609	6.68747	6.77813	5.41115	6.96733	8.33514	5.73178	5.2839	5.53683	5.84833	6.18486	5.99134	6.47578	5.68967	5.6168	6.23741	6.14422	6.42063	6.41027	6.64503	5.75779	3.92664	5.57206	5.8726	5.83477	6.13841	5.75323	5.2697	6.34371	6.22368	5.12812	6.1999	6.26933	6.23892	4.5191	6.53985	6.42132	5.37007	4.73934	4.91108
NM_006902	PRRX1	Homo sapiens paired related homeobox 1 (PRRX1), transcript variant pmx-1a, mRNA.	1.56138	7.74e-08	0.00127362	6.02555	6.66346	5.97142	5.90094	6.89726	6.64067	6.11204	5.79832	5.75678	5.7639	5.38831	5.58277	5.02688	4.80311	5.55946	5.38225	6.18407	4.75582	5.44448	4.75058	4.73086	5.26899	4.48999	5.61309	5.61039	5.33572	5.1157	4.77362	4.91684	3.70309	5.03907	4.36669	4.71985	4.449	4.07448	4.87164	5.5456	4.67025	4.45347	4.39943	4.70242	4.58224	4.73419	4.50831
NM_020750	XPO5	Homo sapiens exportin 5 (XPO5), mRNA.	1.5613	1.12e-14	1.84296e-10	6.28175	6.74344	6.24897	6.20768	6.23626	6.23276	6.36383	5.37772	6.47583	6.53195	6.12735	4.86281	4.85681	4.91855	5.24244	5.19701	5.24079	4.92009	4.93084	4.88862	5.36174	5.38381	5.1607	5.09337	5.19089	4.17734	5.39557	4.63916	5.06999	4.90375	4.79049	4.67693	5.43993	5.84022	5.49586	5.6938	5.72082	5.71313	5.51488	5.54776	5.39948	5.11788	5.26898	4.69914
NM_032876	JUB	Homo sapiens jub, ajuba homolog (Xenopus laevis) (JUB), transcript variant 1, mRNA.	1.56112	7.48e-16	1.23083e-11	5.77609	5.42709	5.36856	5.43978	5.28938	5.49471	5.45012	5.22601	5.23845	5.90683	5.23608	4.78399	4.63584	4.81834	4.97401	4.68902	4.66201	4.61353	4.7275	4.45737	4.35496	4.58758	4.92258	4.11281	4.73922	4.3835	4.25738	4.03656	4.20059	4.10179	4.30432	3.65177	4.47885	4.78227	4.66444	4.92586	4.54382	4.92781	4.42302	4.30629	4.28536	3.84457	4.83472	4.0954
NM_000693	ALDH1A3	Homo sapiens aldehyde dehydrogenase 1 family, member A3 (ALDH1A3), mRNA.	1.56059	4.98e-10	8.19459e-06	7.06032	6.37433	6.88979	6.18711	7.16661	7.16655	6.878	6.48548	6.4675	7.83277	6.43527	5.6217	5.89534	5.45933	6.09749	5.57075	6.31596	5.69295	5.68479	6.15344	5.79286	5.8786	6.13249	6.32058	5.44261	4.6553	5.52986	5.93937	5.28816	5.30893	5.7467	5.95792	6.13403	5.78224	5.29896	6.26742	6.41587	5.67138	5.76404	5.3565	5.49815	5.38434	5.01932	5.3565
NM_001516	GTF2H3	Homo sapiens general transcription factor IIH, polypeptide 3, 34kDa (GTF2H3), mRNA.	1.56058	6.18e-12	1.01692e-07	5.87228	6.6151	6.37602	6.24011	6.10923	6.44858	6.43938	4.3125	5.93917	6.29316	4.71151	5.32732	5.24771	5.31478	5.95777	5.65632	5.41605	5.25479	5.3528	5.48014	5.52832	5.40803	5.56482	5.42596	5.04029	2.5234	5.37365	4.55581	5.56019	4.68491	4.81629	4.49864	5.5233	5.82737	4.38452	6.07965	6.05947	5.73856	4.96485	5.41682	5.9663	4.51391	3.95229	3.76737
NM_001909	CTSD	Homo sapiens cathepsin D (CTSD), mRNA.	1.55991	9.86e-10	1.62246e-05	9.345	9.37184	9.64546	9.50263	9.69557	9.35763	9.49374	8.40962	9.50508	9.94453	8.83876	9.03757	9.42273	9.06647	9.05564	9.20636	8.40116	9.54825	9.33386	8.96453	8.91215	8.7029	8.76151	8.1824	8.33728	5.51196	8.56534	7.09487	8.61242	9.09231	8.83709	8.41809	9.52907	9.76647	8.95082	9.55286	9.76904	9.252	7.66698	8.78025	8.98914	9.1671	8.73956	8.81655
NM_021129	PPA1	Homo sapiens pyrophosphatase (inorganic) 1 (PPA1), mRNA.	1.55976	6.5e-15	1.06958e-10	7.56123	7.53017	7.79235	7.70444	8.33038	7.4314	7.51399	7.32218	7.00954	8.15947	7.35496	6.77522	7.12626	6.61817	6.93631	6.94784	7.64497	7.27377	6.76101	6.65574	6.79087	6.87009	7.25533	6.81962	6.84145	5.35886	6.5926	6.36284	5.97874	5.99197	6.15594	6.57733	7.03015	6.7915	6.26583	6.97206	6.8907	6.70005	6.52982	7.13945	7.25689	6.6735	6.09988	6.39156
NM_004622	TSN	Homo sapiens translin (TSN), mRNA.	1.55972	7.44e-13	1.22425e-08	6.20826	6.9616	7.0068	6.42997	6.95878	6.9056	6.69823	5.4207	6.44934	6.83694	5.11158	4.53861	4.76713	5.11024	5.29042	5.10391	5.66038	4.9716	4.69773	5.08622	5.24418	5.22776	5.19221	5.47658	4.86872	3.61307	5.27	5.16948	5.61662	4.93921	4.99623	4.94737	5.55349	6.15399	5.19537	5.62443	6.03739	5.5141	5.18881	5.91923	5.46357	5.06443	4.67153	3.89251
NM_002951	RPN2	Homo sapiens ribophorin II (RPN2), mRNA.	1.5596	3.57e-12	5.87443e-08	8.60534	8.46062	8.71754	8.512	8.37406	8.3182	8.6542	6.88285	8.2076	9.02693	7.41765	6.80237	7.56273	7.67856	7.50765	7.64329	6.96721	7.86398	7.23012	8.04975	7.70255	7.60877	7.94046	6.96495	7.1704	4.49784	7.32098	6.55608	7.85798	7.57687	7.32958	7.12593	7.9592	8.0722	7.53734	8.37229	8.41733	7.98621	6.54288	8.17976	8.04791	8.39056	8.0151	7.2035
NM_199344	SFT2D2	Homo sapiens SFT2 domain containing 2 (SFT2D2), mRNA.	1.55932	2.08e-10	3.42264e-06	6.4192	7.82996	7.48927	6.99759	7.98137	7.5022	6.45075	4.73844	7.34142	7.75754	6.72447	6.42838	6.03218	6.44425	6.93932	6.21774	6.51233	6.12766	5.90045	6.29388	6.29617	6.77075	5.80661	6.43416	5.92735	3.49249	6.60722	5.28659	6.50112	5.41815	6.26299	5.3249	6.78128	7.12378	5.96582	6.92735	7.39761	6.72827	6.15836	7.6337	7.70211	6.35471	5.89917	4.25313
NM_004094	EIF2S1	Homo sapiens eukaryotic translation initiation factor 2, subunit 1 alpha, 35kDa (EIF2S1), mRNA.	1.55903	1.72e-11	2.83026e-07	7.55451	8.4619	7.99067	7.92857	8.63407	8.65092	8.50646	6.82756	7.99917	8.79271	6.8567	6.82234	6.72972	7.07305	7.1889	7.16108	7.42686	7.01824	6.70122	7.36563	6.97524	7.0902	7.61415	7.04027	6.83572	4.1777	7.1024	7.10165	7.30053	6.83279	7.37053	6.63997	7.54989	7.58865	6.7475	7.868	7.75261	7.51352	7.34658	7.21342	7.31276	6.29316	5.59255	5.63257
NM_002346	LY6E	Homo sapiens lymphocyte antigen 6 complex, locus E (LY6E), mRNA.	1.55881	1.93e-08	0.000317582	8.64737	9.28214	8.92231	8.81804	9.503	8.72064	9.09496	7.12895	7.78901	8.51643	7.42274	7.90065	8.27631	8.51835	7.92595	8.23066	8.23991	8.44499	8.52727	8.01433	7.7306	8.06788	8.2764	8.77398	8.19509	5.70428	9.30278	6.76853	7.97591	7.75094	8.1962	6.66717	7.97082	7.92174	8.70655	8.4485	8.50546	9.05755	7.34844	7.87323	8.06934	7.64402	8.54225	7.86326
NM_004265	FADS2	Homo sapiens fatty acid desaturase 2 (FADS2), mRNA.	1.55842	3.55e-10	5.84152e-06	6.00506	6.43213	5.97317	5.83315	6.83483	6.42997	6.08657	5.36798	5.21746	5.745	5.77981	5.39926	5.2328	4.79195	5.11235	4.69096	5.33426	5.25063	5.15965	5.02536	4.60868	4.37756	4.52582	5.34304	4.30163	3.86035	5.44894	4.7132	5.44609	4.63976	5.32975	4.48331	5.24263	4.43877	4.12364	5.164	5.54561	5.25378	5.24995	4.44072	5.27548	4.96131	5.69441	4.95933
NM_003526	HIST1H2BC	Homo sapiens histone cluster 1, H2bc (HIST1H2BC), mRNA.	1.5582	1.2e-06	0.019746	6.13016	7.1151	6.86188	6.40203	6.43628	5.85525	5.40878	4.61997	5.40807	6.03215	5.57369	4.37768	5.613	3.46342	5.35233	6.28028	5.23325	6.19052	5.72655	4.74663	5.19302	5.96894	5.08981	4.90155	3.64975	2.28845	4.55501	4.26738	4.94158	5.29228	4.43138	5.2775	5.00535	5.73026	4.16165	5.15052	4.85801	4.67309	4.24183	5.78395	6.54147	5.10541	3.79157	4.41038
NM_017909	RMND1	Homo sapiens required for meiotic nuclear division 1 homolog (S. cerevisiae) (RMND1), mRNA.	1.55718	2.19e-10	3.60364e-06	3.55598	4.30809	4.31863	3.83661	4.25458	4.38686	3.72963	3.3162	3.88155	3.92062	3.32301	2.57409	2.23376	2.84648	2.8031	2.55687	2.50615	2.43274	2.27915	2.74767	2.41561	2.77626	2.19408	3.37495	2.80976	2.08265	2.64598	2.50971	2.39987	2.25423	2.25715	2.4275	2.8341	3.54789	2.86345	3.06099	2.97968	3.18176	2.68211	3.53315	2.89961	2.5457	2.06551	1.86077
NM_001033714	NOL1	Homo sapiens nucleolar protein 1, 120kDa (NOL1), transcript variant 2, mRNA.	1.55714	1.02e-18	1.67841e-14	6.41418	6.60862	6.3696	6.11468	6.10405	6.42148	6.50651	5.77201	6.31002	6.90278	6.47546	5.01487	5.43646	5.23888	5.17789	5.20217	5.2745	5.48322	4.73571	5.17082	5.03151	5.25305	5.38551	5.19989	5.41203	4.72978	6.13841	4.95611	5.04583	4.53082	4.95139	5.13022	5.42253	5.8196	5.06382	5.73818	5.7186	5.56125	5.5772	5.16643	5.33618	4.72429	5.01888	4.69829
NM_016445	PLEK2	Homo sapiens pleckstrin 2 (PLEK2), mRNA.	1.55647	2.09e-09	3.43909e-05	6.62645	6.2297	6.46569	6.48277	4.83683	5.46269	6.35955	5.29169	5.4204	6.97972	5.08382	4.18548	6.21616	5.54568	5.65575	5.78012	4.6507	6.06805	4.10922	5.72081	5.46091	5.34466	5.8365	4.49654	4.91167	3.24897	5.51414	4.36843	4.82045	5.44208	5.73015	4.45685	5.731	5.9241	5.08563	6.47062	5.60829	5.96163	3.76453	5.94049	6.40129	5.78332	4.46103	5.09272
NM_001008709	PPP1CA	Homo sapiens protein phosphatase 1, catalytic subunit, alpha isoform (PPP1CA), transcript variant 3, mRNA.	1.55617	1.25e-09	2.05687e-05	9.07509	9.18445	9.42239	9.18416	8.67493	8.77276	9.29408	7.1937	8.68187	9.6972	7.7336	8.99588	8.99522	9.11017	9.27056	9.29649	7.85512	8.94759	9.18651	9.00095	9.14971	8.79719	8.40457	8.21555	7.63332	5.12014	8.24825	6.47894	8.279	7.83321	7.87253	7.14426	8.02539	9.20023	8.35527	9.39057	9.76516	9.40818	7.03998	8.52039	8.77152	8.14954	7.49877	7.76655
NM_002800	PSMB9	Homo sapiens proteasome (prosome, macropain) subunit, beta type, 9 (large multifunctional peptidase 2) (PSMB9), transcript variant 1, mRNA.	1.55609	3.45e-09	5.67698e-05	8.42253	8.91399	9.49259	9.01288	9.92208	8.64638	9.96265	7.35276	7.98018	8.63143	7.57018	8.17915	9.1631	8.55415	8.68125	8.52465	9.13378	9.42385	8.43524	8.86836	8.77681	8.37362	8.01071	9.10091	8.97482	5.17719	7.97279	6.5917	7.87836	8.12004	9.07543	7.93222	8.0321	9.5217	7.61919	8.30109	8.14939	7.88025	6.43287	9.19882	9.43623	8.8267	7.00198	7.64272
NM_015529	MOXD1	Homo sapiens monooxygenase, DBH-like 1 (MOXD1), transcript variant 2, mRNA.	1.55596	3.58e-09	5.89089e-05	4.78017	5.23369	5.1919	4.79307	5.4236	5.00508	5.06072	4.40695	4.683	5.25604	4.95107	3.67622	3.76301	3.67993	4.13282	3.94574	4.35423	3.73888	3.26381	4.21044	4.00601	3.92055	3.90545	4.24231	3.1892	3.55921	3.19375	4.32367	4.07789	3.7688	4.33425	4.08184	4.27452	4.09368	3.59682	4.32664	4.36722	4.03643	4.04177	4.53399	4.32521	3.89737	3.47286	3.59519
NM_001001342	BLOC1S2	Homo sapiens biogenesis of lysosome-related organelles complex-1, subunit 2 (BLOC1S2), transcript variant 2, mRNA.	1.55493	1.86e-10	3.06063e-06	6.66694	6.74548	6.65081	6.70222	6.86354	6.3706	6.57693	5.43919	6.03101	7.56425	5.5486	5.88097	5.43365	5.88402	6.49439	6.07375	6.17215	5.90721	5.57857	6.19802	5.80027	6.12849	6.07966	5.7866	4.96745	3.47255	5.08085	4.91801	5.15422	5.2766	4.81046	5.7991	5.86373	5.55451	5.12958	6.07631	5.58634	5.85938	3.72901	5.26417	4.98584	4.77617	3.51645	4.29277
NM_005444	RQCD1	Homo sapiens RCD1 required for cell differentiation1 homolog (S. pombe) (RQCD1), mRNA.	1.55465	5e-13	8.2275e-09	6.41169	7.09612	6.54676	6.57141	7.01426	6.23686	6.607	4.69622	6.20788	7.61771	6.32446	5.96104	6.22318	5.50639	6.22519	6.76555	6.04216	6.15919	6.01104	6.05253	6.43551	6.34844	6.06888	6.10359	5.61646	4.14027	6.14254	5.10796	5.63185	5.76641	5.34379	5.3853	6.30572	6.44133	5.81215	6.27933	6.58838	6.25326	5.91516	6.15847	6.10125	5.43928	5.62636	5.28258
NM_024665	TBL1XR1	Homo sapiens transducin (beta)-like 1X-linked receptor 1 (TBL1XR1), mRNA.	1.55432	3.8e-10	6.2529e-06	6.89502	8.42322	8.00929	7.62255	8.22967	8.09933	7.80955	5.10986	7.58921	7.66738	6.5718	6.09896	6.38453	6.47682	6.90918	6.57397	7.01565	6.6445	5.89932	6.60071	6.95293	7.17213	6.37475	6.96202	6.99549	3.40171	7.12158	6.35184	7.03062	6.68774	6.28943	6.15922	6.97381	7.38013	6.89983	7.29826	7.22747	6.69695	7.16837	8.12009	7.47203	6.6199	5.20083	5.78379
ENST00000358017	FAM49B	family with sequence similarity 49, member B (FAM49B), mRNA gene:ENSG00000153310	1.5543	1.66e-12	2.73153e-08	6.11606	6.22253	6.65469	6.03989	7.46265	6.30986	6.7	5.47872	5.88288	7.00156	5.21039	4.52409	5.00946	5.16662	5.35619	5.77388	6.48556	5.19702	4.76161	5.69862	5.50133	5.23437	6.02982	6.11489	5.47092	4.22491	5.41247	4.94733	5.38654	5.80506	5.01549	4.82026	5.74066	5.96641	4.51656	5.72958	5.62655	5.3727	4.49231	5.94999	6.0801	5.31432	4.74715	4.52573
NM_016306	DNAJB11	Homo sapiens DnaJ (Hsp40) homolog, subfamily B, member 11 (DNAJB11), mRNA.	1.55418	3.96e-11	6.51618e-07	7.78715	7.97023	7.96561	7.6075	8.29154	7.40792	7.843	6.94689	8.05658	8.66733	7.22166	6.5257	7.67038	6.43592	6.9795	7.66553	7.34982	8.18509	6.39494	7.72201	7.47345	7.05292	7.88229	7.27215	7.04563	4.86677	7.17251	6.64934	6.87226	7.87687	7.42807	7.15837	7.76922	7.46192	6.99705	7.59084	7.18289	7.15478	6.52992	8.33049	7.93666	7.48389	7.56833	6.61899
NM_015696	GPX7	Homo sapiens glutathione peroxidase 7 (GPX7), mRNA.	1.5518	2.03e-08	0.000334037	5.56341	6.33742	6.28645	6.03069	6.47062	5.99946	6.12906	5.06238	5.84382	6.47053	6.14663	4.96465	4.8105	4.51856	4.75751	4.70955	5.21517	4.79682	4.3103	4.80819	4.7044	4.24446	4.40778	4.39071	3.72871	3.82057	5.07993	5.68127	5.64802	5.44699	5.56503	5.19625	4.85534	4.668	4.58104	4.30225	4.82691	4.47961	4.39463	5.46905	5.02522	4.4649	4.61062	4.90808
NM_005700	DPP3	Homo sapiens dipeptidyl-peptidase 3 (DPP3), transcript variant 1, mRNA.	1.55168	6.48e-19	1.06628e-14	7.08853	6.59516	7.06051	6.9123	6.39224	6.8472	7.02918	6.23662	6.87543	6.81828	6.64844	5.38013	6.12366	5.9399	5.83642	5.7024	5.17149	6.19832	5.83559	5.97907	5.86435	5.77899	5.8482	5.77282	5.89154	5.00651	5.31987	5.19978	5.22659	5.31807	5.72366	5.37692	6.05849	6.93462	6.15066	6.84321	6.92804	6.57744	5.051	5.85824	6.10555	6.20089	5.21565	5.39423
NM_022779	DDX31	Homo sapiens DEAD (Asp-Glu-Ala-Asp) box polypeptide 31 (DDX31), transcript variant 1, mRNA.	1.55164	6e-22	9.873e-18	4.98261	4.95986	5.00703	5.00196	4.76436	4.92988	5.03811	4.80902	5.13047	5.74139	5.74825	3.42352	3.56993	3.45319	3.61852	3.5293	3.40592	3.51252	3.54362	3.59516	3.44085	3.39035	3.67823	3.43736	3.69579	3.57045	3.60848	3.41004	3.35586	3.28871	3.35084	3.37301	4.08699	4.10684	4.0893	4.26021	4.18968	4.16222	4.20357	3.80803	3.58833	3.88474	3.93005	3.3696
NM_000175	GPI	Homo sapiens glucose phosphate isomerase (GPI), mRNA.	1.55143	1.87e-13	3.07708e-09	8.93792	9.28198	8.79585	8.81197	9.02515	9.13607	8.77696	7.35451	8.4705	8.76144	7.45273	7.87777	8.49874	7.89596	7.84483	7.47077	7.59969	8.78626	8.17379	8.05925	7.55483	7.51249	7.44229	7.41197	8.01177	5.06763	8.57249	6.75411	7.8867	7.59762	7.74417	7.24168	8.33025	8.52121	7.9666	8.43067	8.51993	8.7378	7.89467	7.6367	7.9116	8.07481	6.56648	7.22192
NM_001153	ANXA4	Homo sapiens annexin A4 (ANXA4), mRNA.	1.55128	9.21e-07	0.0151551	8.37135	8.52451	8.63645	8.26423	7.8636	8.00826	8.37251	7.34252	7.78559	8.53454	7.3862	6.87337	7.99191	7.57976	7.63357	7.40801	7.79553	7.87827	6.91537	7.93884	7.4693	7.47985	7.45658	8.22228	7.80836	4.47863	7.38317	6.5896	8.08815	8.23116	7.42026	7.75988	7.86444	8.46983	7.43394	8.13682	7.89048	7.84522	7.64279	8.471	8.16743	8.17254	7.60845	6.70371
NM_022121	PERP	Homo sapiens PERP, TP53 apoptosis effector (PERP), mRNA.	1.55008	7.85e-08	0.00129172	7.18316	8.58609	8.17336	8.60978	7.87222	7.9268	8.19991	6.53724	7.13336	9.10252	5.55216	6.75451	7.779	7.64208	7.32654	6.99711	7.59012	7.61837	6.29851	6.20949	7.29892	7.07927	5.95844	5.5908	6.02524	3.3406	6.69581	6.26942	6.50558	7.0789	6.09525	6.93065	7.59406	7.92991	7.34659	7.93872	8.49939	7.16102	5.31375	8.54621	7.79737	7.51183	6.40564	6.38654
AL512709	TBC1D16	Homo sapiens mRNA; cDNA DKFZp762G216 (from clone DKFZp762G216).	1.54978	4.1e-08	0.000674655	6.48475	6.93579	6.64703	6.76065	7.41334	7.27765	7.06099	6.14371	6.21456	6.32977	5.29077	5.6292	6.08821	5.30905	5.17298	5.71508	5.66185	5.98041	5.95973	5.48301	5.76646	5.13485	5.33996	5.34126	6.25515	3.38246	6.10656	5.28906	5.43573	4.73129	4.92507	4.92071	5.7906	5.37268	5.0068	5.46239	6.36679	5.47569	5.53762	4.74874	4.63525	4.67912	5.75002	5.56043
NM_016488	PPHLN1	Homo sapiens periphilin 1 (PPHLN1), transcript variant 1, mRNA.	1.54967	4.06e-17	6.68073e-13	5.82007	6.27219	6.34523	6.04064	6.4679	6.25572	6.33772	4.98194	6.22768	6.52631	5.86115	4.83368	5.04844	4.78441	5.26994	4.72221	5.23459	5.0251	4.58349	4.74248	5.03249	4.87073	4.71174	4.77677	4.61807	2.69824	4.80656	4.74235	5.0473	4.6296	4.71604	4.74966	5.74901	5.56072	5.22726	5.59538	5.6492	5.49496	5.40155	5.48257	5.28912	4.70449	4.21734	4.10645
NM_002916	RFC4	Homo sapiens replication factor C (activator 1) 4, 37kDa (RFC4), transcript variant 1, mRNA.	1.54965	8.46e-13	1.39209e-08	5.02259	6.0347	5.56684	5.194	5.84442	5.40008	5.718	4.99463	5.7429	5.6547	4.85097	4.56106	4.25552	4.55472	4.86173	4.53956	5.01736	4.4274	4.29601	4.72034	4.78382	4.79544	4.36962	5.22349	4.65396	3.60882	4.69571	4.56145	4.90952	4.28484	4.42819	4.04377	5.10144	5.42258	4.33484	5.34956	4.72611	5.05028	4.57798	5.29572	4.83418	4.30192	4.06504	4.06504
NM_002790	PSMA5	Homo sapiens proteasome (prosome, macropain) subunit, alpha type, 5 (PSMA5), mRNA.	1.54907	2.47e-10	4.06439e-06	5.96336	6.5215	6.74759	6.00594	7.27836	6.12344	6.22671	5.27916	6.27243	7.76248	5.57686	5.59848	6.78352	6.34463	6.11209	5.99868	6.97651	6.83579	4.97798	6.21764	5.86142	5.60653	6.14946	5.92335	5.64715	4.43059	6.10958	4.75589	5.66492	5.08363	6.91975	5.50112	6.22689	6.1362	5.41838	5.79582	5.71502	5.70616	5.16362	6.95033	7.1895	5.96927	4.82098	4.81757
NM_003701	TNFSF11	Homo sapiens tumor necrosis factor (ligand) superfamily, member 11 (TNFSF11), transcript variant 1, mRNA.	1.54904	3.5e-10	5.75925e-06	4.30524	4.25728	3.99068	4.18028	3.81271	3.99997	4.17983	4.08588	4.12755	3.90344	4.44801	2.74287	3.09368	2.76319	2.74035	2.83091	2.86205	2.83989	3.26514	3.41093	3.09056	3.11417	3.16597	3.38874	3.36566	3.48957	1.89308	1.9674	1.85114	1.89544	1.84316	3.24815	2.44757	2.36331	2.6982	2.36306	2.33817	2.41241	2.46256	2.23168	2.2719	2.7182	2.73613	2.49504
NM_020186	ACN9	Homo sapiens ACN9 homolog (S. cerevisiae) (ACN9), mRNA.	1.54904	5.96e-07	0.00980718	5.32808	6.06633	5.28518	5.23366	6.0263	5.00483	5.50334	4.51683	5.74485	6.55316	5.32992	4.55953	5.50727	4.93015	5.35361	5.59247	6.45152	5.66856	4.2294	4.93026	4.73646	4.74516	5.1008	5.37342	3.95173	1.89404	4.92175	3.90772	4.56454	5.03598	5.38122	4.93897	4.9732	5.2607	4.56412	4.32572	4.81813	5.29363	4.19406	6.039	5.94721	4.91172	3.91843	5.19699
NM_016639	TNFRSF12A	Homo sapiens tumor necrosis factor receptor superfamily, member 12A (TNFRSF12A), mRNA.	1.54888	7.21e-13	1.18641e-08	8.27698	7.10684	7.33495	7.29233	7.24937	7.19602	7.16541	7.21642	6.60807	8.86562	6.80088	6.389	7.47942	6.21465	6.28808	6.68738	6.99513	7.27597	6.41406	8.48564	6.03834	6.46009	6.98496	6.4298	6.67599	6.40457	6.7776	6.35518	6.02956	5.63826	6.72652	5.76985	6.77498	6.88275	5.33504	7.69739	7.08413	6.64067	7.41145	5.70193	7.00157	6.45634	6.49805	6.18606
NM_057175	NARG1	Homo sapiens NMDA receptor regulated 1 (NARG1), mRNA.	1.54885	7.95e-13	1.30817e-08	5.68554	6.75079	6.07496	5.95629	5.67472	6.36852	6.19147	4.27383	6.16023	6.07003	5.81254	4.56589	4.54801	4.57465	5.26442	4.90305	5.33805	4.74642	4.69435	4.52598	5.15139	5.54283	4.76244	5.22216	5.1762	3.90587	5.94231	4.86382	5.35375	4.87833	4.49958	4.80673	5.40576	6.05156	5.50262	5.81969	5.89538	5.43439	6.08136	5.98974	5.486	4.65939	4.8646	4.19847
NM_199324	OTUD4	Homo sapiens OTU domain containing 4 (OTUD4), transcript variant 1, mRNA.	1.54882	6.73e-11	1.10742e-06	5.51425	6.11381	5.97895	5.66147	5.67972	5.75867	5.76152	4.46949	5.79526	5.79314	5.65104	4.58267	4.63274	4.27743	4.73139	4.69603	4.57004	4.68168	4.03545	4.439	4.47378	4.04609	4.09406	4.22042	4.50121	3.74186	5.6192	4.21241	4.88139	4.78697	4.3693	4.39515	5.43173	4.8887	5.01488	4.78275	5.06131	3.97942	5.038	4.67452	4.49191	4.3918	4.00709	4.24446
NM_003132	SRM	Homo sapiens spermidine synthase (SRM), mRNA.	1.5486	4.9e-14	8.06295e-10	8.4968	8.56083	8.19682	7.97611	8.4734	8.03056	8.35188	7.18832	8.21871	8.74633	7.63231	7.51353	7.93509	7.03434	7.63084	7.44924	7.50622	7.9237	7.71739	7.80465	7.4995	7.75896	7.38592	7.5255	7.04991	6.84215	7.35771	6.27673	7.20832	7.20995	7.29166	6.47847	7.43349	8.14849	7.03109	7.7974	8.00742	8.06667	7.22327	7.31566	7.40486	7.29861	6.83042	7.11576
NM_006287	TFPI	Homo sapiens tissue factor pathway inhibitor (lipoprotein-associated coagulation inhibitor) (TFPI), transcript variant 1, mRNA.	1.54844	9.7e-10	1.59613e-05	5.3631	7.31246	6.66431	5.98339	6.927	6.66786	6.16861	4.38193	5.11799	5.56318	5.30359	5.48616	5.4051	4.17183	5.39631	5.42305	5.99268	5.60346	5.24263	4.79379	5.03632	5.4904	4.98489	5.36264	5.36092	3.36605	5.83951	5.09422	5.16113	4.51442	4.45066	4.32688	4.89252	5.15432	3.67349	5.34675	5.94589	5.05758	4.76253	5.10459	5.07802	4.44373	4.57469	3.7897
NM_004859	CLTC	Homo sapiens clathrin, heavy chain (Hc) (CLTC), mRNA.	1.54828	1.57e-12	2.58344e-08	8.32161	8.50818	8.42945	8.57474	8.48268	8.72223	8.56597	6.96018	8.42034	8.77619	7.66587	6.82759	7.16962	7.2968	7.33079	7.38417	7.19528	7.4196	6.91437	7.16715	7.30871	7.15496	7.46674	7.32465	7.66574	4.25848	7.61197	7.14431	7.5619	7.53363	7.26721	6.91441	8.27077	8.28243	8.0762	8.21126	8.2858	7.9036	7.62378	8.08015	7.76565	7.52004	6.52016	6.79633
NM_001040057	FAM133B	Homo sapiens family with sequence similarity 133, member B (FAM133B), transcript variant 2, mRNA.	1.54826	5.07e-07	0.00834269	1.18058	1.08003	0.782403	1.03537	1.08969	1.07218	1.17024	1.29701	1.06543	1.26054	0.937269	0.758238	1.64212	0.678757	1.40708	1.43285	0.804401	0.499129	1.61776	0.792586	0.755048	1.70139	2.16063	0.415841	0.277505	0.767776	1.02659	1.03809	0.701874	0.638308	0.718506	0.983909	1.16932	1.43925	0.645406	1.10551	0.817257	1.00889	0.995795	1.34814	0.76408	0.671331	0.938235	0.64439
NM_024629	MLF1IP	Homo sapiens MLF1 interacting protein (MLF1IP), mRNA.	1.54819	3.04e-10	5.00232e-06	3.85802	3.6788	3.51052	3.17368	3.17485	3.31438	3.4367	3.06318	3.36015	4.00683	3.97515	2.79427	3.34994	2.85424	2.98645	3.5455	3.55049	3.20766	2.61543	2.89718	3.33276	2.6857	2.54014	3.56127	2.65957	2.29391	2.97339	1.93274	2.26287	3.01527	2.3402	2.32811	2.37035	3.12493	2.54733	2.78993	2.49426	2.60357	2.6889	3.45403	2.97044	2.65115	2.63716	2.63716
NM_005767	P2RY5	Homo sapiens purinergic receptor P2Y, G-protein coupled, 5 (P2RY5), mRNA.	1.54777	6.54e-08	0.00107616	4.91639	5.82669	6.32102	5.49055	6.20834	5.25859	6.19652	3.9963	4.03385	5.15215	3.83457	3.54207	3.47671	4.54414	4.79545	4.24309	4.84219	3.70569	3.35431	3.40447	4.16154	4.61186	3.49165	4.85805	4.41468	2.75995	5.00774	4.59471	5.17548	4.83506	4.03806	4.40491	4.17267	3.98956	3.85615	4.32954	4.53226	4.07843	3.19255	5.92382	5.45903	4.20039	3.80102	3.22138
NM_000138	FBN1	Homo sapiens fibrillin 1 (FBN1), mRNA.	1.54764	2.91e-08	0.000478841	7.16171	7.9927	7.18888	7.13207	9.4178	8.78137	7.49603	6.02822	6.97646	7.20117	6.31999	7.27154	6.81992	5.7751	6.59604	7.15742	7.36332	6.93927	7.2709	6.35392	5.84559	6.44371	6.51251	7.2225	8.09313	4.41308	7.27382	7.39512	6.41299	5.23548	6.96765	5.72989	6.56132	5.57664	5.99081	6.22881	7.68285	6.07271	6.42057	5.88675	6.26155	5.91938	5.25142	5.1486
NM_005191	CD80	Homo sapiens CD80 molecule (CD80), mRNA.	1.54743	2.1e-11	3.45555e-07	3.86955	4.03812	4.0267	3.73142	4.00094	3.56348	4.09959	3.34791	3.47871	4.26206	4.56505	2.76678	3.26822	2.93693	2.80112	3.25901	3.40726	2.69857	2.30094	2.6067	2.25181	2.6402	2.37293	2.9874	2.68763	2.62771	2.44196	2.11869	1.97366	2.02893	2.21452	2.98802	2.58391	2.87198	2.39908	2.28503	2.33128	2.68822	2.73124	3.30665	3.65997	2.85367	2.85821	2.96306
NM_007215	POLG2	Homo sapiens polymerase (DNA directed), gamma 2, accessory subunit (POLG2), mRNA.	1.54736	6.49e-12	1.06793e-07	4.66915	4.76983	4.74987	4.97742	4.93495	4.84025	5.07082	4.64505	4.69885	4.87409	5.16015	3.70381	3.1609	3.54629	4.10268	4.0939	3.17711	3.10701	3.61961	3.4815	3.83521	3.81331	3.91564	3.86705	4.28939	3.40517	5.27639	3.31424	3.64505	2.87137	2.5543	3.27204	4.20202	4.13529	4.37057	4.39401	4.12707	3.87134	3.98654	3.88537	3.44274	2.79602	3.22913	2.41602
NM_002627	PFKP	Homo sapiens phosphofructokinase, platelet (PFKP), mRNA.	1.54637	7.57e-19	1.24564e-14	7.31375	7.44652	7.00261	7.24827	7.32163	7.09299	7.33107	6.45607	6.49835	7.67987	6.77691	5.48262	7.04755	6.11974	6.00468	6.53949	6.14105	7.06593	5.63489	5.95845	6.04612	5.94726	5.7573	5.81838	6.33288	5.25376	6.45213	5.84221	6.65586	6.02521	6.20029	5.83051	6.52884	6.73918	6.23262	6.96542	7.19253	6.85713	6.76977	6.19246	6.58544	6.5345	5.74124	5.92497
NM_030980	ISG20L2	Homo sapiens interferon stimulated exonuclease gene 20kDa-like 2 (ISG20L2), mRNA.	1.54612	1.89e-11	3.11e-07	6.50298	7.2645	6.79412	6.64589	6.35564	6.59363	6.69163	5.37951	6.35934	6.97678	6.5423	5.93071	6.19444	5.59006	6.26128	6.50218	6.40905	6.25557	5.6489	5.59064	5.96556	5.81929	5.77832	5.44489	5.28686	3.85443	6.37097	5.39327	5.43557	5.40223	5.22477	5.06026	6.00389	6.59011	5.98312	6.53593	6.64574	6.62937	6.25939	6.18888	6.29972	5.65929	5.12445	5.40723
NM_002497	NEK2	Homo sapiens NIMA (never in mitosis gene a)-related kinase 2 (NEK2), mRNA.	1.54556	5.57e-14	9.16544e-10	6.36261	6.05749	6.10776	6.30466	6.13233	5.86937	6.65472	6.2613	6.22413	6.33426	6.79092	5.36494	5.90379	5.48556	5.34685	5.65621	5.67419	5.64972	5.24256	5.40192	5.18515	4.9801	5.0582	5.9231	5.32504	5.55829	4.58753	4.03317	5.034	4.8602	5.19939	4.65845	5.17801	5.4959	5.3726	5.44726	5.36019	5.58134	5.42832	5.24915	5.24876	5.52557	5.93252	5.15235
NM_001281	TBCB	Homo sapiens tubulin folding cofactor B (TBCB), mRNA.	1.54529	1.05e-11	1.72777e-07	8.18452	8.78903	8.14273	8.46867	8.37626	8.47261	8.49912	7.17277	7.70822	8.64457	7.8138	7.9884	7.69055	7.30248	7.85588	8.08129	7.83531	7.63067	8.45675	8.00598	7.89393	7.66698	7.71136	7.45219	6.98616	4.82387	7.32902	6.62483	7.67947	6.77147	7.55202	6.9455	7.63602	7.91999	7.23607	8.24122	8.70691	8.41345	7.67724	7.50126	7.6406	7.042	6.93653	6.87589
NM_181578	RFC5	Homo sapiens replication factor C (activator 1) 5, 36.5kDa (RFC5), transcript variant 2, mRNA.	1.54496	1.48e-13	2.43534e-09	4.75723	5.52767	5.08679	4.88331	5.33468	5.19365	5.21446	4.29796	4.83168	5.77677	4.87903	4.06129	4.52181	4.17508	4.49369	4.1115	4.47145	4.35174	4.06882	4.30257	4.48146	4.11317	4.145	4.15618	3.99426	3.31065	3.86974	3.59304	4.03169	3.96698	3.82273	3.69654	3.83255	4.19928	3.70136	4.14459	3.98543	4.14416	3.58335	4.3486	4.18024	3.78076	3.74769	3.46237
NM_002659	PLAUR	Homo sapiens plasminogen activator, urokinase receptor (PLAUR), transcript variant 1, mRNA.	1.54493	1.09e-09	1.79359e-05	7.43235	6.83024	7.49918	6.517	7.08976	7.14838	7.56677	5.74673	5.93322	8.05711	6.23271	6.06317	6.62631	5.81174	6.46574	6.47009	6.98344	6.4656	6.22279	6.84551	6.12352	5.83944	7.15833	6.40226	7.02225	5.19144	6.75835	5.46918	5.47679	5.83436	6.09565	5.42215	5.85015	6.80451	5.3563	7.01808	6.79494	6.25792	5.45953	6.11414	7.08498	5.5401	5.99807	5.75221
NM_005381	NCL	Homo sapiens nucleolin (NCL), mRNA.	1.54474	1.32e-10	2.17206e-06	6.63287	7.91237	7.06914	6.18425	6.89776	6.79137	6.08071	6.83745	7.37259	7.11135	6.59319	5.29673	5.5904	5.24064	5.66494	6.15794	7.10298	6.1367	5.49215	6.05809	6.31515	5.57509	5.9821	6.56652	6.36067	4.33667	7.41141	7.62834	6.49176	7.0906	6.56009	6.64675	6.80029	6.80831	6.38366	6.38403	6.66575	6.73503	6.41826	7.96362	7.19996	7.21272	6.09912	5.8949
NM_006129	BMP1	Homo sapiens bone morphogenetic protein 1 (BMP1), transcript variant BMP1-3, mRNA.	1.54466	7.75e-18	1.27526e-13	5.80173	5.92227	5.9519	5.99351	6.32975	6.20983	5.86101	5.82104	5.74822	6.28394	6.17819	5.14326	5.37463	5.02851	5.21648	5.02274	5.32378	5.2781	4.80237	4.69598	4.65232	4.69033	4.7452	4.6039	4.78116	4.77744	4.94941	4.24938	4.33743	4.22302	4.61225	4.60303	4.76296	5.0045	4.87437	4.73525	5.10991	5.12873	5.06468	4.56706	4.6794	4.6794	4.64589	4.62034
NM_002835	PTPN12	Homo sapiens protein tyrosine phosphatase, non-receptor type 12 (PTPN12), mRNA.	1.54454	6.96e-11	1.14527e-06	5.85036	7.16473	6.45265	6.1698	7.0288	6.77982	6.33824	5.12688	5.85851	6.73671	5.91237	4.93576	4.71628	4.87502	5.18563	5.23083	6.01548	4.95251	4.54363	5.46228	5.4094	5.75136	5.14835	6.05669	5.95145	3.28715	6.18382	5.84659	5.81626	5.91336	4.95686	4.67314	5.70159	5.84399	5.24953	5.68678	5.90287	5.69514	6.39802	5.81085	5.68745	4.37233	3.99151	4.38077
NM_017515	SLC35F2	Homo sapiens solute carrier family 35, member F2 (SLC35F2), mRNA.	1.54442	1.53e-09	2.51762e-05	6.43349	5.63599	6.33252	6.16949	5.61263	5.95281	6.2923	6.04006	6.66137	6.77502	5.94263	4.6307	5.1325	5.18437	5.07452	5.49141	4.34979	5.55814	4.99656	5.11353	5.49788	5.13748	5.31782	6.10941	5.08479	3.81533	5.36854	4.82943	5.38423	4.8957	4.69076	4.9726	6.07513	6.72199	5.57411	6.1902	6.4356	6.2282	4.09051	5.68015	6.00525	5.99562	4.54005	4.53824
NM_032704	TUBA1C	Homo sapiens tubulin, alpha 1c (TUBA1C), mRNA.	1.5444	1.27e-13	2.08979e-09	6.95018	6.96758	6.84234	7.06625	6.44643	6.19162	7.6946	6.07959	6.50853	8.35348	5.55847	6.26193	7.22637	5.5323	6.15704	7.7214	5.98106	7.49446	6.75313	6.56576	6.43689	5.78216	6.33901	5.76803	6.08855	5.54251	5.8164	5.49611	5.91629	6.14138	5.28028	6.12013	6.85709	6.38712	4.85438	7.23175	7.42923	7.25588	5.317	5.57625	7.13042	5.6251	7.22045	6.12403
NM_152417	TMEM68	Homo sapiens transmembrane protein 68 (TMEM68), mRNA.	1.5442	5.19e-19	8.54014e-15	5.29675	5.8084	5.60453	5.48052	5.67299	5.53241	5.44831	4.69204	5.88624	5.67571	5.36943	3.9432	3.70543	4.42894	3.95578	3.97112	4.14444	3.97639	3.92281	3.8063	3.92817	3.85193	4.15594	4.403	3.71772	3.49774	4.28497	4.25403	4.39345	4.44907	3.94091	3.9435	4.95492	5.09065	4.98057	5.11071	5.16888	4.99021	4.44086	4.60096	4.59678	4.0215	4.32341	3.42263
NM_181873	MTMR11	Homo sapiens myotubularin related protein 11 (MTMR11), mRNA.	1.54416	6.12e-10	1.00705e-05	5.71762	6.48507	6.19165	6.1258	5.99549	6.11159	6.0468	5.55767	5.50561	6.13757	5.49012	4.34867	5.48827	4.62951	4.90866	5.35414	4.79415	5.56172	4.2144	4.71253	4.49257	4.56752	4.27025	4.72703	5.13759	4.33564	4.65996	4.57877	4.71321	4.28049	4.61317	4.24716	4.56733	5.2074	4.80977	5.22563	5.25709	4.81405	5.02707	4.73782	4.9998	5.61808	4.68505	4.23477
NM_021204	ENOPH1	Homo sapiens enolase-phosphatase 1 (ENOPH1), mRNA.	1.54408	1.97e-11	3.24164e-07	6.74638	7.80421	7.19604	7.04556	7.20369	7.08983	7.16483	6.18748	7.39252	7.63871	7.16261	6.24501	6.03569	6.38519	7.10799	7.22011	6.83292	6.33934	6.35956	6.77334	7.09604	6.99936	6.67877	6.90382	5.56905	4.63453	6.56486	5.67775	6.54396	6.29567	6.20483	5.50796	6.60871	7.23619	6.40641	7.17381	7.16753	7.34304	6.19224	7.17357	7.24104	5.8356	5.24605	5.45603
NM_022451	NOC3L	Homo sapiens nucleolar complex associated 3 homolog (S. cerevisiae) (NOC3L), mRNA.	1.54405	1.16e-12	1.90878e-08	3.8811	4.47267	4.26668	4.00964	3.90053	4.58506	4.36994	3.00629	3.73443	4.08025	3.68143	2.31515	2.26279	2.10482	2.60165	2.64303	2.61942	2.16618	2.25352	1.96071	2.36302	2.44278	2.30922	2.27928	2.72988	1.82149	3.17841	3.13144	2.68514	2.44037	2.22541	1.87303	2.54818	3.02661	2.76973	3.34669	3.12156	2.80578	3.09105	3.10406	2.57764	2.0452	2.14198	1.70485
NM_032458	PHF6	Homo sapiens PHD finger protein 6 (PHF6), transcript variant 2, mRNA.	1.54401	5.07e-15	8.34268e-11	4.8332	5.55247	5.56769	5.57429	5.83814	5.52261	5.70788	4.15667	5.3621	6.10177	4.88844	4.24689	4.52574	4.44189	4.82644	4.95624	4.94281	4.83668	4.08204	4.48281	4.70985	4.41888	4.72315	4.39528	4.32264	3.19414	4.26838	4.52616	4.36174	4.7535	3.98515	4.47915	5.21402	4.90415	4.76088	5.09246	4.94937	4.68406	4.52775	5.3213	5.18179	4.55882	4.36795	4.30736
NM_003137	SRPK1	Homo sapiens SFRS protein kinase 1 (SRPK1), mRNA.	1.54353	7.46e-12	1.22754e-07	7.03893	7.52189	7.17368	7.00609	6.67023	7.19315	7.5432	4.68294	6.55122	6.96943	5.72894	5.2437	5.75285	5.31409	5.83739	6.06763	6.28462	5.83006	4.99293	5.45034	6.26986	5.81702	5.63865	5.74569	5.84232	3.52227	6.01789	4.73822	5.72457	5.06456	5.1772	4.65418	5.80793	6.9719	5.99949	7.05075	6.85309	6.30009	5.86113	7.13754	6.50004	6.11629	4.8797	5.19645
NM_002703	PPAT	Homo sapiens phosphoribosyl pyrophosphate amidotransferase (PPAT), mRNA.	1.54298	1.8e-14	2.9619e-10	4.1718	4.26515	4.44328	4.17837	4.19537	4.34114	4.5124	3.93291	4.55784	4.87522	4.01792	2.75442	2.355	2.572	2.9371	2.599	2.79442	2.35468	2.37023	2.74292	2.90726	3.02406	2.57105	3.08669	3.49797	2.56094	3.05284	3.16084	3.07389	3.03464	3.00807	2.59262	3.91947	4.02964	3.47768	3.74037	3.65773	3.57965	3.49366	4.20075	3.80266	3.24666	3.61836	3.1696
NM_003769	SFRS9	Homo sapiens splicing factor, arginine/serine-rich 9 (SFRS9), mRNA.	1.54274	1.8e-10	2.9619e-06	8.73333	9.69979	9.30173	8.8874	9.08322	9.05346	9.14909	7.78201	9.2105	9.18414	8.77407	8.53222	7.84571	9.03051	8.43921	8.54903	8.03157	7.71345	7.94154	8.42508	8.76796	8.04171	8.24366	8.80036	8.19067	5.01009	9.00473	7.50827	8.12831	7.27202	7.77463	7.22972	8.0355	9.06997	8.68451	8.78805	8.81777	9.15759	7.84452	9.30059	8.53061	8.82885	5.58654	6.62259
NM_018085	IPO9	Homo sapiens importin 9 (IPO9), mRNA.	1.54265	6.71e-14	1.10413e-09	6.77787	7.90074	6.77981	6.82925	7.12069	7.09129	6.88291	5.24429	6.7566	6.64467	6.37864	5.90218	5.73437	5.28209	6.09514	6.17749	5.91024	5.90123	5.89438	5.75997	6.18722	6.35526	5.30963	5.88482	5.67539	4.18688	6.27728	4.97528	6.11352	5.48039	5.31805	4.80027	5.94345	6.44687	5.90613	6.57401	6.45855	6.50587	6.57547	6.53019	6.20936	5.59584	5.21376	5.4789
NM_007266	XAB1	Homo sapiens XPA binding protein 1, GTPase (XAB1), mRNA.	1.54254	8.74e-10	1.43817e-05	6.65108	7.39586	7.33914	6.97222	7.36777	6.93314	6.91205	5.62825	7.0133	7.66864	5.72158	6.27732	5.66411	6.20386	6.41854	6.4638	6.40814	5.66091	5.93952	6.30976	6.4063	6.4118	6.35924	6.51437	5.74247	2.38124	6.31085	5.27878	6.14055	5.88042	6.25323	5.96129	6.20206	6.61159	5.86371	6.51566	6.51072	6.38169	5.35712	7.15137	6.94206	6.03641	4.88256	5.26679
NM_080660	ZC3HAV1L	Homo sapiens zinc finger CCCH-type, antiviral 1-like (ZC3HAV1L), mRNA.	1.54201	2.74e-14	4.50867e-10	5.51285	6.47429	6.12558	6.09926	6.95783	6.02936	6.20132	4.7838	5.86404	5.95329	5.67856	4.535	4.73023	4.38836	4.88894	4.31947	5.33314	5.07264	4.62174	4.95746	4.7852	4.74398	4.75619	4.63336	4.45906	3.86605	5.13561	4.06767	4.90903	4.17873	4.2423	5.01888	4.62143	4.84403	4.69116	4.69082	5.04048	4.36585	4.63457	4.60885	5.01781	4.65304	4.66648	4.26052
NM_024322	CENPO	Homo sapiens centromere protein O (CENPO), mRNA.	1.542	3.12e-16	5.13396e-12	4.76441	4.879	4.40322	4.57046	4.28996	4.42844	4.07749	4.27284	4.27532	4.88938	4.35238	3.16015	3.73212	3.19292	3.3258	3.45807	3.20736	3.50669	3.20858	3.33484	3.04547	3.7097	3.18629	3.51865	3.33443	3.20598	3.43341	2.57689	2.68875	2.70955	2.66233	3.05889	3.27279	4.04026	3.64719	3.65206	3.25968	3.42115	2.86737	3.60175	3.7062	3.29513	3.34165	3.5599
NM_001033	RRM1	Homo sapiens ribonucleotide reductase M1 polypeptide (RRM1), mRNA.	1.54191	1.57e-15	2.58344e-11	6.35576	6.93716	6.83613	6.46469	6.38979	6.85966	6.76601	5.11069	6.31256	6.70172	5.46027	5.84413	5.40204	5.46466	5.65294	5.34696	5.36215	5.67537	5.52835	5.45642	5.68742	5.58814	5.40662	4.96501	5.3774	3.25	5.71295	5.08471	5.44689	5.53218	5.31378	4.94199	6.08724	5.94596	5.34402	6.17906	5.86379	5.7449	5.03697	6.02861	6.40907	5.46175	4.45477	5.22438
NM_005531	IFI16	Homo sapiens interferon, gamma-inducible protein 16 (IFI16), mRNA.	1.54051	1.03e-07	0.00169487	6.15958	7.61345	7.57766	6.57805	7.90515	6.93296	7.11291	5.24555	6.17072	6.78288	6.01779	5.80199	5.32186	5.48295	6.17972	6.50004	7.15046	5.65049	5.56768	5.61719	5.71742	5.9726	6.17284	6.44362	5.78263	3.12502	7.23744	6.03803	6.2764	6.19822	5.71223	5.2294	6.12976	6.40414	6.00195	6.30937	6.83536	6.19347	6.37297	6.59741	6.5526	5.22594	4.06712	5.29204
NM_002388	MCM3	Homo sapiens minichromosome maintenance complex component 3 (MCM3), mRNA.	1.54017	2.13e-18	3.50492e-14	6.19513	6.77659	6.2708	6.12602	5.96614	6.26175	6.14638	5.45252	5.80957	5.56811	5.72795	4.49965	4.9396	4.93041	4.81214	4.94017	5.069	5.08986	4.64159	5.0602	4.91108	4.80903	4.62269	4.82335	5.05495	4.33736	5.08178	4.79655	4.78475	5.02379	4.72671	4.52454	5.05677	5.7405	5.09007	5.63757	5.55091	5.44888	4.6688	5.41863	5.31372	5.17723	4.75996	4.50995
NM_007223	GPR176	Homo sapiens G protein-coupled receptor 176 (GPR176), mRNA.	1.54	5.05e-14	8.30977e-10	5.10834	4.81903	4.97655	5.12527	5.31789	5.24334	5.10234	5.14389	4.9067	5.25497	4.63439	3.93492	3.71208	3.65423	3.98592	3.8491	3.95335	3.84283	3.53092	3.61875	3.40856	3.4192	3.47177	3.19577	3.71353	3.61317	3.69463	3.17761	3.60434	3.17367	3.40893	3.53847	3.36951	3.37198	3.45027	3.40019	3.40719	3.17296	3.20975	3.34726	3.34124	3.52681	3.84272	3.30633
NM_018290	PGM2	Homo sapiens phosphoglucomutase 2 (PGM2), mRNA.	1.53968	5.26e-15	8.65533e-11	6.48862	7.76961	7.29573	6.93139	7.36521	7.42449	7.0463	5.68495	6.41749	6.80491	5.65752	5.10075	5.59517	5.52766	5.98406	6.2237	6.25133	5.77911	4.66589	5.62249	5.27722	5.56093	5.54883	5.88521	5.40597	4.00703	6.21983	5.50598	5.79857	4.97783	5.76159	4.58274	5.61592	6.28092	4.99302	6.50234	6.46533	5.89452	6.23534	6.52384	5.96992	5.14604	4.74458	5.03728
NM_003258	TK1	Homo sapiens thymidine kinase 1, soluble (TK1), mRNA.	1.53933	1.05e-13	1.72778e-09	6.87284	6.41935	6.41939	6.79582	6.09228	6.31726	6.54922	6.31825	6.77558	6.57694	6.84231	5.61144	6.20922	5.34572	5.71688	5.2039	4.99788	6.15357	5.62053	6.10998	5.78657	5.71764	5.21487	5.03522	5.78581	5.6864	5.48489	5.51671	5.14251	5.65864	5.70797	5.51048	5.75689	6.22797	5.89267	6.13595	5.64913	5.934	5.62756	5.67147	6.14728	5.88858	5.31035	5.67147
NM_005282	GPR4	Homo sapiens G protein-coupled receptor 4 (GPR4), mRNA.	1.53933	8.71e-11	1.43323e-06	5.88403	5.12877	5.34935	5.43127	5.81455	5.4977	5.76436	5.45941	5.04415	5.92129	5.58943	4.71756	4.53991	4.06929	4.19213	3.91564	4.14741	3.81264	3.19703	3.83388	3.68022	4.19231	3.76811	3.79132	4.19519	2.99927	4.53853	3.98809	4.02919	4.27942	4.62725	4.44735	3.8429	4.30838	4.31005	4.39018	4.1375	4.24139	4.33062	3.6591	3.85663	4.35847	4.36224	4.14501
NM_014660	PHF14	Homo sapiens PHD finger protein 14 (PHF14), transcript variant 2, mRNA.	1.53909	9.58e-14	1.57639e-09	5.08343	6.59481	6.12682	6.03705	6.10348	6.36864	6.07048	4.59561	6.19472	6.12167	6.22403	5.00258	4.73077	4.77115	5.21225	5.21673	5.547	4.95763	4.35089	4.55158	4.92902	5.22327	4.59456	5.11989	4.99005	4.12645	5.78168	5.05959	5.35749	5.1828	4.79156	4.88317	5.06489	5.89309	5.45626	5.45284	5.48198	5.24798	6.27977	5.4461	5.23401	4.42736	4.38793	4.32745
NM_000245	MET	Homo sapiens met proto-oncogene (hepatocyte growth factor receptor) (MET), mRNA.	1.53871	2.71e-09	4.45931e-05	6.45348	6.76212	6.37142	6.63535	5.93621	6.289	6.3131	5.39283	6.40377	6.98586	5.5235	5.445	5.17957	5.28277	5.56559	5.71349	4.97772	5.36509	4.78381	4.61606	5.37038	5.32168	4.96501	4.78833	5.65805	3.92816	6.22257	4.7329	5.1184	5.50414	4.78756	5.05907	5.80325	6.25945	5.9635	6.39826	6.51667	5.96649	4.52418	5.91979	6.25461	5.27258	5.2555	4.85748
NM_153712	TTL	Homo sapiens tubulin tyrosine ligase (TTL), mRNA.	1.53868	1.76e-15	2.89608e-11	6.4986	6.78682	6.34834	6.33089	7.12377	6.50045	6.29404	5.67589	6.47035	7.07513	6.4145	5.52823	5.47852	5.39111	5.61815	5.47457	5.91681	5.49839	5.26783	5.5918	5.55688	5.65601	5.19611	5.91402	5.42724	4.61501	5.91127	5.95036	6.27708	5.65005	5.78556	5.43348	6.09537	5.99079	5.99785	6.06044	6.01177	5.85777	6.37593	5.88747	5.65179	5.50847	5.24612	5.15289
NM_002349	LY75	Homo sapiens lymphocyte antigen 75 (LY75), mRNA.	1.53778	1.4e-10	2.3037e-06	5.34974	5.87921	6.08342	5.54357	5.85547	5.69387	6.03788	4.57819	5.45442	5.84516	5.49172	4.55459	5.14094	4.58715	4.62643	4.9042	5.33166	5.35731	3.89366	4.29942	4.34619	4.35289	3.94149	4.75078	4.89879	3.22501	4.49229	3.91795	4.43822	4.48337	3.84904	4.56149	4.87658	5.63964	4.21243	5.14707	5.71475	4.9768	4.45451	5.8599	5.27763	5.30218	4.27596	4.04353
NM_005414	SKIL	Homo sapiens SKI-like oncogene (SKIL), mRNA.	1.53752	3.84e-10	6.31872e-06	6.22614	6.68121	6.96536	6.17464	6.65976	6.64377	6.68997	5.27678	6.02436	7.20951	5.37121	4.43273	4.28418	4.53527	4.89505	4.95304	5.2147	4.70695	4.1511	4.97353	5.32906	4.91786	5.14842	5.83078	5.74946	2.99122	6.7072	5.6082	5.53402	5.90605	4.71527	5.37729	5.95264	6.56945	5.78151	6.43678	6.48852	5.82292	6.09196	6.44322	6.05337	5.82042	4.95417	4.36512
NM_000310	PPT1	Homo sapiens palmitoyl-protein thioesterase 1 (ceroid-lipofuscinosis, neuronal 1, infantile) (PPT1), mRNA.	1.53693	1.32e-09	2.17206e-05	7.90848	9.04796	8.68516	8.37589	8.73025	8.54665	8.50827	6.23586	7.87313	7.94065	6.91866	7.57583	6.63892	7.23113	8.23074	8.00017	7.53158	6.77337	7.4196	7.71868	7.64658	8.21864	7.51063	7.71731	6.95819	3.73932	6.92569	6.45456	7.7814	6.6265	6.88003	6.3907	7.37354	8.11731	7.0705	7.93714	8.2119	7.67796	7.56931	8.33975	8.33975	7.41478	6.75148	6.29896
NM_018431	DOK5	Homo sapiens docking protein 5 (DOK5), mRNA.	1.53683	7.8e-09	0.000128349	3.88246	3.51945	3.66217	3.43933	4.413	3.96354	3.80358	3.73497	3.40655	4.54424	4.15716	3.02037	2.35365	2.95253	2.93082	2.51176	2.92982	2.74801	2.89454	2.73878	2.7756	3.22328	2.90576	3.16581	2.8246	2.75529	2.27967	2.60191	2.26646	1.75352	2.35286	2.64221	2.72821	2.52812	2.39142	2.87284	2.81992	2.32583	2.84525	2.52036	2.49262	2.7769	3.18242	2.51225
NM_001032283	TMPO	Homo sapiens thymopoietin (TMPO), transcript variant 2, mRNA.	1.53682	1.09e-15	1.79359e-11	5.91526	6.27346	6.62993	6.43507	6.90368	6.43967	6.45026	5.5631	6.06373	7.02019	5.58299	4.76771	5.00499	5.61466	5.13752	4.40539	5.34186	4.84657	4.74283	5.4139	5.35852	5.15162	5.48655	5.07525	5.0038	3.64292	4.73982	4.88987	5.29287	5.55137	4.90167	4.5182	5.89679	6.20658	5.4077	6.10616	6.20233	5.75831	4.65222	6.52173	6.01587	6.08329	4.61565	4.33247
NM_003842	TNFRSF10B	Homo sapiens tumor necrosis factor receptor superfamily, member 10b (TNFRSF10B), transcript variant 1, mRNA.	1.53674	1.3e-17	2.13915e-13	6.24677	6.10429	6.20456	6.23014	6.20819	6.15763	6.13965	5.6863	5.64821	6.37275	6.49728	4.71162	5.02942	4.83867	4.88936	4.97818	5.30163	5.25369	4.54548	4.78356	4.80737	4.64714	4.94804	4.74944	5.40776	4.28705	5.46558	4.27927	4.66365	4.63936	4.61427	4.32493	5.56003	5.51492	5.12616	5.4667	5.52371	5.14975	5.42018	4.94016	5.62999	5.33704	4.89954	4.55349
NM_018248	NEIL3	Homo sapiens nei endonuclease VIII-like 3 (E. coli) (NEIL3), mRNA.	1.53662	3.69e-12	6.0719e-08	4.60003	5.05581	4.80591	4.5337	4.6665	4.48183	4.70812	4.65195	4.03422	4.03548	4.55004	3.16419	3.07951	3.04958	3.18992	4.13561	3.71194	3.42468	2.96022	3.63969	3.40457	3.56365	3.53479	4.38929	3.7154	3.47601	3.43493	2.91185	3.16914	3.20558	3.04241	2.60829	2.87188	3.44706	3.14601	3.55015	3.26396	3.25635	3.57919	3.40949	2.99713	2.9992	3.24977	2.82405
NM_024053	CENPM	Homo sapiens centromere protein M (CENPM), transcript variant 1, mRNA.	1.53612	9.94e-15	1.63563e-10	6.55086	6.14887	6.02569	6.32953	5.8569	5.65844	6.26771	6.3855	5.92074	6.75291	6.96012	5.26571	6.1621	5.62637	5.49957	5.88893	5.70026	6.0158	5.01901	5.35808	5.35999	5.12932	4.95678	5.428	5.00904	5.25033	5.26837	4.91122	5.13895	5.68309	5.82937	5.34415	5.57613	6.18098	5.98669	6.28829	5.77832	5.63324	5.29109	5.62866	6.06117	5.86238	6.20844	5.96051
NM_020531	C20orf3	Homo sapiens chromosome 20 open reading frame 3 (C20orf3), mRNA.	1.53602	3.91e-12	6.43391e-08	6.91028	6.90225	7.40147	6.7895	7.26373	6.93939	6.93502	6.46784	6.67853	6.90238	6.63552	6.31211	6.33421	5.91683	5.99421	6.01775	6.32332	6.14068	5.89304	5.71972	6.08354	5.86176	6.37582	6.22738	7.64333	4.53712	7.36097	5.60529	6.37962	5.56004	5.6223	5.69653	6.24068	6.42615	6.05288	5.96695	6.43899	6.41606	5.60877	6.43735	6.1526	6.56104	6.52168	5.24387
NM_030643	APOL4	Homo sapiens apolipoprotein L, 4 (APOL4), transcript variant a, mRNA.	1.53585	2.63e-12	4.32766e-08	5.74194	5.99097	6.19747	6.13134	6.97611	5.96913	6.21321	5.61691	4.9635	6.74545	5.83854	4.74866	4.37532	4.39148	4.74844	5.24164	5.10116	4.35031	5.06755	4.61437	4.76665	4.51208	4.64384	5.48241	5.3543	4.25289	5.5151	4.58789	4.97178	4.71853	4.562	4.5474	5.19642	5.22103	5.10864	4.64462	5.78212	5.13627	4.54232	4.6283	5.1214	4.39068	4.41691	4.26091
NM_012229	NT5C2	Homo sapiens 5'-nucleotidase, cytosolic II (NT5C2), mRNA.	1.53582	9.52e-12	1.56652e-07	7.53433	8.07928	8.08858	7.66954	7.69695	8.14943	7.86252	5.72104	7.39886	7.83828	6.97765	6.22059	6.32259	6.02372	6.72523	6.86147	6.691	6.60458	5.81342	6.5128	6.81817	6.54561	7.00547	6.86915	6.92186	3.56996	7.10835	6.41918	7.07307	6.40775	6.24675	6.26118	7.55831	7.32365	6.90548	7.70821	7.66411	7.53868	7.11837	7.25821	7.20963	6.34266	6.07001	5.7877
NM_006622	PLK2	Homo sapiens polo-like kinase 2 (Drosophila) (PLK2), mRNA.	1.53555	3.63e-09	5.97316e-05	5.83476	6.2941	6.05528	5.36929	6.01805	5.31736	5.77561	4.66535	5.42593	6.24936	5.40413	4.59297	4.23966	4.06235	4.7561	4.43917	4.65254	4.19626	4.07228	4.57238	4.33618	4.94981	4.23545	4.88648	4.92535	3.77176	6.14769	4.46737	5.58757	4.60015	4.74315	3.69007	4.79694	4.86795	4.44055	5.10411	4.31852	4.80828	4.45699	5.64481	6.0574	4.36163	3.67945	4.08384
NM_001018137	NME2	Homo sapiens non-metastatic cells 2, protein (NM23B) expressed in (NME2), transcript variant 2, mRNA.	1.53551	7.32e-08	0.00120451	8.1796	7.72743	8.2081	8.07752	8.371	7.93906	7.55581	8.29198	7.7162	9.39882	7.85457	7.1323	8.36192	7.30029	7.92959	6.44471	7.51974	8.21075	7.3269	7.772	7.13628	7.52579	7.8269	7.36239	7.51376	6.18214	7.00217	6.26259	7.04416	6.38396	8.01884	7.93631	8.16729	7.4261	7.3163	7.32224	7.45543	7.46277	6.32755	7.35207	8.0191	8.13355	5.17684	6.65213
NM_001017967	MARVELD3	Homo sapiens MARVEL domain containing 3 (MARVELD3), transcript variant 1, mRNA.	1.53497	1.28e-09	2.10624e-05	6.81892	6.30612	6.57094	6.96871	6.33083	6.89858	6.91809	6.65299	7.12173	6.96822	6.73866	5.57269	6.33716	5.95405	5.61198	5.39695	5.47394	6.43937	5.58218	5.47946	5.64194	5.59384	4.82531	5.62697	5.76407	5.86758	5.52642	6.44825	5.85213	5.49401	5.77684	6.33594	6.06201	5.55737	5.89581	5.8381	5.95233	5.95006	5.9832	5.2061	5.54762	5.78399	5.75695	5.72187
NM_015261	NCAPD3	Homo sapiens non-SMC condensin II complex, subunit D3 (NCAPD3), mRNA.	1.5346	2.77e-15	4.55804e-11	5.49362	5.94955	5.61987	5.74623	5.61461	5.88428	5.90139	5.05023	5.95333	5.86213	5.58444	4.85656	4.6588	4.59675	4.69466	4.76381	4.38521	4.75723	4.95038	4.5484	4.64351	4.71404	4.29277	4.54956	4.68144	3.60788	4.58753	4.12951	4.48283	4.46756	4.07372	4.01622	4.91153	5.17609	4.93534	5.49946	5.14318	5.25338	4.89963	4.52115	4.79786	4.60795	4.41559	4.02497
NM_152475	ZNF417	Homo sapiens zinc finger protein 417 (ZNF417), mRNA.	1.53437	7.54e-07	0.0124071	5.26393	5.49203	5.45975	5.50563	5.68101	5.40968	5.47181	4.9016	5.27397	6.24956	5.88983	3.63522	4.2476	4.505	4.74084	4.38812	4.33294	4.54934	3.41039	3.94296	4.1632	4.48719	4.76849	4.74805	3.66549	2.25134	3.95041	3.77383	4.72958	4.90325	4.15791	4.48493	5.27615	4.64649	4.37025	4.58942	4.55743	4.42852	5.03921	5.45148	5.20267	4.16396	5.40447	3.73717
NM_017760	NCAPG2	Homo sapiens non-SMC condensin II complex, subunit G2 (NCAPG2), mRNA.	1.53427	2.38e-16	3.91629e-12	4.96866	5.38628	5.16263	4.98097	4.80314	5.02522	5.177	4.55641	4.98839	4.92886	4.95219	3.67866	3.74488	3.7036	3.51411	3.84484	4.20292	4.0192	3.1698	3.64115	3.63722	3.47542	3.29132	3.85265	3.80237	3.36972	4.25831	3.62923	3.82444	3.71474	3.70047	3.43551	3.95846	4.22651	4.06002	4.33511	4.07748	3.95696	3.92456	3.99632	4.07835	3.62334	3.5184	3.3476
NM_006429	CCT7	Homo sapiens chaperonin containing TCP1, subunit 7 (eta) (CCT7), transcript variant 1, mRNA.	1.53377	3.22e-14	5.29851e-10	9.20291	9.71611	9.47998	9.23784	9.31047	9.57567	9.44988	7.8479	8.95966	9.51706	8.17984	8.2868	8.35723	8.57364	8.7005	8.23589	8.40845	8.59507	8.23321	8.70381	8.3473	8.55203	8.2153	8.54938	8.24623	5.62282	8.44045	7.25788	8.3863	7.56635	8.17614	7.80806	8.5935	9.15466	8.4736	8.83564	8.75012	9.17692	8.48745	8.50889	8.52468	8.32031	7.6113	7.23489
NM_014584	ERO1L	Homo sapiens ERO1-like (S. cerevisiae) (ERO1L), mRNA.	1.53351	6.02e-11	9.90591e-07	7.33564	7.50234	7.89188	7.78183	7.18869	7.52372	7.99431	5.98814	7.72286	7.99779	6.25826	6.16415	6.15165	6.91741	6.85308	6.66785	5.66309	6.44862	5.9458	6.57247	6.81661	6.82145	6.7714	6.28887	6.42201	4.29147	6.59665	5.75007	6.67111	6.62683	6.0758	5.98647	6.96516	7.53646	6.7735	7.65113	7.56741	7.33158	5.53265	7.50104	7.44738	6.54918	5.72361	5.50769
NM_005985	SNAI1	Homo sapiens snail homolog 1 (Drosophila) (SNAI1), mRNA.	1.5334	2.93e-08	0.000482132	5.37184	4.82358	4.92602	4.8931	4.71094	4.93405	4.70327	4.64769	4.64162	5.18258	4.78666	5.04334	4.59496	3.98386	3.7356	3.32721	4.68463	4.25557	4.54544	3.63364	2.67895	3.45049	3.60122	3.29775	4.09333	3.77973	4.23651	3.72302	3.21184	2.91343	3.60498	2.67287	3.195	3.00753	4.13029	4.51766	4.56397	3.27856	3.06405	3.22818	4.32438	3.05549	3.81105	3.95656
NM_152720	NEK3	Homo sapiens NIMA (never in mitosis gene a)-related kinase 3 (NEK3), transcript variant 2, mRNA.	1.5333	4.75e-12	7.81613e-08	4.5995	5.44754	5.3794	5.10532	5.18963	5.50889	5.14252	4.64487	5.5062	5.59491	5.29273	3.73627	3.93478	3.90573	4.00648	3.77378	4.64966	4.40758	4.03439	3.98768	4.08345	4.09996	4.607	4.07103	4.19427	3.52738	3.65259	3.5315	3.69582	3.88169	3.52734	3.84389	4.21232	3.9407	4.06954	3.91349	3.85569	4.35409	4.0148	4.43973	4.64028	3.89854	5.05753	3.68904
NM_153695	ZNF367	Homo sapiens zinc finger protein 367 (ZNF367), mRNA.	1.53327	1.32e-12	2.17206e-08	5.47821	5.13083	5.10905	5.38585	5.08554	4.89559	5.4726	5.23395	5.6321	5.93863	6.54468	5.11666	5.37028	4.85083	4.92675	4.7469	4.91319	5.2417	4.53526	4.19145	4.29277	4.13482	4.3791	4.3848	4.25314	4.77546	3.8296	4.44799	4.10769	3.86515	4.60716	4.67436	4.98668	4.91888	4.83251	4.78896	4.81672	4.8787	4.78	4.27658	4.14829	4.43745	4.04909	4.33188
NM_032208	ANTXR1	Homo sapiens anthrax toxin receptor 1 (ANTXR1), transcript variant 1, mRNA.	1.5328	4.8e-10	7.8984e-06	6.9913	8.14949	7.14926	7.35915	8.68526	7.98349	7.21431	6.57112	6.86655	7.33694	6.38777	6.34457	6.11042	5.65123	6.54641	6.16609	6.97361	6.1843	6.1479	6.16927	5.95044	6.39836	5.74143	6.7146	6.45463	4.04474	6.98101	6.64733	6.60876	5.81157	6.48097	6.1594	6.78485	5.68613	5.60671	6.28735	6.42536	6.44988	6.64393	6.24486	6.50444	5.66645	5.90838	5.66613
NM_015507	EGFL6	Homo sapiens EGF-like-domain, multiple 6 (EGFL6), mRNA.	1.53277	1.84e-08	0.000302772	3.78988	3.55697	3.89121	3.61243	4.10316	3.60142	3.67379	3.73965	4.05221	4.13661	4.18941	2.75111	2.6262	2.96075	2.68654	2.59375	2.72469	2.67376	2.96206	3.32245	2.73842	2.70421	3.12911	2.53442	3.35581	3.24158	2.22205	2.32919	2.04624	2.13722	2.1623	3.23768	2.8019	2.38075	2.61745	2.68194	2.49647	2.59749	2.43399	3.33552	3.24233	3.21529	3.85701	2.93999
NM_002485	NBN	Homo sapiens nibrin (NBN), transcript variant 1, mRNA.	1.53265	1.15e-12	1.89233e-08	5.46072	6.48851	5.69294	6.18478	6.561	6.40581	6.23915	4.14792	4.89842	5.84423	4.43969	4.40328	4.14391	4.20223	4.9936	5.04135	5.15528	4.18634	3.9762	4.6123	4.75356	4.4723	4.10167	5.1012	5.06046	2.38444	5.128	4.69049	5.25742	4.56323	4.2428	3.731	5.33383	5.06801	4.48762	5.37305	5.69471	5.19327	5.40706	5.26832	5.13488	4.27961	3.98098	3.56819
NM_016216	DBR1	Homo sapiens debranching enzyme homolog 1 (S. cerevisiae) (DBR1), mRNA.	1.53217	4.98e-11	8.19459e-07	4.85596	5.84284	5.24895	5.14177	5.39894	4.9869	5.19857	4.17425	4.92532	6.05666	5.61532	4.17644	4.45926	4.06372	4.40762	3.99391	4.19695	4.39119	4.29795	4.64401	4.70901	4.92503	4.39174	4.90768	4.26953	3.86278	4.63228	4.07954	4.70563	4.75677	4.54148	4.59603	4.93789	5.24988	4.72442	4.95988	4.81766	4.80211	4.66403	5.0487	5.20383	4.05589	3.9179	4.05589
NM_001042413	GLIS3	Homo sapiens GLIS family zinc finger 3 (GLIS3), transcript variant 1, mRNA.	1.53181	9.36e-07	0.0154019	5.74134	6.0962	5.51774	5.78349	6.18586	5.80425	5.5735	5.73086	5.47569	5.85184	5.93042	4.98166	5.03233	4.82537	4.92716	4.96247	4.93495	4.83958	4.71112	4.57931	4.43104	4.43171	4.50229	4.88948	4.63379	4.46119	4.6784	4.24021	5.73648	4.50416	4.58893	4.33129	4.99077	4.74275	4.85882	5.01027	5.22049	4.88952	6.20042	4.1568	4.74029	4.32311	4.74029	4.66702
NM_018144	SEC61A2	Homo sapiens Sec61 alpha 2 subunit (S. cerevisiae) (SEC61A2), mRNA.	1.53155	2.14e-13	3.52137e-09	4.29626	4.91245	4.57909	4.55071	4.65566	4.72864	4.53265	4.37819	4.85414	4.85137	4.82343	3.47773	3.39545	3.3446	3.48163	3.21598	3.5043	3.52091	3.32234	3.45641	3.38516	3.51536	3.50033	3.69694	3.88013	3.52965	3.71596	3.64219	3.5945	3.10282	3.52462	3.7281	3.57909	3.27359	3.3561	3.24398	3.30106	3.3792	3.83293	2.86506	3.27721	2.85518	3.01253	2.70753
NM_018182	C17orf63	Homo sapiens chromosome 17 open reading frame 63 (C17orf63), transcript variant 2, mRNA.	1.53152	9.06e-11	1.49082e-06	6.87208	7.31578	6.7044	6.91313	7.17687	6.98695	6.5301	6.65598	6.61457	7.7291	7.06304	6.02048	6.5496	5.91021	5.98945	6.04236	6.23192	6.54634	5.7181	5.5376	5.80293	5.40574	5.6108	4.94692	5.16695	5.09397	5.80777	6.00213	5.82747	5.98814	5.27402	5.98058	6.85429	6.5015	6.14276	6.65831	7.20244	6.54965	6.71551	5.99866	6.10602	6.14903	5.81516	6.4232
NM_003211	TDG	Homo sapiens thymine-DNA glycosylase (TDG), mRNA.	1.5315	2.32e-11	3.81756e-07	7.16363	6.70797	7.224	7.47011	6.60734	7.08789	7.39892	5.31315	6.79292	7.22125	7.37914	5.22931	5.13348	5.26493	5.65914	5.30638	5.18714	5.60777	3.69759	5.52792	5.85249	5.76353	5.96581	5.72783	6.07456	3.13318	6.04519	5.60581	6.0378	5.96481	5.60804	5.97614	6.43794	7.02911	6.65307	7.2766	7.21317	6.5744	5.64266	5.54377	5.87826	5.53661	4.85915	4.74569
NM_002640	SERPINB8	Homo sapiens serpin peptidase inhibitor, clade B (ovalbumin), member 8 (SERPINB8), transcript variant 1, mRNA.	1.53107	6.21e-12	1.02186e-07	5.36078	5.16297	5.09004	4.9953	4.84035	4.88459	5.0812	4.48881	4.18174	5.55113	4.41311	3.85695	3.72199	3.34785	3.94429	4.40398	3.95891	3.80644	3.36431	3.68953	3.34231	3.72434	4.11252	3.82659	4.30063	2.62489	4.27972	3.33684	3.42853	3.21868	3.33536	3.49116	4.76157	4.79228	3.6995	5.18349	5.50935	5.00292	4.28858	4.0603	4.79604	3.94319	3.07815	3.1786
NM_014740	EIF4A3	Homo sapiens eukaryotic translation initiation factor 4A, isoform 3 (EIF4A3), mRNA.	1.53043	2.13e-14	3.50492e-10	6.83072	6.9339	7.16154	6.76734	7.54451	7.165	7.09626	5.80678	6.35107	7.42538	5.95596	5.67973	5.96585	6.25828	6.10622	5.82382	6.49686	5.87822	5.64803	6.36464	5.7297	5.75686	6.38253	5.68439	6.88683	4.43004	6.80151	5.21472	5.98698	5.43459	5.84267	5.41641	6.7579	6.23086	5.64131	6.38218	6.28755	6.32907	5.33046	5.85537	6.13611	5.79817	4.88245	5.05413
NM_003796	C19orf2	Homo sapiens chromosome 19 open reading frame 2 (C19orf2), transcript variant 1, mRNA.	1.53039	2.5e-07	0.00411375	6.72938	7.47133	7.30837	7.2171	7.51191	7.52568	7.48297	5.55508	7.05566	7.59359	5.89941	5.99691	5.91678	6.46331	6.69331	6.73648	6.81119	5.91312	6.29369	6.25253	6.39098	6.35452	6.59382	7.71731	6.19724	2.86373	6.24689	6.1593	7.10503	6.79202	6.32097	5.73865	6.46833	6.69205	5.95289	6.64801	6.92606	6.83127	6.04506	7.05816	6.83534	6.12971	6.56867	5.49475
NM_207506	SAMD12	Homo sapiens sterile alpha motif domain containing 12 (SAMD12), mRNA.	1.53019	3.52e-07	0.00579216	4.42713	4.51285	5.00365	4.51925	4.38353	4.65315	4.62706	4.34666	6.0063	5.50068	6.24664	3.35048	3.63087	3.34495	3.99878	3.90834	3.59988	3.59431	3.24304	3.04121	3.94365	3.85636	4.39733	3.18552	3.85466	2.80847	4.1099	3.17582	3.57914	4.16661	3.46168	4.48331	4.3788	4.11178	4.79537	3.61863	4.42449	4.32833	4.72546	4.21252	4.37448	4.33505	2.81245	3.05067
NM_013402	FADS1	Homo sapiens fatty acid desaturase 1 (FADS1), mRNA.	1.53008	5.87e-10	9.65908e-06	6.39077	6.79953	6.1276	6.45003	6.93607	6.7948	6.50474	5.47416	6.22233	6.43483	5.76251	5.44022	5.48941	5.5101	5.14481	5.20737	5.51958	5.43716	5.05519	5.88609	5.26253	4.76682	5.48575	5.55507	5.59131	4.25165	6.06905	5.09778	5.91829	5.23621	5.41347	4.74084	5.8401	5.11669	4.69226	5.64302	5.84564	6.08057	5.77428	4.89067	5.41562	5.19079	5.62283	4.80799
NM_001017963	HSP90AA1	Homo sapiens heat shock protein 90kDa alpha (cytosolic), class A member 1 (HSP90AA1), transcript variant 1, mRNA.	1.53002	7.98e-08	0.00131311	10.3955	10.311	10.6324	10.2292	11.4222	10.6889	10.7065	9.36224	10.2265	11.5737	7.98402	8.25614	8.68137	9.7637	9.20529	9.72714	9.97588	9.32283	8.44981	10.1576	9.50319	9.37606	10.7571	9.95572	10.5797	4.7346	10.6244	10.0763	10.1589	10.1054	10.3876	9.40702	10.3791	10.1186	9.38044	10.7243	10.3914	9.67173	9.22511	10.6435	10.1374	9.62553	8.21	8.7791
NM_006466	POLR3F	Homo sapiens polymerase (RNA) III (DNA directed) polypeptide F, 39 kDa (POLR3F), mRNA.	1.5299	3.41e-13	5.61116e-09	4.76939	5.54869	5.35021	4.86621	5.4473	5.18133	4.86941	4.16278	5.04883	5.55784	4.73597	3.62162	3.44416	3.52773	4.06672	3.36271	3.83641	3.54041	3.34563	3.81416	3.46935	3.97192	3.54438	3.5773	3.03846	2.44724	3.76989	4.57271	4.07172	3.98609	4.17613	3.68628	3.95638	3.96148	3.31003	4.3781	4.3806	4.20685	3.24064	4.35743	4.10694	3.7183	3.18052	3.04183
NM_003772	JRKL	Homo sapiens jerky homolog-like (mouse) (JRKL), mRNA.	1.52985	6.26e-12	1.03008e-07	5.03845	6.02675	6.19273	6.10205	6.17715	6.17887	6.11885	4.53464	5.77295	5.81948	5.49474	4.03382	3.93056	4.85705	4.82107	4.26844	4.8058	4.28808	4.26356	4.39119	4.58533	4.60448	4.65567	4.89952	4.6268	3.3134	4.7856	4.84008	5.69895	4.59372	4.32821	4.16449	5.07376	5.06191	4.77172	5.23964	5.30432	5.15789	4.42707	5.4076	4.81761	3.96567	4.44936	3.67203
NM_004697	PRPF4	Homo sapiens PRP4 pre-mRNA processing factor 4 homolog (yeast) (PRPF4), mRNA.	1.5284	1.16e-15	1.90878e-11	7.01759	7.35204	7.04802	6.90426	6.63279	7.27311	7.24661	6.14166	6.43481	6.8223	6.09023	5.57776	5.38928	5.68917	5.95671	5.54362	5.75239	5.48164	5.42327	5.59266	5.55592	5.59263	5.67716	5.80032	6.05819	4.37976	6.44727	5.73172	6.39094	5.34967	5.43628	5.18898	6.09239	6.52202	5.59523	6.65245	6.61133	6.56153	5.94341	5.83803	5.69272	5.79859	6.29018	5.03394
NM_018004	TMEM45A	Homo sapiens transmembrane protein 45A (TMEM45A), mRNA.	1.52836	5.97e-07	0.00982364	5.33694	6.29987	5.62501	5.40964	7.05928	5.77915	5.48491	4.68811	4.59188	5.60586	4.75624	4.34252	4.45316	4.0668	4.78003	4.38087	4.92349	4.36523	4.35133	4.84734	4.45247	4.53609	4.73242	5.46981	4.28594	3.08848	4.86811	4.96493	6.05054	3.90072	4.90296	3.93095	5.39908	4.51301	4.08884	4.73722	4.26581	4.652	4.77176	4.93264	4.79935	4.61824	4.19959	3.41092
NM_019082	DDX56	Homo sapiens DEAD (Asp-Glu-Ala-Asp) box polypeptide 56 (DDX56), mRNA.	1.52785	2.15e-14	3.53783e-10	6.96732	7.45622	7.07964	6.81536	6.57687	6.98826	6.88541	6.09934	6.99733	7.03726	7.0675	6.19331	6.18876	5.98742	6.64075	6.41288	6.30665	6.34589	6.12645	6.25139	6.37345	6.15956	5.97752	5.68177	5.73695	4.46572	6.27556	5.02708	5.69766	5.45128	5.20858	5.47109	5.93153	6.9965	6.56892	6.69238	6.88863	6.9942	6.53723	6.30217	6.33568	5.81595	5.82837	5.81595
NM_020937	FANCM	Homo sapiens Fanconi anemia, complementation group M (FANCM), mRNA.	1.5276	2.73e-17	4.49221e-13	3.04225	3.7297	3.24026	3.37181	3.42793	3.68823	3.39875	3.16137	3.27818	3.75592	3.70831	1.71246	1.89887	1.83865	1.86302	1.77745	1.89861	1.71136	1.68863	1.75058	1.70048	1.69237	1.52697	1.70702	1.98922	1.47714	1.84223	1.9624	1.94166	1.94427	1.81272	2.33466	2.33338	2.54166	2.50609	2.59147	2.50665	2.3853	2.32411	2.13369	1.86661	1.90895	2.12917	1.21314
NM_032813	TMTC4	Homo sapiens transmembrane and tetratricopeptide repeat containing 4 (TMTC4), transcript variant 1, mRNA.	1.52674	9.74e-11	1.60272e-06	6.47658	6.37968	5.9162	6.10133	5.76157	6.30533	6.16932	5.5254	6.16599	6.20024	5.85277	5.12861	4.51065	4.8321	5.02081	4.74552	4.64058	4.40925	4.84852	4.39522	5.12486	4.77809	4.66638	5.0419	4.49418	3.26481	5.25872	4.39558	5.49033	4.77961	3.8375	4.68923	5.18062	5.91761	5.78678	6.23272	6.38079	6.14792	4.67502	5.23538	4.58146	4.37512	5.09331	3.97159
NM_153688	ZFP1	Homo sapiens zinc finger protein 1 homolog (mouse) (ZFP1), mRNA.	1.52637	7.6e-12	1.25058e-07	4.92677	6.31582	5.6187	5.77334	5.88718	6.00846	5.75337	4.34648	5.11666	5.76099	5.01089	4.30404	4.41985	4.15556	4.2341	4.6095	4.60372	4.33551	3.29104	3.27317	3.55516	3.50805	3.45407	3.31249	3.7792	2.77283	4.43065	4.27217	4.45585	3.90723	3.6505	4.18097	4.53039	4.43191	3.95614	4.62624	4.50822	4.57657	4.75171	4.02649	3.9517	3.07866	3.5971	3.66399
NM_032558	HIATL1	Homo sapiens hippocampus abundant transcript-like 1 (HIATL1), mRNA.	1.5262	5.1e-10	8.39205e-06	7.78756	7.7805	8.05801	8.11454	7.37954	7.81971	8.3366	6.15453	7.6767	7.88048	6.45561	6.84651	6.86306	6.62637	7.15745	7.18992	6.70231	6.79887	6.83803	6.86633	7.39411	7.30077	6.97176	6.86911	7.09136	3.3389	7.19685	5.75679	7.21106	6.73332	6.29758	6.23491	7.53797	7.86754	6.97706	8.02762	8.16535	7.66632	6.01816	7.50882	7.26912	6.96672	5.26405	6.14589
NM_024670	SUV39H2	Homo sapiens suppressor of variegation 3-9 homolog 2 (Drosophila) (SUV39H2), mRNA.	1.52574	1.8e-12	2.9619e-08	4.59573	5.28317	4.87472	4.71143	4.76417	4.86536	4.88714	4.4029	5.03429	4.91322	4.55284	3.1194	2.97176	2.92407	3.16152	3.05589	3.5823	3.09638	3.50981	3.19518	3.46365	3.04282	3.79527	3.54962	3.06287	2.79251	3.06552	3.22615	3.32432	3.29987	3.34342	3.05316	4.0825	3.61995	3.64423	3.88947	3.75443	3.5434	3.60843	3.44239	3.61094	2.93284	3.1057	2.84631
NM_020914	RNF213	Homo sapiens ring finger protein 213 (RNF213), mRNA.	1.52562	2.72e-12	4.47576e-08	7.17538	7.51889	7.58857	7.29396	7.59744	7.55876	7.55001	6.08789	7.4482	7.32335	7.30736	5.71129	6.49739	6.07402	5.98077	6.51448	6.40297	6.61497	5.71305	5.89544	6.42232	5.71625	6.11259	6.29991	7.13077	4.16617	6.78598	5.3974	6.19497	6.57372	6.16222	6.09589	6.65676	7.59688	7.19956	6.68586	6.82409	6.79381	6.51349	6.60816	6.84009	6.70615	5.63231	6.35783
NM_006023	CDC123	Homo sapiens cell division cycle 123 homolog (S. cerevisiae) (CDC123), mRNA.	1.52504	3.13e-13	5.15041e-09	7.14703	7.44516	7.56221	7.35473	8.02782	7.5035	7.43528	6.16871	6.9705	8.09187	6.50559	6.69781	6.34944	6.58136	6.76146	7.38814	7.40895	6.73528	6.38538	6.94826	6.78541	6.59139	7.40844	6.57453	6.23086	4.13428	6.36999	5.9958	6.4487	6.38711	6.68529	5.96516	6.92779	6.65273	5.99364	6.78178	6.78687	6.6646	5.92494	7.33757	7.27329	6.01039	5.84655	5.7153
NM_022550	XRCC4	Homo sapiens X-ray repair complementing defective repair in Chinese hamster cells 4 (XRCC4), transcript variant 3, mRNA.	1.52491	9.99e-13	1.64385e-08	5.18194	6.41961	5.9462	5.45589	6.07201	5.7662	5.65411	4.18317	5.43029	6.52483	4.38961	4.12579	4.47685	4.32301	5.15824	5.55748	4.90818	4.82103	4.52946	5.23097	5.28934	5.32566	4.89612	5.93612	4.91083	2.95689	4.51665	3.78758	4.05317	4.01368	4.19038	3.82809	4.53256	5.11217	4.52516	5.33129	4.92974	5.31893	3.98961	5.99768	5.81036	4.34276	3.20985	3.317
NM_000416	IFNGR1	Homo sapiens interferon gamma receptor 1 (IFNGR1), mRNA.	1.5248	3.38e-09	5.56179e-05	6.93731	7.6727	7.7861	7.30842	8.72432	7.6285	7.51298	4.95313	7.40557	7.85596	5.82858	6.42067	6.39668	6.65836	7.21163	7.17392	7.65698	6.47261	5.93926	7.06107	6.86742	6.82389	6.80388	7.17296	6.61384	3.6032	6.86748	6.16408	6.55891	6.47564	5.96765	6.12587	7.23218	7.31418	6.09993	6.70061	6.84837	6.50493	6.12667	7.70721	7.37168	6.234	4.88567	5.21246
NM_005412	SHMT2	Homo sapiens serine hydroxymethyltransferase 2 (mitochondrial) (SHMT2), mRNA.	1.52474	5.42e-14	8.91861e-10	7.9162	7.46568	8.25375	7.79779	7.38084	7.60992	7.86994	6.5475	7.90858	7.77231	7.07027	6.86506	7.16889	6.99933	7.34894	6.69049	6.43592	7.30668	6.67521	7.03066	6.72171	7.05626	6.91415	6.5184	6.01372	5.08796	6.49441	5.03072	6.58138	6.01074	6.4936	6.33925	7.45635	7.80135	7.38681	7.46893	7.61066	7.67823	5.93977	7.29131	7.37873	7.24427	6.32117	6.36345
NR_002976	SNORA44	Homo sapiens small nucleolar RNA, H/ACA box 44 (SNORA44) on chromosome 1.	1.52474	5.57e-13	9.16543e-09	5.97559	6.56804	6.72945	6.06538	6.30407	5.93977	6.00804	5.72908	6.05188	6.59825	6.39345	5.19026	5.70976	5.30839	5.86825	5.9324	5.71652	5.75824	5.3159	5.34456	5.40467	5.55996	5.18064	5.61941	5.715	4.18078	6.46011	4.66441	5.1177	5.51637	5.16676	5.1321	5.50328	5.97316	5.41958	5.89562	5.53714	5.2103	5.80905	5.65748	6.39539	5.31292	4.04772	4.6916
NM_206825	GNL3	Homo sapiens guanine nucleotide binding protein-like 3 (nucleolar) (GNL3), transcript variant 2, mRNA.	1.52467	5.58e-13	9.18189e-09	6.41913	6.73893	6.79564	6.43607	6.578	6.08068	6.34545	5.6463	6.6191	7.66405	6.07845	5.53063	5.4898	5.5239	6.2103	5.8954	6.0617	5.48529	5.39116	5.81608	5.89586	5.99939	6.30922	6.03243	5.48225	4.08388	6.61711	5.44647	5.8518	5.50922	5.62108	5.36679	6.18138	6.02658	5.52251	5.9634	6.07741	5.8736	5.52052	7.07521	6.70542	5.63009	5.33677	5.1553
NM_004275	MED20	Homo sapiens Trf (TATA binding protein-related factor)-proximal homolog (Drosophila) (TRFP), mRNA.	1.52427	2.06e-14	3.38973e-10	6.19835	6.70496	6.28247	6.16865	5.71899	6.21159	6.28738	5.41481	5.6134	6.11479	5.66563	4.3267	4.64051	4.46961	4.91884	4.83837	4.07966	4.83009	4.63495	5.1499	5.24994	4.9778	4.91217	4.89141	4.95646	4.18231	4.97386	4.43006	5.16249	4.41888	4.18816	4.40026	3.91767	5.5282	5.46034	5.74608	5.77198	5.46257	4.99581	5.63165	5.73864	5.41656	5.06087	4.64321
NM_004398	DDX10	Homo sapiens DEAD (Asp-Glu-Ala-Asp) box polypeptide 10 (DDX10), mRNA.	1.52418	7.29e-13	1.19957e-08	5.90632	6.33068	6.02408	6.10448	6.13744	6.28783	6.3459	4.24384	6.3064	6.04629	4.9822	5.4408	4.6902	5.0175	5.26809	5.38423	5.85222	4.71094	5.06776	4.55222	5.18189	5.17675	5.2611	5.16018	5.18462	3.8672	5.34328	5.08123	5.12065	4.74009	4.57314	4.67862	5.30096	5.57626	5.05574	5.75983	6.11391	5.71543	5.55071	5.23939	4.88455	4.39212	3.69764	3.90416
NM_000135	FANCA	Homo sapiens Fanconi anemia, complementation group A (FANCA), transcript variant 1, mRNA.	1.52401	3.66e-15	6.02253e-11	5.43496	5.33275	5.34579	5.4047	5.22582	5.01434	5.5129	5.32329	5.07273	5.55693	5.83938	4.48749	4.56879	4.4527	4.49226	4.47126	4.49793	4.50739	4.20013	4.08046	4.38019	4.11414	4.32811	4.24934	4.64773	4.18775	3.98431	3.56658	3.85003	3.91389	3.93398	4.16829	4.05724	4.55318	4.40425	4.63793	4.35626	4.27505	3.97304	4.19701	4.45812	4.46186	4.69631	4.45812
NM_003297	NR2C1	Homo sapiens nuclear receptor subfamily 2, group C, member 1 (NR2C1), transcript variant 1, mRNA.	1.5239	3.78e-11	6.21999e-07	3.47896	4.19723	4.15226	3.93406	4.76429	4.42684	4.14745	3.24782	4.16544	4.71896	4.39218	2.74854	2.63607	2.7129	2.8117	2.61063	2.80811	2.84563	2.09279	2.29934	2.38455	2.78844	2.58143	2.59671	2.80178	2.06244	2.83695	2.80464	2.76728	2.61575	2.8602	2.31333	3.03321	2.71394	2.53802	2.7686	2.74573	2.6356	3.016	3.47624	3.38992	2.90631	3.38992	2.90631
NM_014413	EIF2AK1	Homo sapiens eukaryotic translation initiation factor 2-alpha kinase 1 (EIF2AK1), mRNA.	1.52337	2.22e-10	3.65301e-06	7.83504	8.45953	8.07659	8.25547	7.07061	7.98184	8.29809	6.61999	8.03664	8.16268	7.32617	7.25439	6.89234	7.04929	7.63761	7.50724	6.56391	7.01124	6.91737	6.41781	7.49012	7.37191	6.27761	6.62683	6.89799	4.01732	7.37989	5.72596	7.23563	6.82976	6.06856	6.33666	7.46492	8.24583	7.95776	8.45172	8.55722	8.04862	6.9261	7.43222	7.48169	6.86645	6.01422	6.45858
NM_001039535	C18orf24	Homo sapiens chromosome 18 open reading frame 24 (C18orf24), transcript variant 1, mRNA.	1.52337	3.54e-14	5.82507e-10	1.97258	2.14567	1.89655	1.881	1.82782	1.72871	2.03166	2.00206	2.259	2.43141	2.69574	1.25032	1.42419	1.30803	1.22164	1.10367	1.55187	1.35634	1.23691	1.25824	1.31442	1.10033	1.08947	1.27727	1.20588	1.05732	1.06078	1.30118	1.18923	1.30497	1.08827	1.54392	1.6322	1.24771	1.10041	1.68622	1.34311	1.16073	1.47259	1.2758	1.72713	1.38045	2.42202	1.19853
NM_004335	BST2	Homo sapiens bone marrow stromal cell antigen 2 (BST2), mRNA.	1.52336	5.92e-10	9.74136e-06	5.84568	5.68205	6.15962	5.55768	6.27986	6.22218	5.95	5.69719	5.6269	5.57448	6.15514	4.91032	5.02023	5.48086	5.15711	4.79596	5.64815	5.22534	4.87498	5.22687	5.02564	5.03542	5.54509	5.02015	5.67117	4.38057	5.89186	5.06114	4.53636	4.48619	5.94482	4.80551	5.80542	4.83552	4.86689	5.15716	4.71845	4.99617	4.22447	5.33096	5.74455	5.16571	4.5203	4.34577
NM_001039619	PRMT5	Homo sapiens protein arginine methyltransferase 5 (PRMT5), transcript variant 2, mRNA.	1.52312	3.23e-14	5.31496e-10	7.24627	7.85912	7.48828	7.44302	7.60139	7.7561	7.71194	6.33081	7.29267	8.03093	6.6639	6.77269	6.7986	6.68068	6.98713	7.05844	6.57898	6.9128	7.1782	7.15849	6.91094	6.84213	7.00548	6.5019	6.52386	4.88246	6.65989	5.98835	6.73393	6.56903	6.93728	6.02739	6.92577	7.0684	6.50965	7.5677	7.45647	7.31133	6.61924	6.77522	7.12766	6.39976	5.67999	5.87374
NM_170692	RASAL2	Homo sapiens RAS protein activator like 2 (RASAL2), transcript variant 2, mRNA.	1.52307	6.16e-17	1.01363e-12	5.56076	6.05815	5.58973	5.55349	6.06461	5.92586	5.38691	4.95164	5.58963	5.70763	5.77991	4.78902	4.49916	4.40243	4.76003	4.59598	4.59833	4.53547	4.60879	4.44214	4.45214	4.46748	4.09155	4.37875	4.88915	4.33048	5.38201	4.10928	4.5724	4.35047	4.1801	4.25543	4.85961	4.95463	5.04203	5.07982	5.21638	4.86608	5.61688	4.98078	4.73145	4.57335	4.21525	4.42927
NM_002664	PLEK	Homo sapiens pleckstrin (PLEK), mRNA.	1.52302	7.66e-07	0.0126045	6.86036	7.3822	7.43528	6.93993	7.51171	7.02826	7.81794	5.3688	5.4743	6.77042	6.28769	5.58708	5.59318	4.97047	6.01775	6.95758	6.99221	5.74012	5.91116	6.31271	6.26209	6.09058	6.13398	7.55254	7.23287	4.53968	6.56152	4.45967	5.50566	5.449	5.03486	4.84901	5.23859	6.65725	5.26975	6.65378	6.74511	5.69407	5.40313	6.96393	7.12188	6.06212	5.69104	5.30589
NM_022782	MPHOSPH9	Homo sapiens M-phase phosphoprotein 9 (MPHOSPH9), mRNA.	1.52284	1.92e-17	3.15936e-13	4.46498	5.17578	4.95216	4.62409	4.75781	4.79781	4.92385	3.79377	4.88129	4.5061	4.42046	2.73633	2.96668	2.66831	3.22856	2.9617	3.05335	3.05335	2.79098	2.9148	3.1748	2.71853	2.69402	3.17931	3.22802	2.15541	3.45759	3.20857	3.52138	3.51921	2.84623	2.77853	3.88053	3.88256	3.70106	3.88965	3.60939	3.7417	3.7999	4.21533	3.9198	3.1836	3.00184	2.84212
NM_005788	PRMT3	Homo sapiens protein arginine methyltransferase 3 (PRMT3), mRNA.	1.52262	1.78e-14	2.92899e-10	4.81846	4.78721	5.04365	4.75492	5.12329	4.93782	4.95874	4.43312	4.98879	5.32683	4.53813	3.19078	3.1829	3.73721	3.6645	3.3593	3.83494	3.74634	3.50697	3.94033	3.59517	3.86763	3.60811	3.57201	3.46936	2.82525	3.42544	3.6381	3.35679	3.44147	3.46985	3.14714	4.51814	4.34786	3.935	4.13313	4.30841	4.07178	3.78433	4.723	4.70999	3.58119	3.32383	3.01479
NM_003902	FUBP1	Homo sapiens far upstream element (FUSE) binding protein 1 (FUBP1), mRNA.	1.52244	5.21e-14	8.57306e-10	6.82342	7.93382	7.68825	7.32296	7.6427	7.30457	7.29492	5.34445	7.76083	7.68277	7.41564	6.0994	5.91505	6.00999	6.63243	6.41449	6.4709	6.16913	5.98905	6.36487	6.4991	6.65451	6.24565	6.44466	6.32667	4.49229	6.85844	5.43286	6.62984	6.31093	6.05597	5.64093	6.52562	7.27185	6.83023	7.2141	7.06792	6.86659	7.16211	7.2994	7.08179	6.31331	5.13794	5.41894
NM_004896	VPS26A	Homo sapiens vacuolar protein sorting 26 homolog A (S. pombe) (VPS26A), transcript variant 1, mRNA.	1.52234	3.89e-11	6.401e-07	6.74234	7.27001	7.19621	7.00479	8.14424	7.73347	7.33945	5.71049	6.79973	8.09804	5.62659	5.07916	5.23053	5.73669	5.34466	5.40764	5.9996	5.2375	5.18284	5.94916	5.52961	5.64832	5.75903	5.73909	5.77867	3.44042	5.72995	6.10491	6.07765	6.03254	6.07014	5.50096	6.6685	6.74377	5.49453	6.8399	6.81426	6.04973	5.38397	6.67406	6.2444	5.53369	4.85382	4.46576
NM_015966	ERGIC3	Homo sapiens ERGIC and golgi 3 (ERGIC3), transcript variant 2, mRNA.	1.52223	1.23e-09	2.02396e-05	9.29714	9.18849	9.77058	9.5365	9.5807	9.22792	9.33064	7.89002	9.15515	9.93942	8.0617	8.88654	8.73859	8.92801	9.20202	8.70572	8.2798	8.82976	9.21253	9.05638	9.14002	8.71184	8.79166	8.3554	8.01447	5.03546	8.59625	6.93569	8.63429	8.1111	8.47788	8.01312	8.92044	9.23741	8.59574	9.27454	9.66965	8.99888	7.83496	8.8241	9.04096	8.77545	8.11681	8.0611
NM_015937	PIGT	Homo sapiens phosphatidylinositol glycan anchor biosynthesis, class T (PIGT), mRNA.	1.52197	4.36e-09	7.17438e-05	7.8559	8.11942	7.87893	8.0545	8.20575	7.92081	7.90369	6.69443	7.91156	8.49331	7.13013	8.03207	8.33362	7.36274	8.00727	7.56389	7.27449	8.45294	8.19933	7.27075	7.32057	7.77251	7.29541	6.60921	6.78455	5.04143	6.96861	6.42193	7.01894	7.42644	7.20077	7.05771	7.79222	7.92066	7.56216	7.83374	8.41221	8.09558	6.809	7.23881	7.61026	7.45262	7.15132	7.32563
NM_022778	CCDC21	Homo sapiens coiled-coil domain containing 21 (CCDC21), mRNA.	1.52177	2.07e-13	3.40618e-09	4.91345	5.32906	5.37509	5.27198	5.18766	5.11398	5.45732	5.03342	5.13872	5.60921	5.56829	4.11492	4.15398	4.31572	4.36752	4.52033	4.2077	4.23131	4.05739	4.28629	4.525	4.60768	4.25922	4.35857	3.94077	4.07775	4.01952	3.47271	4.04916	3.79067	3.73642	3.52761	4.22962	4.62956	4.4644	4.59277	4.49505	4.80631	3.69421	4.36287	4.68266	4.02118	3.88204	4.02118
NM_007045	FGFR1OP	Homo sapiens FGFR1 oncogene partner (FGFR1OP), transcript variant 1, mRNA.	1.52142	2.03e-13	3.34037e-09	5.37382	5.87585	5.74449	5.50851	5.52426	5.69544	5.7027	5.14137	5.85827	6.48062	6.06182	4.74742	4.75977	4.59776	5.14256	4.84548	4.86928	4.96216	4.97893	5.001	5.16223	5.3812	5.07437	5.27574	4.98439	4.15077	5.00583	4.71242	4.80796	4.89335	4.58925	4.69941	4.91775	5.57264	5.31458	5.2708	5.0366	5.21515	5.1986	5.38819	5.3178	4.35292	4.40986	4.19129
NM_001098615	PUS7L	Homo sapiens pseudouridylate synthase 7 homolog (S. cerevisiae)-like (PUS7L), transcript variant 1, mRNA.	1.52129	6.81e-13	1.12059e-08	4.88136	5.53834	5.35429	5.24636	5.37323	5.39227	5.72103	4.06377	5.32171	5.57567	5.21409	2.93186	3.30403	3.14261	3.52369	2.93743	3.84525	3.50922	3.15829	3.2308	3.44127	3.85835	3.74223	3.75152	3.50493	2.23262	3.78121	4.45212	3.95355	4.21523	3.76244	4.3107	4.90881	4.48386	4.43639	4.94867	4.64308	4.54488	3.9916	5.24631	4.27125	3.8188	3.35603	2.66784
NM_004881	TP53I3	Homo sapiens tumor protein p53 inducible protein 3 (TP53I3), transcript variant 1, mRNA.	1.52124	7.14e-14	1.17489e-09	6.92885	7.19719	7.36769	7.18111	7.25312	6.72798	6.74578	5.73297	6.60897	7.88367	6.55576	6.86851	7.18429	6.41937	6.54476	7.07696	6.55581	7.1145	6.36148	6.94425	6.24907	6.40305	6.0904	6.31168	5.83569	4.22518	6.24466	5.07085	5.8668	5.37971	5.97191	5.79756	6.00169	6.87251	6.14647	6.90626	6.6695	6.76877	6.15686	6.40273	6.83559	6.25267	5.7405	5.83988
NM_001007027	ALG8	Homo sapiens asparagine-linked glycosylation 8 homolog (S. cerevisiae, alpha-1,3-glucosyltransferase) (ALG8), transcript variant 2, mRNA.	1.52081	1.66e-11	2.73153e-07	6.03675	6.12485	6.57555	5.88868	6.51303	6.03313	6.5317	4.96389	6.64721	7.19223	5.26876	5.59071	5.15758	5.91589	5.8605	5.09648	5.43289	5.45362	5.20878	5.79296	5.34911	5.45395	6.22078	5.09045	5.16359	2.89564	5.33144	4.94414	5.80251	5.65271	5.26138	4.91265	6.08058	5.76159	4.82696	5.89824	5.87815	5.53871	3.91549	6.31637	6.36158	5.29454	6.02566	4.44397
NM_144580	C1orf85	Homo sapiens chromosome 1 open reading frame 85 (C1orf85), mRNA.	1.51996	7.93e-10	1.30488e-05	6.5435	6.81265	7.06079	6.67797	7.36959	6.67412	6.76578	5.87958	6.72584	7.24964	6.28971	6.6267	7.18202	6.4298	6.66547	6.04483	6.39781	7.18596	6.54309	6.43499	6.13589	6.55691	6.38934	5.94964	5.52672	4.69498	5.87028	5.7408	6.22149	6.4255	6.44849	6.16427	6.8191	6.99668	6.07831	6.56965	6.79793	6.45059	5.29233	6.55217	6.87514	6.29637	6.37265	5.91297
NM_153704	TMEM67	Homo sapiens transmembrane protein 67 (TMEM67), mRNA.	1.51987	5.4e-12	8.8857e-08	4.14844	4.66815	4.66117	4.20371	4.7065	4.56325	4.14776	3.91831	4.38206	4.89072	4.23745	2.51296	2.24709	2.54297	2.9825	2.5492	2.85674	2.50095	2.04942	2.74992	2.32525	2.57971	2.37829	2.75535	2.80467	2.14365	3.29421	3.25091	3.22677	3.02192	2.871	2.9479	3.35454	3.49342	3.35005	3.38786	3.27604	3.33426	3.40314	3.85337	3.20642	2.7821	2.68304	2.24571
NM_014252	SLC25A15	Homo sapiens solute carrier family 25 (mitochondrial carrier; ornithine transporter) member 15 (SLC25A15), nuclear gene encoding mitochondrial protein, mRNA.	1.5196	3.86e-12	6.35163e-08	6.15618	5.54671	6.17498	6.39499	5.89588	5.61586	5.92308	5.53656	5.88556	6.85843	5.76631	4.55539	5.93526	5.23155	4.95558	4.54159	4.84476	5.8109	5.16785	5.17349	5.03936	4.82164	5.41944	5.44995	4.81017	4.11717	4.89259	3.65178	4.96622	4.90335	4.92383	4.46444	5.67218	5.49443	5.09551	5.41581	5.30088	5.63066	5.28282	5.43919	5.69473	5.62863	4.72797	4.67575
NM_004280	EEF1E1	Homo sapiens eukaryotic translation elongation factor 1 epsilon 1 (EEF1E1), mRNA.	1.51948	5.68e-08	0.000934644	3.83041	4.30433	3.61106	3.33459	4.09028	3.3524	3.50094	2.82705	3.58212	4.61287	3.34949	2.23346	2.07322	2.06209	2.88999	2.47695	3.17489	2.67864	1.9425	2.73081	2.50504	3.39641	3.47397	2.93561	1.55001	1.30649	2.61432	2.53873	2.6234	3.19832	3.2804	2.96629	3.29994	3.16579	2.013	3.002	2.72028	2.34754	1.88873	4.53213	4.52491	2.94197	2.9452	3.20916
NM_030771	CCDC34	Homo sapiens coiled-coil domain containing 34 (CCDC34), transcript variant 1, mRNA.	1.51934	4.48e-14	7.37184e-10	3.58058	3.86779	3.80878	3.87996	3.96046	3.69116	3.84988	3.64603	3.46123	4.13638	3.83143	2.54153	2.75	2.87717	2.77174	3.16906	2.76616	2.58262	2.65873	2.7453	3.09911	2.70725	2.90766	2.93565	2.4889	2.80748	2.44516	2.36852	2.63119	2.78552	2.44504	2.56591	2.5397	2.58365	2.23785	2.67674	2.28179	2.07751	2.10181	3.12795	3.13117	2.77947	2.8219	2.71191
NM_006851	GLIPR1	Homo sapiens GLI pathogenesis-related 1 (glioma) (GLIPR1), mRNA.	1.51933	1.82e-06	0.0299481	7.46951	8.51843	8.33856	7.31838	8.97776	8.34119	7.88411	5.23984	6.4536	7.70216	6.73864	6.92088	7.37675	6.03741	7.52327	8.04455	8.52679	7.38321	6.78284	7.44884	7.48059	7.18236	7.86485	7.66025	6.578	3.31505	6.54933	6.91724	7.2713	6.43153	7.16204	6.66162	7.61747	7.24452	5.88514	7.53861	7.83063	6.89374	7.75677	7.36465	7.89057	6.55499	4.87955	6.08643
NM_002657	PLAGL2	Homo sapiens pleiomorphic adenoma gene-like 2 (PLAGL2), mRNA.	1.51896	8.13e-11	1.33779e-06	4.75227	5.06366	5.00227	4.99434	5.2271	5.18396	5.08777	4.07538	4.72087	5.6627	4.36161	4.39609	4.92437	4.58465	4.56912	4.86459	4.61834	5.20912	3.98414	4.171	4.60168	4.10105	4.19542	3.84708	3.93122	2.79992	3.9746	3.52114	3.86549	4.24812	3.46463	4.23993	4.86554	4.60162	4.21622	4.87211	5.26801	4.21705	3.98079	4.88279	5.21627	5.15619	6.63309	4.22189
NM_181696	PRDX1	Homo sapiens peroxiredoxin 1 (PRDX1), transcript variant 2, mRNA.	1.51884	1.46e-10	2.40243e-06	8.19111	8.55004	8.74462	8.19087	8.45264	8.21225	8.27877	7.11962	7.95073	8.92502	7.3055	6.86572	7.26598	7.10707	7.15904	6.78246	6.95842	6.93921	6.99359	7.96544	7.98297	7.36848	7.76405	7.50073	6.95889	5.66418	7.39966	6.89424	7.41487	7.36327	7.71983	6.94589	7.96568	8.29049	7.33114	7.89111	7.79221	7.9784	6.71787	7.9451	8.10895	7.20135	5.72177	6.77351
NM_031892	SH3KBP1	Homo sapiens SH3-domain kinase binding protein 1 (SH3KBP1), transcript variant 1, mRNA.	1.51831	4.36e-12	7.17438e-08	7.02624	7.52029	7.45046	7.38473	7.84296	7.16051	7.93499	6.13674	6.723	7.24327	6.56645	6.01587	6.16471	5.94068	6.3068	6.86273	6.67064	6.29534	6.3523	6.1911	6.50067	6.00589	6.4434	6.57953	7.2306	4.87328	7.01825	6.18647	6.8175	6.3214	6.20671	6.02042	6.73993	6.96394	6.27969	7.13359	7.26929	6.65359	6.28803	6.78872	6.50681	6.42268	5.35786	5.7877
NM_057749	CCNE2	Homo sapiens cyclin E2 (CCNE2), mRNA.	1.51801	9.05e-15	1.48918e-10	3.06751	2.86544	3.22613	3.27958	2.81562	2.69985	3.06206	2.45714	2.91295	4.06394	3.27502	1.57654	1.79394	1.81862	1.64021	1.6502	1.78877	1.53986	2.04189	2.10578	1.96098	2.20813	2.7853	1.66344	2.07166	2.10026	2.04418	1.56661	1.57306	1.89714	1.63753	1.91439	2.27187	2.17699	2.04246	2.49966	2.41004	2.1067	1.9957	2.38529	2.22243	1.74922	2.73212	1.57307
NM_001813	CENPE	Homo sapiens centromere protein E, 312kDa (CENPE), mRNA.	1.51762	2.11e-14	3.47201e-10	2.10257	2.56691	2.21034	1.99124	2.05203	2.19173	2.36549	2.15154	2.21397	2.32654	2.53109	1.19191	1.24669	1.19812	1.20925	1.28173	1.53562	1.31096	1.18342	1.18732	1.09453	1.22456	1.10396	1.62934	1.30231	1.35627	1.24122	1.38017	1.0373	1.28747	1.13894	1.46295	1.66854	2.00353	1.72147	1.7323	1.57546	1.5428	1.55538	1.34324	1.28022	1.38291	1.44289	1.07249
NM_004739	MTA2	Homo sapiens metastasis associated 1 family, member 2 (MTA2), mRNA.	1.51752	2.41e-14	3.96566e-10	7.56096	7.88926	7.80979	7.61675	7.60127	7.84094	8.2157	6.03289	7.03427	7.98463	6.7155	6.5106	6.83704	6.73884	6.75141	6.91336	6.40188	6.93941	6.67761	6.77084	6.8659	6.62066	6.50053	6.17517	6.64088	4.53815	7.16972	5.48311	6.95808	6.19797	6.39225	5.95646	6.81369	7.25851	6.52863	7.33339	7.4033	7.21928	6.57403	6.82837	7.16737	6.79675	4.70284	6.20474
NM_007007	CPSF6	Homo sapiens cleavage and polyadenylation specific factor 6, 68kDa (CPSF6), mRNA.	1.51723	3.47e-16	5.70989e-12	6.14121	7.00801	6.8495	6.78911	7.1875	7.01475	6.74107	5.84099	6.90921	7.17186	6.76491	5.61836	5.49211	5.55584	5.82019	5.55982	5.96681	5.72829	5.77946	5.81977	5.86819	5.78165	5.82856	5.86456	6.1281	4.94265	5.87458	5.69262	6.10032	6.43409	5.51767	5.81804	6.49641	6.36937	6.15428	6.12755	6.2273	5.90866	6.11978	6.46034	6.00445	5.55662	5.47839	4.87195
NM_000701	ATP1A1	Homo sapiens ATPase, Na+/K+ transporting, alpha 1 polypeptide (ATP1A1), transcript variant 1, mRNA.	1.51713	4.04e-08	0.000664782	9.41095	9.78255	9.55282	9.96774	9.67611	9.67067	9.28988	7.66239	9.44349	9.60438	8.36504	8.20706	9.8046	8.22603	8.57587	8.81389	8.21238	10.0181	8.36801	8.56164	8.62469	8.55859	8.54291	8.88821	8.47488	4.6311	9.02248	7.28358	9.43889	8.18693	8.069	7.85344	8.8139	9.49048	8.72134	9.1079	9.70838	8.9949	8.35698	8.92921	8.77519	10.0014	8.71728	7.9268
NM_016183	MRTO4	Homo sapiens mRNA turnover 4 homolog (S. cerevisiae) (MRTO4), mRNA.	1.51697	1.43e-12	2.35306e-08	6.99591	7.75888	7.24489	6.77532	6.94503	7.05589	7.12735	5.67801	6.87033	7.67304	6.79164	5.87353	5.91366	5.9241	6.68312	5.97325	5.78334	5.89431	6.13687	6.34779	6.75302	6.6293	5.66512	6.4048	5.35772	4.05698	5.58426	5.21829	5.5762	5.35996	5.83567	4.76971	6.39427	6.62598	5.90991	6.49795	6.55388	6.85604	5.27493	6.1891	6.49777	5.75822	4.18708	4.86013
NM_006232	POLR2H	Homo sapiens polymerase (RNA) II (DNA directed) polypeptide H (POLR2H), mRNA.	1.51668	1.16e-09	1.90878e-05	7.88811	8.62972	8.48071	8.22313	7.75224	7.82482	8.07185	6.1695	8.11738	8.78873	7.29074	8.17396	7.80103	7.47415	8.57343	8.59427	8.08372	7.96639	7.89548	8.08459	8.40063	8.38019	7.76229	7.4392	7.20992	4.76938	8.08492	5.79255	7.71406	6.33927	7.64261	6.62771	7.42159	8.40653	7.27316	8.29273	8.30076	8.32947	6.80851	8.5634	8.79918	7.3093	6.85004	6.62277
NM_001018113	FANCB	Homo sapiens Fanconi anemia, complementation group B (FANCB), transcript variant 1, mRNA.	1.51652	9.23e-13	1.5188e-08	2.32933	3.2543	2.05185	2.54304	2.07071	2.47625	2.84523	1.9832	2.43018	2.3491	2.70068	1.44561	1.30321	1.13861	1.32051	0.942721	1.43278	1.08087	1.36127	1.30923	1.60772	1.4309	1.20899	2.44269	1.66894	1.24392	1.31622	1.4656	1.29279	1.37078	1.3114	1.25591	1.73552	1.40571	1.56768	2.02915	1.63176	1.5863	1.64828	1.52746	1.61497	1.26816	1.86226	1.3675
NR_002578	GAS5	Homo sapiens growth arrest-specific 5 (GAS5) on chromosome 1.	1.51641	5.79e-12	9.52745e-08	4.49948	4.78348	4.56408	4.46639	4.96763	4.55076	4.22191	4.24954	4.13572	4.82541	4.24813	3.47656	3.28329	3.48815	3.12499	3.7018	3.53811	3.18059	2.82398	3.09989	3.01546	3.28138	3.31893	3.44342	3.35611	3.32287	3.65427	2.38742	2.58885	2.40904	2.56799	2.52439	3.30945	3.63518	3.24393	3.43854	3.23466	3.27134	3.51715	3.82468	3.34879	3.52718	2.79673	2.91039
NM_005032	PLS3	Homo sapiens plastin 3 (T isoform) (PLS3), mRNA.	1.51622	1.18e-10	1.94169e-06	7.19537	7.53617	7.58439	7.11936	8.10814	8.16941	7.60464	6.34021	6.9533	7.79957	5.97272	6.10557	5.26098	6.50783	6.29898	5.43305	6.51933	5.66753	6.18428	6.4206	5.81276	6.13279	6.38368	5.94658	6.89213	3.68944	7.16816	6.84064	6.79693	6.21496	6.51218	5.67667	7.13415	6.66709	6.18222	7.18068	6.97417	6.65849	6.10786	6.77989	6.65741	5.73169	5.20745	4.7145
NM_030752	TCP1	Homo sapiens t-complex 1 (TCP1), transcript variant 1, mRNA.	1.51621	1.46e-08	0.000240243	9.85935	10.5752	9.98782	9.99974	9.608	10.0945	10.2399	8.13212	9.25851	9.61868	8.49524	8.42177	7.87521	8.79399	9.08126	8.42963	8.36187	8.185	8.70345	8.99038	8.82646	9.12949	8.43212	9.04453	9.37275	4.77018	10.161	8.00066	9.61593	7.94316	8.33299	7.31758	8.41475	9.91565	8.94687	9.95157	9.78111	9.87193	8.87696	8.61067	8.63734	8.32436	6.77351	7.00543
NM_032023	RASSF4	Homo sapiens Ras association (RalGDS/AF-6) domain family 4 (RASSF4), mRNA.	1.51618	2.58e-11	4.24539e-07	5.49779	6.25752	5.79683	5.87873	6.46714	6.01532	5.75662	5.05339	5.6513	5.91684	5.69628	5.28362	5.23436	4.30612	5.1285	5.44911	5.44293	5.57964	4.90014	4.32416	4.68236	4.37743	4.56507	5.46884	4.95313	4.00721	5.33976	4.37436	4.76969	4.84521	4.42225	4.6275	4.55197	5.16055	4.52686	4.61493	4.89998	4.67944	5.0853	4.66822	4.87317	5.0182	4.57346	4.50531
NM_152450	FAM81A	Homo sapiens family with sequence similarity 81, member A (FAM81A), mRNA.	1.51589	9.84e-09	0.000161917	4.14227	4.65955	4.25268	4.30463	4.30791	4.15059	4.65411	4.54933	4.081	4.52354	5.14137	3.16961	3.23388	3.15195	3.19801	2.91549	2.84262	2.91643	3.28319	3.25849	3.31315	3.68894	3.23554	3.57726	3.46079	3.62604	2.96337	3.19112	3.05632	3.38099	2.9214	2.71034	2.73866	2.64666	2.76896	2.85126	2.91281	2.81481	3.01355	2.63868	2.77173	2.95867	2.41742	2.79548
NM_001084	PLOD3	Homo sapiens procollagen-lysine, 2-oxoglutarate 5-dioxygenase 3 (PLOD3), mRNA.	1.51554	2.74e-13	4.50867e-09	7.10402	7.34472	7.25831	7.17172	7.21349	7.24786	7.08724	6.77992	7.08633	7.20999	7.09612	6.25798	6.57181	6.17649	6.25068	5.77837	6.11585	6.58305	6.26877	6.33847	6.08707	6.20854	6.24215	5.68659	6.42209	5.46545	6.1918	5.53153	6.17025	5.83484	6.00856	5.67058	6.31808	6.73668	6.49627	6.43511	6.74855	6.55993	6.27641	5.91348	6.19381	6.23522	5.44049	5.84111
NM_002296	LBR	Homo sapiens lamin B receptor (LBR), transcript variant 1, mRNA.	1.51523	1.04e-09	1.71132e-05	7.42391	9.26427	8.04257	7.9612	8.43247	8.9658	8.23374	5.70486	7.12741	7.30566	6.60247	6.22263	6.49415	6.57812	6.84527	6.47719	7.36877	6.75128	5.45998	7.33119	6.56117	6.69578	6.19346	7.04359	7.10586	4.23062	6.73895	6.88844	7.5147	5.72621	6.37027	5.85737	6.71706	7.49676	6.08031	7.48934	7.39558	7.03542	8.17362	7.14049	6.95153	6.49292	5.67195	5.50874
NM_032192	PPP1R1B	Homo sapiens protein phosphatase 1, regulatory (inhibitor) subunit 1B (dopamine and cAMP regulated phosphoprotein, DARPP-32) (PPP1R1B), transcript variant 1, mRNA.	1.51491	1.9e-06	0.0312645	6.38636	6.66061	6.42101	6.94203	6.50751	6.33615	6.72451	6.56673	6.27013	6.33305	6.01539	5.91275	6.52274	5.67524	5.51269	5.66137	5.70438	6.45998	5.52344	4.9788	5.03087	5.18856	4.96335	6.11038	5.81823	5.02837	5.83915	5.8544	6.36089	5.06925	5.66089	5.48738	5.54959	5.5793	5.74673	5.6159	5.80054	5.25777	5.85874	5.26133	5.34205	6.14555	4.9927	5.53605
NM_005225	E2F1	Homo sapiens E2F transcription factor 1 (E2F1), mRNA.	1.51475	1.46e-16	2.40243e-12	6.56194	6.18865	6.43326	6.31334	5.89654	6.17649	6.23964	6.60146	6.28105	6.66289	6.8175	5.48871	5.71644	5.45373	5.41304	5.48543	5.48091	5.55343	5.42992	5.22019	5.11215	4.8552	5.19039	5.26316	4.9562	5.26809	5.04051	4.96003	4.88638	5.09104	5.16551	5.21643	5.3681	5.51881	5.19114	5.61848	5.50654	5.49232	5.41698	5.13773	5.23874	5.42934	5.30232	5.33126
NM_000947	PRIM2	Homo sapiens primase, DNA, polypeptide 2 (58kDa) (PRIM2), mRNA.	1.51465	4.72e-10	7.76676e-06	3.56718	4.97051	4.56567	3.97748	3.94677	4.31647	4.05091	2.88188	3.88046	4.30774	4.35896	2.45446	2.23181	2.43389	2.62145	2.50303	2.8834	2.18574	2.08843	2.82639	2.50285	2.79409	2.32519	2.57614	2.42681	1.8003	2.41833	2.25178	2.08717	1.8879	1.78666	2.24189	2.21597	2.82902	1.99269	2.82377	2.45429	2.34332	2.31459	3.18803	2.54904	2.59186	1.96643	1.79604
ENST00000274217	FAM105A	family with sequence similarity 105, member A (FAM105A), mRNA gene:ENSG00000145569	1.51453	1.34e-08	0.000220497	5.77039	6.47222	6.49855	6.32021	6.48981	6.30359	6.09953	4.9616	6.14313	5.51515	5.61954	4.58849	5.87361	5.00218	5.28458	6.09653	5.83226	5.76993	4.53172	5.40344	5.67607	5.62187	5.22087	5.87902	4.84628	3.46349	3.97661	4.68077	4.43188	4.38032	4.20674	5.1782	5.7927	5.43616	4.85289	5.2454	5.4544	4.76985	4.6535	5.82139	5.41193	5.41947	4.92526	4.20881
NM_004494	HDGF	Homo sapiens hepatoma-derived growth factor (high-mobility group protein 1-like) (HDGF), mRNA.	1.51432	1.81e-14	2.97835e-10	8.0503	8.49696	8.07226	7.91165	7.78739	7.94626	8.09789	7.36168	7.80528	8.6374	7.0211	6.97322	7.82474	6.93886	7.07357	7.13235	7.44763	7.88061	6.81529	7.38921	7.3709	7.00327	7.17468	7.23134	7.25305	5.19326	7.10464	6.00814	6.75727	6.94411	6.91355	6.37455	7.16987	7.63042	6.52727	7.33427	7.30262	7.20006	6.40635	7.30006	7.58643	6.92959	6.79941	6.88671
NM_002415	MIF	Homo sapiens macrophage migration inhibitory factor (glycosylation-inhibiting factor) (MIF), mRNA.	1.51421	8.3e-10	1.36576e-05	8.80454	8.27307	8.39946	8.53173	7.88435	8.5483	8.72918	7.98044	8.74374	8.46667	8.47646	8.26602	9.14401	8.16094	8.36461	7.83296	7.69017	9.11778	8.57856	8.20498	7.61263	8.06221	7.71897	7.71623	7.27141	6.62841	7.86653	7.66507	7.84718	8.18658	9.04089	8.09489	8.80025	8.44833	7.74758	8.38585	8.32161	8.15347	7.01152	7.73927	8.31486	8.16413	8.17696	7.02922
NM_032013	NDRG3	Homo sapiens NDRG family member 3 (NDRG3), transcript variant 1, mRNA.	1.51389	4.89e-17	8.0465e-13	6.17134	6.25556	6.32042	6.15563	6.32353	6.3277	6.26234	5.13694	5.55604	6.13412	5.47991	4.955	4.9835	4.7471	4.96995	4.94231	4.75942	4.92444	5.03345	5.00341	5.29422	5.18286	4.60434	4.63455	4.4322	3.37262	4.59547	4.77862	5.05621	5.21944	4.52645	4.49975	5.89899	5.82787	5.075	5.85719	6.15336	5.71905	5.09145	5.61396	5.60962	5.57041	5.25596	4.786
NM_006187	OAS3	Homo sapiens 2'-5'-oligoadenylate synthetase 3, 100kDa (OAS3), mRNA.	1.51363	3.01e-12	4.95296e-08	6.53994	6.74135	6.51632	6.46588	6.34434	6.66895	6.88506	6.13136	6.01265	6.91419	6.20458	5.15427	5.88936	5.93647	5.48695	5.77278	5.66634	5.65522	4.99709	5.16091	5.21534	5.0863	5.73425	5.49967	5.53334	4.26774	5.33282	4.66873	5.23729	5.54504	5.65889	5.35519	5.73607	5.92357	6.49728	6.27937	6.12223	6.32544	4.99462	5.4777	5.9251	5.55221	5.07098	5.73619
NM_022111	CLSPN	Homo sapiens claspin homolog (Xenopus laevis) (CLSPN), mRNA.	1.51351	4.09e-15	6.73009e-11	3.33919	3.47946	3.16858	3.26647	3.29591	3.26919	3.42339	3.3857	3.19353	3.68032	3.57111	1.80363	2.24842	2.0174	1.90264	2.08131	2.10411	2.03911	1.78512	2.01115	1.97219	1.71977	1.82386	1.94144	2.14776	1.98632	1.92602	1.80951	1.84363	1.80051	1.80089	1.97139	1.8135	2.29646	1.89487	2.0814	1.83383	2.14916	1.96594	2.02356	1.98598	2.3329	1.76602	1.86517
NM_001040614	LINS1	Homo sapiens lines homolog 1 (Drosophila) (LINS1), transcript variant 4, mRNA.	1.51335	2.17e-15	3.57074e-11	4.56824	5.20102	5.22649	5.11058	4.73521	4.8843	5.1237	4.36197	4.95553	5.49542	4.931	2.59632	2.77272	3.16213	3.13022	3.02753	2.9984	2.95329	3.12238	3.45169	3.37401	2.97607	3.36926	3.49184	3.53541	2.95147	3.01191	3.22853	3.46382	3.39021	3.14834	4.02895	4.47576	4.23648	4.14406	4.27152	4.30766	4.28127	3.87326	4.60975	4.34912	3.72679	3.8324	3.36334
NM_004642	CDK2AP1	Homo sapiens CDK2-associated protein 1 (CDK2AP1), mRNA.	1.51309	1.29e-11	2.12269e-07	8.47807	9.06546	8.62167	8.67773	9.43253	8.71249	8.73903	7.3581	8.20047	9.17741	7.82927	7.75792	7.52241	7.74801	7.85912	8.14887	8.16384	7.72344	8.30002	8.24886	8.01525	7.4788	8.23096	8.24667	7.18302	5.56341	7.47862	6.69194	8.22742	7.31226	7.64114	6.98405	7.64132	7.99237	7.34615	8.2899	8.2174	8.23756	7.32768	7.62893	7.71701	7.53518	6.39613	7.62893
NM_018183	SBNO1	Homo sapiens strawberry notch homolog 1 (Drosophila) (SBNO1), mRNA.	1.51305	2.32e-16	3.81756e-12	6.15346	6.8252	6.5336	6.45812	6.55517	7.0752	6.7644	5.31602	6.41607	6.3808	6.13316	4.90793	4.87338	5.23906	5.19036	4.88753	5.59311	5.21422	4.89846	5.08861	5.19277	5.03247	5.30823	5.91965	6.09966	4.03903	5.90071	5.7164	6.02411	5.54443	4.96507	5.11576	6.15157	5.83504	5.64487	6.0315	5.93566	5.54681	5.99432	5.93029	5.58983	5.42883	4.91386	4.24316
NM_198389	PDPN	Homo sapiens podoplanin (PDPN), transcript variant 2, mRNA.	1.5126	2.23e-13	3.66946e-09	7.02698	7.03256	7.10638	6.97425	7.54665	7.57753	6.73231	6.43481	6.29716	7.43661	7.18246	6.27388	5.97274	6.12878	6.24938	6.60114	6.79939	5.93853	5.89287	6.05525	5.68516	5.92796	6.31977	5.61339	5.43906	4.76077	6.0561	5.70909	5.48773	5.17428	6.03372	6.07278	5.94164	5.75974	5.42688	5.98022	6.48067	5.96494	5.96282	5.41847	5.44758	5.41847	5.4326	5.36198
NM_000014	A2M	Homo sapiens alpha-2-macroglobulin (A2M), mRNA.	1.51259	1.56e-07	0.00256698	9.22491	10.081	10.15	9.47949	11.1014	10.0137	9.27438	7.60887	8.88321	9.78626	8.93374	8.59423	8.28342	8.454	8.86632	8.95968	9.11763	8.37322	8.96888	8.77766	8.71428	8.76451	9.19257	8.43439	8.83779	4.30071	9.30676	8.44511	9.51868	8.79426	9.05242	8.65698	9.25618	9.17617	8.21905	9.08457	9.41793	9.01315	9.29415	8.89905	9.1435	8.87983	7.04936	8.42016
NM_002526	NT5E	Homo sapiens 5'-nucleotidase, ecto (CD73) (NT5E), mRNA.	1.51245	3.64e-07	0.00598962	5.21687	7.04217	6.03742	6.25335	7.19078	7.0808	6.46762	4.55454	5.7279	5.84504	5.45096	4.7974	5.21037	5.11956	5.42954	4.94839	5.67205	5.60666	4.48125	4.83525	4.31632	5.58977	4.64378	5.68996	4.90427	2.79897	4.9492	5.73773	6.24004	4.30585	5.28105	4.42976	5.2657	5.54851	4.77626	5.37508	6.3633	5.10201	4.81711	5.73994	5.04288	5.78247	3.97766	3.87225
NM_133259	LRPPRC	Homo sapiens leucine-rich PPR-motif containing (LRPPRC), mRNA.	1.51149	6.88e-10	1.1321e-05	7.31035	8.16861	7.74872	7.44613	7.5844	8.123	7.58	5.75421	7.97492	7.7027	6.95089	6.29812	5.99383	6.36117	6.71279	5.96035	6.59511	6.21391	6.00109	6.21915	6.48299	6.73296	5.95524	6.41356	6.83105	3.17683	7.62351	6.6892	6.92253	6.61625	5.9255	6.21898	6.85536	7.58699	7.39871	7.25944	7.15282	7.03125	6.78036	7.6281	6.84554	6.78818	6.33542	5.45961
NM_139276	STAT3	Homo sapiens signal transducer and activator of transcription 3 (acute-phase response factor) (STAT3), transcript variant 1, mRNA.	1.51148	7.74e-10	1.27362e-05	9.64963	10.0283	9.56857	9.76348	10.1171	10.0064	9.86397	7.57537	8.72552	9.7628	8.45261	8.27554	8.52698	8.24452	8.76548	9.18161	8.88365	8.63956	8.58519	8.66845	8.86003	8.53854	9.01619	8.85536	8.80575	5.21776	9.36598	7.55814	8.9274	7.94123	8.5127	7.86959	8.93488	9.08408	8.51472	9.22251	9.61655	9.10287	9.05402	8.38016	8.45519	8.4525	7.48591	8.08033
NM_199427	ZFP64	Homo sapiens zinc finger protein 64 homolog (mouse) (ZFP64), transcript variant 4, mRNA.	1.51133	3.25e-15	5.34788e-11	5.88183	6.26451	5.88626	6.14742	5.89774	6.07899	6.28325	5.1485	5.51676	6.49316	6.14637	5.16154	5.48107	5.12392	5.44877	5.34314	5.18987	5.61424	4.99959	4.77133	4.89893	5.08462	4.87282	4.38266	4.71525	3.75798	4.70244	4.36719	4.75474	5.07156	4.71333	5.00793	5.36966	5.38729	5.19586	5.59722	5.67741	5.59812	5.0075	5.04035	5.0374	4.87707	5.09593	5.04722
NM_005721	ACTR3	Homo sapiens ARP3 actin-related protein 3 homolog (yeast) (ACTR3), mRNA.	1.51116	8.02e-08	0.00131969	8.83668	9.6847	9.39862	8.9537	9.67359	9.14986	9.14801	6.86496	8.88267	9.94833	8.23391	7.85335	8.04471	8.00152	8.51066	9.11096	9.36532	8.36304	7.70296	9.08141	9.17053	8.76173	9.00113	8.68683	8.1703	4.00106	8.62838	7.85138	8.59491	8.56285	8.29149	7.38502	8.55198	9.2756	8.24669	9.2059	9.14737	8.68465	8.62067	9.62374	9.42431	7.80379	6.82919	7.40102
NM_001560	IL13RA1	Homo sapiens interleukin 13 receptor, alpha 1 (IL13RA1), mRNA.	1.51085	9.98e-10	1.64221e-05	6.54955	7.34389	7.51977	7.26162	8.33368	7.96791	7.23287	5.84627	7.22085	8.08038	6.03804	6.08833	6.19853	6.29952	6.50831	6.7286	7.04683	6.5857	5.97708	6.78567	6.39973	6.35359	6.58177	6.65859	6.52067	3.08259	6.57749	7.14375	6.87474	7.25511	6.93806	6.34137	7.25402	6.7811	6.01199	6.54469	6.98514	6.31292	6.04092	7.02204	7.07542	6.33885	6.01803	5.47388
NM_001416	EIF4A1	Homo sapiens eukaryotic translation initiation factor 4A, isoform 1 (EIF4A1), mRNA.	1.51078	5.8e-09	9.5439e-05	7.21769	7.91948	7.65722	6.49653	8.2536	7.62527	7.25813	5.03407	7.36873	8.88279	5.8532	5.98375	5.78709	7.40016	7.23995	6.70011	6.40636	6.8203	6.64334	7.50811	6.12921	6.61498	7.62836	6.64306	6.51724	3.8211	7.4605	6.42873	6.47402	5.39664	6.59064	5.45744	7.10817	7.57266	6.21181	6.72301	6.97768	7.23996	6.64701	7.38218	8.20757	6.19329	4.0649	4.26738
NM_144578	C14orf32	Homo sapiens chromosome 14 open reading frame 32 (C14orf32), mRNA.	1.51066	1.88e-08	0.000309354	8.5933	8.77542	8.37808	8.67394	8.6669	8.7676	8.52592	6.11597	8.15979	9.00888	7.34833	7.72088	7.19723	7.28568	7.86748	8.02118	8.05538	7.64278	7.3399	7.49197	7.71315	7.46746	7.78438	6.59314	7.13877	3.47035	7.9808	7.28616	7.81269	7.83597	7.47603	7.18126	8.18187	8.45899	7.5943	8.73563	9.06205	8.50375	8.13778	7.69869	7.81679	7.57459	6.97816	7.10534
NM_014363	SACS	Homo sapiens spastic ataxia of Charlevoix-Saguenay (sacsin) (SACS), mRNA.	1.51065	2.64e-07	0.00434412	5.14599	6.21914	5.02329	4.72923	6.08187	6.05219	5.35266	4.17252	4.31543	5.01599	4.75116	2.944	3.22026	2.91463	3.19418	2.96486	3.95681	3.05172	2.98661	3.8748	3.11309	3.09298	2.94706	3.92458	3.54922	2.76481	3.75984	4.46586	4.4318	3.11028	3.01169	3.40873	3.7423	2.9629	2.96785	3.83589	3.7899	3.08443	5.56459	3.81816	3.08738	2.74066	3.07619	2.26148
NM_005347	HSPA5	Homo sapiens heat shock 70kDa protein 5 (glucose-regulated protein, 78kDa) (HSPA5), mRNA.	1.50999	9.75e-11	1.60436e-06	8.6475	8.0433	8.59951	8.20498	8.41099	7.89996	8.23628	7.51148	8.26541	8.88875	7.79134	6.36296	7.54997	7.549	7.62615	7.5052	7.55457	7.9583	6.8839	8.10269	7.74016	7.29098	8.81394	7.54134	7.63454	4.91558	7.97159	7.5387	8.31346	7.31399	7.93187	7.63192	9.60387	8.03193	7.14426	8.61984	8.32497	8.02279	7.01279	8.7564	8.2078	8.68745	7.62474	7.37028
NM_000303	PMM2	Homo sapiens phosphomannomutase 2 (PMM2), mRNA.	1.50973	1.11e-12	1.82651e-08	6.19066	6.1341	6.0256	6.10578	5.45903	5.85717	6.07992	5.33931	6.2295	6.4752	6.16313	5.15747	5.41672	5.02601	5.67956	5.21357	4.86401	5.76196	5.18396	5.78186	5.75156	5.75058	5.56502	5.47323	5.22467	4.12289	5.56724	5.21807	5.61145	5.3177	5.25452	4.95816	6.0888	6.28398	5.76046	6.57458	6.24393	5.85222	6.21428	5.84782	6.25258	5.27805	3.78099	4.80377
NR_001296	TRY6	Homo sapiens trypsinogen C (TRY6) on chromosome 7.	1.50948	1.03e-07	0.00169487	1.55411	1.34652	0.650266	2.90611	1.54708	1.4138	1.69904	0.988538	1.2366	1.98236	1.28155	1.89281	5.80861	1.80208	1.89281	2.13419	2.41311	7.16281	2.56882	1.95334	0.567128	0.737236	0.476405	2.25337	1.24893	1.25911	0.763019	0.919861	1.03034	1.38304	0.990812	2.16599	1.35297	2.03181	0.858455	1.51905	1.59718	0.552822	1.05533	0.60541	0.104772	2.915	3.55725	2.81673
NM_005321	HIST1H1E	Homo sapiens histone cluster 1, H1e (HIST1H1E), mRNA.	1.50922	1.42e-09	2.33661e-05	9.21929	9.91328	9.43444	9.51395	9.03829	8.91583	9.69785	8.19231	8.98765	9.21383	9.40256	8.69754	7.9814	8.09917	8.96314	8.17516	8.34104	8.12829	9.211	8.3304	8.64592	8.51019	8.07852	7.81531	7.00624	5.45565	7.57154	7.33222	7.60072	8.1465	8.48557	7.48819	8.67635	9.37579	9.21667	8.91198	8.97952	9.10034	8.86885	8.91066	9.56218	9.31312	7.56019	8.29404
NM_003579	RAD54L	Homo sapiens RAD54-like (S. cerevisiae) (RAD54L), mRNA.	1.50914	2.63e-15	4.32767e-11	5.05026	4.70709	4.95728	4.96408	4.7838	4.87266	4.9907	5.07833	4.72217	5.20775	5.29369	3.63685	3.81644	3.56129	3.73985	3.79601	4.0122	3.96425	3.15962	3.38305	3.12692	3.14875	3.44794	3.45135	3.32214	3.38313	3.16049	3.13806	2.99834	2.93731	3.23506	3.60688	3.545	3.58557	3.6935	3.67146	3.55898	3.82415	3.59902	3.69336	3.48278	3.42901	3.89922	3.68156
NM_005628	SLC1A5	Homo sapiens solute carrier family 1 (neutral amino acid transporter), member 5 (SLC1A5), mRNA.	1.50902	6.37e-09	0.000104818	7.16126	6.56598	6.98432	7.25423	7.02694	6.59585	7.28103	6.09978	7.00534	7.51241	7.09971	6.17127	6.49638	6.1743	6.36199	6.13943	6.34511	6.54702	6.15038	6.20894	6.00527	6.06662	6.80145	5.68759	6.66803	4.65154	6.28117	5.15138	6.10367	5.80628	5.81411	5.82949	6.38862	6.7208	6.06704	6.205	6.43012	6.55037	5.35473	5.85389	6.36541	6.35689	5.5347	5.51348
NM_004447	EPS8	Homo sapiens epidermal growth factor receptor pathway substrate 8 (EPS8), mRNA.	1.50875	2.14e-10	3.52137e-06	7.02249	7.51153	7.32915	7.42252	7.58432	7.13421	7.11653	5.95668	6.82858	8.00923	6.50997	6.02746	6.43496	6.20179	6.25029	6.63232	6.27069	6.60609	5.95998	6.31403	6.44445	6.08605	6.77411	5.99129	6.95308	3.065	6.91098	5.87045	6.62322	6.75811	6.30138	6.18751	7.12983	6.90758	6.6437	7.20279	7.29237	6.82805	5.90478	7.05485	6.8712	6.30384	5.2009	5.61449
NM_006135	CAPZA1	Homo sapiens capping protein (actin filament) muscle Z-line, alpha 1 (CAPZA1), mRNA.	1.50854	1.32e-10	2.17206e-06	8.14958	8.44375	8.84591	8.03319	8.25607	8.47035	7.84305	6.15912	7.75902	8.85653	7.5637	7.54228	7.9409	7.14725	8.08598	8.01969	8.06052	8.11219	7.19842	7.73172	7.62476	7.8756	7.69587	7.45903	7.18692	4.80731	8.43341	7.61007	8.00098	8.32816	8.18124	7.62666	7.59015	8.1686	7.45958	8.14979	8.11576	7.66552	7.13486	8.60932	8.58439	6.91595	6.63133	6.90052
NM_015939	TRMT6	Homo sapiens CGI-09 protein (CGI-09), mRNA.	1.50853	4.38e-16	7.20729e-12	6.62138	6.79884	6.6588	6.529	6.91988	6.73267	6.76488	6.26338	6.68204	7.43583	6.27815	5.72996	6.12487	5.79854	6.02667	5.93568	6.23401	6.1548	5.66874	5.80352	5.86409	5.64776	6.32441	5.74451	5.67346	5.16095	5.60565	5.59287	5.71912	5.68927	5.86405	5.39086	6.15001	6.2037	5.57504	6.19984	6.24644	6.3441	5.80383	5.78899	6.09888	5.46091	5.04707	5.25317
NM_017839	AYTL1	Homo sapiens acyltransferase like 1 (AYTL1), mRNA.	1.50851	5.76e-11	9.47808e-07	5.67934	6.42181	5.82571	6.00093	6.42158	6.06151	6.10744	5.10524	5.75552	6.10502	5.14332	5.17788	4.99789	4.96247	5.29732	6.05578	5.82827	5.17614	4.86306	4.84666	5.04692	4.84704	5.24971	5.4531	5.08352	3.54055	4.76578	4.28785	5.94391	4.71378	4.27609	4.35327	5.30459	5.50575	5.19913	5.75409	5.81109	5.25875	4.67237	4.98549	5.64985	4.98352	5.14716	4.54098
NM_004390	CTSH	Homo sapiens cathepsin H (CTSH), transcript variant 1, mRNA.	1.50848	8.43e-09	0.000138716	8.27379	8.05722	8.68702	8.18315	7.97526	7.48211	6.98388	6.70184	7.62082	8.27917	6.6415	6.9476	6.93529	7.44464	7.49731	7.59491	6.90081	7.07506	7.30172	7.73639	7.777	7.10613	7.48355	7.26148	6.03398	3.28574	6.81194	5.80934	7.71467	6.55257	6.82009	6.6411	7.2085	7.79386	7.07145	7.53129	7.93365	7.59055	4.84094	7.98394	8.05271	6.98175	6.41156	6.56216
NM_014288	ITGB3BP	Homo sapiens integrin beta 3 binding protein (beta3-endonexin) (ITGB3BP), mRNA.	1.50842	6.14e-08	0.00101034	5.65977	6.09108	5.69788	5.25884	7.00029	6.29042	5.85505	4.14259	4.82622	6.17899	3.83852	4.05792	4.14593	3.86072	5.10475	5.49823	5.88856	4.44233	3.7035	4.95686	5.41619	4.82157	4.35666	6.00063	3.95449	2.79772	4.27619	3.86448	5.0236	5.28997	5.60074	3.95126	4.44977	4.81648	3.92911	4.84072	4.74502	4.41043	3.48309	5.92872	6.01794	4.40691	2.92659	3.23425
NM_005702	ERAL1	Homo sapiens Era G-protein-like 1 (E. coli) (ERAL1), mRNA.	1.50841	1.72e-11	2.83026e-07	7.0934	7.11857	6.74061	7.00784	6.64331	6.74861	6.93621	6.09822	7.13145	7.31858	6.61942	6.96963	6.86214	6.28333	6.80316	6.12684	5.98598	6.92819	6.97931	6.50996	6.29889	6.52102	6.35738	5.61838	5.9358	4.23301	6.06494	5.16639	5.7711	6.07809	5.81057	5.62886	6.77955	6.96329	6.72214	7.05943	7.04326	6.97545	6.14401	6.53806	7.08656	6.37901	5.4513	6.29058
NM_002632	PGF	Homo sapiens placental growth factor, vascular endothelial growth factor-related protein (PGF), mRNA.	1.50816	3.02e-12	4.96941e-08	6.09092	6.00213	6.21639	6.29184	6.30789	5.91092	5.74232	5.95212	5.32864	5.84079	5.76295	4.67391	5.14657	5.13252	4.80736	4.32114	4.699	5.30625	4.86672	4.69798	4.07083	3.945	4.39785	4.52072	4.57031	4.10499	4.54382	4.10771	3.70943	4.40623	4.32951	4.37021	4.55722	4.74919	4.8102	4.53675	4.61275	4.66242	4.08197	4.37745	4.41756	4.57196	4.72944	4.4927
NM_002796	PSMB4	Homo sapiens proteasome (prosome, macropain) subunit, beta type, 4 (PSMB4), mRNA.	1.50764	3.64e-09	5.98962e-05	9.77437	10.177	10.3855	9.64441	10.5456	9.96398	9.80332	8.7825	9.74096	10.6042	9.02469	9.34882	9.88532	9.80357	10.0245	9.37328	9.94724	10.0114	9.35272	10.2226	9.59786	9.71836	9.55809	9.60637	8.55001	5.99707	9.19139	8.2337	9.3941	9.57569	10.2573	8.91489	9.33188	9.53229	8.48568	9.082	9.21891	9.33592	8.50933	9.98546	10.1851	10.0396	8.08614	8.77156
NM_004131	GZMB	Homo sapiens granzyme B (granzyme 2, cytotoxic T-lymphocyte-associated serine esterase 1) (GZMB), mRNA.	1.50758	1.4e-06	0.023037	6.71328	6.41189	6.47326	6.72615	7.14301	5.93208	5.97614	4.83445	5.62991	6.2227	5.31907	4.90701	5.7509	4.74106	4.96659	6.38039	6.44424	5.9474	4.8564	5.61632	5.56638	4.57342	5.76609	5.53749	5.39701	3.92367	4.7672	3.70163	4.04901	5.97653	5.4531	4.46943	5.22752	6.26338	4.30251	4.74002	5.15272	4.80227	4.03464	4.58291	6.0946	4.60615	4.32117	4.71208
NM_022754	SFXN1	Homo sapiens sideroflexin 1 (SFXN1), mRNA.	1.50754	1.59e-14	2.61634e-10	6.93976	7.34088	7.06581	6.90052	7.12439	6.75826	7.11069	5.96404	6.4652	6.95212	6.33696	5.67404	5.87814	5.92505	6.02006	6.04224	5.67511	6.12422	5.33668	5.89451	6.20726	5.95518	5.64719	6.08427	5.93892	3.43975	6.08317	4.99067	5.69432	5.76045	5.12124	5.01995	5.86716	6.68643	6.0873	6.54819	6.43535	6.53181	5.45104	6.49956	6.36817	5.74197	5.29287	4.90634
NM_020772	NUFIP2	Homo sapiens nuclear fragile X mental retardation protein interacting protein 2 (NUFIP2), mRNA.	1.50745	1.03e-11	1.69487e-07	7.01884	7.41819	7.37944	6.99183	7.48554	7.41493	7.23571	5.54355	7.18891	7.92964	6.57639	5.50267	5.38866	5.93909	5.73766	5.2883	5.89496	5.58496	5.25046	5.33572	5.69298	5.81007	5.94484	5.88114	6.50145	5.31661	6.96141	6.1028	6.32489	6.22748	5.45068	5.53321	6.96504	6.75747	6.63014	6.91444	7.0415	6.52983	6.6056	6.82125	6.603	6.11324	5.10676	4.9527
[truncated: 129 more rows]
[truncated: 46 more columns]
